# Supplementary material for: trans-1,2-Diaminocyclohexane-based sulfonamides as effective hydrogen-bonding organocatalysts for asymmetric Michael–hemiacetalization reaction
Source: Royal Society of Chemistry journal article supplement (doi:10.1039/c8cy01199k), 2018-01-01
Supplement: c8cy01199k1.pdf [file c8cy01199k1.pdf]

Electronic Supplementary Information (ESI) for:

---

## ***trans*-1,2-Diaminocyclohexane-based sulfonamides as effective hydrogen-bonding organocatalysts for asymmetric Michael-hemiacetalization reaction**

Maciej Dajek, Rafał Kowalczyk,\* and Przemysław J. Boratyński\*

Department of organic Chemistry, Wrocław University of Technology, Wyspiańskiego 27, Wrocław, 50-370 Poland  
tel. +4871-3203058, e-mail: [Rafal.kowalczyk@pwr.edu.pl](mailto:Rafal.kowalczyk@pwr.edu.pl); and [Przemyslaw.boratynski@pwr.wroc.pl](mailto:Przemyslaw.boratynski@pwr.wroc.pl)

---

### Table of Contents

|                                                                                |      |
|--------------------------------------------------------------------------------|------|
| Additional catalytic experiments .....                                         | S2   |
| NMR titration experiments.....                                                 | S4   |
| DFT computations for catalysts .....                                           | S7   |
| Determination of relative stereochemistry of end product <b>13</b> .....       | S11  |
| Experimental.....                                                              | S14  |
| General .....                                                                  | S14  |
| Catalysts.....                                                                 | S14  |
| Synthesis of primary-tertiary amines.....                                      | S14  |
| General procedure for the synthesis of sulfonamides <b>1-5</b> .....           | S15  |
| Piperidine catalysts <b>2</b> .....                                            | S15  |
| Catalysts <b>1</b> and <b>3-5</b> .....                                        | S27  |
| Catalysts <b>6-8</b> .....                                                     | S33  |
| General procedure for Michael-hemiacetalization reaction .....                 | S35  |
| Note on NMR and HPLC chromatograms of hemiacetal products <b>11</b> .....      | S36  |
| Catalytic products: .....                                                      | S36  |
| Plots of <sup>1</sup> H, <sup>13</sup> C, and <sup>19</sup> F NMR spectra..... | S41  |
| Chiral HPLC chromatograms .....                                                | S116 |
| DFT computations listings.....                                                 | S130 |

## Additional catalytic experiments

Table S1. Summary of results for the reaction of dimedone **10** and benzylidenepyruvate **9a** catalyzed by **2a** and *ent-2a*

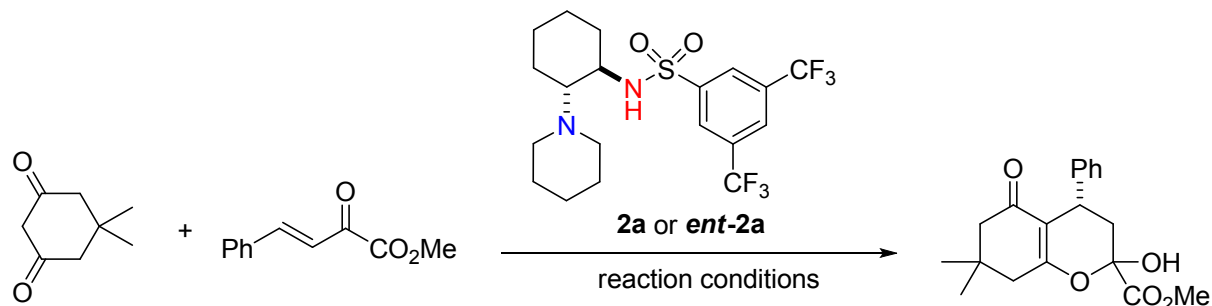

| Entry | Source data label | catalyst                      | Loading, % mol | solvent          | Time, h | Temp, °C | Scale, mmol | Ee, %                        | Yield, % <sup>a)</sup>   |
|-------|-------------------|-------------------------------|----------------|------------------|---------|----------|-------------|------------------------------|--------------------------|
| 1     | RK                | <b>2a</b>                     | 10             | toluene          | 20      | RT       | 0.1         | 93.2                         |                          |
| 2     | MD180             | <b>2a</b>                     | 10             | toluene          | 18      | RT       | 0.1         | 95.4                         |                          |
| 3     | MD139             | <i>ent-2a</i>                 | 10             | toluene          | 17      | RT       | 0.1         | 89.6 <sup>b)</sup>           |                          |
| 4     | MD140A            | <b>2a</b>                     | 10             | DCM              | 20      | RT       | 0.1         | 95.6                         |                          |
| 5     | MD179A            | <b>2a</b>                     | 1.0            | DCM              | 72      | -20      | 0.1         | 94.7                         |                          |
| 6     | MD140C            | <b>2a</b>                     | 10             | trifluorotoluene | 20      | RT       | 0.1         | 92.7                         |                          |
| 7     | MD140B            | <b>2a</b>                     | 10             | chlorobenzene    | 20      | RT       | 0.1         | 95.8                         |                          |
| 8     | MD158             | <i>crude 2a</i> <sup>c)</sup> | 10             | chlorobenzene    | 19      | RT       | 0.1         | 88.8                         |                          |
| 9     | MD186             | <i>crude 2a</i> <sup>d)</sup> | 10             | chlorobenzene    | 19      | RT       | 0.1         | 94.3                         |                          |
| 10    | MD145A            | <b>2a</b>                     | 5.0            | chlorobenzene    | 23      | RT       | 0.1         | 96.8                         |                          |
| 11    | MD145B            | <b>2a</b>                     | 2.5            | chlorobenzene    | 23      | RT       | 0.1         | 95.3                         |                          |
| 12    | MD145C            | <b>2a</b>                     | 1.0            | chlorobenzene    | 23      | RT       | 0.1         | 95.4                         |                          |
| 13    | MD150             | <b>2a</b>                     | 1.0            | chlorobenzene    | 46      | RT       | 3.0         | 87.8<br>(99.3) <sup>e)</sup> | 90<br>(43) <sup>e)</sup> |
| 14    | MD152             | <b>2a</b>                     | 1.0            | chlorobenzene    | 336     | -20      | 0.1         | 99.4                         |                          |
| 15    | MD159             | <b>2a</b>                     | 1.0            | chlorobenzene    | 120     | -20      | 3.0         | 99.3                         | 98                       |
| 16    | MD145D            | <b>2a</b>                     | 0.5            | chlorobenzene    | 23      | RT       | 0.1         | 93.7                         |                          |
| 17    | MD147A            | <b>2a</b>                     | 0.5            | chlorobenzene    | 96      | RT       | 0.1         | 91.6                         |                          |
| 18    | MD157             | <i>ent-2a</i>                 | 0.5            | chlorobenzene    | 44      | RT       | 0.1         | 91.4 <sup>b)</sup>           |                          |
| 19    | MD147B            | <b>2a</b>                     | 0.25           | chlorobenzene    | 96      | RT       | 0.1         | 93.5                         |                          |
| 20    | MD147C            | <b>2a</b>                     | 0.10           | chlorobenzene    | 96      | RT       | 0.1         | 86.8                         |                          |
| 21    | MD147D            | <b>2a</b>                     | 0.05           | chlorobenzene    | 96      | RT       | 0.1         | 66.7                         |                          |

a) Given yields are preparative, observed conversions for all reactions were high; b) Different major enantiomer was obtained; c) using catalyst sample that was neither washed in EtOAc with NaHCO<sub>3</sub> soln. nor previously recrystallized and contained ca. 13 %mol sulfonic acid triethylamine salt by NMR integration; d) using catalyst sample that was washed in EtOAc with NaHCO<sub>3</sub> soln. but not recrystallized; e) Values in parentheses were obtained after single recrystallization from *tert*-butyl methyl ether

Table S2. Summary of results for the reaction of dimedone **10** and benzylidenepyruvate **9a** catalyzed by **2c**

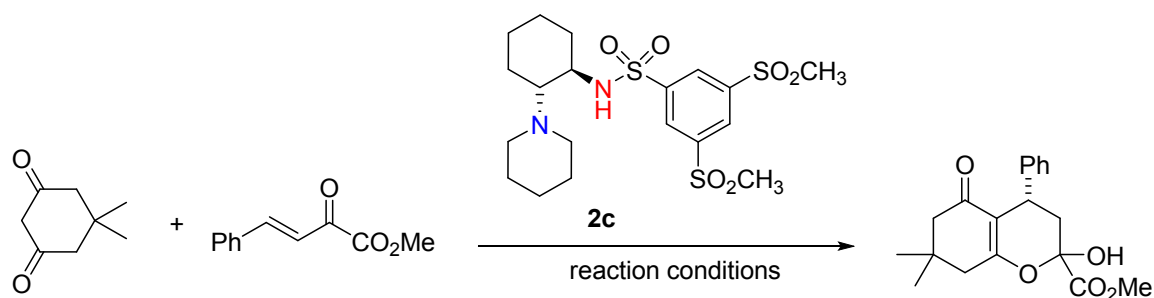

| Entry | Source data label | Loading, %mol | solvent          | Time, h | Temp, °C | Scale, mmol | Ee, % |
|-------|-------------------|---------------|------------------|---------|----------|-------------|-------|
| 1     | MD133             | 1.0           | toluene          | 26      | RT       | 0.1         | 83.9  |
| 2     | MD138A            | 1.0           | DCM              | 24      | RT       | 0.1         | 90.6  |
| 3     | MD138B            | 1.0           | chlorobenzene    | 24      | RT       | 0.1         | 93.6  |
| 4     | MD138C            | 1.0           | trifluorotoluene | 24      | RT       | 0.1         | 89.1  |
| 5     | MD149A            | 1.0           | chlorobenzene    | 22      | RT       | 0.1         | 86.4  |
| 6     | MD149B            | 0.5           | chlorobenzene    | 22      | RT       | 0.1         | 88.1  |

Table S3. Enantioselectivities obtained using matrix of catalysts **1-4** × **c,m,p,t** in the reaction of dimedone **10** and benzylidenepyruvate **9a**<sup>a)</sup>

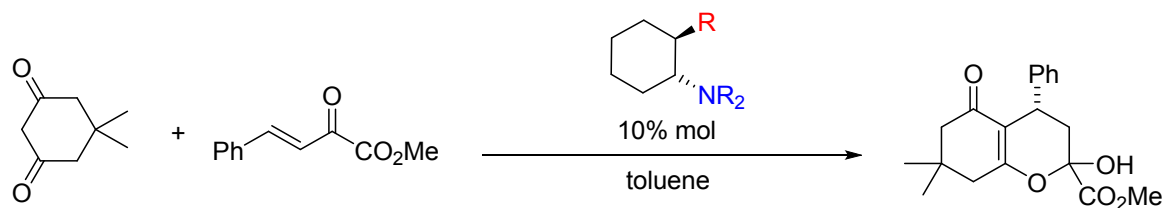

| <br><b>NR<sub>2</sub></b> =           | <b>R</b> =         |              |                  |              |
|---------------------------------------|--------------------|--------------|------------------|--------------|
|                                       | <br><b>c</b>       | <br><b>m</b> | <br><b>p</b>     | <br><b>t</b> |
| Enantioselectivities, % <sup>a)</sup> |                    |              |                  |              |
| <b>1</b>                              | nd <sup>c)</sup>   | 54.2         | nd <sup>c)</sup> | 76.4         |
| <b>2</b>                              | 93.6 <sup>b)</sup> | 55.6         | 39.2             | 77.6         |
| <b>3</b>                              | nd <sup>c)</sup>   | 33.4         | 21.8             | 66.8         |
| <b>4</b>                              | 88.7 <sup>b)</sup> | 29.6         | 9.6              | 46.6         |

a) Reaction conditions: 10 %mol catalyst in toluene at room temperature for 20 h; The experiments were run in parallel; b) Reactions run separately, and in chlorobenzene; c) Not determined, and the

synthesis of appropriate catalyst was not attempted. Note: the values shown here and those in Table 1 entries 15, 18, and 22 from the main text for **2m**, **2p**, and **2t** originate from different experiments

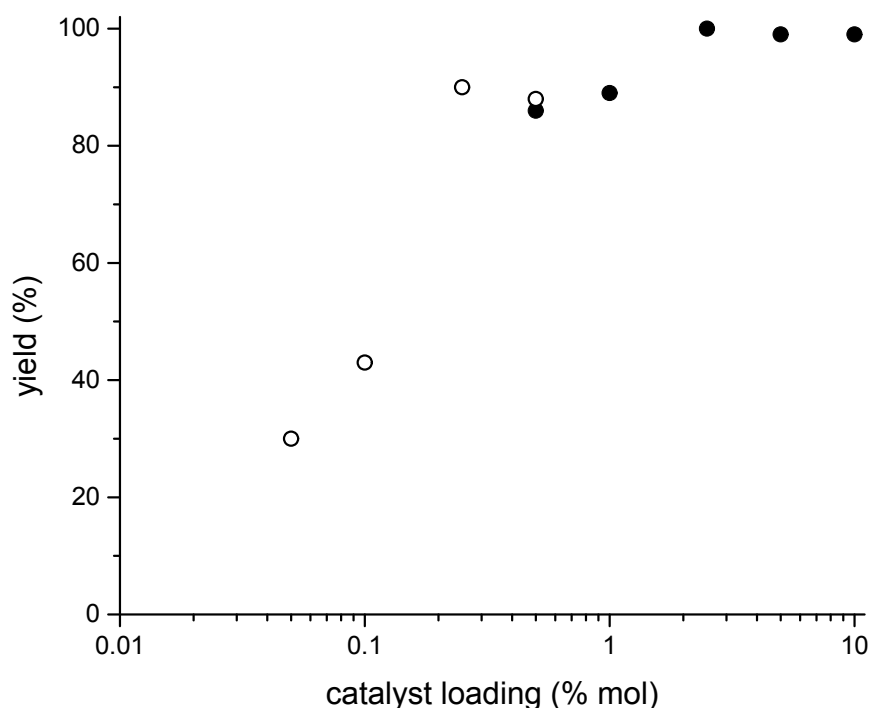

Figure S1. Effect of catalyst **2a** loading on the yield of product **11a** for reactions performed at room temperature in chlorobenzene for 24 h (●) and 96 h (○). The corresponding enantioselectivity values are shown in Figure 6 from the main text.

## NMR titration experiments

Samples of compound **2a** (12.7 mg, 28  $\mu\text{mol}$ ) were dissolved in  $\text{CDCl}_3$  (0.5 mL, 56 mM) and titrated separately with  $\text{CDCl}_3$  solutions of dimedone (**10**, 111 mM) and methyl benzylidenepyruvate (**9a**, 278 mM). Consecutive spectra taken after addition of 0.2 equiv aliquots of the reactants are shown in the following Figures S2-S4.

The titration experiment was expected to show interactions between the catalyst **2a**, which was supposed to act as an H-bond donor, and 1,2-dicarbonyl compound **9a**. Unfortunately this experiment failed to demonstrate such an interaction while it revealed no spectral changes (Figure S4). An additional part of this experiment was the titration with dimedone **10**. It again did not change any of the observed signals (Figure S3) apart from the single rather broad resonance (Figure S2). The  $\text{SO}_2\text{N-H}$  signal gradually shifted and merged with the OH signal corresponding to dimedone tautomer.

The observed spectral change is likely a consequence of acid-mediated exchange with dimedone as an acid source ( $\text{pK}_a$  5.2). The resonance attributed to NH increases in integration from the initial 0.51H



to nearly 1.35H after addition of 1 equiv of dimedone. This indicates a combined OH/NH signal of a dynamic system. Substantial protonation of the amine group in **2a** was not observed, since the adjacent NCH/CH<sub>2</sub> signals remained at their position throughout the titration.

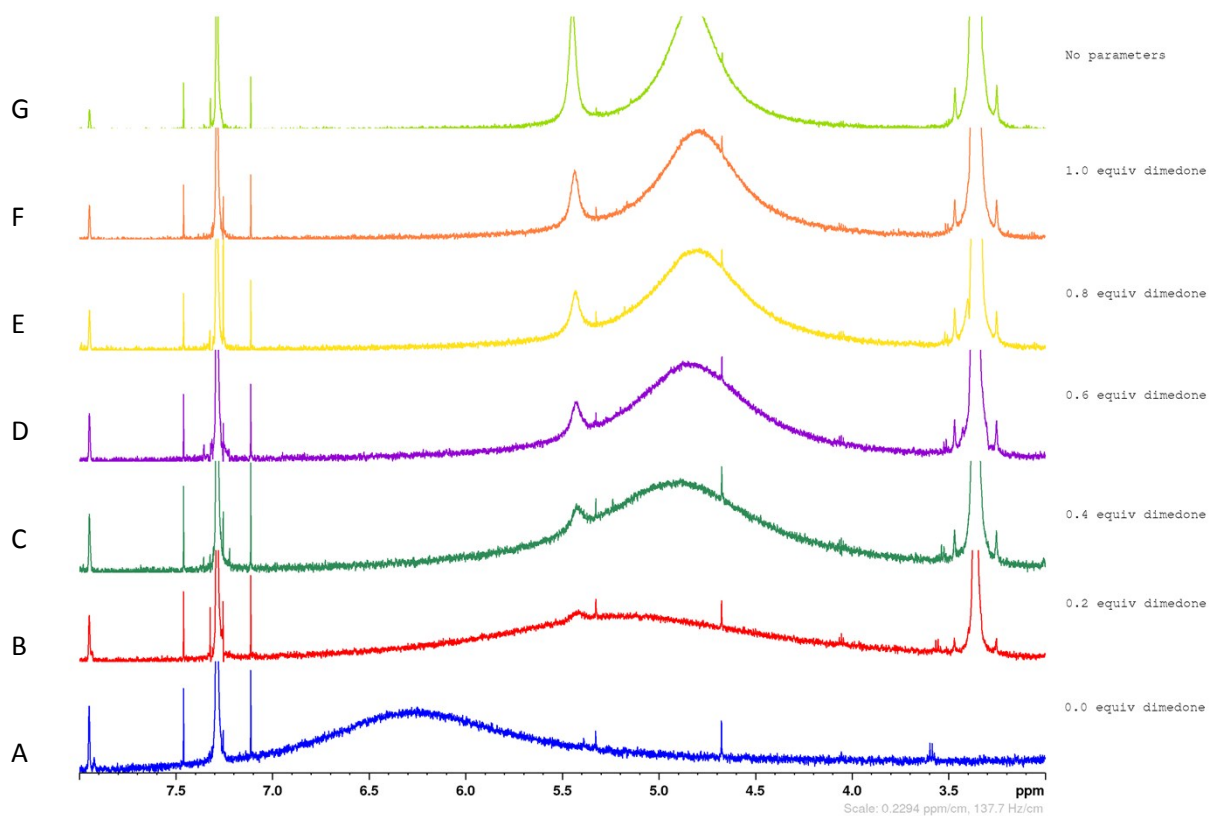

Figure S2. Plots of <sup>1</sup>H NMR spectra (600 MHz, CDCl<sub>3</sub>) in range of 8 to 3 ppm for titration of **2a** with dimedone (**10**): from bottom: a) no dimedone, b) 0.2 equiv c) 0.4 equiv, d) 0.6 equiv, e) 0.8 equiv, f) 1.0 equiv, and g) 2.0 equiv dimedone. In spectrum a) broad signal was assigned to sulfonamide NH. For full range spectra see the following Figure S3.

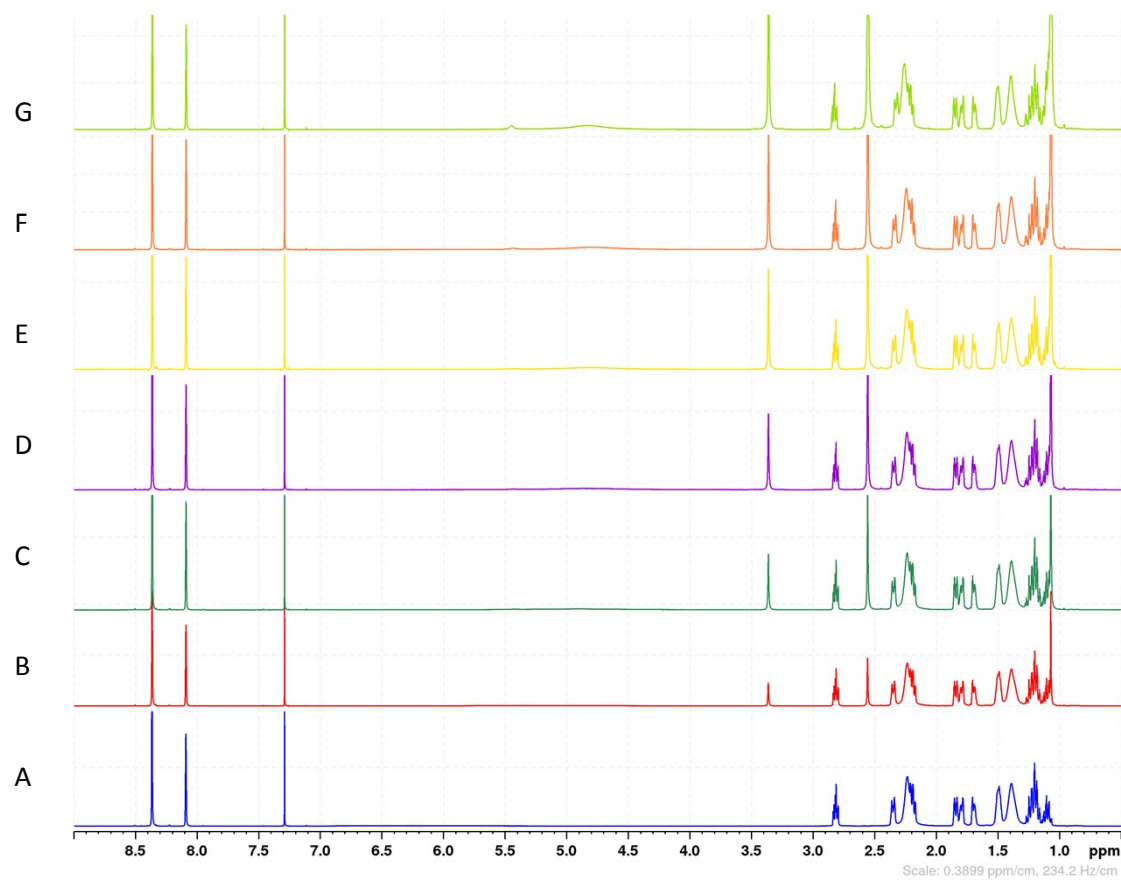

Figure S3. Plots of  $^1\text{H}$  NMR spectra (600 MHz,  $\text{CDCl}_3$ ) for titration of **2a** with dimedone (**10**): from bottom: a) no dimedone, b) 20 %mol dimedone, c) 40 %mol dimedone, d) 60 %mol dimedone, e) 80 %mol dimedone, f) 100 %mol dimedone, g) 150 %mol dimedone. For a magnified view of the broad signal at 4.5-6.5 ppm, see the preceding Figure S2.

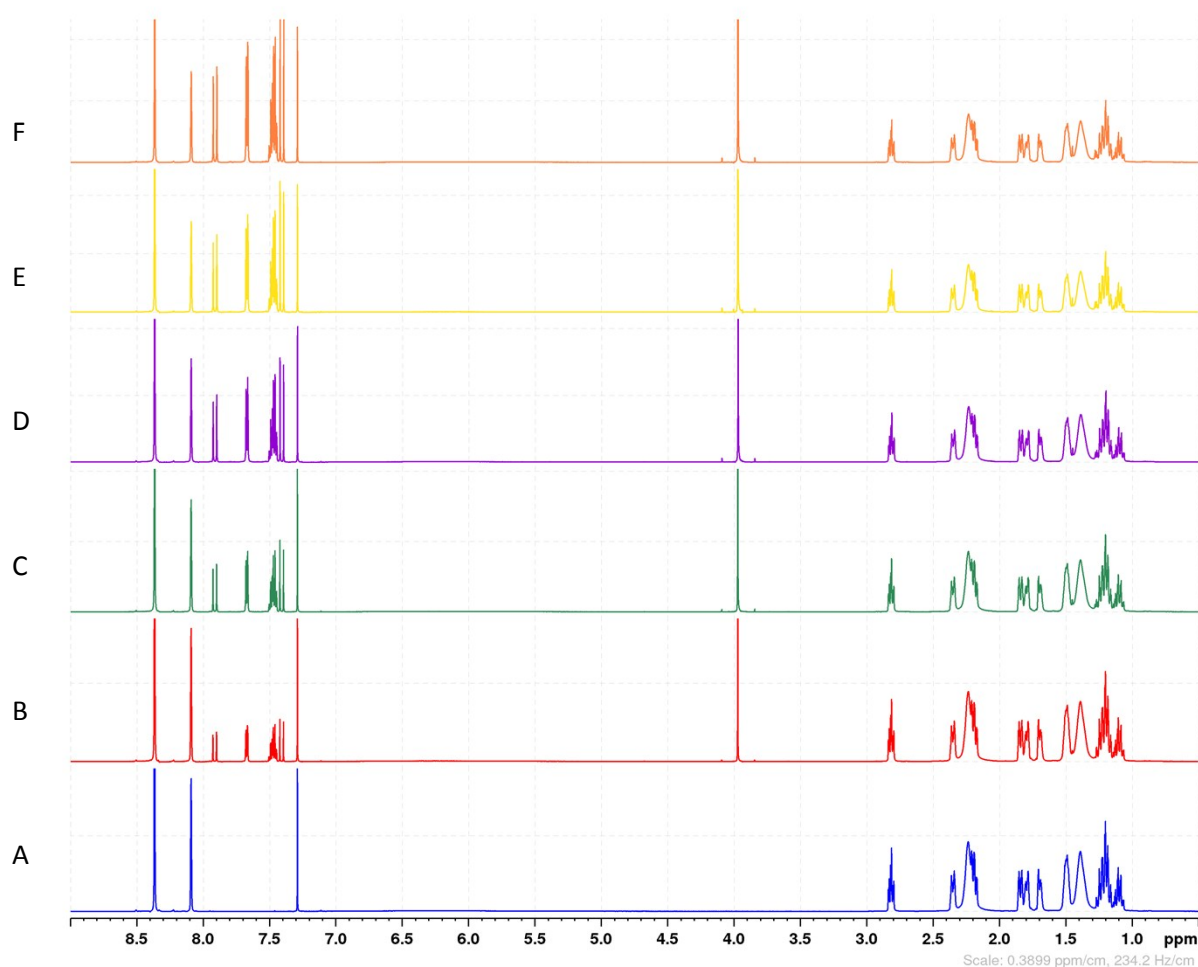

Figure S4. Plots of  $^1\text{H}$  NMR spectra (600 MHz,  $\text{CDCl}_3$ ) for titration of **2a** with methyl benzyldenepyruvate (acceptor **9a**) from bottom: a) no acceptor, b) 20 %mol acceptor, c) 40 %mol acceptor, d) 60 %mol acceptor, e) 80 %mol acceptor, f) 100 %mol acceptor.

### DFT computations for catalysts<sup>S1</sup>

For *N*-(1*R*,2*R*)-(2-pyrrolidin-1-yl)-cyclohexyl-benzenesulfonamide **1i** geometry was optimized at the DFT/B3LYP/CC-pVDZ level of theory<sup>S2</sup> in vacuum starting from initial geometries corresponding to rotations along major degrees of freedom, as well as different configurations of pyramidal N1 nitrogen atom. Selected geometries and their energies were listed in Table S4.

Table S4. Lowest energy conformations for **2i**, and their energies determined at the DFT/B3LYP/CC-pVDZ level of theory

| Conformation | N1 configuration | Dihedral angle, ° |           | E, hartree | Relative energy, kcal/mol |
|--------------|------------------|-------------------|-----------|------------|---------------------------|
|              |                  | C2-C1-N1-S        | C1-N1-S-C |            |                           |

|   |          |       |       |               |       |
|---|----------|-------|-------|---------------|-------|
| 1 | <i>R</i> | 138.8 | 95.4  | -1282.2759054 | 0.000 |
| 2 | <i>R</i> | 157.4 | -62.7 | -1282.2739087 | 1.253 |
| 3 | <i>S</i> | 133.8 | 69.9  | -1282.2680098 | 4.955 |
| 4 | <i>S</i> | 140.9 | 74.5  | -1282.2674033 | 5.335 |
| 5 | <i>S</i> | 81.0  | 139.4 | -1282.2666547 | 5.805 |
| 6 | <i>S</i> | -75.7 | -98.2 | -1282.2665644 | 5.862 |

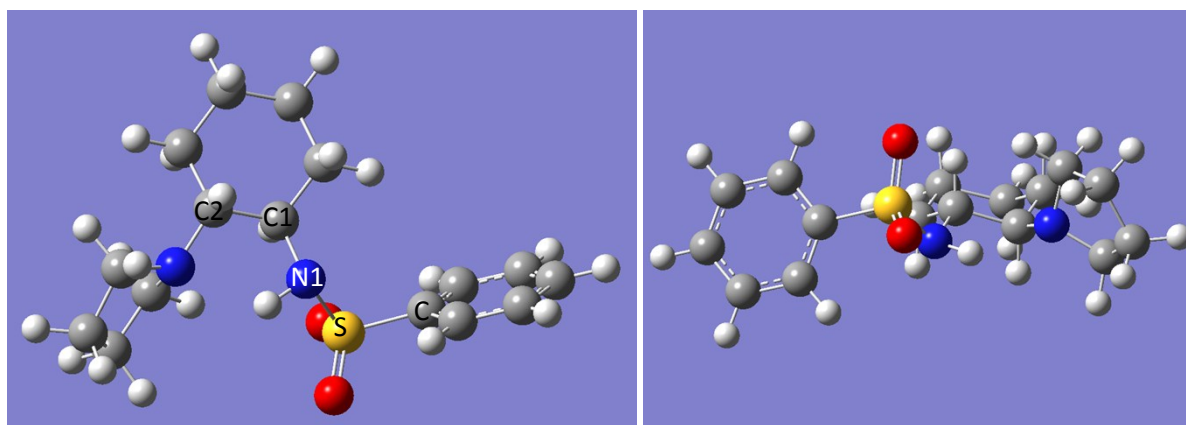

Figure S5. Projections of the lowest energy conformation (Conformation 1, Table S4) for **1i**.

Structures of different sulfonamide derivatives **1**, were optimized using the Conformation 1 Table S4 of **1i** as the initial input. All the geometries were optimized to local minima as confirmed by no imaginary frequencies. Table S5 lists some of molecular properties calculated for these conformations as well as highest vibration frequency corresponding mostly to N-H stretching IR band. These values were then taken to construct Figure 5 from the main text. Small experimental difference between compounds of type **1** and **2** justifies using simplified model.

<sup>S1</sup> We thank Wrocław Center for Networking and Supercomputing for allotment of computer time (No. 362)

<sup>S2</sup> Gaussian 16, Revision B.01, M. J. Frisch, G. W. Trucks, H. B. Schlegel, G. E. Scuseria, M. A. Robb, J. R. Cheeseman, G. Scalmani, V. Barone, G. A. Petersson, H. Nakatsuji, X. Li, M. Caricato, A. V. Marenich, J. Bloino, B. G. Janesko, R. Gomperts, B. Mennucci, H. P. Hratchian, J. V. Ortiz, A. F. Izmaylov, J. L. Sonnenberg, D. Williams-Young, F. Ding, F. Lipparini, F. Egidi, J. Goings, B. Peng, A. Petrone, T. Henderson, D. Ranasinghe, V. G. Zakrzewski, J. Gao, N. Rega, G. Zheng, W. Liang, M. Hada, M. Ehara, K. Toyota, R. Fukuda, J. Hasegawa, M. Ishida, T. Nakajima, Y. Honda, O. Kitao, H. Nakai, T. Vreven, K. Throssell, J. A. Montgomery, Jr., J. E. Peralta, F. Ogliaro, M. J. Bearpark, J. J. Heyd, E. N. Brothers, K. N. Kudin, V. N. Staroverov, T. A. Keith, R. Kobayashi, J. Normand, K. Raghavachari, A. P. Rendell, J. C. Burant, S. S. Iyengar, J. Tomasi, M. Cossi, J. M. Millam, M. Klene, C. Adamo, R. Cammi, J. W. Ochterski, R. L. Martin, K. Morokuma, O. Farkas, J. B. Foresman, and D. J. Fox, Gaussian, Inc., Wallingford CT, 2016.

Table S5. DFT calculated dipole moment, highest oscillation frequency and N-H bond length for sulfonamide structures **1a-y**.

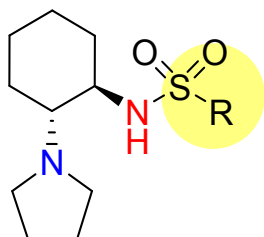

| Entry           | label     | R=                                                                  | Dipole moment, Debye | $\nu_{(N-H)}$ , $\text{cm}^{-1}$ | $d_{(N-H)}$ , Å    |
|-----------------|-----------|---------------------------------------------------------------------|----------------------|----------------------------------|--------------------|
| 1               | <b>1a</b> | 3,5-(CF <sub>3</sub> ) <sub>2</sub> C <sub>6</sub> H <sub>3</sub>   | 4.48                 | 3313.34                          | 1.03484            |
| 2 <sup>a)</sup> | <b>1b</b> | 3-FC <sub>6</sub> H <sub>4</sub>                                    | 4.01<br>3.93         | 3327.99<br>3329.46               | 1.03395<br>1.03388 |
| 3               | <b>1c</b> | 3,5-(MeSO <sub>2</sub> ) <sub>2</sub> C <sub>6</sub> H <sub>3</sub> | 11.09                | 3311.99                          | 1.03502            |
| 4               | <b>1d</b> | 3,5-F <sub>2</sub> C <sub>6</sub> H <sub>3</sub>                    | 3.99                 | 3324.56                          | 1.03413            |
| 5               | <b>1e</b> | 3,5-Cl <sub>2</sub> C <sub>6</sub> H <sub>3</sub>                   | 4.13                 | 3320.39                          | 1.03439            |
| 6               | <b>1f</b> | 4-CH <sub>3</sub> C <sub>6</sub> H <sub>4</sub>                     | 4.15                 | 3339.90                          | 1.03327            |
| 7               | <b>1g</b> | 3-NO <sub>2</sub> C <sub>6</sub> H <sub>4</sub>                     | 5.11                 | 3315.89                          | 1.03456            |
| 9               | <b>1h</b> | 4-NO <sub>2</sub> C <sub>6</sub> H <sub>4</sub>                     | 5.52                 | 3316.71                          | 1.03471            |
| 9               | <b>1i</b> | C <sub>6</sub> H <sub>5</sub>                                       | 3.92                 | 3335.08                          | 1.03365            |
| 10              | <b>1j</b> | 4-FC <sub>6</sub> H <sub>4</sub>                                    | 3.76                 | 3332.47                          | 1.03377            |
| 11              | <b>1k</b> | 3,5-(CH <sub>3</sub> ) <sub>2</sub> C <sub>6</sub> H <sub>3</sub>   | 4.01                 | 3337.32                          | 1.03319            |
| 12              | <b>1l</b> | 2-Naphthyl                                                          | 4.00                 | 3332.32                          | 1.03342            |
| 13              | <b>1m</b> | 2-FC <sub>6</sub> H <sub>4</sub>                                    | 3.82                 | 3350.61                          | 1.03232            |
| 14              | <b>1n</b> | 2,3,4-F <sub>3</sub> C <sub>6</sub> H <sub>2</sub>                  | 3.94                 | 3353.21                          | 1.03208            |
| 15              | <b>1o</b> | 2,4-F <sub>2</sub> C <sub>6</sub> H <sub>3</sub>                    | 3.66                 | 3343.25                          | 1.03287            |
| 16              | <b>1p</b> | C <sub>6</sub> F <sub>5</sub>                                       | 4.59                 | 3369.27                          | 1.03119            |
| 17              | <b>1q</b> | 8-quinolinyl                                                        | 5.19                 | 3326.86                          | 1.03435            |
| 18              | <b>1r</b> | 2,6-Cl <sub>2</sub> C <sub>6</sub> H <sub>3</sub>                   | 4.14                 | 3372.33                          | 1.03067            |
| 19              | <b>1s</b> | 2,4,6-( <i>i</i> Pr) <sub>2</sub> C <sub>6</sub> H <sub>3</sub>     | 3.76                 | 3319.23                          | 1.03462            |
| 20              | <b>1t</b> | CH <sub>3</sub>                                                     | 3.57                 | 3332.96                          | 1.03334            |
| 21              | <b>1u</b> | CF <sub>3</sub>                                                     | 5.04                 | 3345.90                          | 1.03253            |
| 22              | <b>1v</b> | cyclohexyl                                                          | 3.28                 | 3344.14                          | 1.03273            |
| 23              | <b>1w</b> | benzene-1,3-diyl                                                    | 0.06                 | 3333.08                          | 1.03365            |
| 24              | <b>1x</b> | biphenyl-4,4'-diyl                                                  | 3.21                 | 3328.37                          | 1.03409            |
| 25              | <b>1y</b> | sulfamide                                                           | 2.58                 | 3352.88                          | 1.03249            |

a) Two orientations of 3-fluorophenyl ring were considered giving almost equal energy

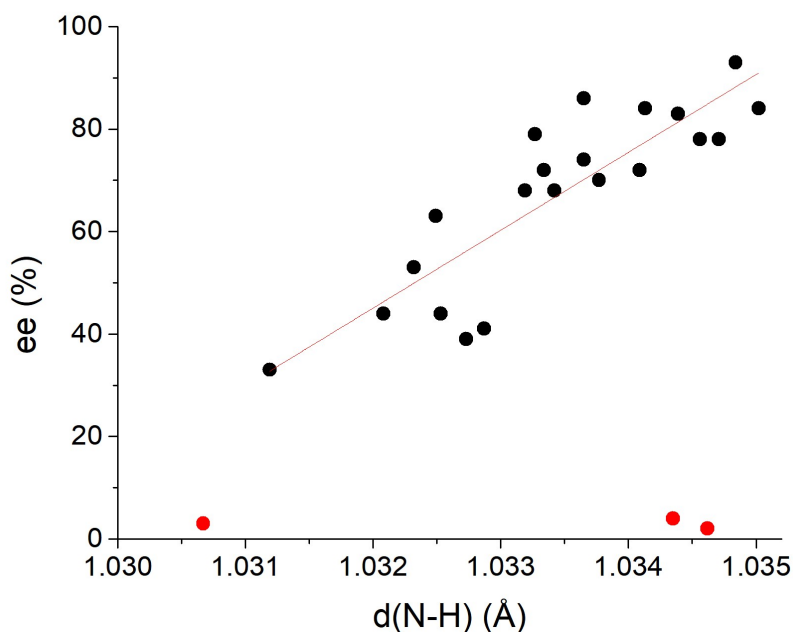

Figure S6. Correlation of experimental enantioselectivities for **11a** obtained in reaction of dimedone (**10**) with methyl benzylidenepyruvate (**9a**) (in toluene at room temperature, 10 %mol catalyst) with DFT calculated N-H distance in the catalysts. Pearson correlation coefficient was 0.863. Points corresponding to experiments where nearly racemic samples were obtained were excluded from the fit (red).

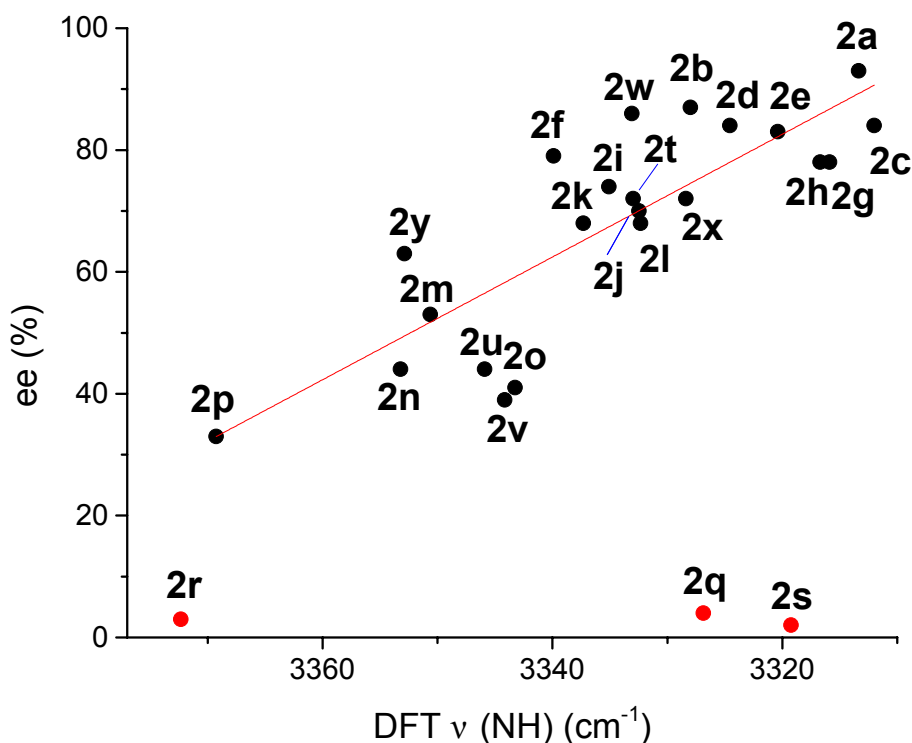

Figure S7. Correlation between enantiomeric excess for reaction of dimedone (**10**) with methyl benzylidenepyruvate (**9a**) (in toluene at room temperature, 10 %mol catalyst) and DFT calculated unscaled frequency of the N-H stretching band. The Pearson coefficient for the fitted line is  $-0.83$ . Results for 2,6-disubstituted benzenesulfonates and quinoline sulfonamide providing nearly racemic products were excluded from the fit (marked in red). This is a magnified version of Figure 5 from the main text with points associated with catalyst labels.

## Determination of relative stereochemistry of end product **13**

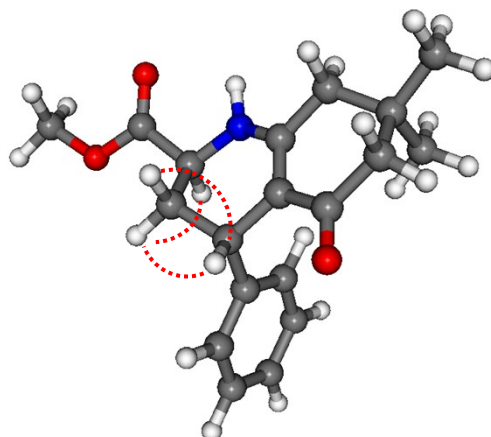

Figure S8. Lowest energy diastereomer of **13** determined at the DFT/B3LYP/CC-pVDZ level of theory. Dashed lines indicate contacts of less than 2.58 Å within the tetrahydropyridine unit and observed NOESY interactions. For plot of NOESY experiment see the following Figure S9.

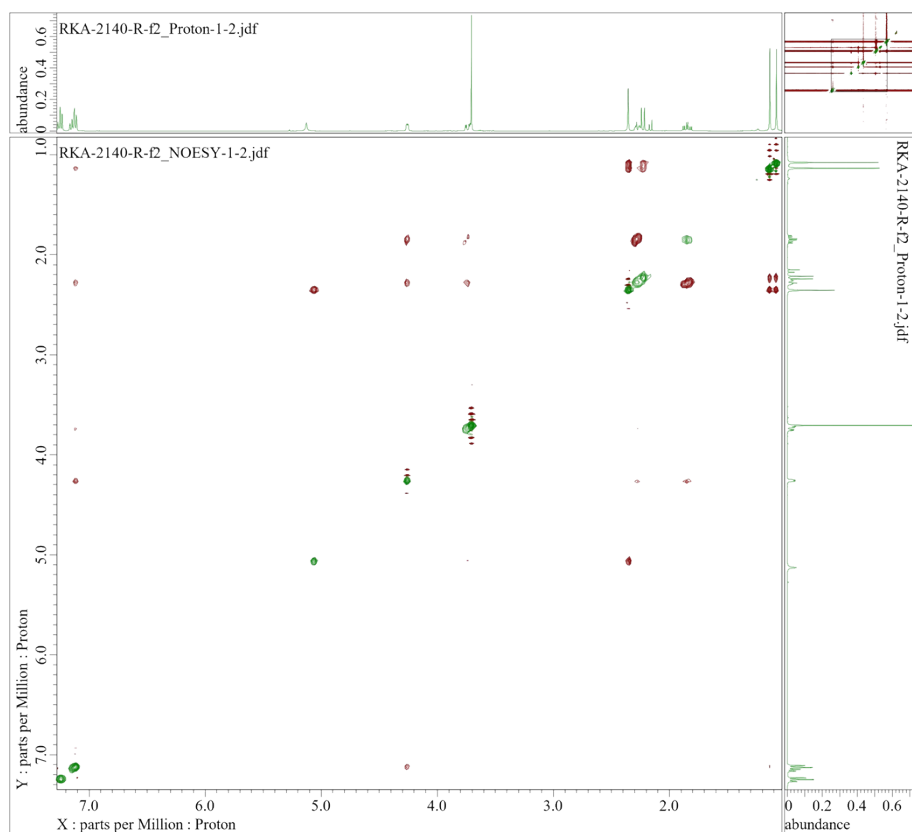

Figure S9. NOESY experiment (400 MHz, CDCl<sub>3</sub>) for **13**. For interpretation refer to the preceding Figure S8.

Table S6. Comparison of DFT computed and scaled chemical shifts for two possible diastereomers of **13** and experimental data<sup>a)</sup>

| Atom, signal             | DFT chemical shift, ppm <sup>a)</sup> |                                  | Experiment, ppm <sup>b)</sup> |
|--------------------------|---------------------------------------|----------------------------------|-------------------------------|
|                          | Like (2 <i>S</i> ,4 <i>S</i> )        | Unlike (2 <i>R</i> ,4 <i>S</i> ) |                               |
| Carbon, <sup>13</sup> C  |                                       |                                  |                               |
| C-2                      | 51.68                                 | 55.32                            | 49.82                         |
| C-3                      | 34.34                                 | 37.78                            | 32.53                         |
| C-4a                     | 107.53                                | 111.37                           | 105.76                        |
| C-4                      | 38.78                                 | 40.65                            | 34.40                         |
| C-5                      | 189.66                                | 190.70                           | 193.31                        |
| C-6                      | 50.48                                 | 52.36                            | 50.54                         |
| C-7                      | 36.50                                 | 38.45                            | 32.57                         |
| C-8                      | 43.05                                 | 44.73                            | 43.07                         |
| C-8a                     | 157.22                                | 158.95                           | 155.84                        |
| 7-CH <sub>3</sub> (a)    | 25.28                                 | 25.01                            | 28.44                         |
| 7-CH <sub>3</sub> (b)    | 31.18                                 | 31.11                            | 28.78                         |
| CO <sub>2</sub>          | 175.93                                | 174.94                           | 172.76                        |
| OMe                      | 53.37                                 | 53.27                            | 52.59                         |
| <i>C-ipso</i>            | 148.42                                | 150.31                           | 145.08                        |
| <i>C-ortho</i>           | 128.95                                | 127.78                           | 128.40                        |
| <i>C-meta</i>            | 128.52                                | 128.41                           | 127.80                        |
| <i>C-para</i>            | 126.39                                | 125.32                           | 126.28                        |
| <b>RMSD<sup>c)</sup></b> | <b>2.40</b>                           | <b>3.73</b>                      |                               |
| Proton                   |                                       |                                  |                               |
| H-2                      | 4.054                                 | 4.159                            | 3.755                         |
| H-3a                     | 2.250                                 | 2.763                            | 2.291                         |
| H-3b                     | 1.889                                 | 1.943                            | 1.862                         |
| H-4                      | 4.356                                 | 3.791                            | 4.275                         |
| H-6a                     | 2.186                                 | 2.021                            | 2.16 – 2.38                   |
| H-6b                     | 2.384                                 | 2.375                            | 2.16 – 2.38                   |
| H-8a                     | 2.806                                 | 2.973                            | 2.356                         |
| H-8b                     | 2.314                                 | 2.105                            | 2.356                         |
| 7-CH <sub>3</sub> (a)    | 1.327                                 | 1.199                            | 1.094                         |
| 7-CH <sub>3</sub> (b)    | 1.318                                 | 1.288                            | 1.151                         |
| OMe                      | 3.765                                 | 3.795                            | 3.723                         |
| <i>ortho</i>             | 6.562                                 | 6.408                            | 7.135                         |
| <i>meta</i>              | 6.184                                 | 6.139                            | 7.268                         |
| <i>para</i>              | 7.306                                 | 7.205                            | 7.163                         |
| NH                       | 5.056                                 | 4.708                            | 5.145                         |
| <b>RMSD<sup>c)</sup></b> | <b>0.384</b>                          | <b>0.488</b>                     |                               |

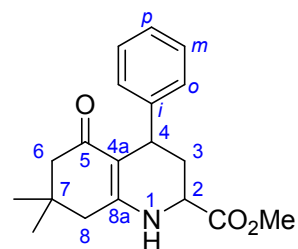

Atom numbering scheme for **13**

<sup>a)</sup> Geometries were optimized at the DFT/B3LYP/CC-pVDZ level of theory in vacuum,<sup>S2</sup> two conformers were considered for each diastereomer (2*S*,4*S* and 2*S*,4*R*) and their contribution was Boltzmann averaged. Isotropic shieldings were calculated at the mPW1PW91/6-311+G(2d,p) level of theory using chloroform universal solvent model (SMD) and following



scaling factors were taken from <http://cheshirenmr.info/ScalingFactors.htm>:  $^1\text{H}$  slope:  $-1.0933$ , intercept:  $31.9088$ ;  $^{13}\text{C}$  slope:  $-1.0449$ , intercept:  $187.1018$  as reported by Tantillo *et al.*<sup>S3</sup>

b) The assignment of NMR signals was made based on HSQC and NOESY experiments (Figures S9 and S10)

c) Root mean square deviation between the experimental and theoretical data (ppm). Lower value indicates better agreement of data. Unresolved signals of 6- $\text{CH}_2$  were not included in calculation of RMSD. For comparison, RMSD values obtained by Tantillo *et al.* on a probe set were  $0.160$  and  $2.60$  ppm for  $^1\text{H}$  and  $^{13}\text{C}$ .<sup>S3</sup>

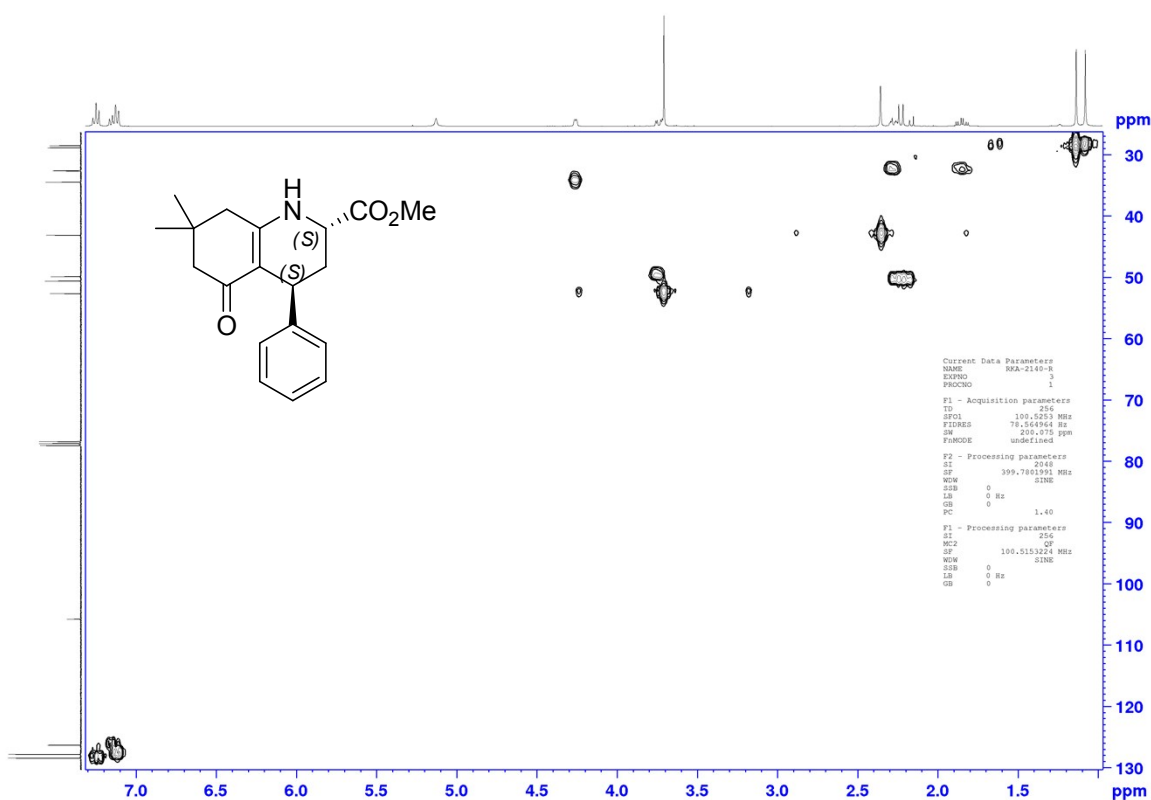

Figure S10.  $^1\text{H}$ ,  $^{13}\text{C}$  HSQC experiment (400, 101 MHz) for **13**.

<sup>S3</sup> Lodewyk, M. W.; Siebert, M. R.; Tantillo, D. J. *Chem. Rev.* **2012**, *112*, 1839-1862

## Experimental

### General

Enantiomeric 1,2-*trans*-diaminocyclohexanes (DACH) were obtained by crystallization of tartaric acid salts with L-tartaric acid and D-tartaric acid for 1*R*,2*R* and 1*S*,2*S* isomers, respectively according to the literature procedure.<sup>S4</sup> The salts were triple recrystallized from water, and liberated diamines were distilled before use. Mono Boc-DACH was obtained according to a literature procedure.<sup>S5</sup> 2-Oxo-butenates were prepared according to literature procedures.<sup>S6</sup>

Sulfonyl chlorides and triflic anhydride were purchased from commercial suppliers and used as received.

### Catalysts

#### Synthesis of primary-tertiary amines

Mono Boc protected enantiomeric 1,2-*trans*-diaminocyclohexane (22.66 g, 106 mmol, 1.0 equiv) was dissolved in MeCN (220 mL), and K<sub>2</sub>CO<sub>3</sub> (74.5 g, 539 mmol, 5.1 equiv) and dihalide (36.84 g, 160 mmol, 1.5 equiv) were added. The suspension was stirred at rt for 24 h then at 80 °C for 24-48 h, and cooled to room temperature. The mixture was filtered and the solids were washed with MeCN and combined filtrates were concentrated *in vacuo*. The residue was suspended in 6.5M aqueous HCl (117 mL) with vigorous stirring while evolution of gas was observed. After 12 h, the mixture was washed with diethyl ether (2 × 70 mL) to remove excess of dihalide. The aqueous phase was cooled to 0 °C and carefully alkalinized with solid NaOH. The product was extracted with dichloromethane (4 × 30 mL), dried over Na<sub>2</sub>SO<sub>4</sub>, evaporated and vacuum distilled in kugelrohr to produce clear colorless liquids / low-melting solids. See Table S7 below.

---

<sup>S4</sup> (a) Guo, C.; Qiu, J.; Zhang, X.; Verdugo, D.; Larter, M. L.; Christie, R.; Kenney, P.; Walsh, P. J. *Tetrahedron*, **1997**, *53*, 4145; (b) Jaeger, F. M.; Bijkerk, L. *Z. Anorg. Allg. Chem.* **1937**, *233*, 97.

<sup>S5</sup> Darwish, M. O.; Wallace, A.; Clakrson, G. J.; Wills, M. *Tetrahedron Lett.* **2013**, *54*, 4250-4253.

<sup>S6</sup> (a) Feng, J.; Fu, X.; Chen, Z.; Lin, L.; Liu, X.; Feng, X. *Org. Lett.* **2013**, *15*, 2640-2643; (b) Huw, Y.-Z.; Liu, M.-M.; Huang, P.-J.; Song, X.; Wang, M. C.; Chankg, J.-B. *Chem. Eur. J.* **2015**, *21*, 11994-11998.

Table S7.

| Entry           | Product                                                                           | Distillation conditions:<br>oven temp / pressure | Reaction scale      | Yield, %                  |
|-----------------|-----------------------------------------------------------------------------------|--------------------------------------------------|---------------------|---------------------------|
| 1 <sup>a)</sup> | 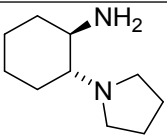 | 100 °C / 0.5 mmHg                                | 65 mmol             | 70                        |
| 2 <sup>b)</sup> |  | 110 °C / 0.5 mmHg                                | 65 mmol<br>106 mmol | 86<br>86<br>(mp. 19-21°C) |
| 3 <sup>c)</sup> |  | 125°C / 0.07 mmHg                                | 1.4 mmol<br>20 mmol | 50<br>44                  |
| 4 <sup>d)</sup> |  | 130 °C / 0.5 mmHg                                | 40 mmol             | 70                        |

Dihalide used: <sup>a)</sup> 1,4-dibromobutane, <sup>b)</sup> 1,5-dibromopentane, <sup>c)</sup> 1,6-diiodohexane, <sup>d)</sup> di(2-bromoethyl) ether

General procedure for the synthesis of sulfonamides **1-5**

Primary-tertiary diamine (2.00 mmol, 1.0 equiv, 0.365 g for 2-piperidine-cyclohexylamine) was dissolved in dichloromethane (20 mL), and triethylamine (3.00 mmol, 0.42 mL, 1.5 equiv) was added followed by the respective sulfonyl chloride (2.20 mmol, 1.1 equiv). The mixture was stirred at room temperature for 12 h. Then aqueous NaHCO<sub>3</sub> (10%, 10 mL) was added and the mixture extracted with dichloromethane (2 × 10 mL). The extracts were evaporated, redissolved in ethyl acetate (20 mL), and washed with aqueous NaHCO<sub>3</sub> (2 × 10 mL). The solution was dried over Na<sub>2</sub>SO<sub>4</sub>, and concentrated *in vacuo* giving products in nearly quantitative yields. Solid products were then recrystallized usually from 2-propanol in various yields.

Piperidine catalysts **2**

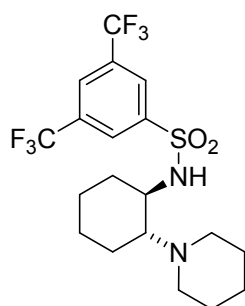

***N*-((1*R*,2*R*)-2-(Piperidin-1-yl)cyclohexyl)-3,5-**

**bis(trifluoromethyl)benzenesulfonamide, 2a.** According to the general procedure using 0.575 g (3.15 mmol, 1.0 equiv) of (1*R*,2*R*)-2-(1-piperidinyl)cyclohexylamine and 1.08 g (3.46 mmol, 1.1 equiv) of 3,5-bis(trifluoromethyl)benzenesulfonyl chloride, 1.40 g of product was obtained as pale solid (97%). After recrystallization from 2-propanol 1.04 g of white solid was received (72% yield).

Mp 111.5-112 °C (2-propanol) (for **ent-2a** lit.<sup>S7</sup> mp. 110-111 °C);  $[\alpha]_{\text{D}}^{22} = -71.6$  ( $c$  1, CH<sub>2</sub>Cl<sub>2</sub>), (for **ent-2a** lit.  $[\alpha]_{\text{D}}^{22} +60.1$  ( $c$  1.39, CHCl<sub>3</sub>)<sup>S7</sup>); <sup>1</sup>H NMR (600 MHz, CDCl<sub>3</sub>, TMS)  $\delta$  8.34 (s, 2H), 8.06 (s, 1H), 6.3 (br., 1H), 2.79 (td,  $J = 10.2, 3.7$  Hz, 1H), 2.30 – 2.35 (m, 1H), 2.12 – 2.26 (m, 5H), 1.79 – 1.84 (m, 1H), 1.74 – 1.78 (m, 1H), 1.65 – 1.69 (m, 1H), 1.44 – 1.50 (m, 2H), 1.36 (br. 4H), 1.13 – 1.24 (m, 3H), 1.03 – 1.11 (m, 1H); <sup>13</sup>C NMR (151 MHz, CDCl<sub>3</sub>)  $\delta$  143.4, 132.8 (q,  $J_{\text{C-F}} = 34.4$  Hz), 127.4 (q,  $J_{\text{C-F}} = 7.7$  Hz), 126.0 (sept.,  $J_{\text{C-F}} = 3.4$  Hz), 122.5 (q,  $J_{\text{C-F}} = 273.2$  Hz), 67.3, 53.8, 49.0, 32.5, 26.4, 25.2, 24.5, 24.1, 22.8; <sup>19</sup>F NMR (376 MHz, CDCl<sub>3</sub>)  $\delta$  -62.82 (s, 6H);

***N*-((1*S*,2*S*)-2-(Piperidin-1-yl)cyclohexyl)-3,5-bis(trifluoromethyl)benzenesulfonamide, *ent*-2a.<sup>S7</sup>**

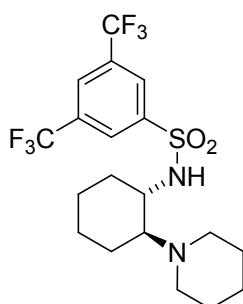

According to the general procedure using 0.174 g (0.956 mmol, 1.0 equiv) of (1*S*,2*S*)-2-(1-piperidinyl)cyclohexylamine and 0.329 g (1.05 mmol, 1.1 equiv) of 3,5-bis(trifluoromethyl)benzenesulfonyl chloride, 0.247 g of product was obtained after recrystallization from 2-propanol as white solid (56% yield).

Mp 110.5-112 °C (2-propanol). (lit.<sup>S7</sup> mp 110-111 °C);  $[\alpha]_{\text{D}}^{21} = +72.9$  ( $c$  1, CH<sub>2</sub>Cl<sub>2</sub>) (lit.<sup>S7</sup>  $[\alpha]_{\text{D}}^{22} +60.1$  ( $c$  1.39, CHCl<sub>3</sub>)).

***N*-((1*R*,2*R*)-2-(Piperidin-1-yl)cyclohexyl)-3-fluorobenzenesulfonamide, 2b**

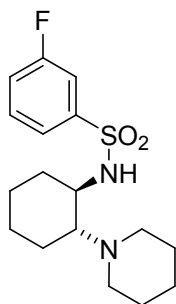

According to the general procedure using 0.364 g (2.00 mmol, 1.0 equiv) of (1*R*,2*R*)-2-(1-piperidinyl)cyclohexylamine and 0.290 mL (2.18 mmol, 1.1 equiv) of 3-fluorobenzenesulfonyl chloride, 0.435 g of product was obtained after recrystallization from 2-propanol as pale orange solid (64% yield).

mp 78.5 – 80.5 °C (2-propanol);  $[\alpha]_{\text{D}}^{21} = -109$  ( $c$  0.996, CH<sub>2</sub>Cl<sub>2</sub>); <sup>1</sup>H NMR (600 MHz, CDCl<sub>3</sub>, TMS)  $\delta$  7.68 – 7.70 (m, 1H), 7.60 (dt,  $J = 8.1, 2.0$  Hz, 1H), 7.51 (td,  $J = 8.0, 5.3$  Hz, 1H), 7.27 (td,  $J = 8.0, 2.2$  Hz, 1H), 6.25 (br., 1H), 2.68 (td,  $J = 10.5, 3.7$  Hz, 1H), 2.41 – 2.46 (m, 1H), 2.05 – 2.19 (m, 5H), 1.73 – 1.81 (m, 2H), 1.64 – 1.68 (m, 1H), 1.43 (br., 2H), 1.35 (br., 4H), 1.10 – 1.29 (m, 3H), 1.00 – 1.06 (m, 1H); <sup>13</sup>C NMR (151 MHz, CDCl<sub>3</sub>)  $\delta$  162.4 (d,  $J_{\text{C-F}} = 252$  Hz), 141.9 (d,  $J_{\text{C-F}} = 6.6$  Hz), 130.7 (d,  $J_{\text{C-F}} = 7.7$  Hz), 123.0 (d,  $J_{\text{C-F}} = 3.3$  Hz), 119.6 (d,  $J_{\text{C-F}} = 21.2$  Hz), 114.6 (d,  $J_{\text{C-F}} = 24.1$  Hz), 67.4, 53.5, 49.1, 32.7, 26.5, 25.3, 24.5, 24.2, 22.7; <sup>19</sup>F NMR (376 MHz, CDCl<sub>3</sub>)  $\delta$  -109.71 (td,  $J_{\text{F-H}} = 8.2, 5.3$  Hz); FT-IR (ATR)  $\nu$  3162, 2937, 1347, 1217, 1155 (S=O), 712, 586 cm<sup>-1</sup>; HRMS (ESI-TOF) calcd. for [C<sub>17</sub>H<sub>25</sub>FN<sub>2</sub>O<sub>2</sub>S+H]<sup>+</sup> 341.1694 found 341.1698

<sup>S7</sup> Schmitt, E.; Schiffers, I.; Bolm, C. *Tetrahedron* **2010**, *66*, 6349-6357. (Ref. 4b from the main text)

***N*-((1*R*,2*R*)-2-(Piperidin-1-yl)cyclohexyl)-3,5-di(methylsulfonyl)benzenesulfonamide, 2c**

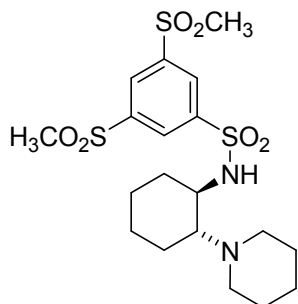

According to the general procedure using 0.182 g (0.998 mmol, 1.0 equiv) of (1*R*,2*R*)-2-(1-piperidinyl)cyclohexylamine and 0.366 g (1.10 mmol, 1.1 equiv) of 3,5-bis(methylsulfonyl)benzenesulfonyl chloride, 0.331 g of product was obtained after recrystallization from 2-propanol as pale orange solid (69% yield).

mp 206.5 – 209.0 °C (2-propanol);  $[\alpha]_D^{21} = -66.7$  (*c* 0.384, CH<sub>2</sub>Cl<sub>2</sub>); <sup>1</sup>H NMR (600 MHz, CDCl<sub>3</sub>, TMS) δ 8.69 – 8.70 (m, 2H), 8.67 (t, *J* = 1.5 Hz, 1H), 5.52 (br., 1H), 3.18 (s, 6H), 2.95 – 3.00 (m, 1H), 2.30 – 2.36 (m, 2H), 2.15 – 2.27 (m, 4H), 1.81 – 1.85 (m, 1H), 1.77 (d, *J* = 5.9 Hz, 1H), 1.63 – 1.67 (m, 1H), 1.48 – 1.54 (m, 2H), 1.39 (br., 4H), 1.09 – 1.21 (m, 4H); <sup>13</sup>C NMR (151 MHz, CDCl<sub>3</sub>) δ 145.2, 143.6, 130.6, 129.8, 67.3, 54.0, 49.1, 44.3, 32.5, 26.5, 25.2, 24.5, 24.1, 22.8; FT-IR (ATR) ν 3133, 3063, 2928, 1310 (S=O), 1144 (S=O), 964, 812 cm<sup>-1</sup>; HRMS (ESI-TOF) calcd. for [C<sub>19</sub>H<sub>30</sub>N<sub>2</sub>O<sub>6</sub>S<sub>3</sub>+H]<sup>+</sup> 479.1339 found 479.1344

***N*-((1*R*,2*R*)-2-(Piperidin-1-yl)cyclohexyl)-3,5-difluorobenzenesulfonamide, 2d**

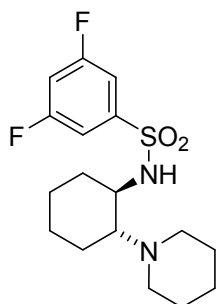

According to the general procedure using 0.364 g (2.00 mmol, 1.0 equiv) of (1*R*,2*R*)-2-(1-piperidinyl)cyclohexylamine and 0.469 g (2.21 mmol, 1.1 equiv) of 3,5-difluorobenzenesulfonyl chloride, 0.279 g of product was obtained after recrystallization from 2-propanol as white solid (39% yield).

mp 72.0 – 74.0 °C (2-propanol);  $[\alpha]_D^{20} = -103.6$  (*c* 1.01, CH<sub>2</sub>Cl<sub>2</sub>); <sup>1</sup>H NMR (600 MHz, CDCl<sub>3</sub>, TMS) δ 7.41 – 7.45 (m, 2H), 7.02 (tt, *J* = 8.4, 2.3 Hz, 1H), 6.26 (br., 1H), 2.72 (td, *J* = 10.5, 3.8 Hz, 1H), 2.38 – 2.42 (m, 1H), 2.12 – 2.22 (m, 5H), 1.74 – 1.83 (m, 2H), 1.65 – 1.69 (m, 1H), 1.43 – 1.50 (m, 2H), 1.38 (br., 4H), 1.12 – 1.29 (m, 3H), 1.03 – 1.10 (m, 1H); <sup>13</sup>C NMR (151 MHz, CDCl<sub>3</sub>) δ 162.8 (dd, *J*<sub>C-F</sub> = 255, 11 Hz), 143.4 (t, *J*<sub>C-F</sub> = 8.1 Hz), 110.8 (dd, *J* = 21.6, 6.3 Hz), 108.0 (t, *J*<sub>C-F</sub> = 25 Hz), 67.4, 53.6, 48.9, 32.7, 26.4, 25.3, 24.5, 24.1, 22.7; <sup>19</sup>F NMR (376 MHz, CDCl<sub>3</sub>) δ -105.71 – (-105.64) (m, 2F); FT-IR (ATR) ν 3132 (N-H), 2933, 1602 (N-H), 1351 (S=O), 1160 (S=O), 986 cm<sup>-1</sup>; HRMS (ESI-TOF) calcd. for [C<sub>17</sub>H<sub>24</sub>F<sub>2</sub>N<sub>2</sub>O<sub>2</sub>S+H]<sup>+</sup> 359.1599 found 359.1609

***N*-((1*R*,2*R*)-2-(Piperidin-1-yl)cyclohexyl)-3,5-dichlorobenzenesulfonamide, 2e**

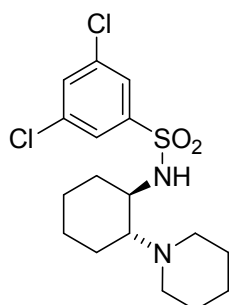

According to the general procedure using 0.364 g (2.00 mmol, 1.0 equiv) of (1*R*,2*R*)-2-(1-piperidinyl)cyclohexylamine and 0.559 g (2.28 mmol, 1.1 equiv)

of 3,5-dichlorobenzenesulfonyl chloride, 0.744 g of product was obtained after recrystallization from 2-propanol as pale yellow solid (95% yield).

mp 147.7 – 149.2 °C (2-propanol);  $[\alpha]_D^{21} = -110.8$  ( $c$  1.00,  $\text{CH}_2\text{Cl}_2$ );  $^1\text{H NMR}$  (600 MHz,  $\text{CDCl}_3$ , TMS)  $\delta$  7.76 – 7.77 (m, 2H), 7.54 – 7.55 (m, 1H), 6.31 (br., 1H), 2.68 (td,  $J = 10.5, 4.0$  Hz, 1H), 2.37 – 2.42 (m, 1H), 2.12 – 2.23 (m, 5H), 1.74 – 1.83 (m, 2H), 1.65 – 1.69 (m, 1H), 1.45 – 1.53 (m, 2H), 1.39 (br., 4H), 1.12 – 1.28 (m, 3H), 1.03 – 1.10 (m, 1H);  $^{13}\text{C NMR}$  (151 MHz,  $\text{CDCl}_3$ )  $\delta$  142.9, 135.9, 132.4, 125.6, 67.4, 53.6, 48.4, 32.6, 26.5, 25.3, 24.6, 24.1, 22.7; FT-IR (ATR)  $\nu$  3110 (N-H), 2930, 1567 (N-H), 1346, 1171 (S=O), 801, 721  $\text{cm}^{-1}$ ; HRMS (ESI-TOF) calcd. for  $[\text{C}_{17}\text{H}_{24}\text{Cl}_2\text{N}_2\text{O}_2\text{S}+\text{H}]^+$  391.1008 found 391.1003

#### *N*-((1*R*,2*R*)-2-(Piperidin-1-yl)cyclohexyl)-4-toluenesulfonamide, 2f<sup>S8</sup>

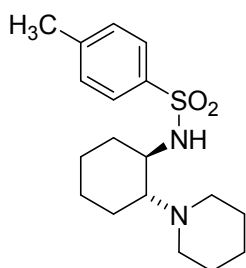

According to the general procedure using 0.424 g (2.33 mmol, 1.0 equiv) of (1*R*,2*R*)-2-(1-piperidinyl)cyclohexylamine and 0.460 g (2.42 mmol, 1.04 equiv) of tosyl chloride, 0.670 g of product was obtained after recrystallization from 2-propanol as white solid (86% yield). The spectra were in accordance with literature data.<sup>S8</sup>

Mp 98 – 99.5 °C (2-propanol) (lit.<sup>S8</sup> Mp 82–84 °C), FT-IR (ATR)  $\tilde{\nu}$  3195 (N-H), 2919, 1401, 1319, 1163 (S=O), 810, 690  $\text{cm}^{-1}$  (lit.<sup>S8</sup> IR: 3195, 2919, 1401, 1319, 1163, 810, 689  $\text{cm}^{-1}$ )

#### *N*-((1*R*,2*R*)-2-(Piperidin-1-yl)cyclohexyl)-3-nitrobenzenesulfonamide, 2g

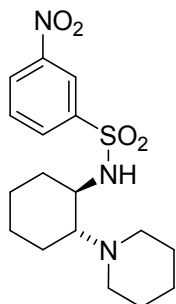

According to the general procedure using 0.364 g (2.00 mmol, 1.0 equiv) of (1*R*,2*R*)-2-(1-piperidinyl)cyclohexylamine and 0.489 g (2.21 mmol, 1.1 equiv) of 3-nitrobenzenesulfonyl chloride, 0.695 g of product was obtained after recrystallization from 2-propanol as white solid (95% yield).

$R_f = 0.457$  ( $\text{CH}_2\text{Cl}_2/\text{MeOH}$  10:1 v:v);  $[\alpha]_D^{21} = -94.9$  ( $c$  0.990,  $\text{CH}_2\text{Cl}_2$ );  $^1\text{H NMR}$  (600 MHz,  $\text{CDCl}_3$ , TMS)  $\delta$  8.74 (t,  $J = 1.9$  Hz, 1H), 8.43 (ddd,  $J = 8.2, 2.2, 1.0$  Hz, 1H), 8.22 – 8.24 (m, 1H), 7.75 (t, 8.0 Hz, 1H), 6.18 (br., 1H), 2.77 (td,  $J = 10.5, 4.0$  Hz, 1H), 2.35 – 2.39 (m, 1H), 2.11 – 2.22 (m 5H), 1.78 – 1.82 (m, 1H), 1.74 – 1.78 (m, 1H), 1.64 – 1.68 (m, 1H), 1.40 – 1.47 (m, 2H), 1.36 (br., 4H), 1.14 – 1.24 (m, 3H), 1.01 – 1.08 (m, 1H);  $^{13}\text{C NMR}$  (151 MHz,  $\text{CDCl}_3$ )  $\delta$  148.3, 142.5, 132.8, 130.3, 126.9, 122.4, 67.4, 53.7, 49.1, 32.6, 26.5, 25.2, 24.5, 24.1, 22.7; FT-IR (ATR)  $\nu$  3137 (N-H), 2933, 1532 (NO), 1349, 1172 (S=O), 906, 877  $\text{cm}^{-1}$ ; HRMS (ESI-TOF) calcd. for  $[\text{C}_{17}\text{H}_{25}\text{N}_3\text{O}_4\text{S}+\text{H}]^+$  368.1639 found 368.1629

<sup>S8</sup> Martins, J. E. D.; Wills, M. *Tetrahedron: Asymmetry* **2008**, *19*, 1250–1255.

### *N*-((1*R*,2*R*)-2-(Piperidin-1-yl)cyclohexyl)-4-nitrobenzenesulfonamide, **2h**

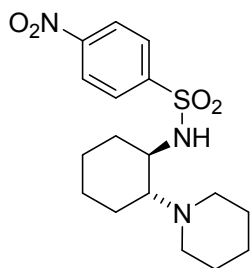

According to the general procedure using 0.364 g (2.00 mmol, 1.0 equiv) of (1*R*,2*R*)-2-(1-piperidinyl)cyclohexylamine and 0.484 g (2.21 mmol, 1.1 equiv) of 4-nitrobenzenesulfonyl chloride, 0.652 g of product was obtained after recrystallization from 2-propanol as white solid (89% yield).

mp 156.6 – 157.5 °C (2-propanol);  $[\alpha]_D^{21} = -101.6$  (*c* 1.25, CH<sub>2</sub>Cl<sub>2</sub>); <sup>1</sup>H NMR (600 MHz, CDCl<sub>3</sub>, TMS) δ 8.37 (d, *J* = 8.9 Hz, 2H), 8.09 (d, *J* = 8.9 Hz, 2H), 6.28 (br., 1H), 2.76 (td, *J* = 10.4, 3.9 Hz, 1H), 2.35 – 2.40 (m, 1H), 2.12 – 2.20 (m, 5H), 1.78 – 1.83 (m, 1H), 1.73 – 1.78 (m, 1H), 1.63 – 1.68 (m, 1H), 1.41 – 1.48 (m, 2H), 1.37 (br., 4H), 1.11 – 1.26 (m, 3H), 1.02 – 1.08 (m, 1H); <sup>13</sup>C NMR (151 MHz, CDCl<sub>3</sub>) δ 149.9, 146.1, 128.5, 124.2, 67.4, 53.6, 48.9, 32.6, 26.5, 25.2, 24.5, 24.1, 22.7; FT-IR (ATR)  $\nu$  3157 (N-H), 2919, 1532 (NO), 1344, 1159 (S=O), 854, 736 cm<sup>-1</sup>; HRMS (ESI-TOF) calcd. for [C<sub>17</sub>H<sub>25</sub>N<sub>3</sub>O<sub>4</sub>S+H]<sup>+</sup> 368.1639 found 368.1628

### *N*-((1*R*,2*R*)-2-(Piperidin-1-yl)cyclohexyl)-benzenesulfonamide, **2i**

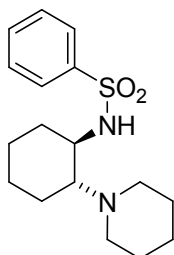

According to the general procedure using 0.571 g (3.14 mmol, 1.0 equiv) of (1*R*,2*R*)-2-(1-piperidinyl)cyclohexylamine and 0.42 mL (3.29 mmol, 1.05 equiv) of benzenesulfonyl chloride, 0.707 g of product was obtained after recrystallization from 2-propanol as white solid (70% yield).

Mp 123.5 – 125 °C (2-propanol);  $[\alpha]_D^{24} = -117$  (*c* 1, CH<sub>2</sub>Cl<sub>2</sub>); <sup>1</sup>H NMR (600 MHz, CDCl<sub>3</sub>, TMS) δ 7.87 – 7.90 (m, 2H), 7.55 – 7.58 (m, 1H), 7.49 – 7.53 (m, 2H), 6.19 (br., 1H), 2.60 – 2.66 (m, 1H), 2.44 – 2.49 (m, 1H), 2.00 – 2.25 (m, 5H), 1.71 – 1.78 (m, 2H), 1.62 – 1.67 (m, 1H), 1.22 – 1.44 (m, 7H), 1.11 – 1.18 (m, 2H), 0.96 – 1.03 (m, 1H); <sup>13</sup>C NMR (151 MHz, CDCl<sub>3</sub>) δ 139.6, 132.5, 128.9, 127.2, 67.4, 53.4, 49.0, 32.8, 26.6, 25.4, 24.5, 24.2, 22.7; FT-IR (ATR)  $\nu$  3195 (N-H), 2919, 1401, 1319, 1163 (S=O), 810, 690 cm<sup>-1</sup>;

### *N*-((1*R*,2*R*)-2-(Piperidin-1-yl)cyclohexyl)-4-fluorobenzenesulfonamide, **2j**

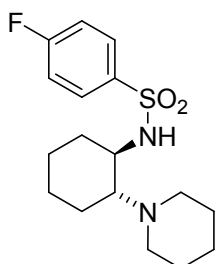

According to the general procedure using 0.364 g (2.00 mmol, 1.0 equiv) of (1*R*,2*R*)-2-(1-piperidinyl)cyclohexylamine and 0.427 g (2.19 mmol, 1.1 equiv) of 4-fluorobenzenesulfonyl chloride, 0.580 g of product was obtained after recrystallization from 2-propanol as white solid (85% yield).

mp 125.0 – 127.5 °C (2-propanol);  $[\alpha]_D^{19} = -109.3$  ( $c$  1.00,  $\text{CH}_2\text{Cl}_2$ );  $^1\text{H}$  NMR (600 MHz,  $\text{CDCl}_3$ , TMS)  $\delta$  7.91 (dd,  $J = 8.8, 5.1$  Hz, 2H), 7.19 (dd,  $J = 8.8, 8.4$  Hz, 2H), ~6.2 (br., 1H), 2.66 (td,  $J = 10.8, 4.2$  Hz, 1H), 2.40 – 2.44 (m, 1H), 2.08 – 2.17 (m, 5H), 1.72 – 1.80 (m, 2H), 1.64 – 1.67 (m, 1H), 1.39 – 1.45 (m, 2H), 1.35 (br., 4H), 1.11 – 1.28 (m, 3H), 0.99 – 1.06 (m, 1H);  $^{13}\text{C}$  NMR (151 MHz,  $\text{CDCl}_3$ )  $\delta$  165.0 (d,  $J_{\text{C-F}} = 255$  Hz), 136.0 (d,  $J_{\text{C-F}} = 2.8$  Hz), 129.9 (d,  $J_{\text{C-F}} = 9.2$  Hz), 116.1 (d,  $J_{\text{C-F}} = 22.4$  Hz), 67.4, 53.5, 49.1, 32.7, 26.5, 25.3, 24.5, 24.2, 22.7;  $^{19}\text{F}$  NMR (376 MHz,  $\text{CDCl}_3$ )  $\delta$  -105.67 (tt,  $J_{\text{F-H}} = 8.4, 5.2$  Hz, 1F); FT-IR (ATR)  $\nu$  3128 (N-H), 2929, 1591 (N-H), 1311, 1156 (S=O), 728  $\text{cm}^{-1}$ ; HRMS (ESI-TOF) calcd. for  $[\text{C}_{17}\text{H}_{25}\text{FN}_2\text{O}_2\text{S}+\text{H}]^+$  341.1694 found 341.1699

***N*-((1*R*,2*R*)-2-(Piperidin-1-yl)cyclohexyl)-3,5-dimethylbenzenesulfonamide, 2k**

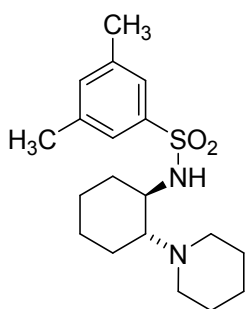

According to the general procedure using 0.364 g (2.00 mmol, 1.0 equiv) of (1*R*,2*R*)-2-(1-piperidinyl)cyclohexylamine and 0.448 g (2.21 mmol, 1.1 equiv) of 3,5-dimethylbenzenesulfonyl chloride, 0.606 g of product was obtained after recrystallization from 2-propanol as white solid (86% yield).

mp 142.0 – 143.6 °C (2-propanol);  $[\alpha]_D^{21} = -118.3$  ( $c$  0.994,  $\text{CH}_2\text{Cl}_2$ );  $^1\text{H}$  NMR (600 MHz,  $\text{CDCl}_3$ , TMS)  $\delta$  7.49 (s, 2H), 7.18 (s, 1H), 6.18 (br., 1H), 2.59 (td,  $J = 10.6, 4.1$  Hz, 1H), 2.45 – 2.50 (m, 1H), 2.38 (s, 6H), 2.03 – 2.18 (m, 5H), 1.71 – 1.79 (m, 2H), 1.63 – 1.67 (m, 1H), 1.41 (br., 2H), 1.36 (br., 4H), 1.23 – 1.30 (m, 1H), 1.09 – 1.20 (m, 2H), 1.01 (dq,  $J = 12.2, 3.2$  Hz, 1H);  $^{13}\text{C}$  NMR (151 MHz,  $\text{CDCl}_3$ )  $\delta$  139.1, 138.9, 134.2, 124.8, 67.4, 53.3, 48.9, 32.7, 26.6, 25.4, 24.6, 24.2, 22.7, 21.3; FT-IR (ATR)  $\nu$  3127 (N-H), 2930, 1454, 1342 (S=O), 1159 (S=O), 857, 734  $\text{cm}^{-1}$ ; HRMS (ESI-TOF) calcd. for  $[\text{C}_{19}\text{H}_{30}\text{N}_2\text{O}_2\text{S}+\text{H}]^+$  351.2101 found 351.2099

***N*-((1*R*,2*R*)-2-(Piperidin-1-yl)cyclohexyl)-2-naphthalenesulfonamide, 2l**

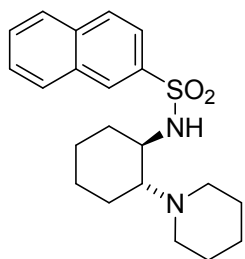

According to the general procedure using 0.364 g (2.00 mmol, 1.0 equiv) of (1*R*,2*R*)-2-(1-piperidinyl)cyclohexylamine and 0.500 g (2.21 mmol, 1.1 equiv) of 2-naphthalenesulfonyl chloride, 0.642 g of product was obtained after recrystallization from 2-propanol as white solid (86% yield).

mp 105.0 – 106.3 °C (2-propanol);  $[\alpha]_D^{21} = -69.7$  ( $c$  1.00,  $\text{CH}_2\text{Cl}_2$ );  $^1\text{H}$  NMR (600 MHz,  $\text{CDCl}_3$ , TMS)  $\delta$  8.45 (d,  $J = 0.8$  Hz, 1H), 7.98 (d,  $J = 7.9$  Hz, 1H), 7.96 (d,  $J = 8.8$  Hz, 1H), 7.91 (d,  $J = 8.0$  Hz, 1H), 7.87 (dd,  $J = 8.5, 1.7$  Hz, 1H), 7.64 (ddd,  $J = 8.0, 7.0, 1.5$  Hz, 1H), 7.61 (ddd,  $J = 8.0, 7.0, 1.5$  Hz, 1H), 6.33 (br., 1H), 2.66 (td,  $J = 10.5, 3.7$  Hz, 1H), 2.48 – 2.52 (m, 1H), 2.14 (t,  $J = 11.0$  Hz, 1H), 2.06 (br., 4H), 1.69 – 1.75 (m, 2H), 1.62 – 1.66 (m, 1H), 1.24 – 1.40 (m,



7H), 1.07 – 1.19 (m, 2H), 0.92 – 0.98 (m, 1H);  $^{13}\text{C}$  NMR (151 MHz,  $\text{CDCl}_3$ )  $\delta$  136.6, 134.8, 132.2, 129.25, 129.15, 128.7, 128.4, 127.9, 127.5, 122.8, 67.4, 53.4, 48.8, 32.7, 26.5, 25.3, 24.5, 24.2, 22.7; FT-IR (ATR)  $\nu$  3183 (N-H), 2917, 1332 (S=O), 1316, 1160 (S=O), 830, 753  $\text{cm}^{-1}$ ; HRMS (ESI-TOF) calcd. for  $[\text{C}_{21}\text{H}_{28}\text{N}_2\text{O}_2\text{S}+\text{H}]^+$  373.1944 found 373.1954

***N*-((1*R*,2*R*)-2-(Piperidin-1-yl)cyclohexyl)-2-fluorobenzenesulfonamide, 2m**

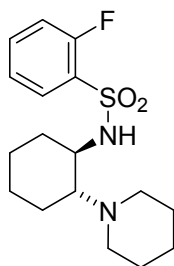

According to the general procedure using 0.600 g (3.29 mmol, 1.0 equiv) of (1*R*,2*R*)-2-(1-piperidinyl)cyclohexylamine and 0.707 g (3.63 mmol, 1.1 equiv) of 2-fluorobenzenesulfonyl chloride, 1.01 g of product was obtained as orange oil that crystallized over 12 months of storage (90% yield).

$R_f$  = 0.839 ( $\text{CH}_2\text{Cl}_2/\text{MeOH}$  10:1 v:v);  $[\alpha]_{\text{D}}^{22} = -93.4$  ( $c$  1,  $\text{CH}_2\text{Cl}_2$ );  $^1\text{H}$  NMR (600 MHz,  $\text{CDCl}_3$ , TMS)  $\delta$  7.91 (td,  $J = 7.5, 1.6$  Hz, 1H), 7.55 – 7.59 (m, 1H), 7.28 (td,  $J = 7.7, 1.1$  Hz, 1H), 7.18 – 7.22 (m, 1H), 6.4 (br., 1H), 2.70 (td,  $J = 10.6, 4.0$  Hz, 1H), 2.44 – 2.49 (m, 1H), 2.14 – 2.26 (m, 5H), 1.78 – 1.82 (m, 1H), 1.71 – 1.75 (m, 1H), 1.61 – 1.66 (m, 1H), 1.44 – 1.49 (m, 4H) 1.37 (br., 2H), 1.23 – 1.30 (m, 1H), 1.07 – 1.21 (m, 2H), 1.01 – 1.08 (m, 1H);  $^{13}\text{C}$  NMR (151 MHz,  $\text{CDCl}_3$ )  $\delta$  159.1 (d,  $J_{\text{C-F}} = 255$  Hz), 134.9 (d,  $J_{\text{C-F}} = 8.2$  Hz), 130.8, 127.7 (d,  $J_{\text{C-F}} = 13.9$  Hz), 124.4 (d,  $J_{\text{C-F}} = 3.8$  Hz), 117.0 (d,  $J_{\text{C-F}} = 21.0$  Hz); 67.6, 53.6, 49.4, 32.9, 26.3, 25.4, 24.7, 24.2, 22.8;  $^{19}\text{F}$  NMR (376 MHz,  $\text{CDCl}_3$ )  $\delta$  -108.22 (s, 1F); FT-IR (ATR)  $\nu$  3198 (N-H), 2933, 1599 (N-H), 1345 (S=O), 1165 (S=O), 763  $\text{cm}^{-1}$ ; HRMS (ESI-TOF) calcd. for  $[\text{C}_{17}\text{H}_{25}\text{FN}_2\text{O}_2\text{S}+\text{H}]^+$  341.1694 found 341.1685

***N*-((1*R*,2*R*)-2-(Piperidin-1-yl)cyclohexyl)-2,3,4-trifluorobenzenesulfonamide, 2n**

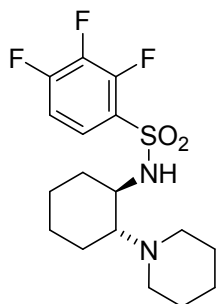

According to the general procedure using 0.364 g (2.00 mmol, 1.0 equiv) of (1*R*,2*R*)-2-(1-piperidinyl)cyclohexylamine and 0.504 g (2.19 mmol, 1.1 equiv) of 2,3,4-trifluorobenzenesulfonyl chloride, 0.635 g of product was obtained after recrystallization from 2-propanol as white solid (84% yield).

mp 158.0 – 160.0  $^{\circ}\text{C}$  (2-propanol);  $[\alpha]_{\text{D}}^{20} = -91.1$  ( $c$  1.01,  $\text{CH}_2\text{Cl}_2$ );  $^1\text{H}$  NMR (600 MHz,  $\text{CDCl}_3$ , TMS; label: MD-110A-solid1)  $\delta$  7.67 – 7.71 (m, 1H), 7.10 – 7.14 (m, 1H), 6.48 (br., 1H), 2.75 (dd,  $J = 10.5, 4.0$  Hz, 1H), 2.37 – 2.41 (m, 1H), 2.26 – 2.32 (m, 2H), 2.20 – 2.26 (m, 2H), 2.15 – 2.19 (m, 1H), 1.81 – 1.85 (m, 1H), 1.73 – 1.78 (m, 1H), 1.62 – 1.67 (m, 1H), 1.49 – 1.52 (m, 2H), 1.43 – 1.49 (m, 2H), 1.40 (br., 2H), 1.05 – 1.28 (m, 4H);  $^{13}\text{C}$  NMR (151 MHz,  $\text{CDCl}_3$ )  $\text{sp}^2$  region not interpreted due to complicated C-F couplings,  $\delta$   $\text{sp}^3$ : 67.6, 53.7, 49.5, 32.7, 26.3, 25.4, 24.7,

24.2, 22.9;  $^{13}\text{C}\{^{19}\text{F}\}$  NMR (101 MHz,  $\text{CDCl}_3$ )  $\delta$   $\text{sp}^2$ : 154.1 (dd,  $J_{\text{C-H}} = 13.3, 5.2$  Hz), 148.7 (dd,  $J_{\text{C-H}} = 11.5, 1.7$  Hz), 140.4 (dd,  $J_{\text{C-H}} = 8.1, 1.9$  Hz), 126.1 (m), 124.3 (d,  $J_{\text{C-H}} = 172$  Hz), 112.4 (d,  $J_{\text{C-H}} = 170$  Hz);  $\text{sp}^3$  uninterpretable due to complicated C–H coupling;  $^{19}\text{F}$  NMR (376 MHz,  $\text{CDCl}_3$ )  $\delta$  -124.94 – (-125.06) (m, 1F), -128.35 – (-128.46) (m, 1F), -156.57 – (-156.71) (m, 1F); FT-IR (ATR)  $\nu$  3171 (N-H), 2927, 1607 (N-H), 1348 (S=O), 1161 (S=O), 1033  $\text{cm}^{-1}$ ; HRMS (ESI-TOF) calcd. for  $[\text{C}_{17}\text{H}_{23}\text{F}_3\text{N}_2\text{O}_2\text{S}+\text{H}]^+$  377.1505 found 377.1504

***N*-((1*R*,2*R*)-2-(Piperidin-1-yl)cyclohexyl)-2,4-difluorobenzenesulfonamide,**

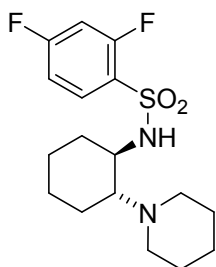

**2o**

According to the general procedure using 0.364 g (2.00 mmol, 1.0 equiv) of (1*R*,2*R*)-2-(1-piperidinyl)cyclohexylamine and 0.469 g (2.21 mmol, 1.1 equiv) of 2,4-difluorobenzenesulfonyl chloride, 0.319 g of product was obtained after recrystallization from 2-propanol as white solid (44% yield).

mp 100.0 – 101.5 °C (2-propanol);  $[\alpha]_{\text{D}}^{19} = -101.0$  ( $c$  0.995,  $\text{CH}_2\text{Cl}_2$ );  $^1\text{H}$  NMR (600 MHz,  $\text{CDCl}_3$ , TMS)  $\delta$  7.93 (td,  $J = 8.4, 6.3$  Hz, 1H), 7.00 – 7.03 (m, 1H), 6.95 (ddd,  $J = 10.7, 8.4, 2.4$  Hz, 1H), 6.46 (br., 1H), 2.71 (td,  $J = 10.6, 4.0$  Hz, 1H), 2.40 – 2.44 (m, 1H), 2.25 – 2.30 (m, 2H), 2.18 – 2.25 (m, 3H), 1.80 – 1.84 (m, 1H), 1.72 – 1.77 (m, 1H), 1.62 – 1.66 (m, 1H), 1.42 – 1.54 (m, 4H), 1.38 (br., 2H), 1.03 – 1.28 (m, 4H);  $^{13}\text{C}$  NMR (151 MHz,  $\text{CDCl}_3$ )  $\delta$  165.6 (dd,  $J_{\text{C-F}} = 257, 10.4$  Hz), 159.7 (dd,  $J_{\text{C-F}} = 258, 12.7$  Hz), 132.4 (dd,  $J_{\text{C-F}} = 10.3, 1.3$  Hz), 124.4 (dd,  $J_{\text{C-F}} = 14.1, 3.8$  Hz), 111.7 (dd,  $J_{\text{C-F}} = 21.8, 3.8$  Hz), 105.5 (t,  $J_{\text{C-F}} = 25.4$  Hz), 67.5, 53.5, 49.3, 32.6, 26.2, 25.3, 24.6, 24.1, 22.7;  $^{19}\text{F}$  NMR (376 MHz,  $\text{CDCl}_3$ )  $\delta$  -101.07 – (-100.98) (m, 1F), -103.18 – (-103.10) (m, 1F); FT-IR (ATR)  $\nu$  3190 (N-H), 2920, 1603 (N-H), 1166 (S=O), 967, 845  $\text{cm}^{-1}$ ; HRMS (ESI-TOF) calcd. for  $[\text{C}_{17}\text{H}_{24}\text{F}_2\text{N}_2\text{O}_2\text{S}+\text{H}]^+$  359.1599 found 359.1608

***N*-((1*R*,2*R*)-2-(Piperidin-1-yl)cyclohexyl)-pentafluorobenzenesulfonamide,**

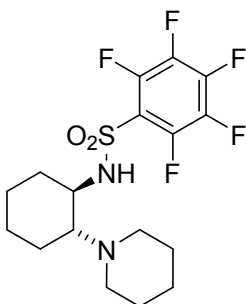

**2p**

According to the general procedure using 0.359 g (1.96 mmol, 1.0 equiv) of (1*R*,2*R*)-2-(1-piperidinyl)cyclohexylamine and 0.320 mL (2.15 mmol, 1.1 equiv) of pentafluorobenzenesulfonyl chloride, 0.524 g of product was obtained after recrystallization from 2-propanol as white solid (64% yield).

mp 182.0 – 183.4 °C (2-propanol);  $[\alpha]_{\text{D}}^{21} = -88.6$  ( $c$  1.00,  $\text{CH}_2\text{Cl}_2$ );  $^1\text{H}$  NMR (600 MHz,  $\text{CDCl}_3$ , TMS)  $\delta$  6.54 (br., 1H), 2.89 (td,  $J = 10.5, 4.0$  Hz, 1H), 2.46 – 2.51 (m, 1H), 2.29 – 2.37 (m, 2H), 2.26 (br., 2H), 2.16 – 2.21 (m, 1H), 1.83 – 1.87 (m, 1H), 1.76 – 1.81 (m, 1H), 1.66 –

1.71 (m, 1H), 1.50 – 1.56 (m, 2H), 1.36 – 1.50 (m, 4H), 1.24 – 1.31 (m, 1H), 1.09 – 1.22 (m, 3H); <sup>13</sup>C NMR (151 MHz, CDCl<sub>3</sub>) sp<sup>2</sup> not interpreted due to complicated C-F coupling, δ sp<sup>3</sup>: 67.6, 54.0, 49.5, 32.4, 26.2, 25.4, 24.6, 24.2, 22.9; <sup>13</sup>C {<sup>19</sup>F} NMR (101 MHz, CDCl<sub>3</sub>) δ 144.7, 143.8, 137.9, 116.3; <sup>19</sup>F NMR (376 MHz, CDCl<sub>3</sub>) δ -135.48 – (-135.35) (m, 2F), -105.67 (tt, *J* = 8.4, 5.2 Hz, 1F), -158.71 – (-158.55) (m, 2F); FT-IR (ATR) ν 3133, 2941, 1648 (N-H), 1500, 1361, 1172, 1097, 990, 715 cm<sup>-1</sup>; HRMS (ESI-TOF) calcd. for [C<sub>17</sub>H<sub>21</sub>F<sub>5</sub>N<sub>2</sub>O<sub>2</sub>S+H]<sup>+</sup> 413.1317 found 413.1317

### ***N*-((1*R*,2*R*)-2-(Piperidin-1-yl)cyclohexyl)-8-quinolinesulfonamide, 2q**

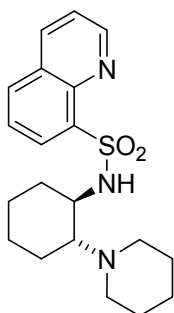

According to the general procedure using 0.674 g (3.70 mmol, 1.0 equiv) of (1*R*,2*R*)-2-(1-piperidinyl)cyclohexylamine and 0.923 g (4.06 mmol, 1.1 equiv) of quinoline-8-sulfonyl chloride, 1.35 g of product was obtained after recrystallization from 2-propanol as white solid (98% yield).

mp 242 °C (dec., 2-propanol); [α]<sub>D</sub><sup>21</sup> = -272.7 (*c* 0.902, CH<sub>2</sub>Cl<sub>2</sub>); <sup>1</sup>H NMR (600 MHz, CDCl<sub>3</sub>) δ 9.12 (dd, *J* = 4.2, 1.6 Hz, 1H), 8.41 (dd, *J* = 7.3, 1.3 Hz, 1H), 8.24 (dd, *J* = 8.3, 1.6 Hz, 1H), 8.01 (dd, *J* = 8.2, 1.2 Hz, 1H), 7.62 (t, *J* = 7.7 Hz, 1H), 7.53 (dd, *J* = 8.3, 4.2 Hz, 1H), 7.10 (br., 1H), 2.90 – 2.96 (m, 1H), 2.60 (d, *J* = 12.3 Hz, 1H), 2.16 (t, *J* = 9.8 Hz, 1H), 2.03 (br., 3H), 1.60-1.75 (m, 3H), 1.32 – 1.41 (m, 1H), 1.09 – 1.16 (m, 2H), 0.94 – 1.09 (m, 5H), 0.52 (br., 2H); <sup>13</sup>C NMR (151 MHz, CDCl<sub>3</sub>) δ 151.3, 143.8, 137.4, 136.6, 132.8, 130.3, 129.0, 125.5, 122.1; 67.5, 54.2, 49.2, 34.7, 25.4 (2C overlapped), 24.5, 24.3, 22.9; FT-IR (ATR) ν 3196 (N-H), 2932, 1332 (S=O), 1165 (S=O), 838 cm<sup>-1</sup>; HRMS (ESI-TOF) calcd. for [C<sub>20</sub>H<sub>27</sub>N<sub>3</sub>O<sub>2</sub>S+H]<sup>+</sup> 374.1897 found 374.1905

### ***N*-((1*R*,2*R*)-2-(Piperidin-1-yl)cyclohexyl)-2,6-dichlorobenzenesulfonamide, 2r**

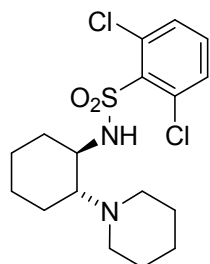

According to the general procedure using 0.364 g (2.00 mmol, 1.0 equiv) of (1*R*,2*R*)-2-(1-piperidinyl)cyclohexylamine and 0.547 g (2.23 mmol, 1.1 equiv) of 2,6-dichlorobenzenesulfonyl chloride, 0.695 g of product was obtained after recrystallization from 2-propanol as pale yellow solid (89% yield).

mp 164.5 – 166.2 °C (2-propanol); [α]<sub>D</sub><sup>20</sup> = -108.5 (*c* 1.02, CH<sub>2</sub>Cl<sub>2</sub>); <sup>1</sup>H NMR (600 MHz, CDCl<sub>3</sub>, TMS) δ 7.47 (d, *J* = 8.0 Hz, 2H), 7.33 (t, *J* = 8.0 Hz, 1H), 6.73 (br., 1H), 2.95 (td, *J* = 10.5, 4.0 Hz, 1H), 2.55 – 2.59 (m, 1H), 2.29 – 2.33 (m, 2H), 2.22 (br., 2H), 2.16 (td, *J* = 11.0, 3.1 Hz, 1H), 1.80 – 1.84 (m, 1H), 1.73 – 1.77 (m, 1H), 1.63 – 1.67 (m, 1H), 1.40 – 1.48 (m, 4H), 1.36 (br., 2H), 1.08 – 1.27 (m, 4H); <sup>13</sup>C NMR (151 MHz, CDCl<sub>3</sub>) δ 136.1, 135.1, 132.1, 131.4, 67.7, 53.8,

49.4, 32.7, 26.1, 25.4, 24.6, 24.3, 22.8; FT-IR (ATR)  $\nu$  3186 (N-H), 2940, 1558 (N-H), 1425, 1175 (S=O), 736  $\text{cm}^{-1}$ ; HRMS (ESI-TOF) calcd. for  $[\text{C}_{17}\text{H}_{24}\text{Cl}_2\text{N}_2\text{O}_2\text{S}+\text{H}]^+$  391.1008 found 391.1003

***N*-((1*R*,2*R*)-2-(Piperidin-1-yl)cyclohexyl)-2,4,6-triisopropylbenzenesulfonamide, 2s**

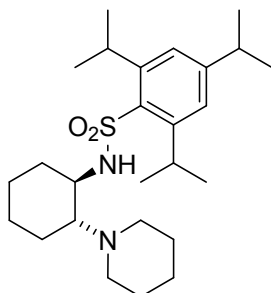

According to the general procedure using 0.595 g (3.27 mmol, 1.0 equiv) of (1*R*,2*R*)-2-(1-piperidinyl)cyclohexylamine and 1.08 g (3.63 mmol, 1.1 equiv) of 2,4,6-triisopropylbenzenesulfonyl chloride, 1.30 g of product was obtained as orange oil (90% yield).

$R_f = 0.869$  ( $\text{CH}_2\text{Cl}_2/\text{MeOH}$  10:1 v:v);  $[\alpha]_D^{21} = -48.5$  ( $c$  0.957,  $\text{CH}_2\text{Cl}_2$ );  $^1\text{H}$  NMR (600 MHz,  $\text{CDCl}_3$ , TMS)  $\delta$  7.14 (s, 2H), 6.1 (br., 1H), 4.31 (sep,  $J = 6.8$  Hz, 2H), 3.36 (td,  $J = 10.7, 3.8$  Hz, 1H), 2.89 (sept.,  $J = 6.9$  Hz, 1H), 2.62 – 2.66 (m, 2H), 2.22 – 2.26 (m, 2H), 2.11 (td,  $J = 10.9, 2.9$  Hz, 1H), 1.97 – 2.02 (m, 1H), 1.82 – 1.86 (m, 1H), 1.73 – 1.77 (m, 1H), 1.53 – 1.60 (m, 4H), 1.46 – 1.51 (m, 2H), 1.37 – 1.43 (m, 2H), 1.27 (d,  $J = 6.6$  Hz, 12H), 1.24 (d,  $J = 7.0$  Hz, 6H), 1.10 – 1.23 (m, 4H), 0.97 – 1.04 (m, 1H);  $^{13}\text{C}$  NMR (151 MHz,  $\text{CDCl}_3$ ),  $\delta$  152.6, 150.1, 134.6, 123.8; 67.6, 53.4, 49.0, 34.3, 33.0, 29.6, 26.6, 25.6, 25.2, 24.8, 24.7, 24.4, 23.77, 23.75, 23.0; FT-IR (ATR)  $\nu$  3154, 2931, 1600 (N-H), 1308 (S=O), 1149 (S=O)  $\text{cm}^{-1}$ ; HRMS (ESI-TOF) calcd. for  $[\text{C}_{26}\text{H}_{44}\text{N}_2\text{O}_2\text{S}+\text{H}]^+$  449.3196 found 449.3196

***N*-((1*R*,2*R*)-2-(Piperidin-1-yl)cyclohexyl)-methanesulfonamide, 2t**

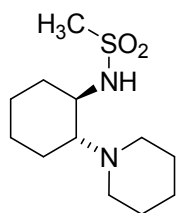

According to the general procedure using 0.555 g (3.05 mmol, 1.0 equiv) of (1*R*,2*R*)-2-(1-piperidinyl)cyclohexylamine and 0.26 mL (3.36 mmol, 1.1 equiv) of methanesulfonyl chloride, 0.528 g of product was obtained after recrystallization from 2-propanol as white solid (67% yield).

mp 141.7 – 143.8  $^\circ\text{C}$  (2-propanol);  $[\alpha]_D^{21} = -89.3$  ( $c$  0.996,  $\text{CH}_2\text{Cl}_2$ );  $^1\text{H}$  NMR (600 MHz,  $\text{CDCl}_3$ , TMS)  $\delta$  6.0 (br., 1H), 3.14 (td,  $J = 10.4, 4.2$  Hz, 1H), 2.96 (s, 3H), 2.58 – 2.62 (m, 2H), 2.39 – 2.42 (m, 1H), 2.27 – 2.32 (m, 2H), 2.15 (td,  $J = 10.9, 3.4$  Hz, 1H), 1.86 – 1.89 (m, 1H), 1.78 – 1.83 (m, 1H), 1.68 – 1.71 (m, 1H), 1.57 – 1.63 (m, 2H), 1.48 – 1.54 (m, 2H), 1.43 (br., 2H), 1.17 – 1.31 (m, 4H);  $^{13}\text{C}$  NMR (151 MHz,  $\text{CDCl}_3$ )  $\delta$  67.5, 53.7, 49.4, 41.7, 33.1, 26.7, 25.5, 24.8, 24.3, 23.0; FT-IR (ATR)  $\nu$  3178 (N-H), 2934, 1313 (S=O), 1143 (S=O), 779  $\text{cm}^{-1}$ ; HRMS (ESI-TOF) calcd. for  $[\text{C}_{12}\text{H}_{24}\text{N}_2\text{O}_2\text{S}+\text{H}]^+$  261.1631 found 261.1629

### ***N*-((1*R*,2*R*)-2-(Piperidin-1-yl)cyclohexyl)- trifluoromethanesulfonamide, 2u**

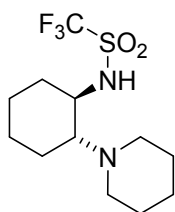

According to the general procedure using 0.369 g (2.02 mmol, 1.0 equiv) of (1*R*,2*R*)-2-(1-piperidinyl)cyclohexylamine and 0.375 mL (2.23 mmol, 1.1 equiv) of trifluoromethanesulfonyl anhydride, 0.497 g of product was obtained after crystallization by slow evaporation from MTBE and cyclohexane mixture as a yellow solid (59% yield).

$R_f = 0.582$  (CH<sub>2</sub>Cl<sub>2</sub>/MeOH 10:1 v:v); <sup>1</sup>H NMR (600 MHz, CDCl<sub>3</sub>, TMS) δ 6.16 (br., 1H), 3.30 (td,  $J = 10.5, 3.9$  Hz, 1H), 2.64 – 2.69 (m, 2H), 2.42 – 2.48 (m, 1H), 2.36 (br., 2H), 2.21 – 2.26 (m, 1H), 1.87 – 1.92 (m, 1H), 1.80 – 1.85 (m, 1H), 1.70 – 1.74 (m, 1H), 1.61 – 1.67 (m, 2H), 1.57 (br., 2H), 1.46 (br., 2H), 1.27 – 1.35 (m, 1H), 1.19 – 1.26 (m, 3H); <sup>13</sup>C NMR (151 MHz, CDCl<sub>3</sub>) δ 119.9 (q,  $J_{C-F} = 241$  Hz), 68.4, 54.7, 49.3, 32.6, 26.1, 25.2, 24.3, 24.1, 22.9; <sup>19</sup>F NMR (376 MHz, CDCl<sub>3</sub>) δ -76.95 (s, 3F); FT-IR (ATR) ν 3220, 3107, 2936, 1361, 1182, 1148, 953, 901 cm<sup>-1</sup>; HRMS (ESI-TOF) calcd. for [C<sub>12</sub>H<sub>21</sub>F<sub>3</sub>N<sub>2</sub>O<sub>2</sub>S+H]<sup>+</sup> 315.1349 found 315.1346

### ***N*-((1*R*,2*R*)-2-(Piperidin-1-yl)cyclohexyl)-cyclohexanesulfonamide, 2v**

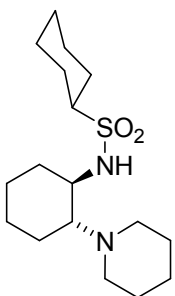

According to the general procedure using 0.181 g (1.00 mmol, 1.0 equiv) of (1*R*,2*R*)-2-(1-piperidinyl)cyclohexylamine and 0.165 mL (1.15 mmol, 1.1 equiv) of cyclohexanesulfonyl chloride, 0.073 g of product was obtained after recrystallization from 2-propanol as pale yellow solid (22% yield).

mp 149.8 – 151.3 °C (2-propanol);  $[\alpha]_D^{21} = -64.9$  ( $c$  1, CH<sub>2</sub>Cl<sub>2</sub>); <sup>1</sup>H NMR (600 MHz, CDCl<sub>3</sub>, TMS) δ 5.76 (br., 1H), 3.21 (td,  $J = 10.0, 4.0$  Hz, 1H), 2.81 (tt,  $J = 12.1, 3.3$  Hz, 1H), 2.59 – 2.64 (m, 2H), 2.35 – 2.39 (m, 1H), 2.17 – 2.32 (m, 4H), 2.12 – 2.17 (m, 1H), 1.84 – 1.93 (m, 3H), 1.76 – 1.83 (m, 1H), 1.65 – 1.73 (m, 2H), 1.50 – 1.62 (m, 6H), 1.42 (br., 2H), 1.16 – 1.32 (m, 7H); <sup>13</sup>C NMR (151 MHz, CDCl<sub>3</sub>) δ 67.7, 61.6, 53.0, 49.2 (br., 2C), 33.4, 26.5 (3C), 26.3, 25.5, 25.33, 25.28, 25.25, 24.7, 24.3, 22.9; FT-IR (ATR) ν 3216 (N-H), 2924, 1335, 1310, 1140, 892, 770 cm<sup>-1</sup>; HRMS (ESI-TOF) calcd. for [C<sub>17</sub>H<sub>32</sub>N<sub>2</sub>O<sub>2</sub>S+H]<sup>+</sup> 329.2257 found 329.2265

### ***N,N*-Bis((1*R*,2*R*)-2-(piperidin-1-yl)cyclohexyl)-1,3-benzenedisulfonamide, 2w**

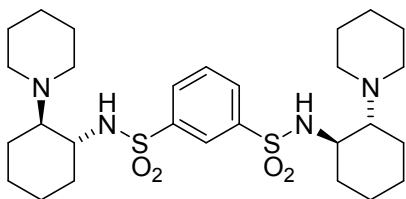

According to the general procedure using 0.309 g (1.70 mmol, 1.0 equiv) of (1*R*,2*R*)-2-(1-piperidinyl)cyclohexylamine and 0.199 g (0.723 mmol, 0.43 equiv) of benzene-1,3-disulfonyl

chloride, 0.377 g of product was obtained as white solid sparingly soluble in 2-propanol (92% yield). The compound melts in very broad temperature range 75 – 108 °C.

$R_f = 0.234$  ( $\text{CH}_2\text{Cl}_2/\text{MeOH}$  10:1 v:v);  $[\alpha]_D^{21} = -91.5$  ( $c$  1.02,  $\text{CH}_2\text{Cl}_2$ );  $^1\text{H NMR}$  (600 MHz,  $\text{CDCl}_3$ )  $\delta$  8.40 (t,  $J = 1.4$  Hz, 1H), 8.08 (dd,  $J = 7.8, 1.7$  Hz, 2H), 7.68 (t,  $J = 7.8$  Hz, 1H), 6.30 (br., 2H), 2.76 (td,  $J = 10.4, 3.9$  Hz, 2H), 2.33 – 2.38 (m, 2H), 2.11 – 2.22 (m, 10H), 1.76 – 1.81 (m, 2H), 1.72 – 1.76 (m, 2H), 1.61 – 1.66 (m, 2H), 1.43 – 1.49 (m, 4H), 1.36 (br., 8H), 1.12 – 1.23 (m, 6H), 1.01 – 1.09 (m, 2H);  $^{13}\text{C NMR}$  (151 MHz,  $\text{CDCl}_3$ )  $\delta$  141.7, 130.7, 129.8, 126.0, 67.4, 53.6, 49.1, 32.6, 26.5, 25.3, 24.6, 24.1, 22.7; FT-IR (ATR)  $\nu$  3176 (N-H), 2931, 1343 (S=O), 1155 (S=O), 959, 905, 794  $\text{cm}^{-1}$ ; HRMS (ESI-TOF) calcd. for  $[\text{C}_{28}\text{H}_{46}\text{N}_4\text{O}_4\text{S}_2+\text{H}]^+$  567.3033, found 567.3020

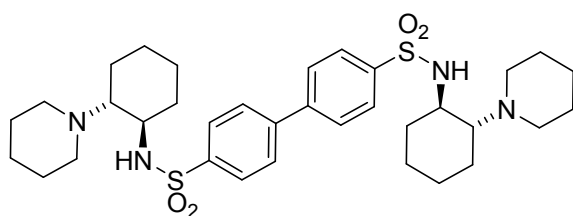

***N',N'*-Bis((1*R*,2*R*)-2-(piperidin-1-yl)cyclohexyl)-4,4'-biphenyldisulfonamide, 2x**

According to the general procedure using 0.309 g (1.70 mmol, 1.0 equiv) of (1*R*,2*R*)-2-(1-piperidinyl)cyclohexylamine and 0.248 g (0.706 mmol, 0.42 equiv) of biphenyl-4,4'-disulfonyl chloride, 0.435 g of product was obtained after recrystallization from 2-propanol as white solid (80% yield).

mp 207.7 – 209.5 °C;  $[\alpha]_D^{21} = -109.9$  ( $c$  1.00,  $\text{CH}_2\text{Cl}_2$ );  $^1\text{H NMR}$  (600 MHz,  $\text{CDCl}_3$ , TMS)  $\delta$  8.00 (d,  $J = 7.9$  Hz, 4H), 7.74 (d,  $J = 8.4$  Hz, 4H), 6.25 (br., 2H), 2.74 (td,  $J = 10.5, 3.7$  Hz, 2H), 2.45 – 2.50 (m, 2H), 2.05 – 2.19 (m, 10H), 1.79 (d,  $J = 13.0$  Hz, 2H), 1.73 – 1.77 (m, 2H), 1.65 – 1.69 (m, 2H), 1.32 – 1.44 (m, 12H), 1.24 – 1.32 (m, 2H), 1.12 – 1.22 (m, 4H), 1.01 – 1.07 (m, 2H);  $^{13}\text{C NMR}$  (151 MHz,  $\text{CDCl}_3$ )  $\delta$  143.4, 139.7, 128.0, 127.8, 67.4, 53.5, 49.0, 32.9, 26.6, 25.3, 24.5, 24.2, 22.7; FT-IR (ATR)  $\nu$  3169 (N-H), 2929, 1594 (N-H), 1337 (S=O), 1165 (S=O), 827, 713  $\text{cm}^{-1}$ ; HRMS (ESI-TOF) calcd. for  $[\text{C}_{34}\text{H}_{50}\text{N}_4\text{O}_4\text{S}_2+\text{H}]^+$  643.3346 found 643.3353

***N',N'*-Bis((1*R*,2*R*)-2-(piperidin-1-yl)cyclohexyl)-sulfamide, 2y**

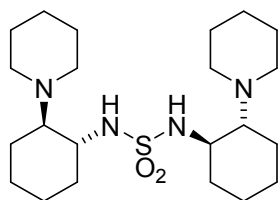

According to the general procedure using 0.308 g (1.69 mmol, 1.0 equiv) of (1*R*,2*R*)-2-(1-piperidinyl)cyclohexylamine and 0.057 mL (0.705 mmol, 0.42 equiv) of sulfonyl chloride, 0.062 g of product was obtained after recrystallization from 2-propanol as pale yellow solid (21% yield).

mp 179.5–181 °C (dec., 2-propanol);  $[\alpha]_D^{21} = -96.1$  ( $c$  1.02,  $\text{CH}_2\text{Cl}_2$ );  $^1\text{H NMR}$  (600 MHz,  $\text{CDCl}_3$ , TMS)  $\delta$  5.93 (br., 2H), 3.17 (td,  $J = 10.2, 3.9$  Hz, 2H), 2.63 – 2.68 (m, 4H), 2.47 – 2.52 (m, 2H), 2.26 (br., 4H), 2.12 (td,  $J = 10.4, 3.2$  Hz, 2H), 1.83 – 1.87 (m, 2H), 1.76 – 1.81 (m, 2H), 1.65 – 1.70 (m,

2H), 1.50 – 1.62 (m, 8H), 1.42 (br., 4H), 1.15 – 1.26 (m, 8H);  $^{13}\text{C}$  NMR (151 MHz,  $\text{CDCl}_3$ )  $\delta$  67.8, 53.9, 49.3, 33.0, 26.7, 25.7, 24.9, 24.5, 23.0; FT-IR (ATR)  $\nu$  3183, 3161, 2927, 1308, 1153, 1147, 960, 771  $\text{cm}^{-1}$ ; HRMS (ESI-TOF) calcd. for  $[\text{C}_{22}\text{H}_{42}\text{N}_4\text{O}_2\text{S}+\text{H}]^+$  427.3101 found 427.3100.

Catalysts **1** and **3-5**

***N*-((1*R*,2*R*)-2-(Pyrrolidin-1-yl)cyclohexyl)-3,5-bis(trifluoromethyl)benzenesulfonamide, **1a****

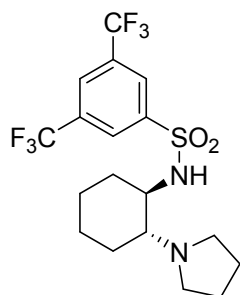

According to the general procedure using 0.605 g (3.59 mmol) of (1*R*,2*R*)-2-(1-pyrrolidinyl)cyclohexylamine and 1.24 g (3.96 mmol, 1.1 equiv) of 3,5-bis(trifluoromethyl)benzenesulfonyl chloride, 1.50 g of product was obtained as orange oil (94% yield).

$R_f = 0.515$  ( $\text{CH}_2\text{Cl}_2/\text{MeOH}$  10:1 v:v);  $[\alpha]_D^{22} = -66.2$  ( $c$  1.00,  $\text{CH}_2\text{Cl}_2$ );  $^1\text{H}$  NMR (600 MHz,  $\text{CDCl}_3$ , TMS)  $\delta$  8.33 (s, 2H), 8.07 (s, 1H), 4.8 (br., 1H), 2.75 (td,  $J = 10.4, 4.1$  Hz, 1H), 2.46 (td,  $J = 10.3, 2.6$  Hz, 1H), 2.38 – 2.42 (m, 2H), 2.28 – 2.32 (m, 1H), 2.18 – 2.23 (m, 2H), 1.75 – 1.80 (m, 2H), 1.64 – 1.70 (m, 3H), 1.55 – 1.62 (m, 2H), 1.10 – 1.24 (m, 4H);  $^{13}\text{C}$  NMR (151 MHz,  $\text{CDCl}_3$ )  $\delta$  143.5, 132.8 (q,  $J_{\text{C-F}} = 34.5$  Hz), 127.4 (m), 125.9 (m), 122.5 (q,  $J_{\text{C-F}} = 273$  Hz), 61.5, 55.8, 46.6, 32.5, 24.9, 24.1, 23.5, 21.7;  $^{19}\text{F}$  NMR (376 MHz,  $\text{CDCl}_3$ )  $\delta$  -62.84 (s, 6F); HRMS (ESI-TOF) calcd. for  $[\text{C}_{18}\text{H}_{22}\text{F}_6\text{N}_2\text{O}_2\text{S}+\text{H}]^+$  445.1379 found 445.1384

***N*-((1*R*,2*R*)-2-(Azepan-1-yl)cyclohexyl)-3,5-bis(trifluoromethyl)benzenesulfonamide, **3a****

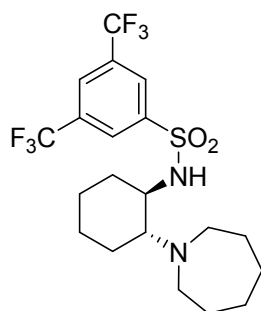

According to the general procedure using 0.203 g (1.04 mmol) of (1*R*,2*R*)-2-(1-azepanyl)cyclohexylamine and 0.356 g (1.14 mmol, 1.1 equiv) of 3,5-bis(trifluoromethyl)benzenesulfonyl chloride, 0.374 g of product was obtained after recrystallization from 2-propanol as white solid (76% yield).

mp 116.6 – 119.0  $^\circ\text{C}$  (2-propanol);  $[\alpha]_D^{23} = -55.6$  ( $c$  1.00,  $\text{CH}_2\text{Cl}_2$ );  $^1\text{H}$  NMR (600 MHz,  $\text{CDCl}_3$ , TMS)  $\delta$  8.35 (s, 2H), 8.06 (s, 1H), 5.6 (br., 1H), 2.88 (td,  $J = 10.3, 4.1$  Hz, 1H), 2.34 – 2.52 (m, 4H), 2.21 – 2.30 (m, 2H), 1.72 – 1.83 (m, 2H), 1.62 – 1.69 (m, 1H), 1.48 – 1.61 (m, 6H), 1.44 (br., 2H), 1.11 – 1.22 (m, 4H);  $^{13}\text{C}$  NMR (151 MHz,  $\text{CDCl}_3$ )  $\delta$  144.0, 132.9 (q,  $J_{\text{C-F}} = 34.6$  Hz), 127.5 (m), 126.0 (quin.,  $J_{\text{C-F}} = 3.5$  Hz), 122.7 (q,  $J_{\text{C-F}} = 273$  Hz), 68.7, 54.8, ~50 (br.), 32.5, 29.4, 26.9, 25.4, 24.2, 23.5;  $^{19}\text{F}$  NMR (376 MHz,  $\text{CDCl}_3$ )  $\delta$  -62.81 (s, 6F); HRMS (ESI-TOF) calcd. for  $[\text{C}_{20}\text{H}_{26}\text{F}_6\text{N}_2\text{O}_2\text{S}+\text{H}]^+$  473.1692 found 473.1702

***N*-((1*R*,2*R*)-2-(Morpholin-4-yl)cyclohexyl)-3,5-bis(trifluoromethyl)benzenesulfonamide, **3a****

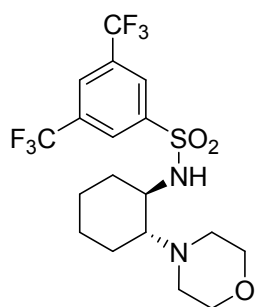

According to the general procedure using 0.402 g (2.18 mmol) of (1*R*,2*R*)-2-(4-morpholinyl)cyclohexylamine and 0.750 g (2.40 mmol, 1.1 equiv) of 3,5-bis(trifluoromethyl)benzenesulfonyl chloride, 0.786 g of product was obtained after recrystallization from 2-propanol as white solid (78% yield).

mp 103.6 – 106.4 °C (2-propanol);  $[\alpha]_{\text{D}}^{23} = -71.9$  ( $c$  0.997,  $\text{CH}_2\text{Cl}_2$ );  $^1\text{H}$  NMR (600 MHz,  $\text{CDCl}_3$ , TMS)  $\delta$  8.34 (s, 2H), 8.07 (s, 1H), 6.29 (br., 1H), 3.62 – 3.66 (m, 2H), 3.56 (br., 2H), 2.94 (td,  $J = 10.3, 4.1$  Hz, 1H), 2.30 – 2.42 (m, 4H), 2.19 – 2.28 (m, 2H), 1.85 – 1.90 (m, 1H), 1.78 – 1.83 (m, 1H), 1.65 – 1.69 (m, 1H), 1.11 – 1.22 (m, 4H);  $^{13}\text{C}$  NMR (151 MHz,  $\text{CDCl}_3$ )  $\delta$  143.9, 133.0 (q,  $J_{\text{C-F}} = 34.5$  Hz), 127.4 (m), 126.2 (quin,  $J_{\text{C-F}} = 3.4$  Hz), 122.6 (q,  $J_{\text{C-F}} = 274$  Hz), 67.2, 66.9, 53.7, 48.2, 32.6, 25.1, 24.1, 22.9;  $^{19}\text{F}$  NMR (376 MHz,  $\text{CDCl}_3$ )  $\delta$  -62.80 (s, 6F).

***N*-((1*R*,2*R*)-2-(dimethylamino)cyclohexyl)-3,5-bis(trifluoromethyl)benzenesulfonamide, 5a<sup>S7</sup>**

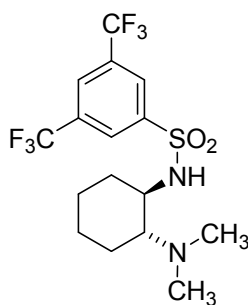

According to the general procedure using 0.303 g (2.13 mmol) of (1*R*,2*R*)-2-(*N,N*-dimethylamino)cyclohexylamine<sup>S9</sup> and 0.733 g (2.34 mmol, 1.1 equiv) of 3,5-bis(trifluoromethyl)benzenesulfonyl chloride, 0.923 g of product was obtained as crude solid (quantitative yield). Spectra were in accordance with literature data.<sup>S7</sup>

$^{19}\text{F}$  NMR (376 MHz,  $\text{CDCl}_3$ ; label: MD-160A-cr)  $\delta$  -62.86 (s, 6H).

***N*-((1*R*,2*R*)-2-(Morpholin-4-yl)cyclohexyl)-3,5-di(methylsulfonyl)benzenesulfonamide, 4c**

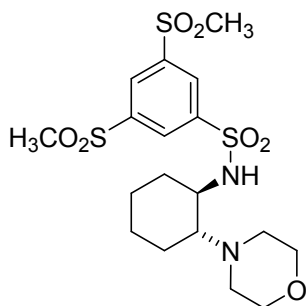

According to the general procedure using 0.178 g (0.968 mmol, 1.0 equiv) of (1*R*,2*R*)-2-(morpholin-4-yl)cyclohexylamine and 0.354 g (1.07 mmol, 1.1 equiv) of 3,5-bis(methylsulfonyl)benzenesulfonyl chloride, 0.323 g of product was obtained after recrystallization from *sec*-butanol as white solid (69% yield).

mp 168 – 171 °C (*sec*-butanol);  $^1\text{H}$  NMR (600 MHz,  $\text{CDCl}_3$ , TMS)  $\delta$  8.69 (d,  $J = 1.5$  Hz, 2H), 8.67 (t,  $J = 1.4$  Hz, 1H), 6.42 (br., 1H), 3.65 – 3.70 (m, 2H), 3.56 – 3.62 (m, 2H), 3.20 (s, 6H), 3.09 (td,  $J =$

<sup>S9</sup> Kaik, K.; Gawroński, J. *Tetrahedron: Asymmetry* **2003**, *14*, 1559-1563.



10.5, 4.0 Hz, 1H), 2.48 (br., 2H), 2.33 – 2.39 (m, 2H), 2.22 (td,  $J = 10.5, 3.0$  Hz, 1H), 2.14 – 2.19 (m, 1H), 1.86 – 1.91 (m, 1H), 1.78 – 1.82 (m, 1H), 1.62 – 1.67 (m, 1H), 1.08 – 1.22 (m, 4H);  $^{13}\text{C}$  NMR (151 MHz,  $\text{CDCl}_3$ ; label)  $\delta$  145.5, 143.8, 130.6, 129.9, 67.3, 66.8, 53.8, 48.3, 44.3, 32.5, 25.1, 24.0, 22.9;

### ***N*-((1*R*,2*R*)-2-(Pyrrolidin-1-yl)cyclohexyl)-2-fluorobenzenesulfonamide, 1m**

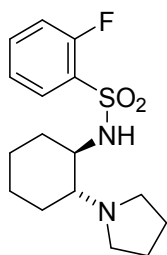

According to the general procedure using 0.542 g (3.22 mmol) of (1*R*,2*R*)-2-(1-pyrrolidinyl)cyclohexylamine and 0.718 g (3.69 mmol, 1.1 equiv) of 2-fluorobenzenesulfonyl chloride, 0.737 g of product was obtained after recrystallization from 2-propanol as yellow solid (70% yield).

mp 89.3 – 92.3 °C (2-propanol);  $[\alpha]_{\text{D}}^{23} = -117.3$  ( $c$  1.00,  $\text{CH}_2\text{Cl}_2$ );  $^1\text{H}$  NMR (600 MHz,  $\text{CDCl}_3$ , TMS)  $\delta$  7.92 (td,  $J = 7.5, 1.8$  Hz, 1H), 7.55 – 7.59 (m, 1H), 7.28 (td,  $J = 7.6, 1.0$  Hz, 1H), 7.18 – 7.21 (m, 1H), 6.4 (br., 1H), 2.65 (td,  $J = 10.4, 3.9$  Hz, 1H), 2.41 – 2.49 (m, 2H), 2.35 – 2.40 (m, 2H), 2.19 – 2.25 (m, 2H), 1.79 – 1.77 (m, 2H), 1.62 – 1.70 (m, 4H), 1.23 – 1.31 (m, 1H), 1.07 – 1.22 (m, 4H);  $^{13}\text{C}$  NMR (151 MHz,  $\text{CDCl}_3$ )  $\delta$  159.2 (d,  $J_{\text{C-F}} = 256$  Hz), 134.9 (d,  $J_{\text{C-F}} = 8.2$  Hz), 130.8, 127.8 (d,  $J_{\text{C-F}} = 13.8$  Hz), 124.4 (d,  $J_{\text{C-F}} = 3.8$  Hz), 116.8 (d,  $J_{\text{C-F}} = 21.2$  Hz), 61.5, 55.5, 46.9, 32.9, 25.0, 24.2, 23.4, 22.0;  $^{19}\text{F}$  NMR (376 MHz,  $\text{CDCl}_3$ )  $\delta$  -109.49 – (-108.80) (m, 1F); HRMS (ESI-TOF) calcd. for  $[\text{C}_{16}\text{H}_{23}\text{FN}_2\text{O}_2\text{S}+\text{H}]^+$  327.1537 found 327.1545

### ***N*-((1*R*,2*R*)-2-(Azepan-1-yl)cyclohexyl)-2-fluorobenzenesulfonamide, 3m**

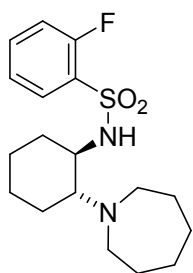

According to the general procedure using 0.190 g (0.965 mmol) of (1*R*,2*R*)-2-(1-azepanyl)cyclohexylamine and 0.211 g (1.08 mmol, 1.1 equiv) of 2-fluorobenzenesulfonyl chloride, 0.320 g of product was obtained as orange oil (94% yield).

$R_f = 0.413$  ( $\text{CH}_2\text{Cl}_2/\text{MeOH}$  10:1 v:v);  $[\alpha]_{\text{D}}^{24} = -65.6$  ( $c$  1.00,  $\text{CH}_2\text{Cl}_2$ );  $^1\text{H}$  NMR (600 MHz,  $\text{CDCl}_3$ , TMS)  $\delta$  7.92 (td,  $J = 7.7, 1.8$  Hz, 1H), 7.53 – 7.58 (m, 1H), 7.27 (td,  $J = 7.8, 1.0$  Hz, 1H), 7.19 (ddd,  $J = 9.6, 8.4, 1.0$  Hz, 1H), 6.37 (br., 1H), 2.84 (td,  $J = 10.2, 3.7$  Hz, 1H), 2.44 – 2.51 (m, 2H), 2.34 – 2.43 (m, 3H), 2.24 – 2.28 (m, 1H), 1.47 – 1.79 (m, 11 H), 1.09 – 1.25 (m, 4H);  $^{13}\text{C}$  NMR (151 MHz,  $\text{CDCl}_3$ ; label: MD-091A-cr)  $\delta$  159.2 (d,  $J_{\text{C-F}} = 255$  Hz), 134.8 (d,  $J_{\text{C-F}} = 8$  Hz), 130.5, 128.6, 124.4 ( $J_{\text{C-F}} = 3$  Hz), 117.1 ( $J_{\text{C-F}} = 21$  Hz), 69.0, 54.3, 51.1 (br.), 32.6, 29.0, 27.0, 25.5, 24.3, 23.6;  $^{19}\text{F}$  NMR (376 MHz,  $\text{CDCl}_3$ ; label: MD-091A-cr)  $\delta$  -108.35 – (-108.27) (m, 1F); HRMS (ESI-TOF) calcd. for  $[\text{C}_{18}\text{H}_{27}\text{FN}_2\text{O}_2\text{S}+\text{H}]^+$  355.1850 found 327. 355.1855

### ***N*-((1*R*,2*R*)-2-(Morpholin-4-yl)cyclohexyl)-2-fluorobenzenesulfonamide 4m**

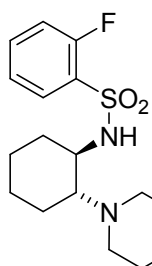

According to the general procedure using 0.402 g (2.18 mmol) of (1*R*,2*R*)-2-(4-morpholinyl)cyclohexylamine and 0.478 g (2.46 mmol, 1.1 equiv) of 2-fluorobenzenesulfonyl chloride, 0.582 g of product was obtained as white solid after recrystallization from 2-propanol (78% yield).

mp 115.5 – 118.0 °C (2-propanol);  $[\alpha]_D^{24} = -126.0$  ( $c$  0.997, CH<sub>2</sub>Cl<sub>2</sub>); <sup>1</sup>H NMR (600 MHz, CDCl<sub>3</sub>, TMS)  $\delta$  7.92 (td,  $J = 7.5, 1.6$  Hz, 1H), 7.57 – 7.61 (m, 1H), 7.30 (td,  $J = 7.6, 0.6$  Hz, 1H), 7.18 – 7.22 (m, 1H), 6.30 (br., 1H), 3.58 – 3.65 (m, 4H), 2.73 (td,  $J = 10.6, 4.1$  Hz, 1H), 2.44 – 2.49 (m, 1H), 2.26 – 2.33 (m, 4H), 2.18 – 2.23 (m, 1H), 1.82 – 1.87 (m, 1H), 1.74 – 1.79 (m, 1H), 1.63 – 1.67 (m, 1H), 1.25 – 1.32 (m, 1H), 1.05 – 1.23 (m, 3H); <sup>13</sup>C NMR (151 MHz, CDCl<sub>3</sub>)  $\delta$  158.9 (d,  $J_{C-F} = 255$  Hz), 135.1 (d,  $J_{C-F} = 8.2$  Hz), 130.8, 127.7 (d,  $J_{C-F} = 13.8$  Hz), 124.6 (d,  $J_{C-F} = 3.8$  Hz), 116.9 (d,  $J_{C-F} = 21.0$  Hz), 67.07, 67.06, 53.3, 48.5, 32.9, 25.2, 24.1, 22.9; <sup>19</sup>F NMR (376 MHz, CDCl<sub>3</sub>)  $\delta$  -108.75 – (-108.67) (m, 1F);

### ***N*-((1*R*,2*R*)-2-(Azepan-1-yl)cyclohexyl)-pentafluorobenzenesulfonamide,**

**3p**

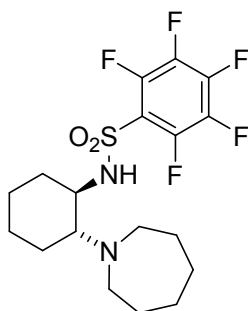

According to the general procedure using 0.199 g (1.01 mmol) of (1*R*,2*R*)-2-(1-azepanyl)cyclohexylamine and 0.165 mL (1.11 mmol, 1.1 equiv) of pentafluorobenzenesulfonyl chloride, 0.300 g of product was obtained after recrystallization from 2-propanol as white solid (70% yield).

mp 149.1 – 152.3 °C (2-propanol);  $[\alpha]_D^{23} = -54.5$  ( $c$  1.00, CH<sub>2</sub>Cl<sub>2</sub>); <sup>1</sup>H NMR (600 MHz, CDCl<sub>3</sub>, TMS)  $\delta$  5.2 (br., 1H), 2.99 – 3.05 (m, 1H), 2.54 – 2.60 (m, 2H), 2.38 – 2.51 (m, 3H), 2.25 – 2.31 (m, 1H), 1.81 – 1.85 (m, 1H), 1.74 – 1.79 (m, 1H), 1.65 – 1.69 (m, 1H), 1.51 – 1.63 (m, 8H), 1.16 – 1.25 (m, 4H); <sup>13</sup>C NMR (151 MHz, CDCl<sub>3</sub>)  $\delta$  68.9, 54.9, 51.4, 32.0, 29.0, 26.9, 25.4, 24.2, 23.6; <sup>13</sup>C{<sup>19</sup>F} NMR (101 MHz, CDCl<sub>3</sub>)  $\delta$  144.6, 143.7, 137.9, 117.2; <sup>19</sup>F NMR (376 MHz, CDCl<sub>3</sub>)  $\delta$  -135.70 – (-135.58) (m, 2F), -146.59 (tt,  $J = 21.0, 6.1$  Hz, 1F), -158.89 – (-158.73) (m, 2F); HRMS (ESI-TOF) calcd. for [C<sub>18</sub>H<sub>23</sub>F<sub>5</sub>N<sub>2</sub>O<sub>2</sub>S+H]<sup>+</sup> 427.1473 found 427.1476.

### ***N*-((1*R*,2*R*)-2-(Morpholin-4-yl)cyclohexyl)-pentafluorobenzenesulfonamide, 4p**

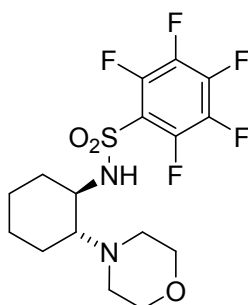

According to the general procedure using 0.402 g (2.18 mmol) of (1*R*,2*R*)-2-(4-morpholinyl)cyclohexylamine and 0.356 mL (2.40 mmol, 1.1 equiv) of

pentafluorobenzenesulfonyl chloride, 0.701 g of product was obtained after recrystallization from 2-propanol as white solid (78% yield).

mp 161.4 – 163.6 °C (2-propanol);  $[\alpha]_D^{20} = -86.6$  ( $c$  0.997,  $\text{CH}_2\text{Cl}_2$ );  $^1\text{H}$  NMR (600 MHz,  $\text{CDCl}_3$ , TMS)  $\delta$  6.59 (br., 1H), 3.61 – 3.71 (m, 4H), 3.00 (td,  $J = 10.6, 4.0$  Hz, 1H), 2.41 – 2.49 (m, 3H), 2.36 – 2.40 (m, 2H), 2.23 (td,  $J = 10.9, 2.9$  Hz, 1H), 1.88 – 1.93 (m, 1H), 1.80 – 1.84 (m, 1H), 1.67 – 1.72 (m, 1H), 1.14 – 1.31 (m, 4H);  $^{13}\text{C}$  NMR (151 MHz,  $\text{CDCl}_3$ )  $\delta$  67.2, 67.1, 53.8, 48.4, 32.3, 25.1, 24.1, 23.0;  $^{13}\text{C}\{^{19}\text{F}\}$  NMR (101 MHz,  $\text{CDCl}_3$ ) 144.6, 143.8, 137.9, 117.2;  $^{19}\text{F}$  NMR (376 MHz,  $\text{CDCl}_3$ )  $\delta$  -135.98 – (-135.85) (m, 2F), -145.80 (tt,  $J = 21.0, 6.2$  Hz, 1F), -158.54 – (-158.37) (m, 2F);

#### ***N*-((1*R*,2*R*)-2-(Pyrrolidin-1-yl)cyclohexyl)-methanesulfonamide, 1t**

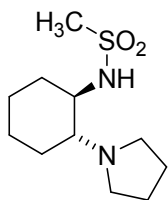

According to the general procedure using 0.534 g (3.20 mmol) of (1*R*,2*R*)-2-(1-pyrrolidinyl)cyclohexylamine and 0.300 mL (3.88 mmol, 1.1 equiv) of methanesulfonyl chloride, 0.355 g of product was obtained after recrystallization from 2-propanol as white solid (45% yield).

mp 95.5 – 97.8°C (2-propanol);  $[\alpha]_D^{22} = -101.5$  ( $c$  1.01,  $\text{CH}_2\text{Cl}_2$ );  $^1\text{H}$  NMR (600 MHz,  $\text{CDCl}_3$ , TMS)  $\delta$  5.9 (br., 1H), 3.12 (td,  $J = 10.1, 4.2$  Hz, 1H), 2.97 (s, 3H), 2.60 – 2.65 (m, 2H), 2.51 – 2.55 (m, 2H), 2.43 – 2.48 (m, 1H), 2.37 – 2.41 (m, 1H), 1.80 – 1.85 (m, 2H), 1.69 – 1.77 (m, 5H), 1.23 – 1.31 (m, 4H);  $^{13}\text{C}$  NMR (151 MHz,  $\text{CDCl}_3$ )  $\delta$  61.5, 55.6, 46.8, 41.9, 32.8, 25.0, 24.2, 23.7, 21.7; HRMS (ESI-TOF) calcd. for  $[\text{C}_{11}\text{H}_{22}\text{N}_2\text{O}_2\text{S}+\text{H}]^+$  247.1474 found 247.1482.

#### ***N*-((1*R*,2*R*)-2-(Azepan-1-yl)cyclohexyl)-methanesulfonamide, 3t**

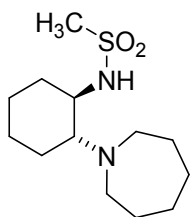

According to the general procedure using 146 mg (0.741 mmol) of (1*R*,2*R*)-2-(1-azepanyl)cyclohexylamine and 63  $\mu\text{L}$  (0.814 mmol, 1.1 equiv) of methanesulfonyl chloride, 83 mg of product was obtained after recrystallization from 2-propanol as white solid (41% yield).

mp 119.3 – 121.1 °C (2-propanol);  $[\alpha]_D^{22} = -68.9$  ( $c$  1.00,  $\text{CH}_2\text{Cl}_2$ );  $^1\text{H}$  NMR (600 MHz,  $\text{CDCl}_3$ , TMS)  $\delta$  6.05 (br., 1H), 3.13 (td,  $J = 10.2, 4.2$  Hz, 1H), 2.97 (s, 3H), 2.70 – 2.75 (m, 2H), 2.43 – 2.51 (m, 2H), 2.36 – 2.41 (m, 1H), 2.21 – 2.26 (m, 1H), 1.82 – 1.87 (m, 1H), 1.77 – 1.82 (m, 1H), 1.53 – 1.72 (m, 9H), 1.20 – 1.30 (m, 4H);  $^{13}\text{C}$  NMR (151 MHz,  $\text{CDCl}_3$ )  $\delta$  68.6, 54.5, ~50 (br.), 42.4, 32.7, 29.6, 26.9, 25.5, 24.3, 23.5; HRMS (ESI-TOF) calcd. for  $[\text{C}_{13}\text{H}_{26}\text{N}_2\text{O}_2\text{S}+\text{H}]^+$  275.1788 found 275.1783.

### *N*-((1*R*,2*R*)-2-(Morpholin-4-yl)cyclohexyl)-methanesulfonamide, **4t**

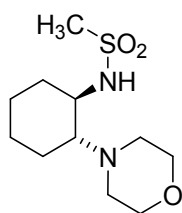

According to the general procedure using 0.402 g (2.18 mmol) of (1*R*,2*R*)-2-(4-morpholinyl)cyclohexylamine and 0.186 mL (2.40 mmol, 1.1 equiv) of methanesulfonyl chloride, 0.483 g of product was obtained after recrystallization from 2-propanol as white solid (85% yield).

mp 141.7 – 143.8 °C (2-propanol);  $[\alpha]_{\text{D}}^{23} = -85.4$  ( $c$  1.01,  $\text{CH}_2\text{Cl}_2$ );  $^1\text{H}$  NMR (600 MHz,  $\text{CDCl}_3$ , TMS)  $\delta$  5.79 (br., 1H), 3.64 – 3.75 (m, 4H), 3.22 (td,  $J = 10.3, 4.2$  Hz, 1H), 2.98 (s, 3H), 2.64 – 2.70 (m, 2H), 2.36 – 2.41 (m, 3H), 2.19 (td,  $J = 10.9, 3.3$  Hz, 1H), 1.89 – 1.94 (m, 1H), 1.82 – 1.86 (m, 1H), 1.69 – 1.73 (m, 1H), 1.21 – 1.31 (m, 4H);  $^{13}\text{C}$  NMR (151 MHz,  $\text{CDCl}_3$ )  $\delta$  67.4, 66.9, 53.3, 48.3, 42.6, 32.9, 25.3, 24.1, 22.9.

### Catalysts **6-8**

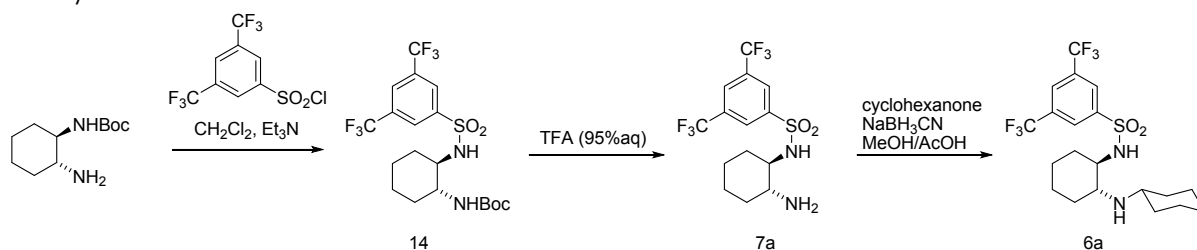

**Scheme S1.** Synthesis of **6a** and **7a**

### *N*-((1*R*,2*R*)-2-(*tert*-Butyloxycarbonylamino)cyclohexyl)-3,5-

### bis(trifluoromethyl)benzenesulfonamide, **14**

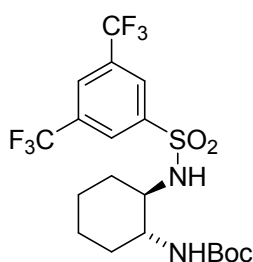

According to the general procedure using 0.437 g (2.04 mmol) of *tert*-butyl ((1*R*,2*R*)-2-aminocyclohexyl)carbamate and 0.701 g (2.24 mmol, 1.1 equiv) of 3,5-bis(trifluoromethyl)benzenesulfonyl chloride, 0.877 g (89% yield) of product was obtained and used further without purification.

$^1\text{H}$  NMR (600 MHz,  $\text{CDCl}_3$ , TMS)  $\delta$  8.31 (s, 2H), 8.04 (s, 1H), 6.35 (s, 1H), 4.52 (br., 1H), 3.30 – 3.41 (m, 1H), 3.04 – 3.10 (m, 1H), 1.93 – 2.00 (m, 2H), 1.63 – 1.77 (m, 2H), 1.40 (s, 9H), 1.16 – 1.31 (m, 4H);  $^{13}\text{C}$  NMR (101 MHz,  $\text{CDCl}_3$ )  $\delta$  157.6, 145.0, 132.7 (q,  $J_{\text{C-F}} = 34$  Hz), 127.0 – 127.2 (m), 125.7 (quint.  $J_{\text{C-F}} = 3$  Hz), 122.6 (q,  $J_{\text{C-F}} = 274$  Hz), 80.8, 60.8, 53.4, 33.8, 32.4, 28.2, 24.6, 24.2;  $^{19}\text{F}$  NMR (376 MHz,  $\text{CDCl}_3$ )  $\delta$  -62.72 (s, 6F).

***N*-((1*R*,2*R*)-2-aminocyclohexyl)-3,5-bis(trifluoromethyl)benzenesulfonamide, **6a****<sup>S10</sup>

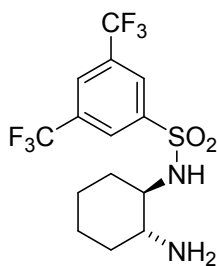

Boc-sulfonamide **14** (0.877 g, 1.79 mmol) was dissolved in 95% aqueous solution of trifluoroacetic acid (10 mL) and stirred at RT for 17 h. The solution was concentrated *in vacuo*, and the residue dissolved in a mixture of aqueous NaHCO<sub>3</sub> (10%, 25 mL) and DCM (25 mL). The mixture was alkalinized with excess of NaOH and phases were separated. Aqueous phase was extracted with DCM (2 × 10 mL) and combined organic phases were dried over Na<sub>2</sub>SO<sub>4</sub>, and concentrated *in vacuo* to obtain 0.596 g of product as orange oil (85% yield). Spectra were in accordance to literature data.<sup>S10</sup>

<sup>19</sup>F NMR (376 MHz, CDCl<sub>3</sub>; label: MD-141A-cr) δ -62.94 (s, 6F).

***N*-((1*R*,2*R*)-2-(*N*-cyclohexylamino)cyclohexyl)-3,5-bis(trifluoromethyl)benzenesulfonamide, **7a****

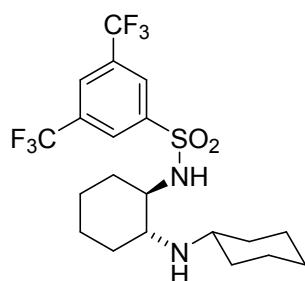

Amine **6a** (0.201 g, 0.649 mmol) was dissolved in MeOH (2.7 mL) and cyclohexanone (0.201 mL, 1.95 mmol, 3.0 equiv) was added followed by acetic acid (0.606 mL). The mixture was stirred at RT for 30 minutes and sodium cyanoborohydride was added portionwise (102 mg, 1.62 mmol, 2.5 equiv) and the solution was stirred at RT for 22 h. The mixture was concentrated *in vacuo*, residues were alkalinized with 10 mL of saturated NaOH. The mixture was extracted with dichloromethane (3 × 10 mL). The combined extracts were dried over K<sub>2</sub>CO<sub>3</sub>, and evaporated to obtain 0.199 g of white solid (85% yield).

Mp 134-138 °C; <sup>1</sup>H NMR (600 MHz, CDCl<sub>3</sub>, TMS) δ 8.37 (s, 2H), 8.08 (s, 1H), 2.48 – 2.53 (m, 2H), 2.28 (td, *J* = 10.6, 3.7 Hz, 1H), 2.21 – 2.26 (m, 1H), 2.11 – 2.16 (m, 1H), 1.83 – 1.88 (m, 1H), 1.66 – 1.76 (m, 4H), 1.61 – 1.65 (m, 1H), 1.55 – 1.60 (m, 1H), 1.12 – 1.32 (m, 7H), 1.02 – 1.08 (m, 1H), 0.92 – 0.98 (m, 1H), 0.84 – 0.90 (m, 1H) (1 signal for NH observed due to coalescence); <sup>13</sup>C NMR (151 MHz, CDCl<sub>3</sub>) δ 143.3, 132.7 (q, *J*<sub>C-F</sub> = 34.3 Hz), 127.6 (m), 125.9 (m), 122.6 (q, *J*<sub>C-F</sub> = 273 Hz), 58.7, 57.2, 53.1, 34.9, 33.5, 32.5, 32.4, 25.9, 25.0 (overlapping 2 signals), 24.5, 24.2; <sup>19</sup>F NMR (376 MHz, CDCl<sub>3</sub>) δ -62.77 (s, 6F).

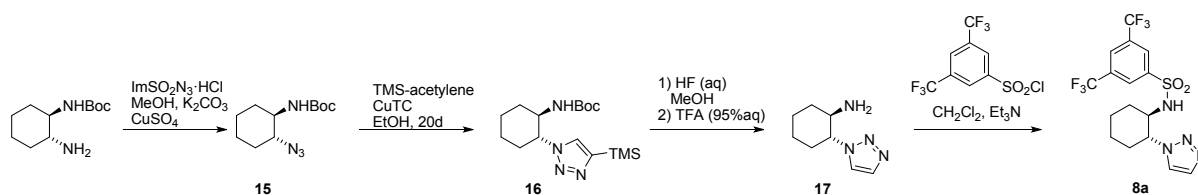

<sup>10</sup> Feng, Y.; Zhichao, J.; Huicai, H.; Tingting, Y.; Jinxing, L. Xinmiao Y. *Org. Biomol. Chem.* **2010**, *8*, 4767-4774.

**Scheme S2.** Synthesis of **8a**.

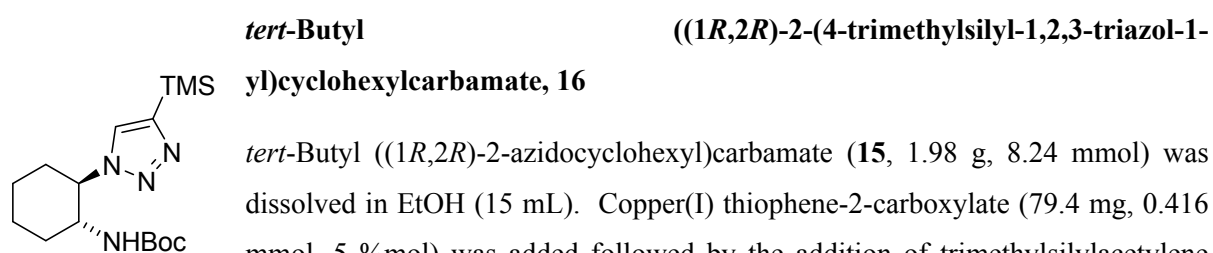

*tert*-Butyl ((1*R*,2*R*)-2-azidocyclohexyl)carbamate (**15**, 1.98 g, 8.24 mmol) was dissolved in EtOH (15 mL). Copper(I) thiophene-2-carboxylate (79.4 mg, 0.416 mmol, 5 %mol) was added followed by the addition of trimethylsilylacetylene (3.0 mL, 21.7 mmol, 2.6 equiv). The suspension was stirred at room temperature for 480 h. Then 20 mg of NaHS was added and mixture was stirred vigorously. The suspension was filtered through layer of silica gel and washed with a mixture of DCM/EtOH (2:1 v:v, 75 mL), the solution was concentrated *in vacuo*. The residue was redissolved in ca. 10 mL of AcOEt and filtered through layer of silica gel and eluted with AcOEt (110 mL). After concentration *in vacuo*. 2.22 g of crude product **16** was obtained as white solid also containing product **17** without TMS group (approx. 80% yield).

**(1R,2R)-2-(1,2,3-triazol-1-yl)cyclohexylamine, 17**

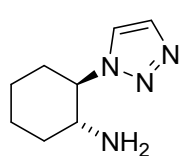

Crude *tert*-Butyl ((1*R*,2*R*)-2-(4-trimethylsilyl-1,2,3-triazol-1-yl)cyclohexyl)carbamate (**16**, 0.202 g, 0.598 mmol) was dissolved in MeOH (3.7 mL) in a polypropylene tube and 40% aqueous solution of HF (0.5 mL) was added slowly, and the mixture was stored at room temperature for 2 h. The solution was alkalinized by carefully adding saturated aqueous NaHCO<sub>3</sub>, and extracted with dichloromethane (3 × 7 mL), dried over Na<sub>2</sub>SO<sub>4</sub> and evaporated. In the residue, TMS group was completely removed and approx. 5% of Boc groups were cleaved. The mixture was dissolved in 95% aqueous solution of trifluoroacetic acid (10 mL) and stirred at room temperature for 20 h and concentrated *in vacuo*. The residue was alkalinized by saturated aqueous solution of NaHCO<sub>3</sub> (10 mL) and solid NaOH to pH > 13 and extracted with dichloromethane (4 × 10 mL), dried over Na<sub>2</sub>SO<sub>4</sub> and evaporated. The product was obtained as orange oil (37.5 mg, 38% yield).

<sup>1</sup>H NMR (400 MHz, CDCl<sub>3</sub>, TMS) δ 7.73 (d, *J* = 1.0 Hz, 1H), 7.60 (d, *J* = 1.0 Hz, 1H), 4.10 (ddd, *J* = 12.2, 10.0, 4.2 Hz, 1H), 3.19 (ddd, *J* = 11.1, 10.1, 4.2 Hz, 1H), 2.04 – 2.14 (m, 2H), 1.82 – 1.96 (m, 3H), 1.24-1.54 (m, 5H).

***N*-((1R,2R)-2-(1,2,3-triazol-1-yl)cyclohexyl)-3,5-bis(trifluoromethyl)benzenesulfonamide, 8a,**

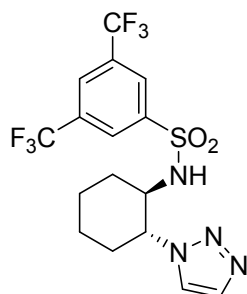

According to the general procedure using 35.0 mg (0.211 mmol) of (1*R*,2*R*)-2-(1,2,3-triazol-1-yl)cyclohexylamine and 72.4 mg (0.232 mmol, 1.1 equiv) of

3,5-bis(trifluoromethyl)benzenesulfonyl chloride, 62.1 mg of product was obtained as orange oil (67% yield).

$^1\text{H}$  NMR (600 MHz,  $\text{CDCl}_3$ , TMS)  $\delta$  8.09 (s, 2H), 8.00 (s, 1H), 7.49 (s, 1H), 7.44 (s, 1H), 6.40 (d,  $J = 8.2$  Hz, 1H), 4.48 (td,  $J = 11.4, 3.7$  Hz, 1H), 3.59 – 3.65 (m, 1H), 2.11 – 2.21 (m, 2H), 1.84 – 1.95 (m, 3H), 1.57 – 1.64 (m, 1H), 1.41 – 1.51 (m, 2H);  $^{13}\text{C}$  NMR (151 MHz,  $\text{CDCl}_3$ )  $\delta$  143.9, 133.6, 132.7 (q,  $J_{\text{C-F}} = 34.3$  Hz), 126.8 (m), 126.0 (m), 122.5 (q,  $J_{\text{C-F}} = 274$  Hz), 122.0, 63.2, 58.1, 34.2, 32.8, 24.6, 24.5;  $^{19}\text{F}$  NMR (376 MHz,  $\text{CDCl}_3$ )  $\delta$  -62.80 (s, 6F).

General procedure for Michael-hemiacetalization reaction

Diketone **9** (0.1 mmol, 1 equiv, 19 mg for methyl benzylidenepyruvate **9a**) and the catalyst (0.01 mmol, 10 %mol, 4.5 mg for **2a**) were dissolved in 1 mL of solvent (chlorobenzene), and stirred at room temperature for 15 minutes. Then, the mixture was brought to the desired temperature (room temperature, -20 °C, or -40 °C) and nucleophile was added (0.11 mmol, 1.1 equiv, 15.4 mg for dimedone, **10**). The mixture was stirred at that temperature for 1 day (or up to 5 days for reactions performed at low temperatures). Then 1.5 mL of chloroform was added, and the mixture was passed through a pad of silica gel (15 g) and eluted with 100 mL ethyl acetate. The solution was evaporated to yield essentially pure product **11** for which enantiomeric composition was determined by chiral HPLC.

Analytically pure samples were obtained by chromatography on silica gel with hexane/AcOEt/ $\text{CH}_2\text{Cl}_2$  7:3:1 (v/v/v). Column was loaded with a sample dissolved in  $\text{CH}_2\text{Cl}_2$ . Chromatography did not change enantiomeric composition.

For reactions requiring less than 3 mg of catalyst, the required catalyst was added as a solution in the reaction solvent.

The reaction was repeated on a 3-mmol scale by multiplying all the quantities by 30. However, the workup included filtration through a pad of silica gel (20 g) and elution with 150 mL of ethyl acetate. Product was purified by chromatography as described above.

Note on NMR and HPLC chromatograms of hemiacetal products **11**

The Michael addition end products **11** were all (as reported in the literature for known examples **11a**, **11c**, **11f**, **11g**, and **11h**) mixtures of the cyclic and linear anomers in equilibrium. This process was slow on an NMR timescale and presented as separate compounds in  $^1\text{H}$  and  $^{13}\text{C}$  NMR spectroscopy (Figures S76-S85), but fast enough that they did not resolve by HPLC chromatography (Figures S88-S99). (See ref. 11 from main text: Calter, P. A.; Wang, J. *Org. Lett.* **2009**, *11*, 2205–2208).

In some HPLC chromatograms partial resolution of epimeric hemiacetals was observed as peak asymmetry or partially overlapped peaks. The extent of resolution of anomers depended on the solvent from which the sample was dissolved prior to injection.. More symmetrical peaks were observed for samples dissolved in 2-propanol. The observed ratio of enantiomers was unaffected.

Catalytic products:

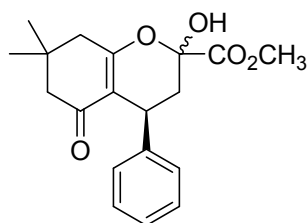

**Methyl (4S)-2-hydroxy-7,7-dimethyl-5-oxo-4-phenyl-3,4,5,6,7,8-hexahydro-2H-chromene-2-carboxylate 11a**

$[\alpha]_D^{22} = +14.8$  (*c* 0.85, CH<sub>2</sub>Cl<sub>2</sub>; >99 %ee);

HPLC AD-H, 7:3, 1 mL/min,  $\lambda = 254$  nm; *tr* = 6.5 – 7 (minor), 10.5 (major);

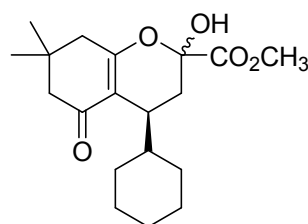

**Methyl (4S)-4-cyclohexyl-2-hydroxy-7,7-dimethyl-5-oxo-3,4,5,6,7,8-hexahydro-2H-chromene-2-carboxylate, 11b**

Modification of the general procedure (increased time, 96h), product (45 % yield) was obtained as a colorless oil. Product was found to decompose on standing and during purification on silica gel.

$[\alpha]_D^{23} = 0$  (*c* 0.1, CH<sub>2</sub>Cl<sub>2</sub>; 78 %ee); <sup>1</sup>H NMR (400 MHz, CDCl<sub>3</sub>, TMS)  $\delta$  4.74 (br., 0.3H), 4.42 (br., 0.45H), 3.90 – 3.92 (m, 1.7H), 3.83 – 3.84 (m, 1.3H), 2.77 – 2.79 (m, 0.4H), 2.58 – 2.71 (m, 0.8H), 2.19 – 2.35 (m, 4H), 2.05 – 2.11 (m, 1H), 1.91 – 1.98 (m, 1H), 1.57 – 1.73 (m, 4H), 0.83 – 1.46 (m, 13H); <sup>13</sup>C NMR (101 MHz, CDCl<sub>3</sub>)  $\delta$  197.7, 170.5, 170.1, 166.7, 114.7, 114.5, 96.7, 95.3, 53.7, 51.5, 51.1, 42.8, 42.5, 39.4, 36.8, 32.0, 31.8, 31.75, 31.34, 31.31, 31.1, 30.0, 29.9, 29.6, 29.0, 28.8, 28.0, 27.5, 27.0, 26.8, 26.79, 26.75, 26.6, 26.58; HRMS (ESI-TOF) calcd. for [C<sub>19</sub>H<sub>28</sub>O<sub>5</sub>+H]<sup>+</sup> 337.2010; found: 337.2029.

HPLC IC-3, 9:1, 1 mL/min,  $\lambda = 254$  nm; *tr* = 15.39 (minor), 22.76 (major); 89:11 e.r.

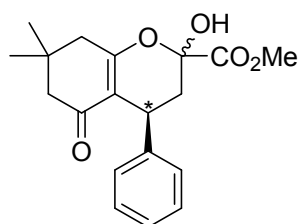

**Methyl (4S)-4-(4-chlorophenyl)-2-hydroxy-7,7-dimethyl-5-oxo-3,4,5,6,7,8-hexahydro-2H-chromene-2-carboxylate, 11c**

The title compound is known and characterized in the literature.<sup>S11</sup>

<sup>S11</sup> Song, X.; Liu, J.; Liu, M.-M.; Wang, X.; Zhang, Z.-F.; Wang, M. C. *Tetrahedron* **2014**, *70*, 5468-5474.



HPLC AD-H, 7:3, 0.7 mL/min,  $\lambda = 254$  nm; tr = 8.08 (minor), 14.79 (major); 2:98 e.r.

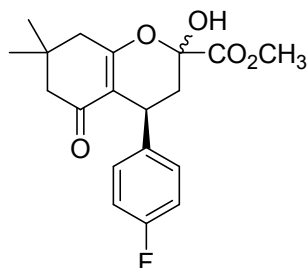

**Methyl (4S)-4-(4-fluorophenyl)-2-hydroxy-7,7-dimethyl-5-oxo-3,4,5,6,7,8-hexahydro-2H-chromene-2-carboxylate 11d**

$[\alpha]_D^{22} = +18.6$  (*c* 0.85,  $\text{CH}_2\text{Cl}_2$ ; 96 %ee);  $^1\text{H}$  NMR (400 MHz,  $\text{CDCl}_3$ , TMS, major/minor anomer, ca. 6:4 ratio)  $\delta$  7.08 – 7.13 (m, 2H), 6.89 – 6.95 (m, 2H), 4.42 (br., 0.6H), 4.23 (br., 0.4H), 4.05 (d,  $J = 7.0$  Hz, 0.4H), 3.88 (bt,  $J = 9.0, 1.9$  Hz, 0.6H), 3.85 (s, 1.1H), 3.78 (s, 1.9H), 2.55 (d,  $J = 7.7$  Hz, 0.2H), 2.53 (d,  $J = 7.3$  Hz, 0.2H), 2.47 (d,  $J = 17.6$  Hz, 0.4H), 2.24 – 2.43 (m, 2.7H), 2.23 (d,  $J = 8.8$  Hz, 1.3H), 2.19 (s, 1.2H), 1.18 (s, 1.1H), 1.15 (s, 1.9H), 1.10 (s, 1H), 1.08 (s, 2H);  $^{13}\text{C}$  NMR (101 MHz,  $\text{CDCl}_3$ , major/minor anomer, ca. 6:4 ratio)  $\delta$  196.0 / 196.5, 169.3 / 169.4, 166.8 / 167.4, 161.30 / 161.33 (d,  $J_{\text{C-F}} = 244$  Hz), 139.7 / 138.8 (d,  $J_{\text{C-F}} = 3$  Hz), 128.4 / 128.9 (d,  $J_{\text{C-F}} = 8$  Hz), 115.1 / 114.9 (d,  $J_{\text{C-F}} = 21.5$  Hz), 114.0 / 112.2, 94.9 / 95.7, 53.48 / 53.56, 50.94 / 50.92, 42.53 / 42.47, 38.3 / 35.9, 32.7 / 32.0, 31.7 / 31.4, 29.1 / 28.8, 27.7 / 28.2;  $^{19}\text{F}$  NMR ( $\text{CDCl}_3$ , 376 MHz)  $\delta$  -117.13 (tt,  $J = 8.6, 5.2$  Hz, 0.62 F), -117.17 (tt,  $J = 8.6, 5.2$  Hz, 0.38 F). HRMS (ESI-TOF) calcd. for  $[\text{C}_{19}\text{H}_{21}\text{FO}_5 + \text{H}]^+$  349.1446 found 349.1458.

HPLC AD-H, 7:3, 0.7 mL/min,  $\lambda = 254$  nm; tr = 7.29 (minor), 12.79 (major); 2:98 e.r.

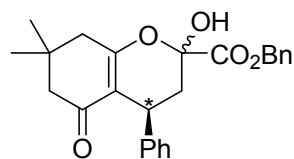

**Benzyl (4S)-2-hydroxy-7,7-dimethyl-5-oxo-4-phenyl-3,4,5,6,7,8-hexahydro-2H-chromene-2-carboxylate, 11e**

Applying the general procedure, product (93.5 % yield) was obtained as an off-white foam.

$[\alpha]_D^{23} = +14.5$  (*c* 0.80,  $\text{CH}_2\text{Cl}_2$ ; 96.4 %ee);  $^1\text{H}$  NMR (400 MHz,  $\text{CDCl}_3$ , TMS)  $\delta$  7.26 – 7.39 (m, 5H), 7.22 – 7.24 (m, 2H), 7.13 – 7.17 (m, 3H), 5.25 (s, 0.8H), 5.18 (d,  $J = 12.2$ , 0.6H), 5.05 (d,  $J = 12.2$  Hz, 0.6H), 4.67 (br., 0.6H), 4.36 (br., 0.3H), 4.03 (m, 0.4H), 3.89 (dd,  $J = 9.5, 8.3$  Hz, 0.6H), 2.57 (dd,  $J = 14.2, 7.4$  Hz, 0.4H), 2.39 – 2.47 (m, 1H), 2.24 – 2.35 (m, 3H), 2.15–2.22 (m, 1.6H), 1.17 (s, 1.2H), 1.15 (s, 1.8H), 1.07 (s, 1.8H), 1.06 (s, 1.2H);  $^{13}\text{C}$  NMR (101 MHz,  $\text{CDCl}_3$ )  $\delta$  196.7, 196.3, 168.8, 168.6, 167.6, 167.0, 144.0, 143.0, 134.5, 134.4, 128.84, 128.78, 128.76, 128.7, 128.4, 128.38, 128.36, 128.3, 127.3, 127.1, 126.2, 126.1, 114.0, 112.2, 95.9, 95.0, 68.5, 68.4, 50.8, 50.7, 42.4, 42.3, 38.1, 36.1, 33.4, 32.2, 32.0, 31.7, 29.3, 28.6, 28.5, 27.7. HRMS (ESI-TOF) calcd. for  $[\text{C}_{25}\text{H}_{26}\text{O}_5 + \text{H}]^+$  407.1853 found 407.1854.

HPLC AD-H, 7:3, 0.7 mL/min,  $\lambda = 254$  nm;  $t_r = 9.75$  (minor), 15.37 (major); 98.2:1.78 e.r.

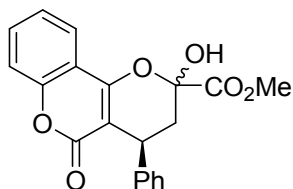

**Methyl (4S)-3,4-dihydro-2-hydroxy-5-oxo-4-phenyl-2H,5H-pyrano[3,2-c][1]benzopyran-2-carboxylic acid, 11f**

The (*R*)-isomer of the title compound is known and characterized in the literature<sup>S12</sup>

Applying a modification of the general procedure ( $-40$  °C, 48 h) the product was obtained in a 99% yield;

HPLC AD-H, 8:2, 0.75 mL/min,  $\lambda = 254$  nm;  $t_r = 12.75$  (minor), 22.03 (major); 97.5:2.5 e.r.

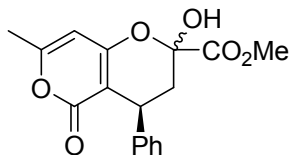

**Methyl (4S)-2-hydroxy-7-methyl-5-oxo-4-phenyl-2,3,4,5-tetrahydropyrano[4,3-b]pyran-2-carboxylate, 11g**

The title compound is known and characterized in the literature<sup>S13</sup> and the (*R*)-isomer of the title compound is also known<sup>S12</sup>

Applying a modification of the general procedure ( $-40$  °C, 48 h) the product was obtained in a >99% yield;

HPLC AD-H, 8:2, 0.75 mL/min,  $\lambda = 254$  nm;  $t_r = 11.97$  (minor), 17.96 (major); 98:2 e.r.

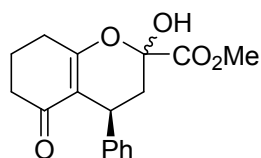

**Methyl (4S)-2-hydroxy-5-oxo-4-phenyl-3,4,5,6,7,8-hexahydro-2H-chromene-2-carboxylate, 11h**

(*R*)-Isomer of the title compound is known and characterized in ref.<sup>S12</sup>

Applying a modification of the general procedure ( $-40$  °C, 48 h) the product was obtained in a >99% yield; HPLC AD-H, 8:2, 0.75 mL/min,  $\lambda = 254$  nm;  $t_r = 10.55$  (minor), 14.43 (major); 99:1 e.r.

**Methyl (4S) 1,4,5,6,7,8-hexahydro-7,7-dimethyl-5-oxo-4-phenylquinoline-2-carboxylate, 12**

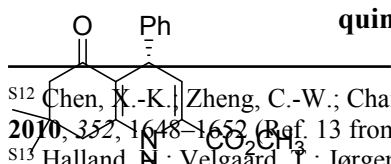

<sup>S12</sup> Chen, X.-K.; Zheng, C.-W.; Chai, S.-L. Zhao, Z.; Zhao, Y.-Q. Yang, G.; Cao, W.-G. *Adv. Synth. Cat.* **2010**, *352*, 1648–1652 (Ref. 13 from the main text)

<sup>S13</sup> Halland, N.; Velgaard, T.; Jørgensen, K. A. *J. Org. Chem.* **2003**, *68*, 5067–5074 (Ref. 10c from the main text)

Ammonium acetate (47 mg, 6 mmol, 10 equiv) was added to the solution of chiral adduct **11a** (199.5 mg, 0.6 mmol, 1.0 equiv; 99.65:0.35 e.r.) in MeOH (4 mL) at rt and the resulted mixture was refluxed for 3h. Then, next portion of ammonium acetate (50 mg) was added at once and the reaction was continued until the total consumption of the substrate (TLC, hexanes/AcOEt, 3:1, v/v). Then the greenish solution was cooled and the solvent was evaporated to give an oily residue. Further purification using silica gel chromatography (hexanes/Et<sub>2</sub>O, 1:1, v/v) gave an off-white solid (110 mg, 59% yield).

$[\alpha]_D^{23} = -473.0$  (*c* 0.40, MeOH; 96.1 %ee); <sup>1</sup>H NMR (400 MHz, CDCl<sub>3</sub>, TMS)  $\delta$  7.24 – 7.29 (m, 4H), 7.14 – 7.18 (m, 1H), 6.46 (br., 1H), 6.12 (dd, *J* = 5.5, 1.8 Hz, 1H), 4.74 (d, *J* = 5.8 Hz, 1H), 3.80 (s, 3H), 2.37 (d, *J* = 16.5 Hz, 1H), 2.31 (dd, *J* = 16.5, 0.6 Hz, 1H), 2.24 (d, *J* = 16.2, Hz, 1H), 2.17 (dd, *J* = 16.5, 0.6 Hz, 1H), 1.09 (s, 3H), 1.03 (s, 3H); <sup>13</sup>C NMR (100 MHz, CDCl<sub>3</sub>)  $\delta$  195.3, 163.4, 150.1, 146.1, 128.5, 127.8, 126.6, 125.7, 117.5, 107.2, 52.6, 50.7, 41.7, 37.8, 32.6, 29.2, 27.5, HRMS calcd. for [C<sub>19</sub>H<sub>21</sub>NO<sub>3</sub>+H]<sup>+</sup> requires 312.1594; found: 312.1606.

HPLC AD-H, 9:1, 0.7 mL/min,  $\lambda$ =254 nm, *tr* = 31.0 (major), 34.47 (minor), 98.05:1.95 e.r.

**Methyl (2*S*,4*S*) 1,2,3,4,5,6,7,8-octahydro-7,7-dimethyl-5-oxo-4-phenyl-quinoline-2-carboxylate, 13**

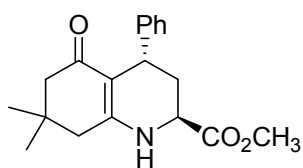

Solution of adduct **11a** (330 mg, 1.0 mmol, 1.0 equiv) in dichloroethane (3 mL) and 4-chlorobenzylamone (420 mg, 3.0 mmol, 3.0 equiv) was stirred at 50°C (oil bath) for 16 h. Then DBU (76 mg, 0.5 mmol, 0.5 equiv) was added at once at 50°C and reaction was performed for the next 20 h. Solvent was removed *in vacuo* and the residue was loaded onto silica gel column (CH<sub>2</sub>Cl<sub>2</sub>/Acetone, 15:1, v/v). Elution in gradient of CH<sub>2</sub>Cl<sub>2</sub>/Acetone, 10:1 to 5:1, v/v, gave 238 mg product (76% of yield) as an off-white solid.

$[\alpha]_D^{23} = +148.7$  (*c* 0.26, MeOH; 97.5 %ee); <sup>1</sup>H NMR (400 MHz, CDCl<sub>3</sub>, TMS)  $\delta$  7.23 – 7.27 (m, 2H), 7.11 – 7.16 (m, 3H), 5.23 (br., 1H), 4.27 (d, *J* = 4.3 Hz, 1H), 3.74 (dd, *J* = 12.5, 3.7 Hz, 1H), 3.70 (d, *J* = 1.2 Hz, 3H), 2.34 (s, 2H), 2.17 – 2.30 (m, 3H), 1.86 (ddd, *J* = 12.5, 4.9, 1.2 Hz, 1H), 1.14 (s, 3H), 1.08 (s, 3H); <sup>13</sup>C NMR (100 MHz, CDCl<sub>3</sub>)  $\delta$  193.2, 172.5, 156.2, 144.8, 128.2, 127.6, 126.1, 105.0, 52.5, 50.2, 49.5, 42.6, 34.1, 32.4, 32.1, 28.5, 28.3; HRMS calcd. for [C<sub>19</sub>H<sub>23</sub>NO<sub>3</sub>+H]<sup>+</sup> 314.1751; found: 314.1747.

HPLC AD-H, 8:2, 1 mL/min,  $\lambda$ =254 nm, *tr* = 8.36 (minor), 14.60 (major), 98.74:1.26 e.r.

# Plots of $^1\text{H}$ , $^{13}\text{C}$ , and $^{19}\text{F}$ NMR spectra

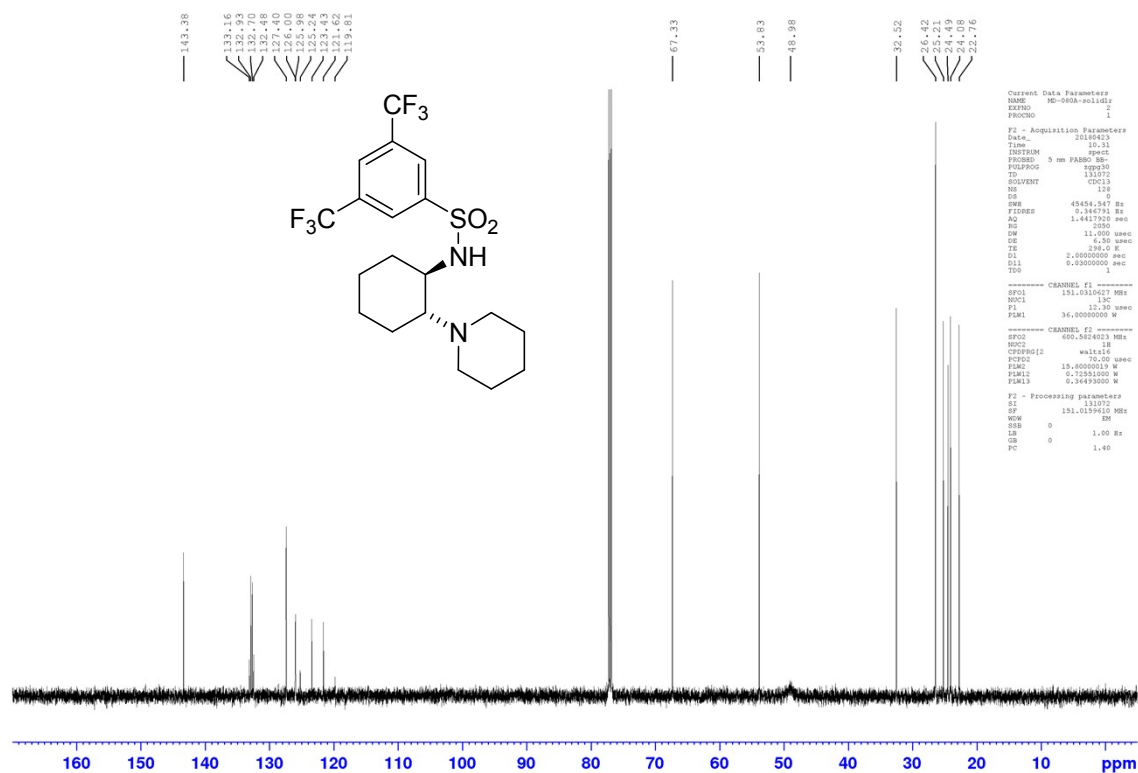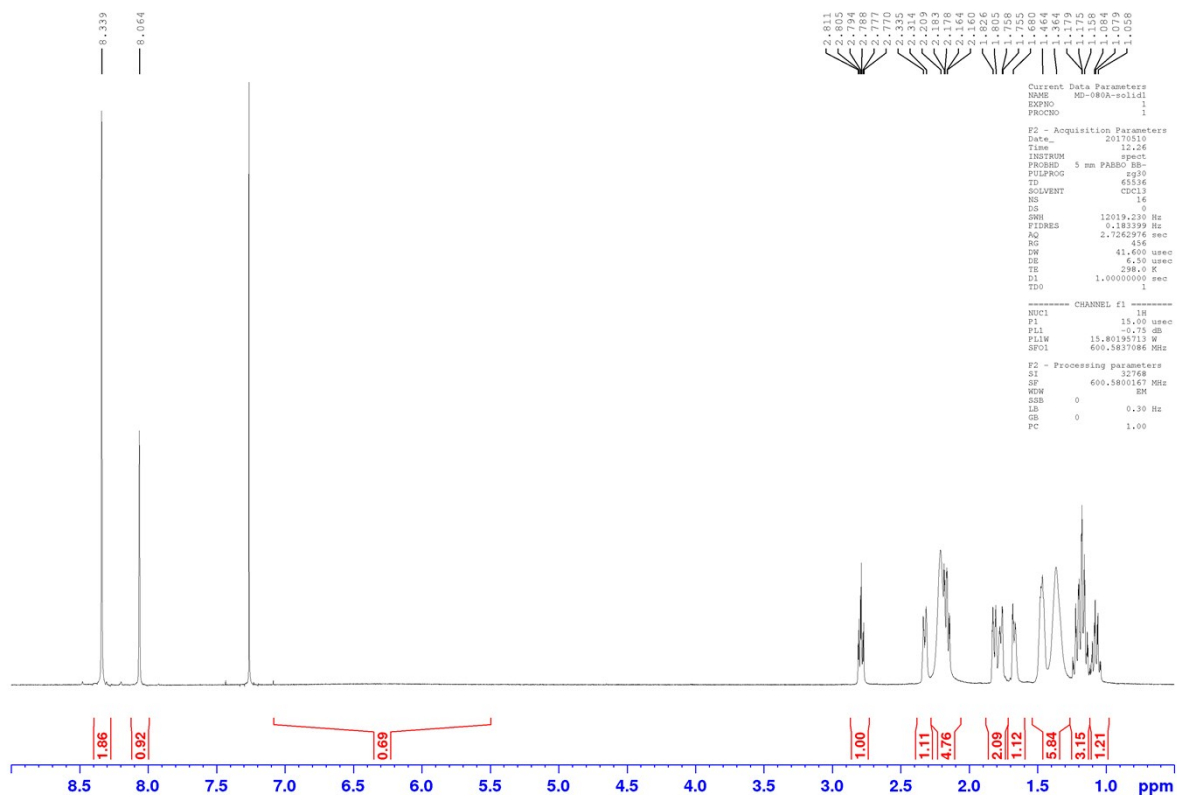

Figure S11.  $^{13}\text{C}$  and  $^1\text{H}$  NMR spectra (151 MHz, 600 MHz,  $\text{CDCl}_3$ ) for catalyst **2a**

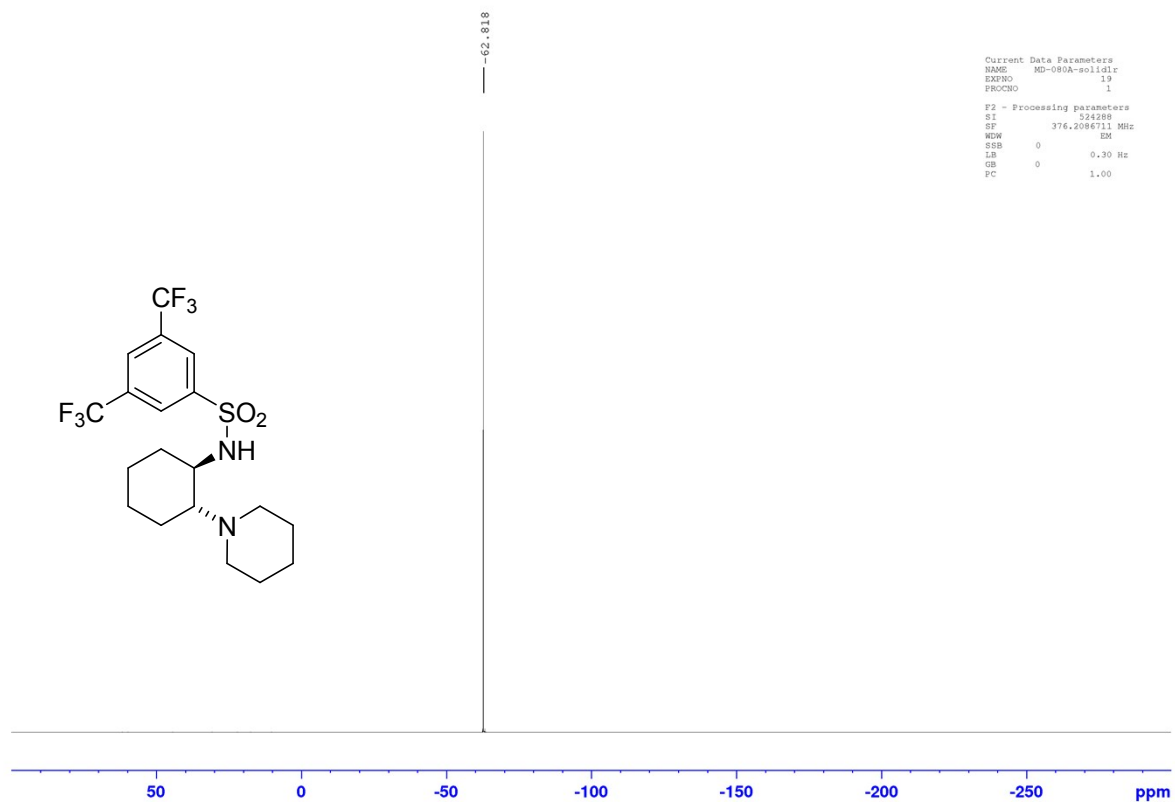

Figure S12.  $^{19}\text{F}$  NMR spectrum (376 MHz,  $\text{CDCl}_3$ ) for catalyst **2a**

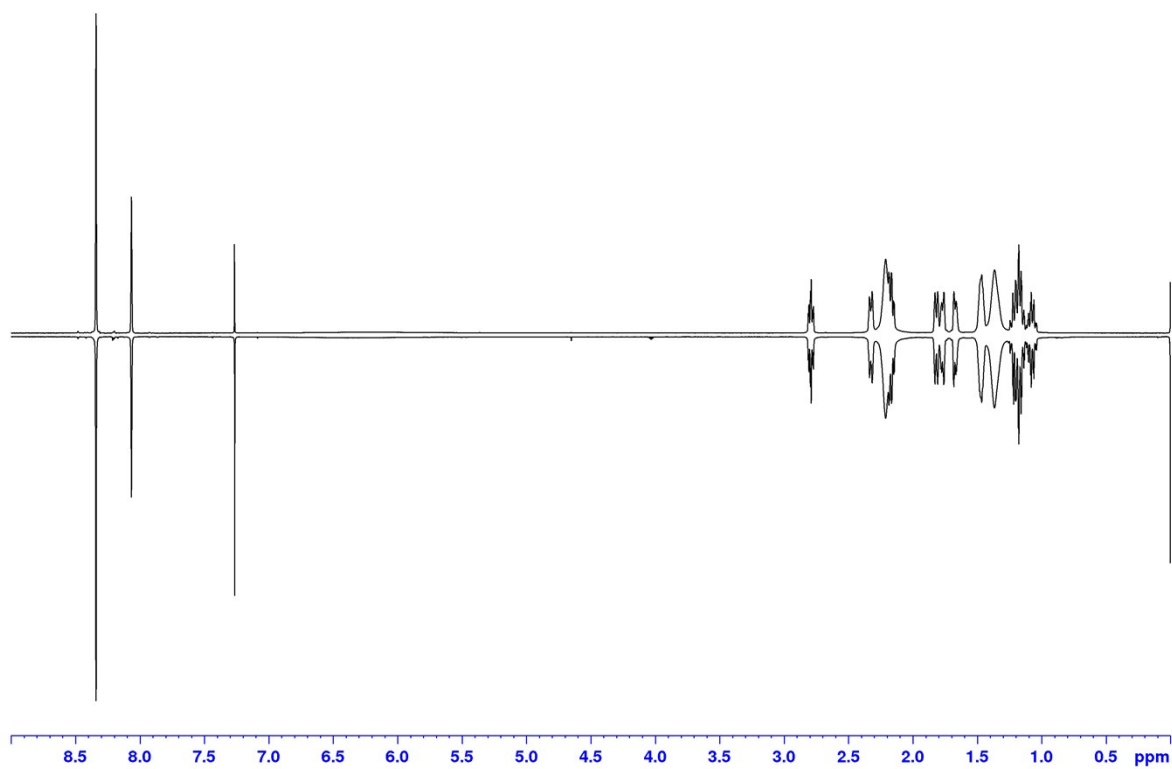

Figure S13. Overlay of  $^1\text{H}$  NMR spectra (600 MHz,  $\text{CDCl}_3$ , TMS) for catalysts **2a** (positive phase) and *ent*-**2a** (negative phase)

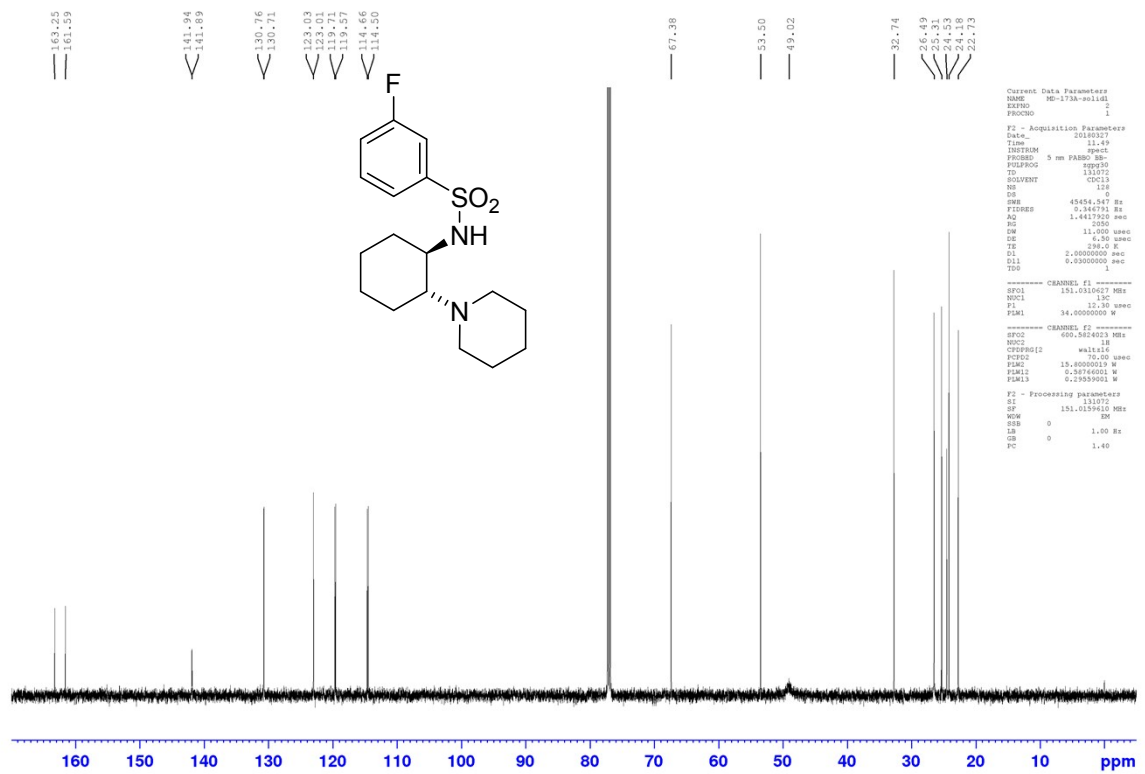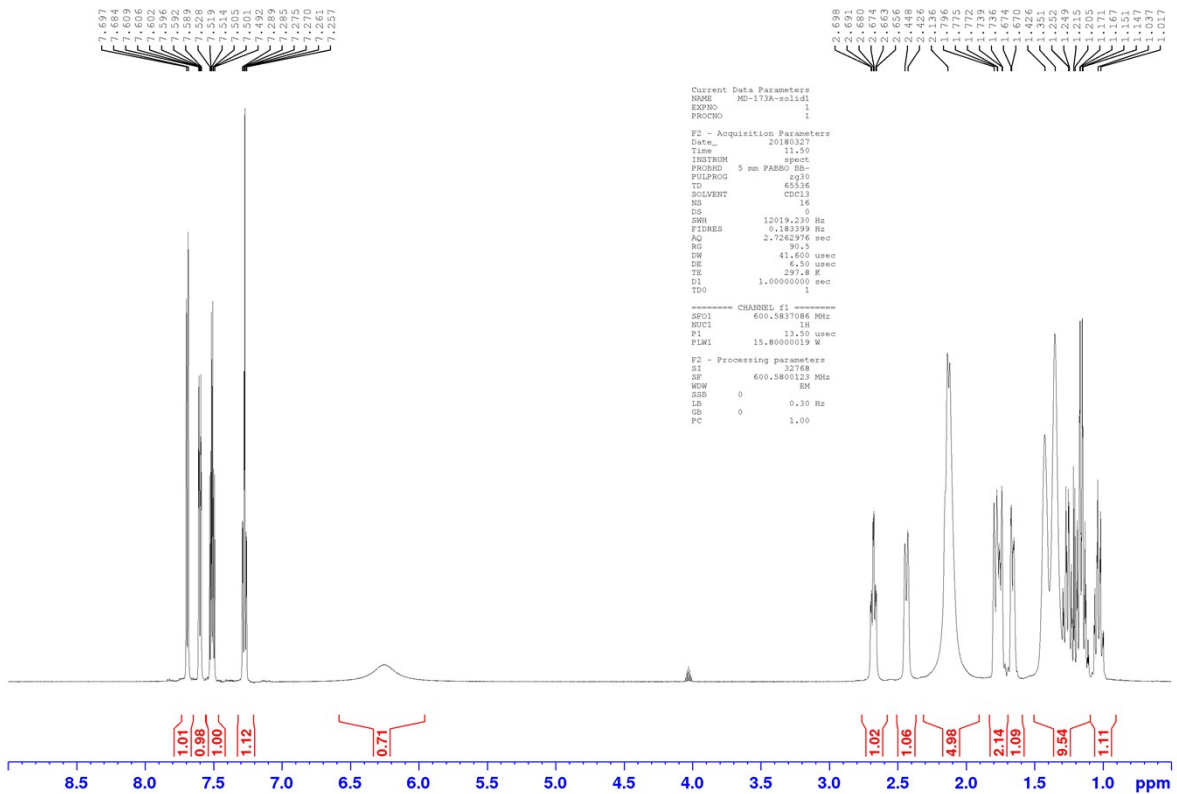

Figure S14.  $^{13}\text{C}$  and  $^1\text{H}$  NMR spectra (151 MHz, 600 MHz,  $\text{CDCl}_3$ ) for catalyst **2b**

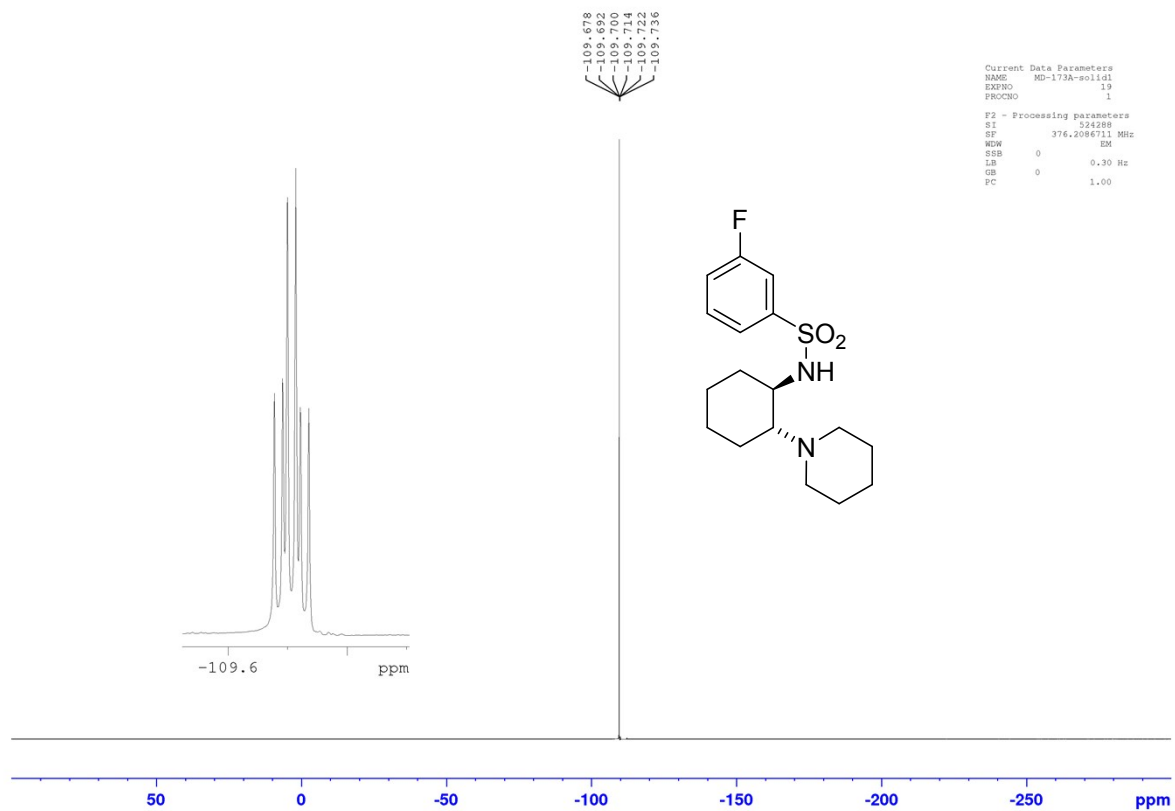

Figure S15.  $^{19}\text{F}$  NMR spectrum (376 MHz,  $\text{CDCl}_3$ ) for catalyst **2b**

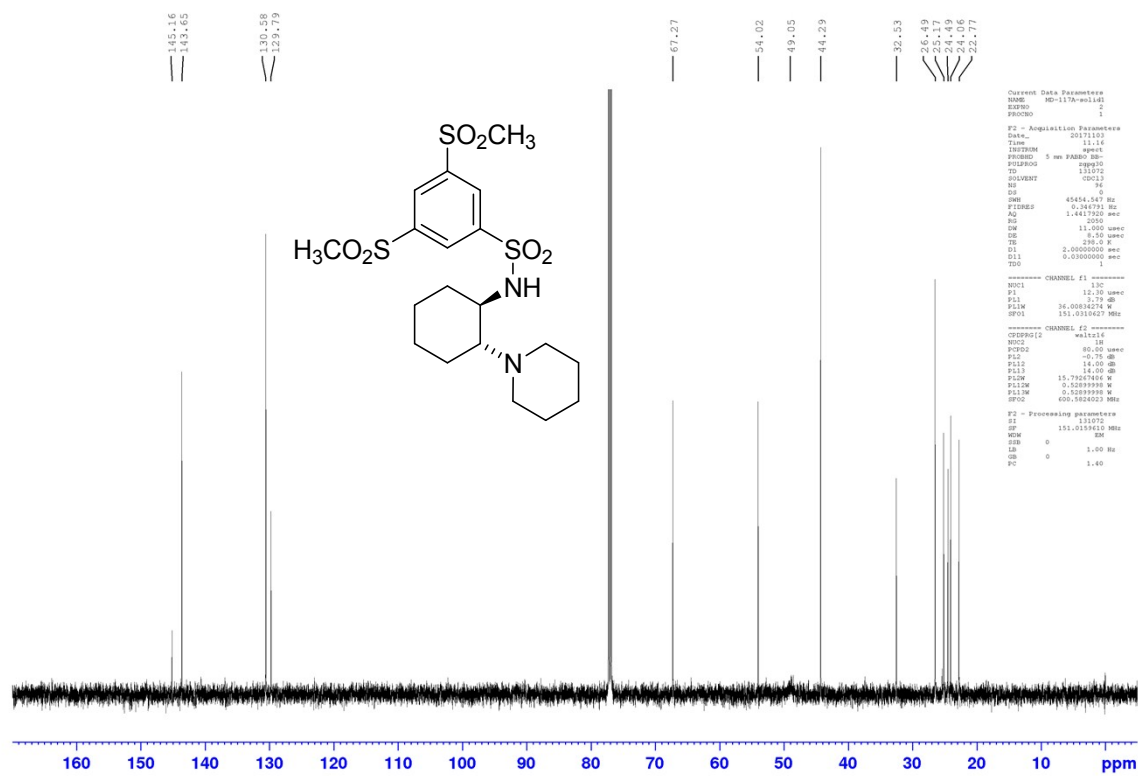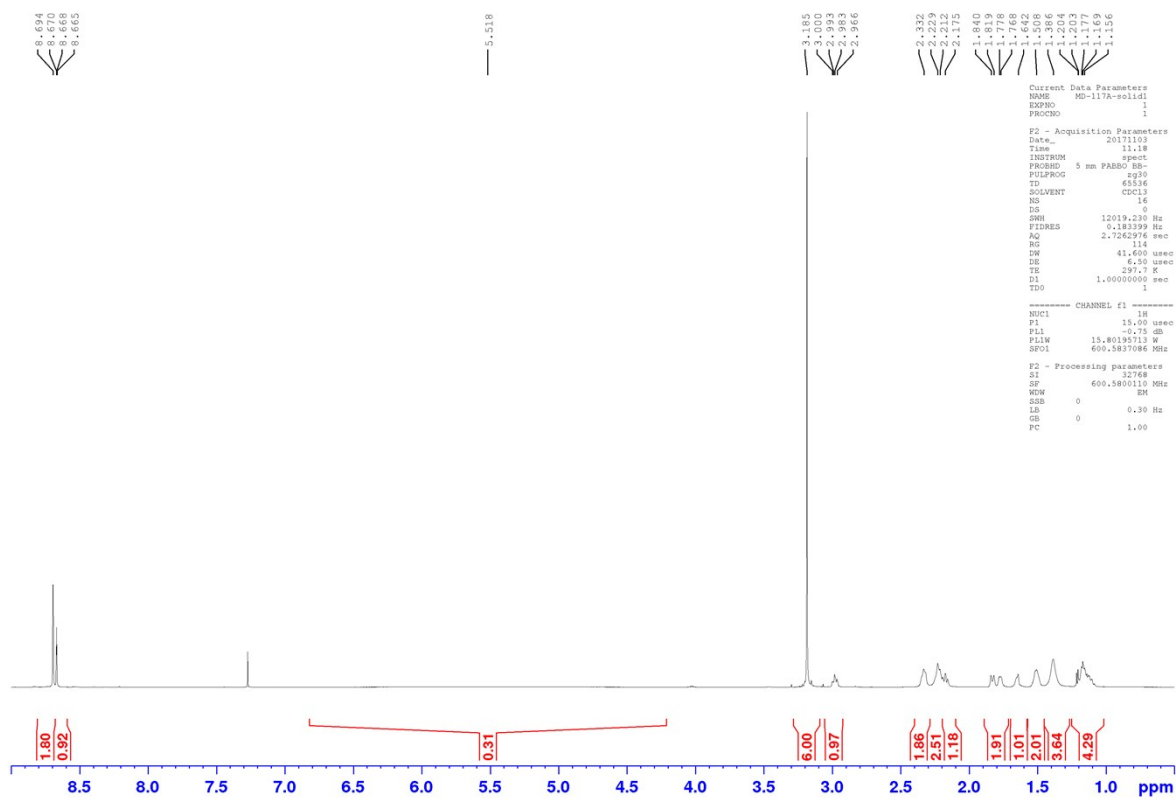

Figure S16. <sup>13</sup>C and <sup>1</sup>H NMR spectra (151 MHz, 600 MHz, CDCl<sub>3</sub>) for catalyst **2c**



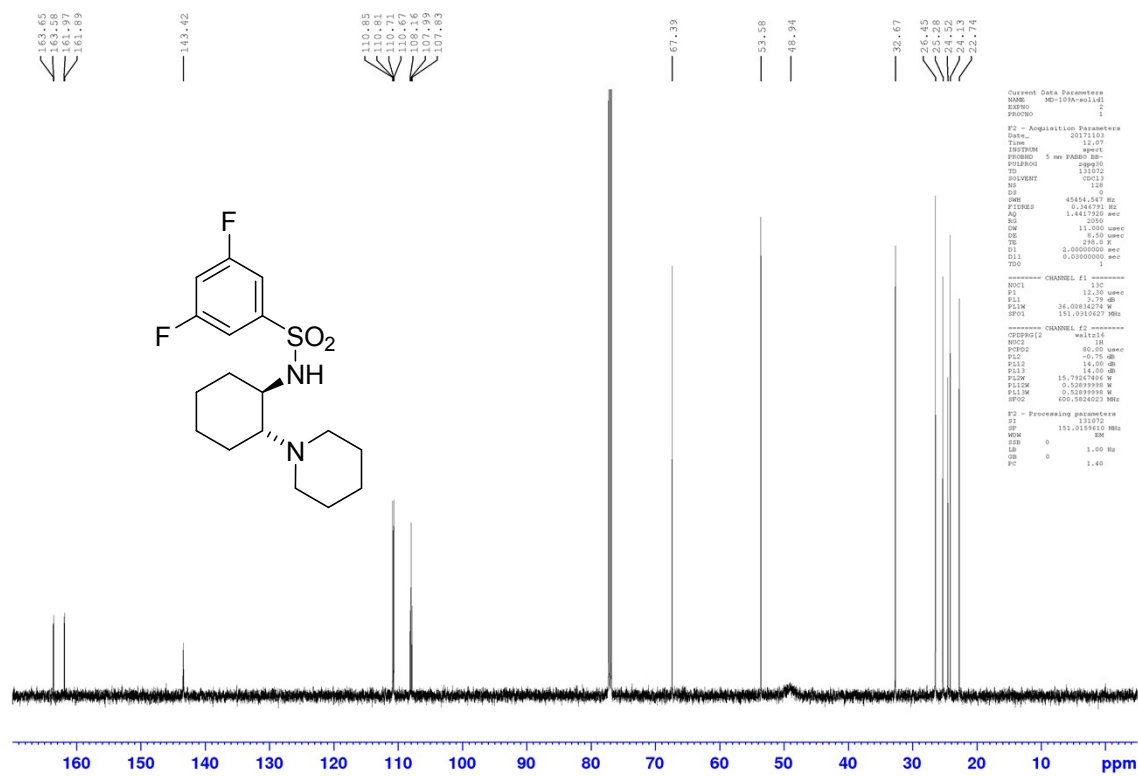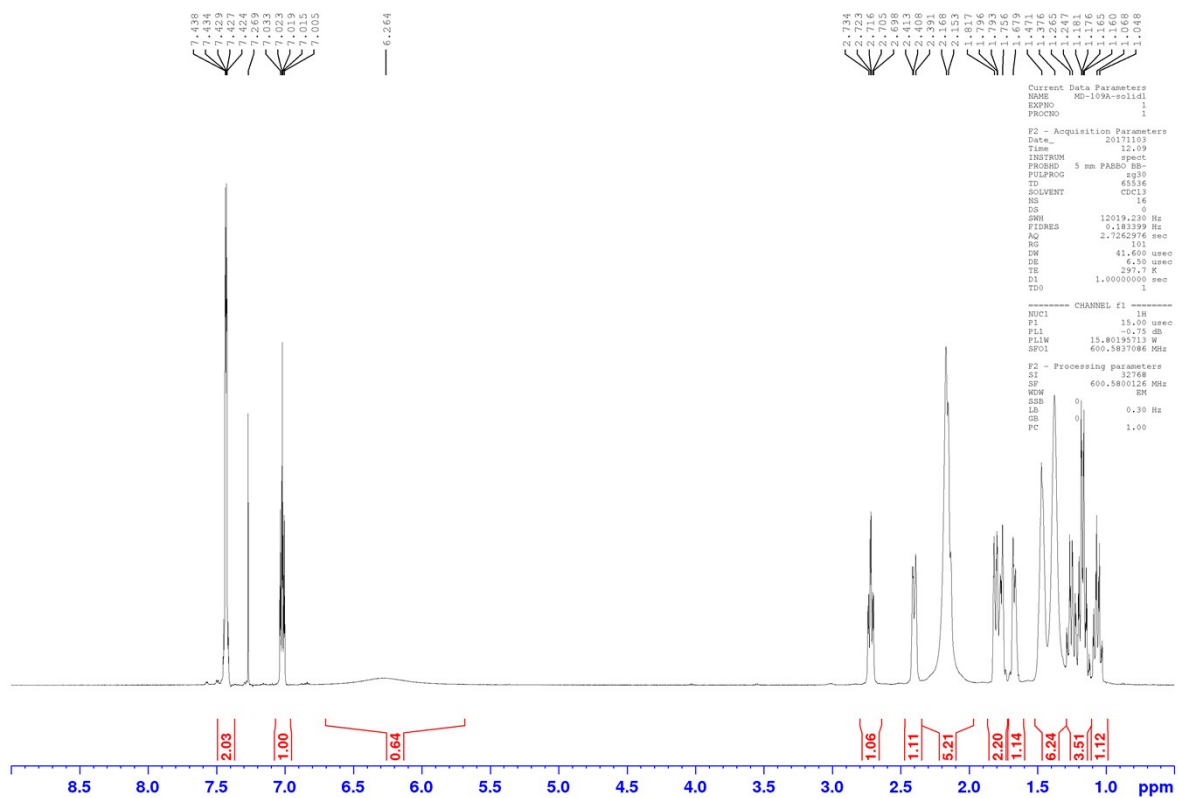

Figure S17. <sup>13</sup>C and <sup>1</sup>H NMR spectra (151 MHz, 600 MHz, CDCl<sub>3</sub>) for catalyst **2d**

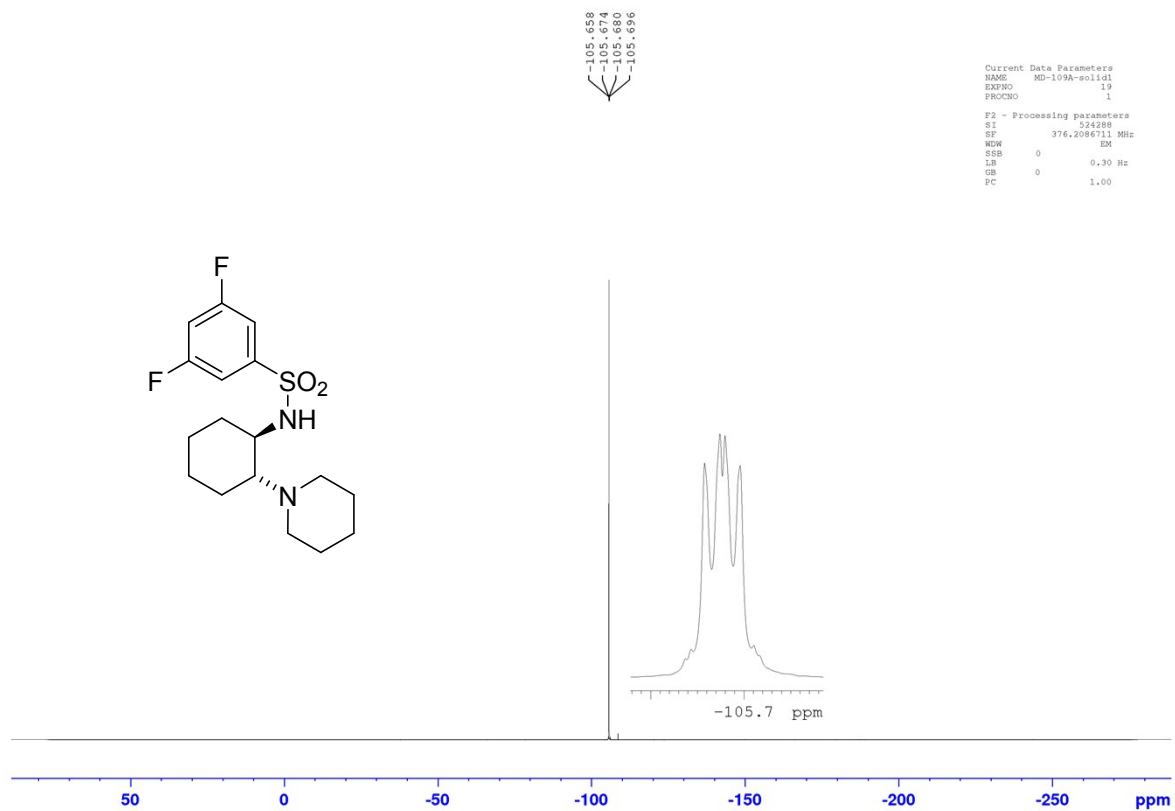

Figure S18.  $^{19}\text{F}$  NMR spectrum (376 MHz,  $\text{CDCl}_3$ ) for catalyst **2d**

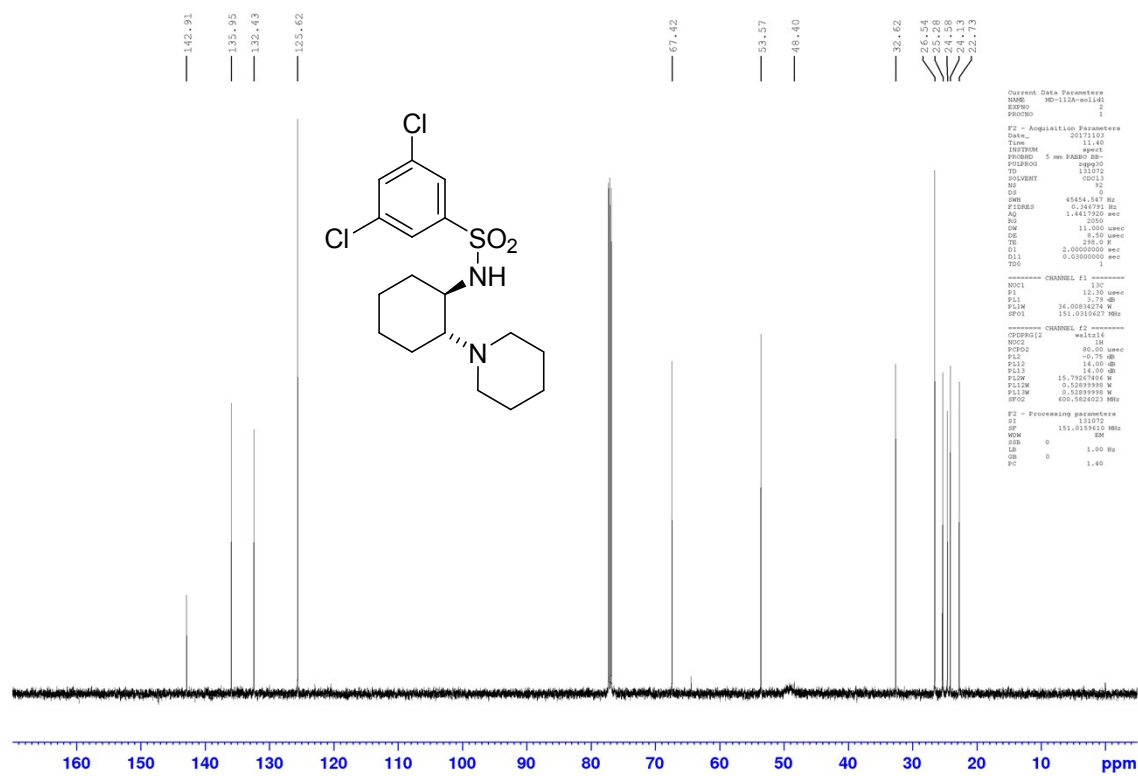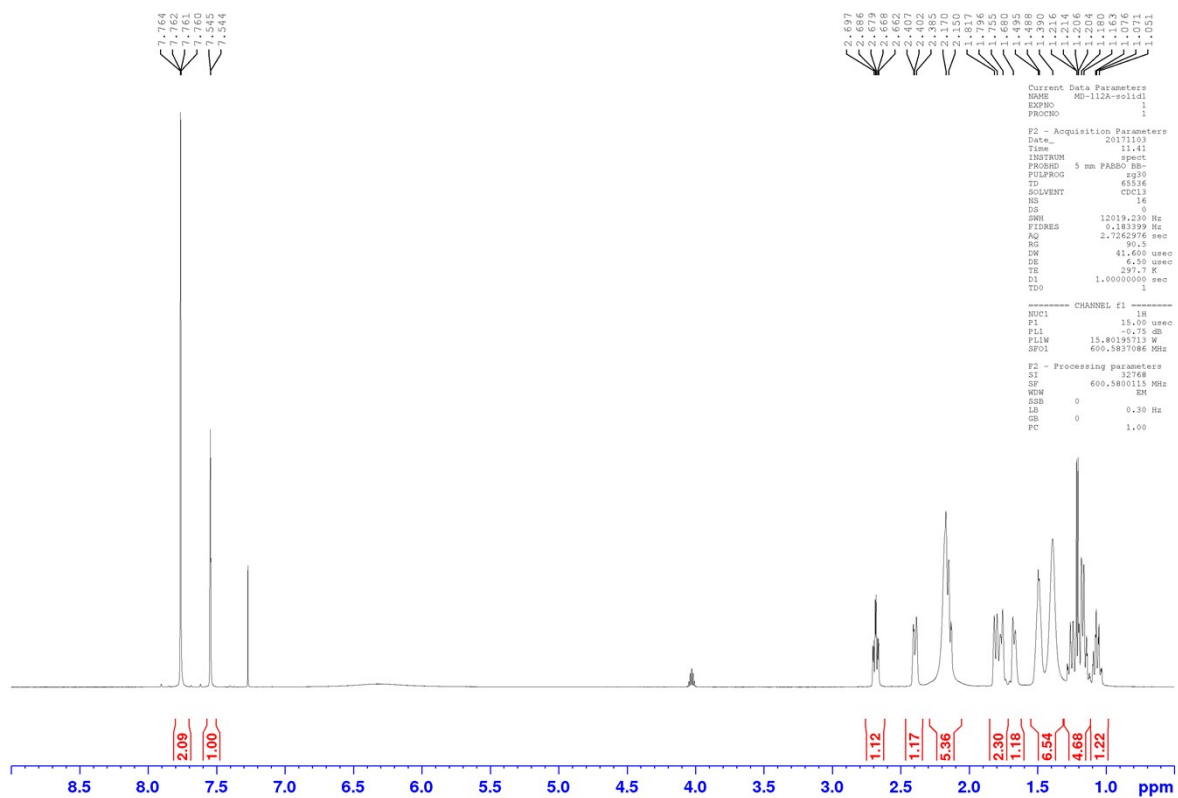

Figure S19. <sup>13</sup>C and <sup>1</sup>H NMR spectra (151 MHz, 600 MHz, CDCl<sub>3</sub>) for catalyst **2e**

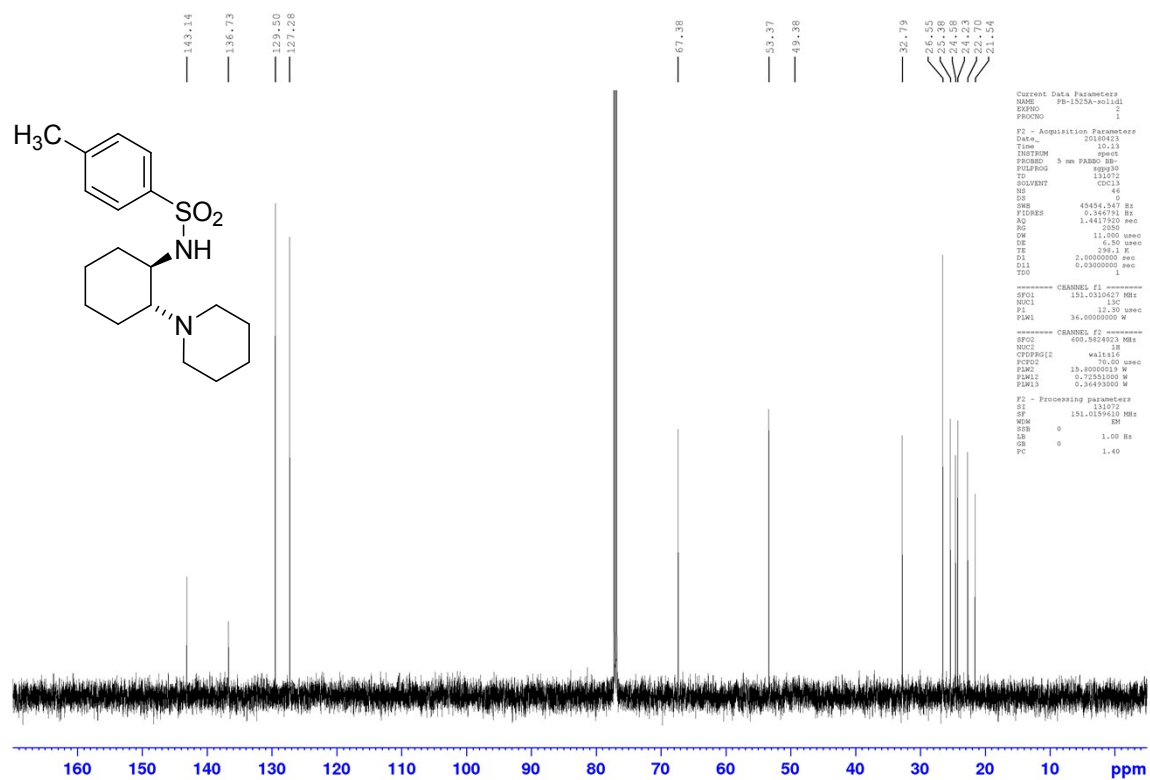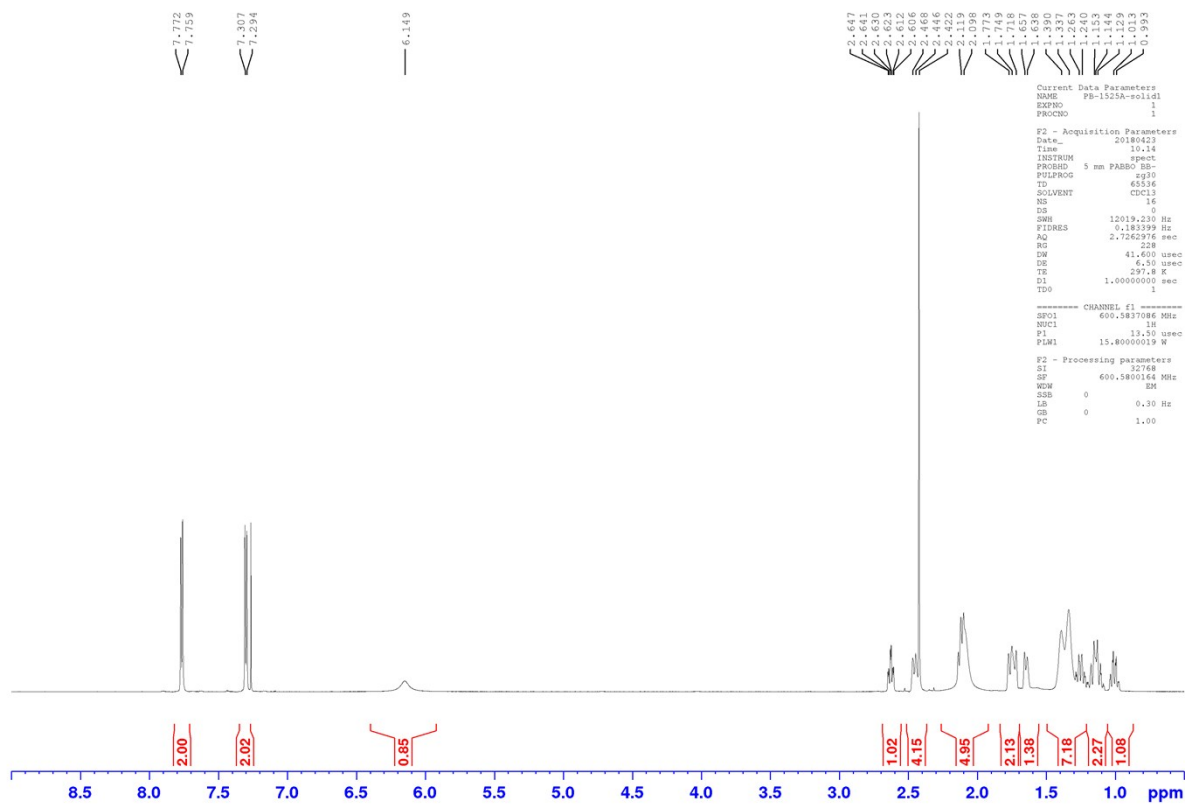

Figure S20. <sup>13</sup>C and <sup>1</sup>H NMR spectra (151 MHz, 600 MHz, CDCl<sub>3</sub>) for catalyst **2f**

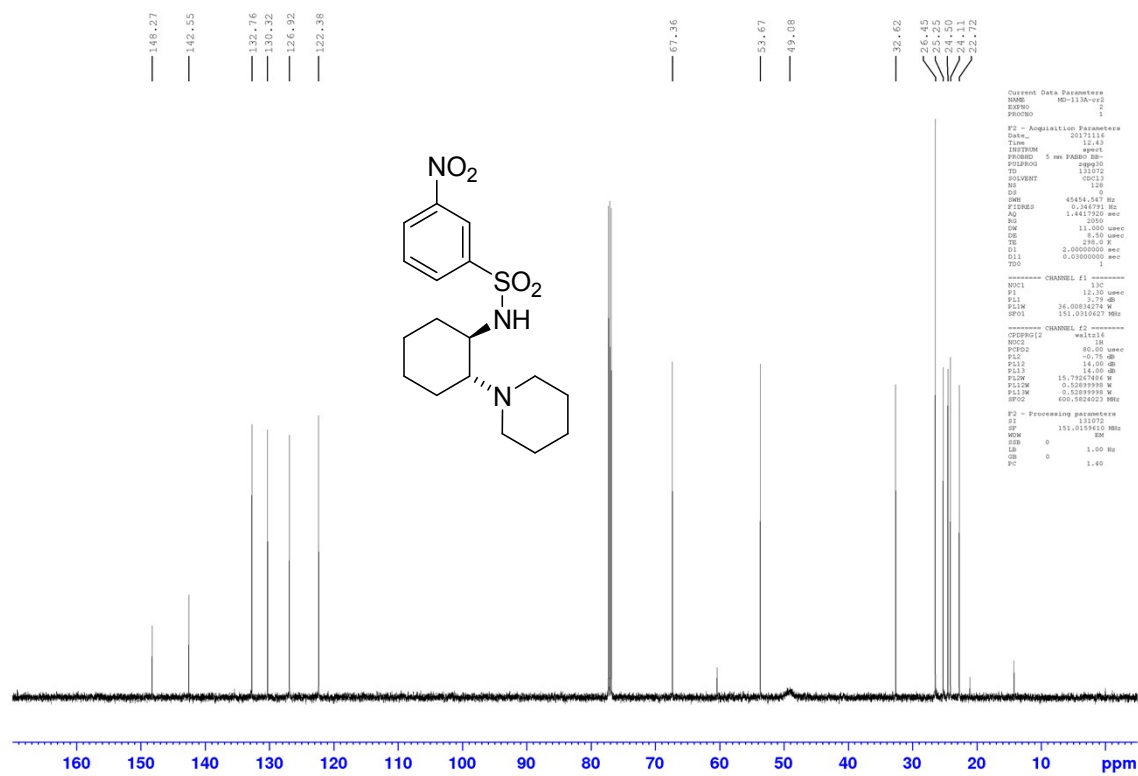

```

Current Data Parameters
NAME MD-113A-cr2
EXPNO 2
PROCNO 1

F2 - Acquisition Parameters
Date_ 2011116
Time 12:43
INSTRUM spect
PROBHD 5 mm PABBO BB-
PULPROG zgpg30
TD 131072
SOLVENT CDCl3
NS 16
DS 0
SWH 4054.141 Hz
FIDRES 0.246791 Hz
AQ 1.441792 sec
RG 2500
RW 11.000 usec
DE 8.50 usec
TE 297.8 K
D1 2.00000000 sec
D11 0.03000000 sec
TDO

----- CHANNEL f1 -----
NUC1 13C
P1 15.00 usec
PL1 -0.75 dB
PL1W 15.80195713 W
SFO1 101.626125 MHz

----- CHANNEL f2 -----
CPDPRG2 waltz16
NUC2 1H
P2 12.00 usec
PL2 -0.75 dB
PL2W 15.80195713 W
SFO2 500.136451 MHz

F2 - Processing parameters
SI 32768
SF 151.0151610 MHz
WDW EM
SSB 0
LB 1.00 Hz
GB 0
PC 1.40
  
```

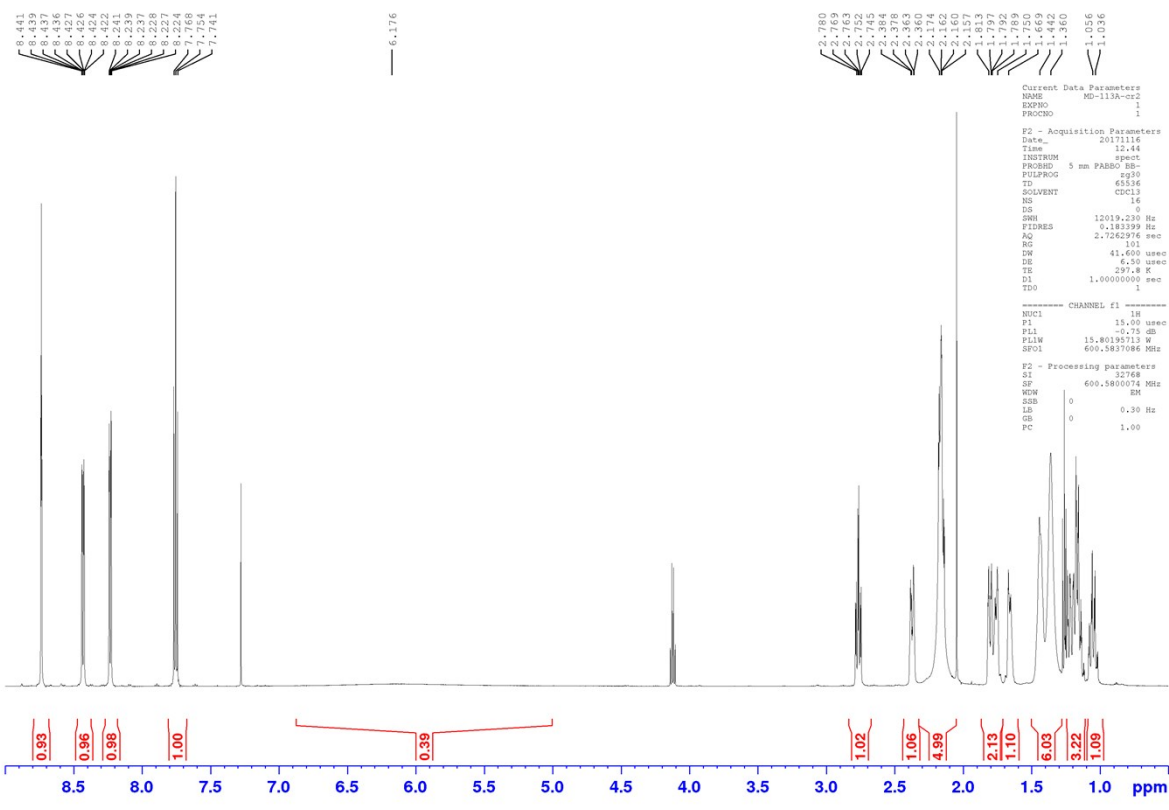

```

Current Data Parameters
NAME MD-113A-cr2
EXPNO 1
PROCNO 1

F2 - Acquisition Parameters
Date_ 2011116
Time 12:44
INSTRUM spect
PROBHD 5 mm PABBO BB-
PULPROG zgpg30
TD 65536
SOLVENT CDCl3
NS 16
DS 0
SWH 12019.230 Hz
FIDRES 0.183399 Hz
AQ 2.7262976 sec
RG 101
RW 41.600 usec
DE 6.50 usec
TE 297.8 K
D1 1.00000000 sec
TDO

----- CHANNEL f1 -----
NUC1 1H
P1 15.00 usec
PL1 -0.75 dB
PL1W 15.80195713 W
SFO1 600.5837086 MHz

F2 - Processing parameters
SI 32768
SF 600.5800074 MHz
WDW EM
SSB 0
LB 0.20 Hz
GB 0
PC 1.00
  
```

Figure S21. <sup>13</sup>C and <sup>1</sup>H NMR spectra (151 MHz, 600 MHz, CDCl<sub>3</sub>) for catalyst **2g**

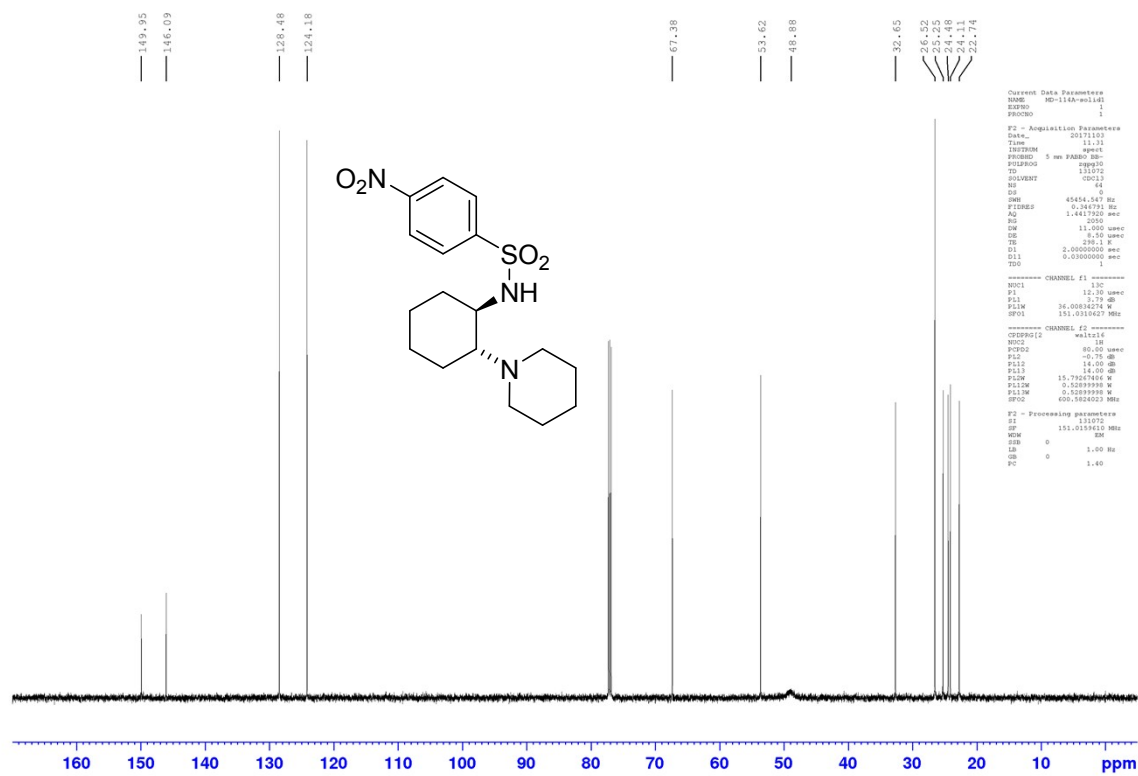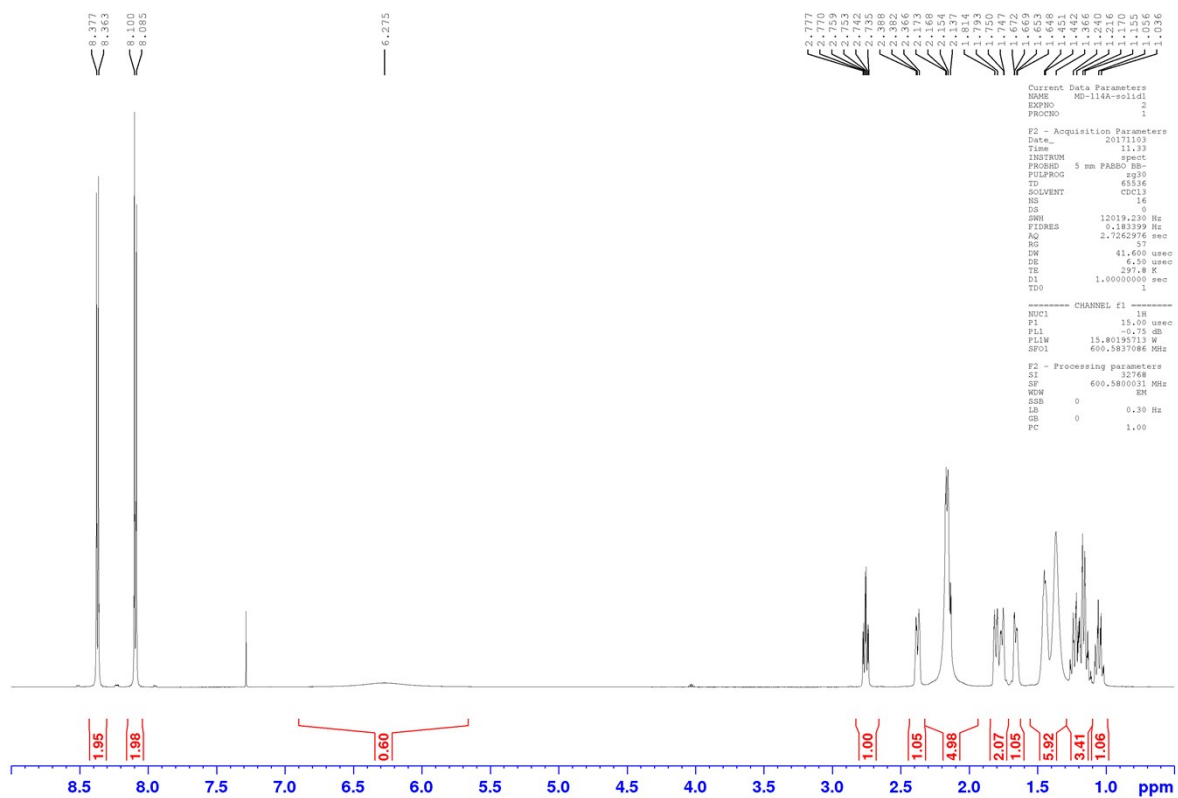

Figure S22.  $^{13}\text{C}$  and  $^1\text{H}$  NMR spectra (151 MHz, 600 MHz,  $\text{CDCl}_3$ ) for catalyst **2h**

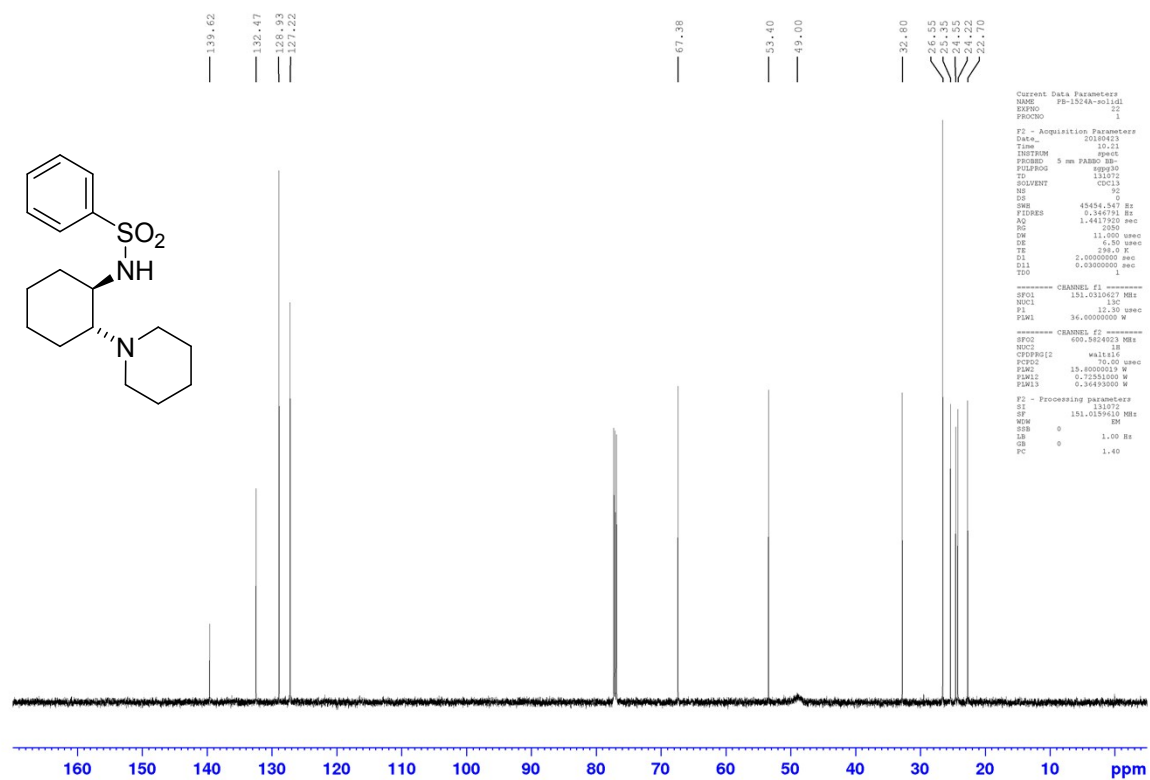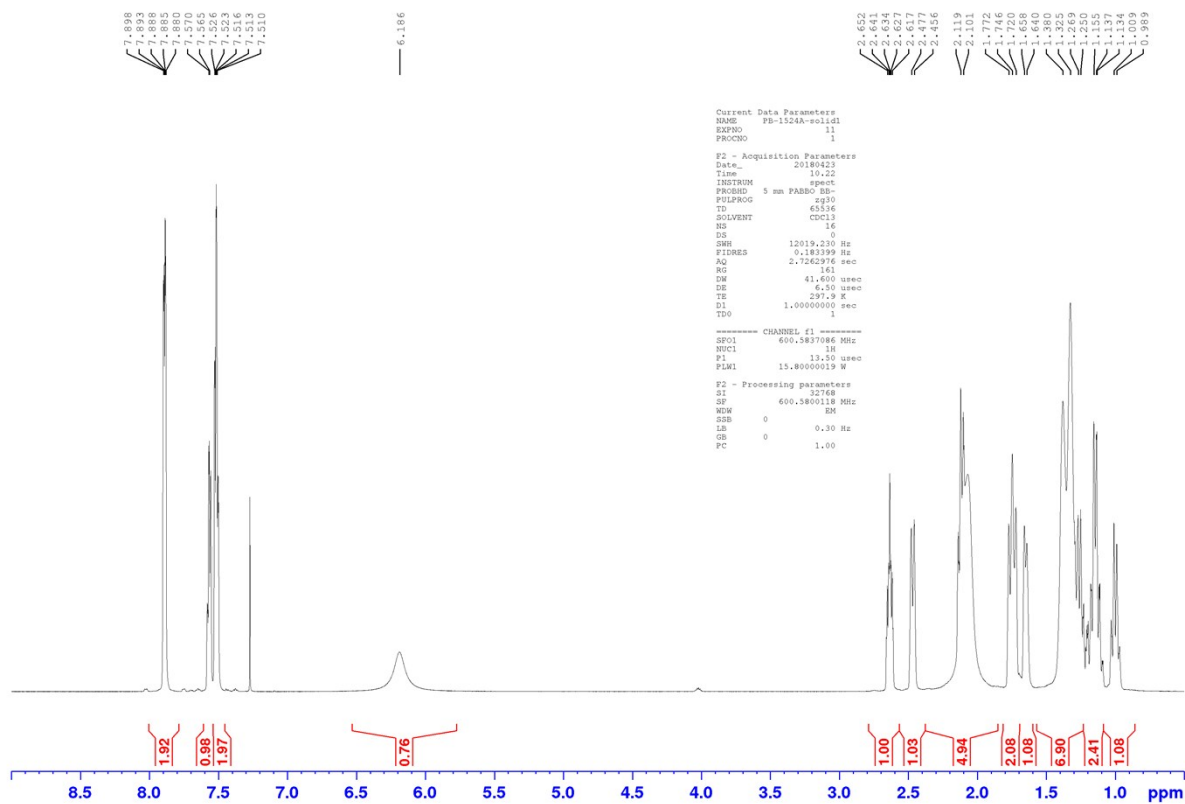

Figure S23. <sup>13</sup>C and <sup>1</sup>H NMR spectra (151 MHz, 600 MHz, CDCl<sub>3</sub>) for catalyst **2i**

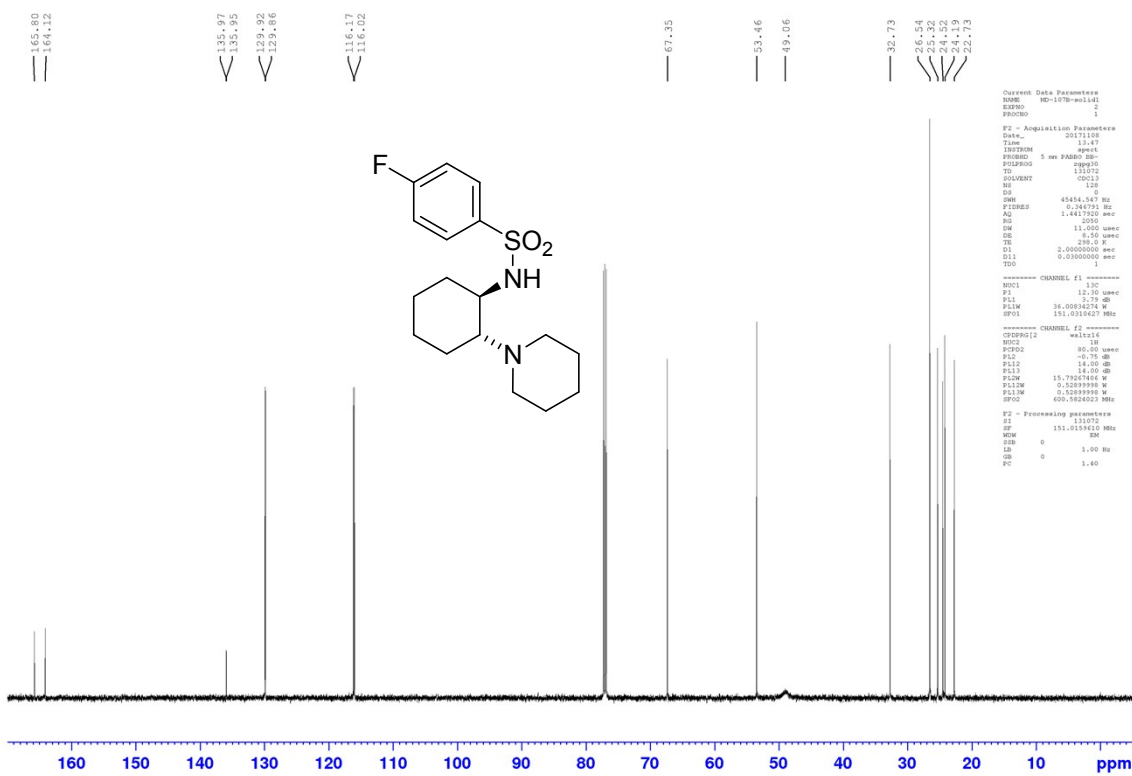

```

Current Data Parameters
NAME MD-107B-solid1
EXPNO 2
PROCNO 1

F2 - Acquisition Parameters
Date_ 2011108
Time 13.47
INSTRUM spect
PROBHD 5 mm PABBO SB-
PULPROG zgpg30
TD 131072
SOLVENT CDCl3
NS 32
DS 0
SWH 4054.141 Hz
FIDRES 0.246791 Hz
AQ 1.441792 sec
RG 2500
DW 1144.900 usec
DE 6.50 usec
TE 298.0 K
D1 2.0000000 sec
D11 0.0300000 sec
D12
D13
D14
D15
D16
D17
D18
D19
D20

===== CHANNEL f1 =====
NUC1 13C
P1 15.00 usec
PL1 0.00 dB
PL1W 15.01942713 W
SFO1 101.6253610 MHz

===== CHANNEL f2 =====
CPDPRG12 waltz16
NUC2 1H
P2 12.00 usec
PL2 0.00 dB
PL2W 14.00 dB
PL1W 15.7927862 W
PL1W 2.5289999 W
PL1W 3.5289999 W
PL1W 4.5289999 W
SFO2 600.5837086 MHz

F2 - Processing parameters
SI 32768
SF 600.5837086 MHz
WDW EM
SSB 0
LB 0.20 Hz
GB 0
PC 1.00
  
```

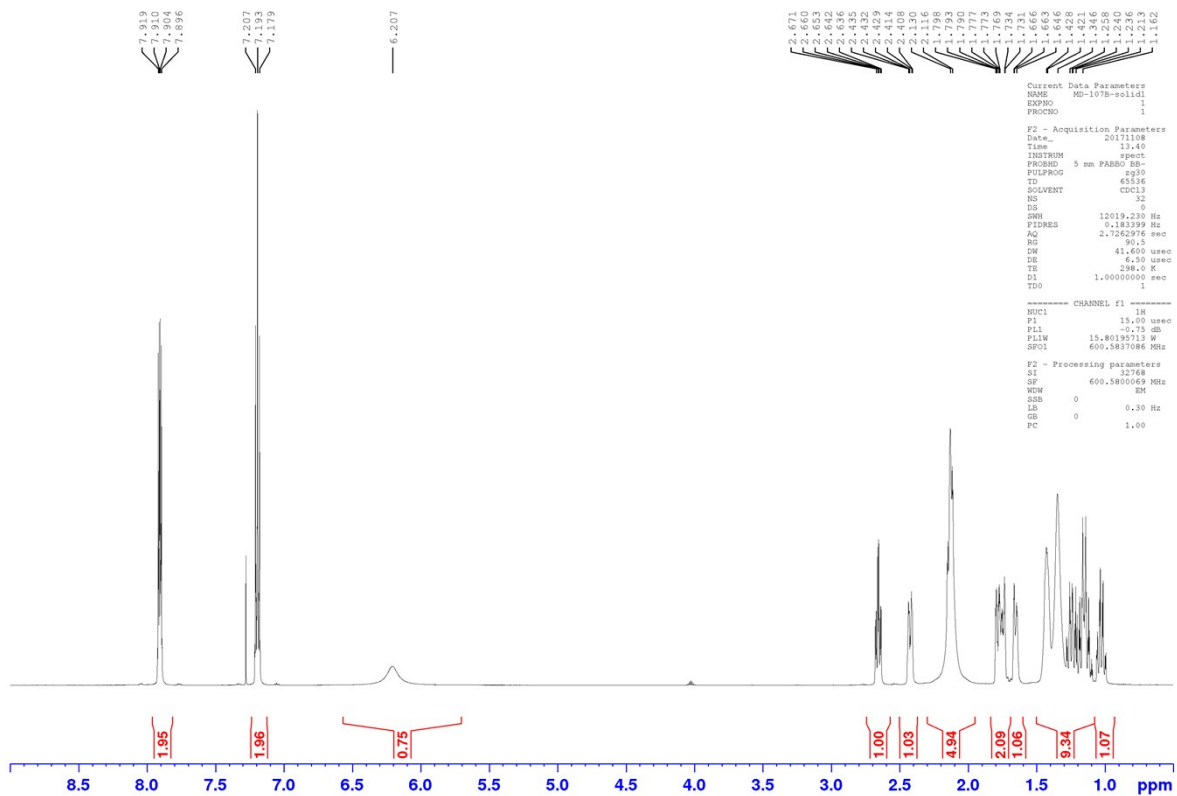

```

Current Data Parameters
NAME MD-107B-solid1
EXPNO 1
PROCNO 1

F2 - Acquisition Parameters
Date_ 2011108
Time 13.40
INSTRUM spect
PROBHD 5 mm PABBO SB-
PULPROG zg30
TD 65536
SOLVENT CDCl3
NS 32
DS 0
SWH 12019.230 Hz
FIDRES 0.283399 Hz
AQ 2.7242976 sec
RG 90.5
DW 41.600 usec
DE 6.50 usec
TE 298.0 K
D1 1.0000000 sec
D11
D12
D13
D14
D15
D16
D17
D18
D19
D20

===== CHANNEL f1 =====
NUC1 1H
P1 15.00 usec
PL1 0.00 dB
PL1W 15.80195713 W
SFO1 600.5837086 MHz

F2 - Processing parameters
SI 32768
SF 600.5837086 MHz
WDW EM
SSB 0
LB 0.20 Hz
GB 0
PC 1.00
  
```

Figure S24.  $^{13}\text{C}$  and  $^1\text{H}$  NMR spectra (151 MHz, 600 MHz,  $\text{CDCl}_3$ ) for catalyst **2j**



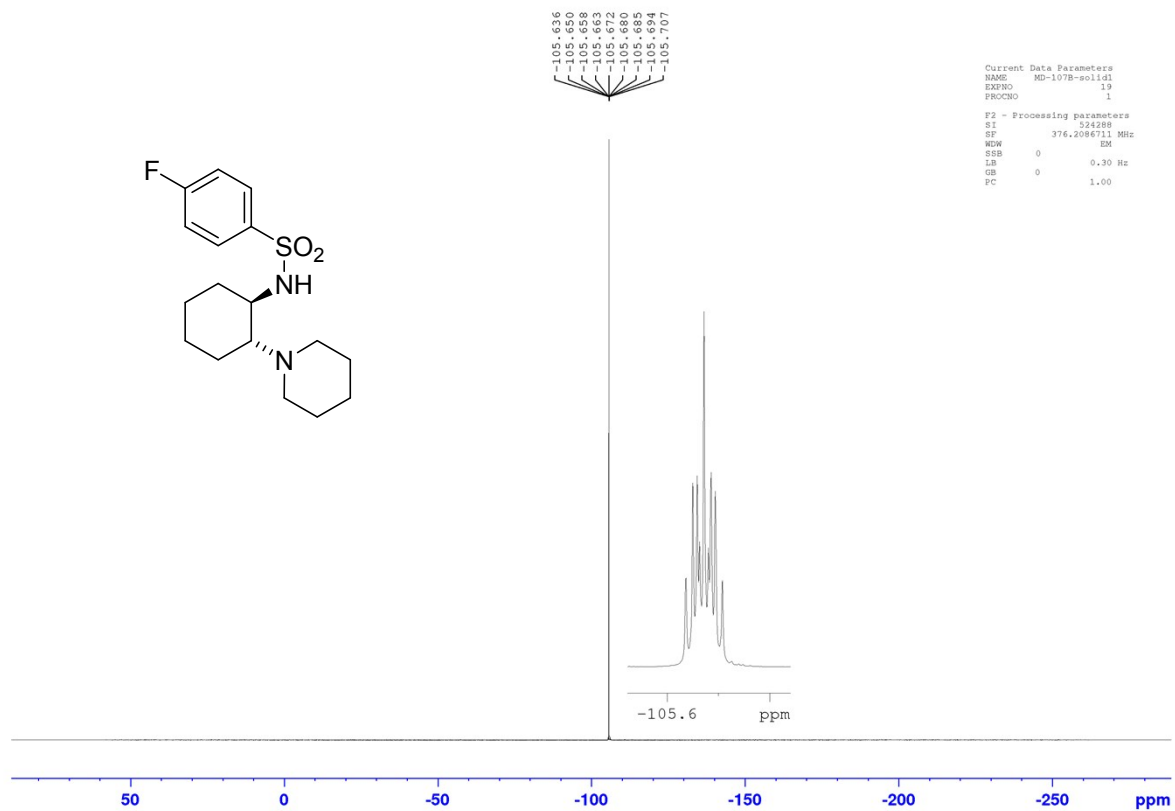

Figure S25.  $^{19}\text{F}$  NMR spectrum (376 MHz,  $\text{CDCl}_3$ ) for catalyst **2j**

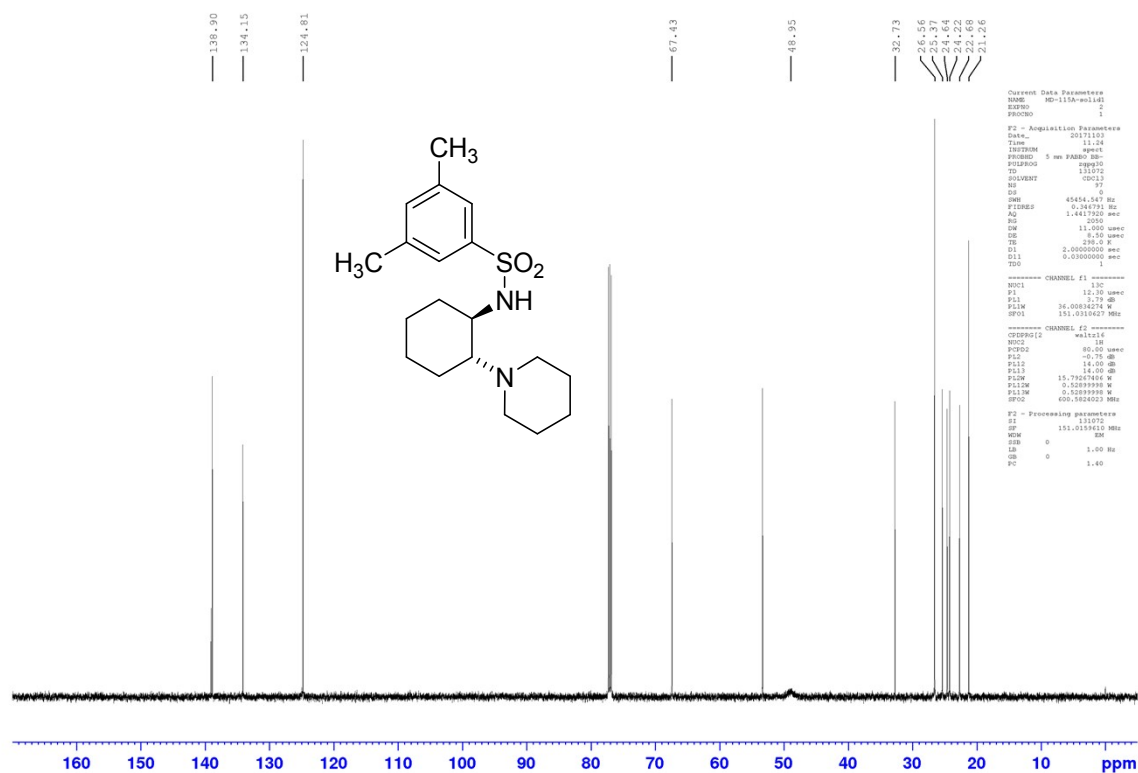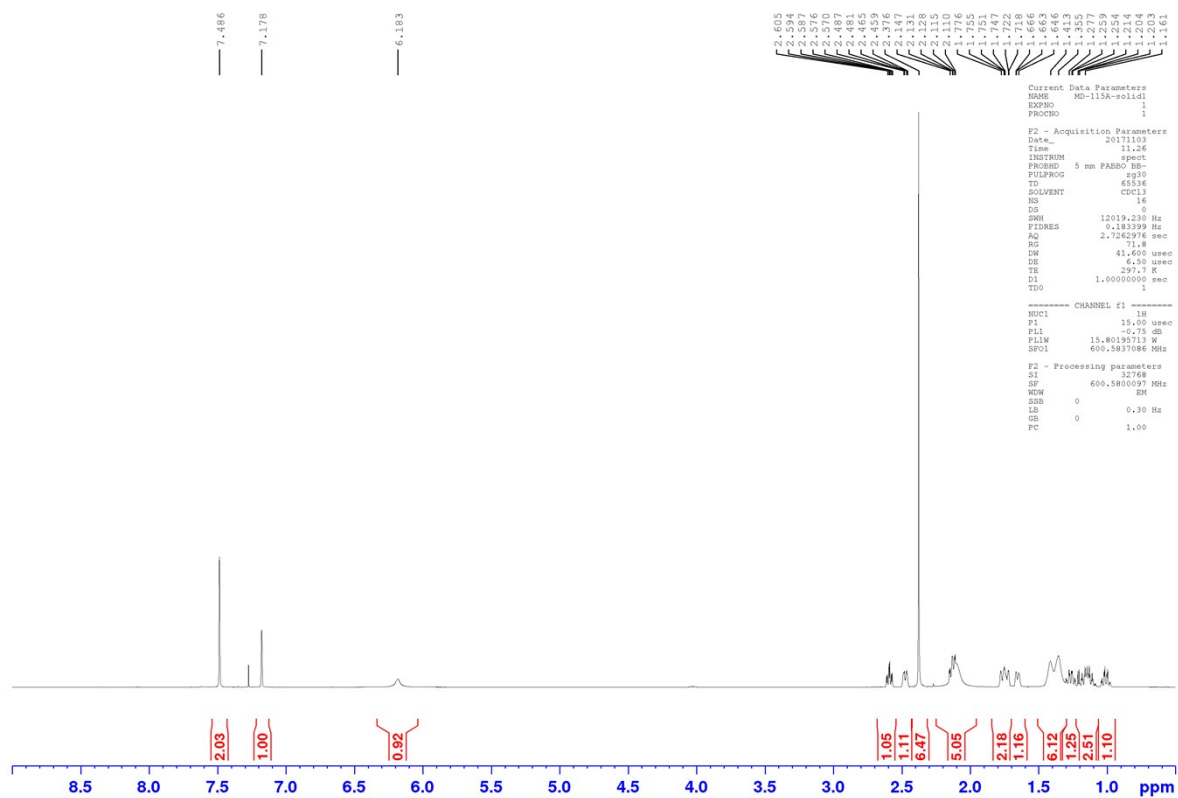

Figure S26. <sup>13</sup>C and <sup>1</sup>H NMR spectra (151 MHz, 600 MHz, CDCl<sub>3</sub>) for catalyst **2k**

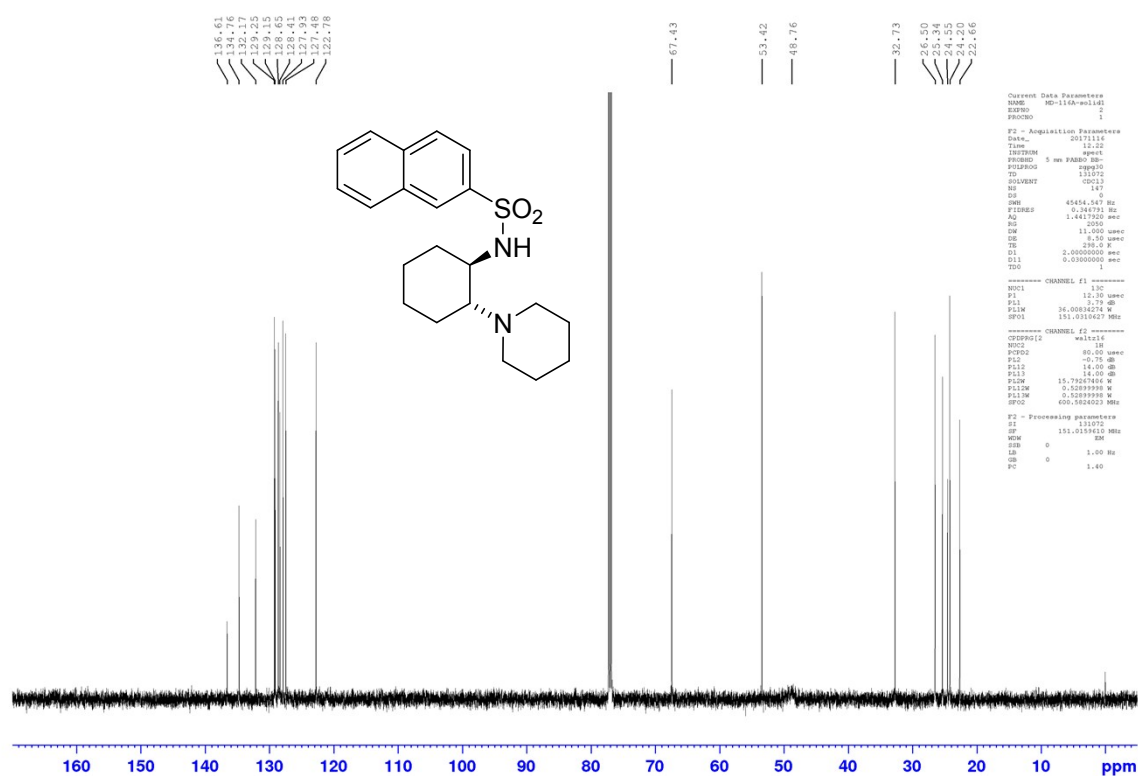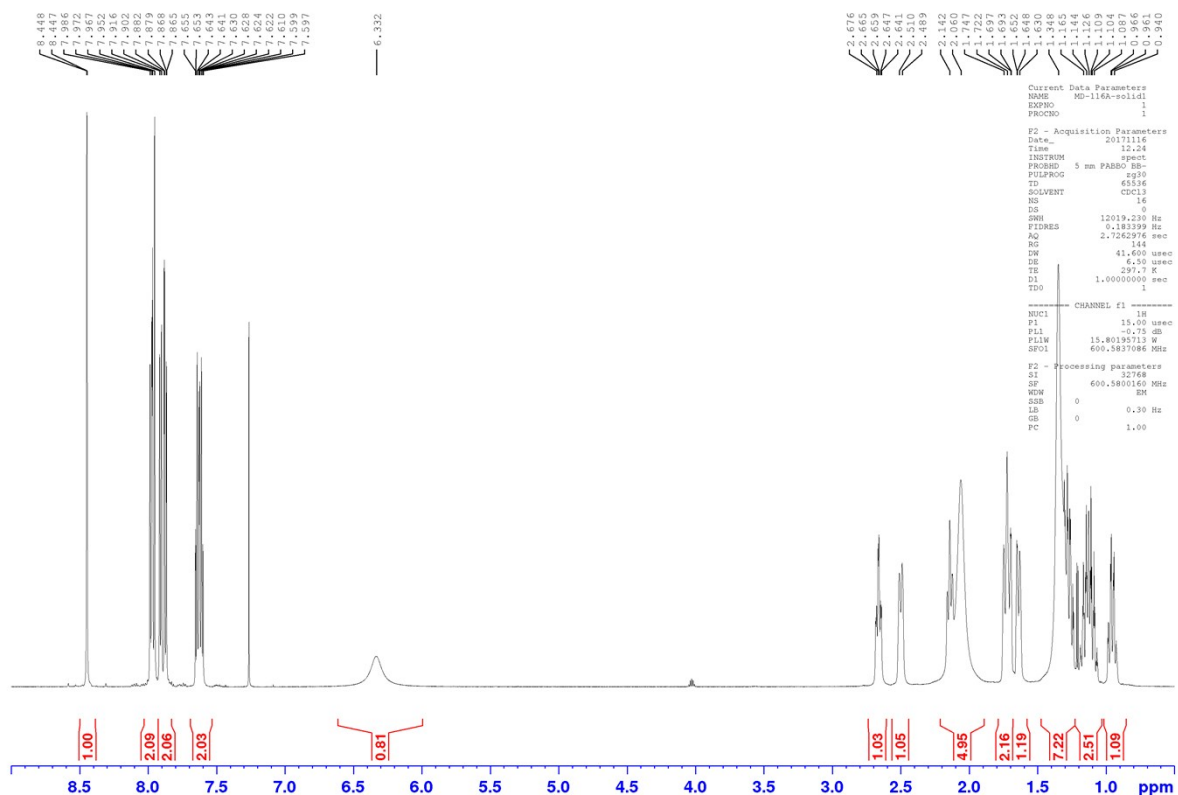

Figure S27. <sup>13</sup>C and <sup>1</sup>H NMR spectra (151 MHz, 600 MHz, CDCl<sub>3</sub>) for catalyst **21**

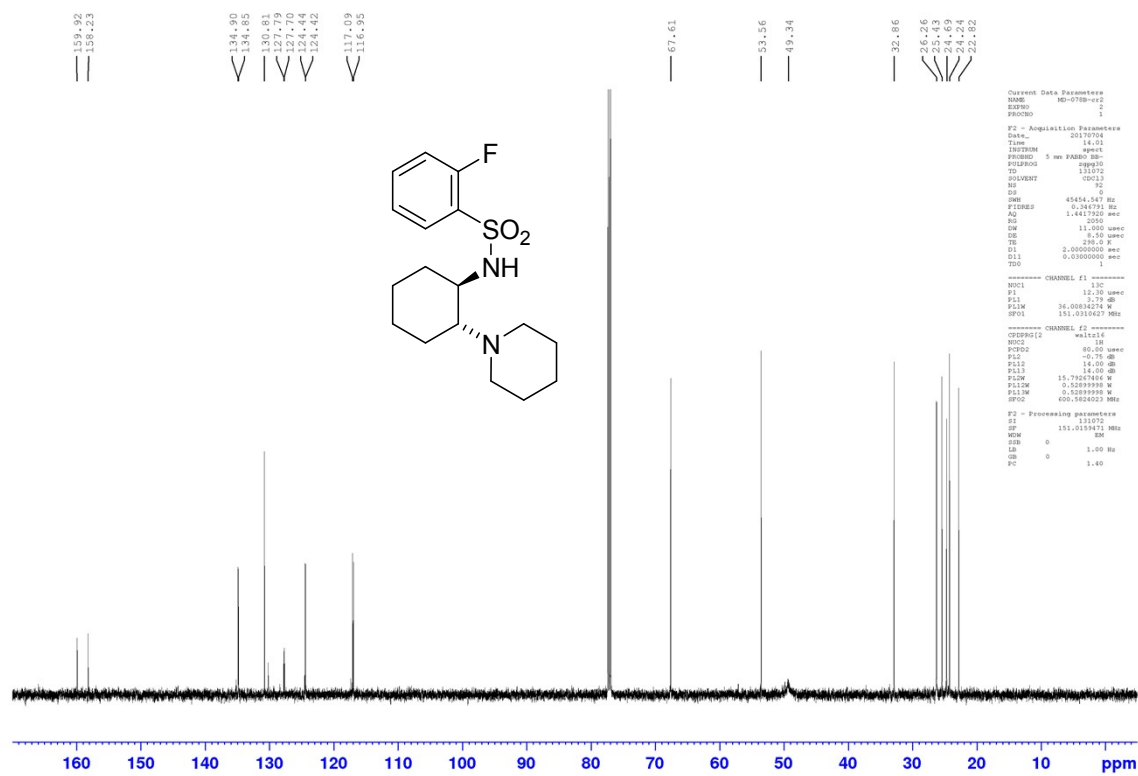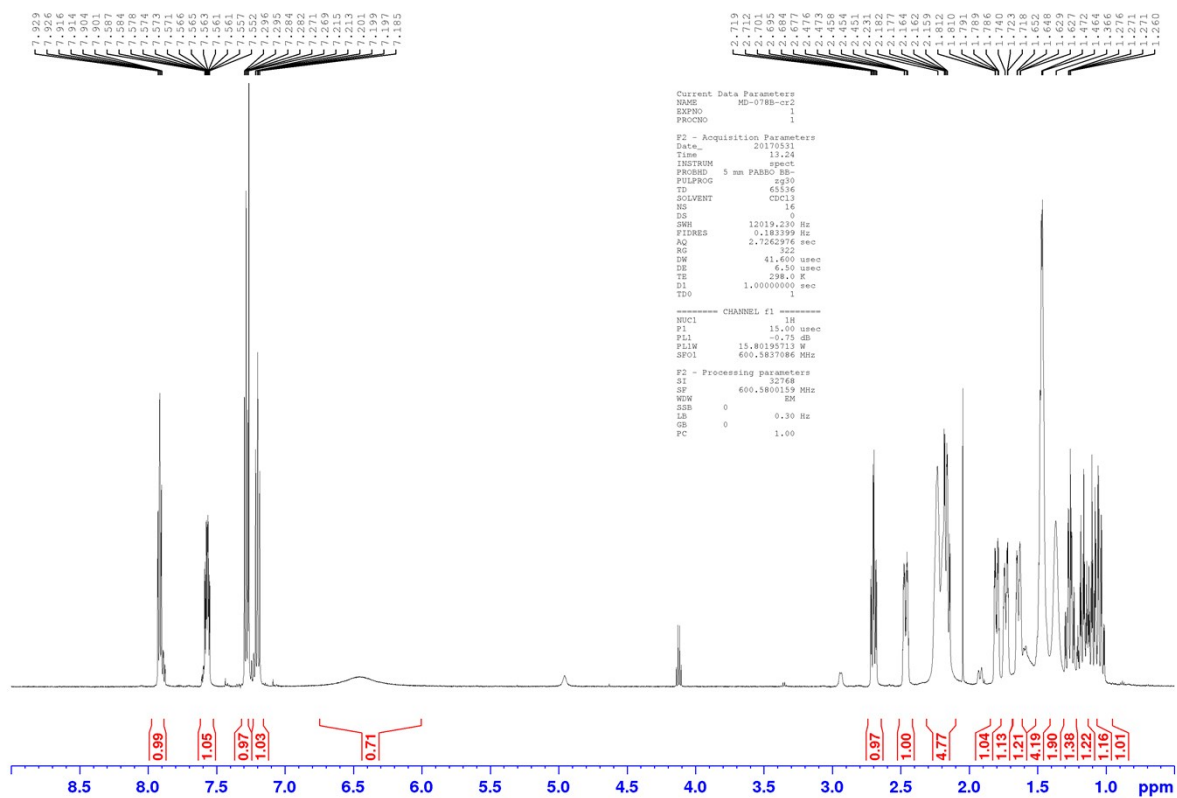

Figure S28.  $^{13}\text{C}$  and  $^1\text{H}$  NMR spectra (151 MHz, 600 MHz,  $\text{CDCl}_3$ ) for catalyst **2m**

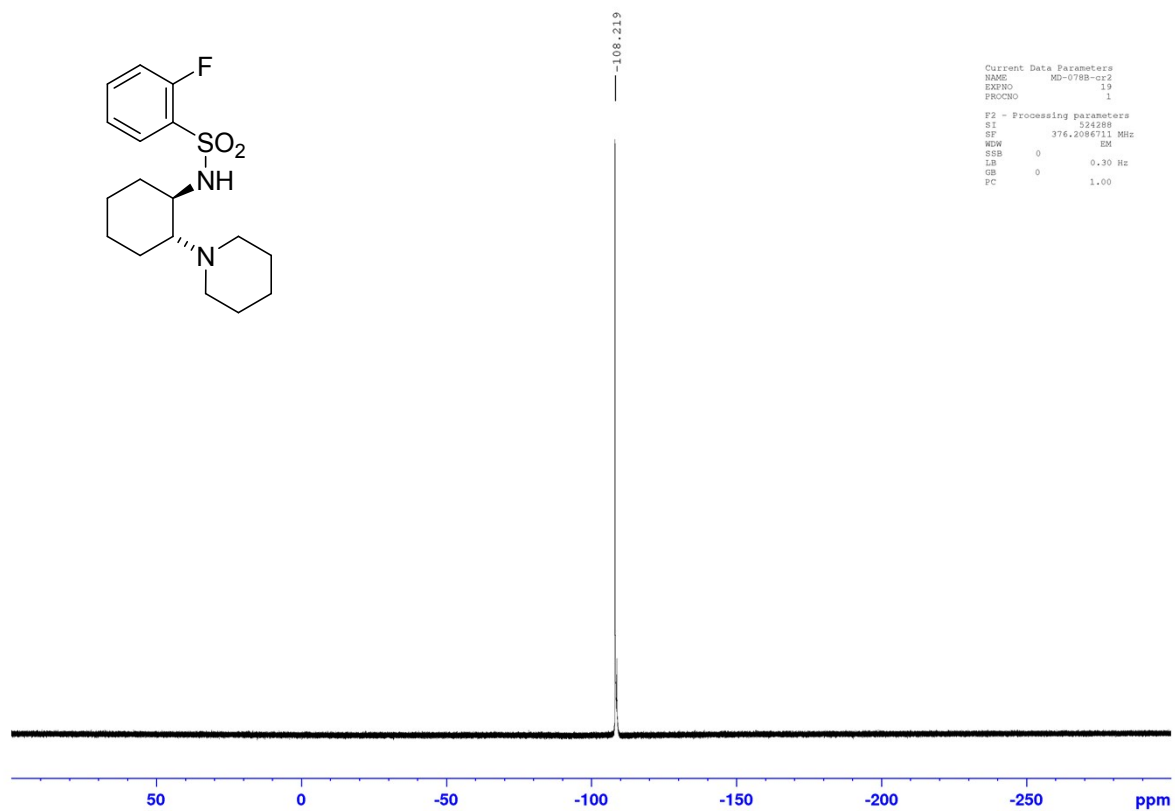

Figure S29.  $^{19}\text{F}$  NMR spectrum (376 MHz,  $\text{CDCl}_3$ ) for catalyst **2m**

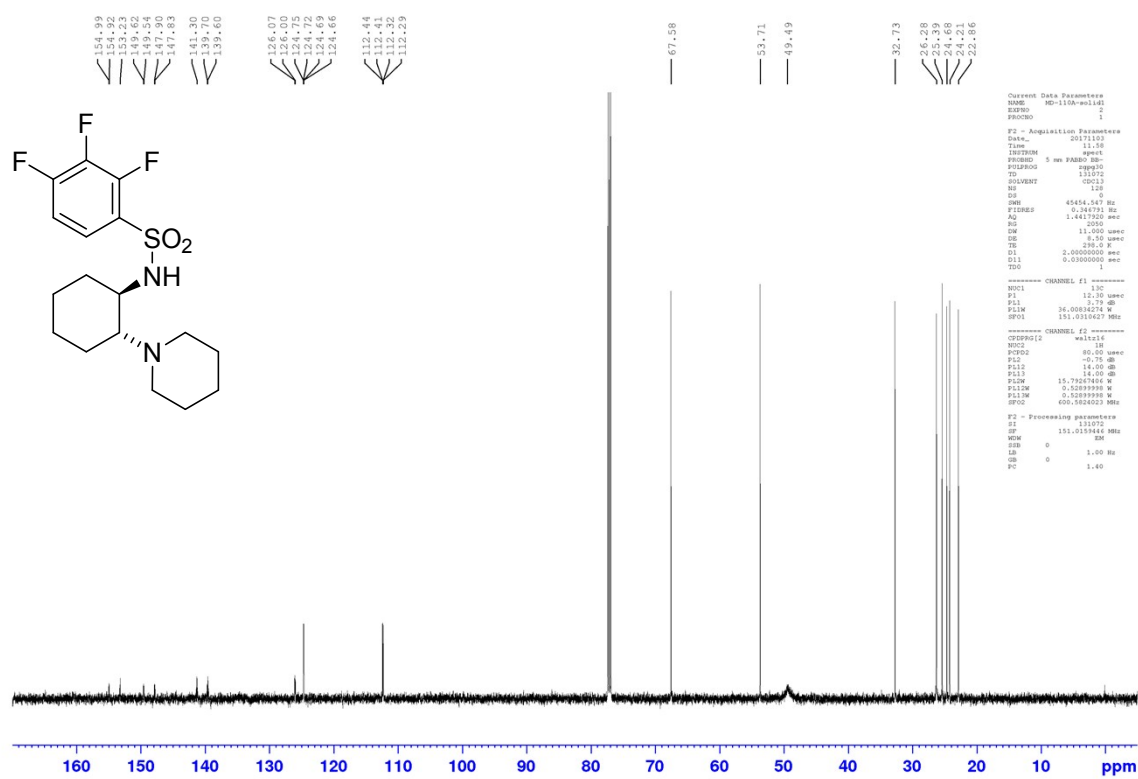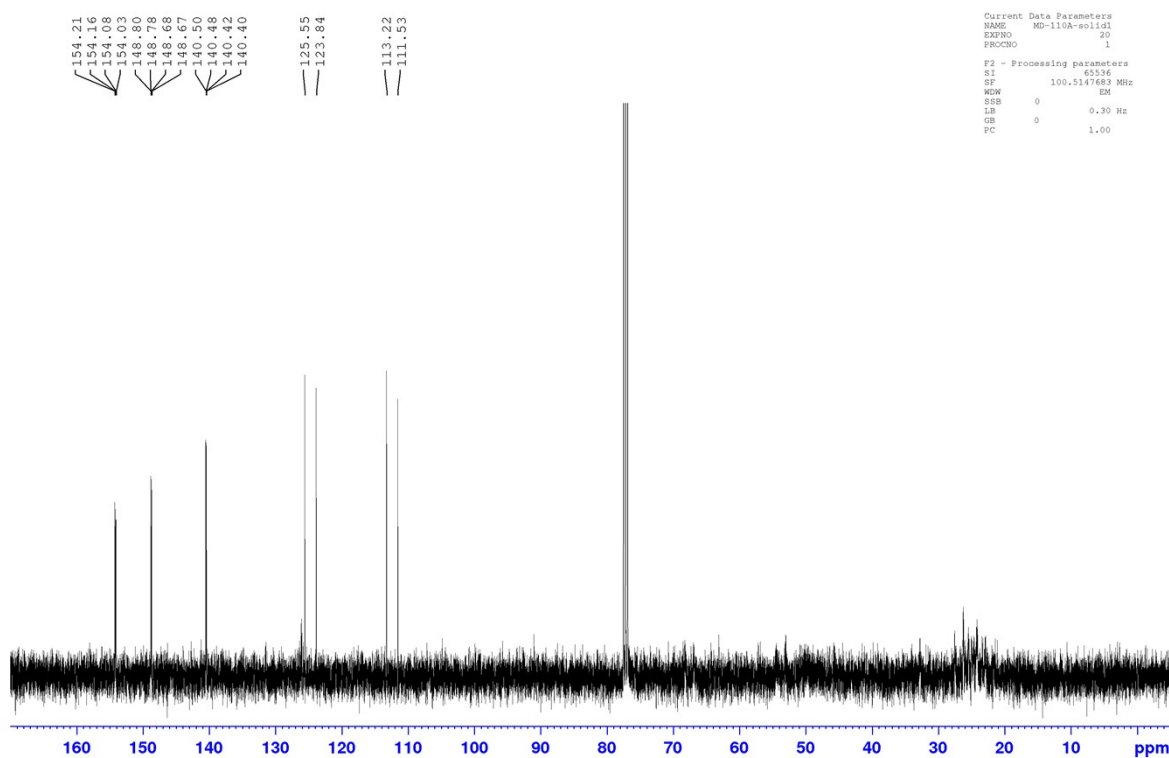

Figure S30.  $^{13}\text{C}\{^1\text{H}\}$  and  $^{13}\text{C}\{^{19}\text{F}\}$  NMR spectra (151 MHz, 101 MHz,  $\text{CDCl}_3$ ) for catalyst **2n**

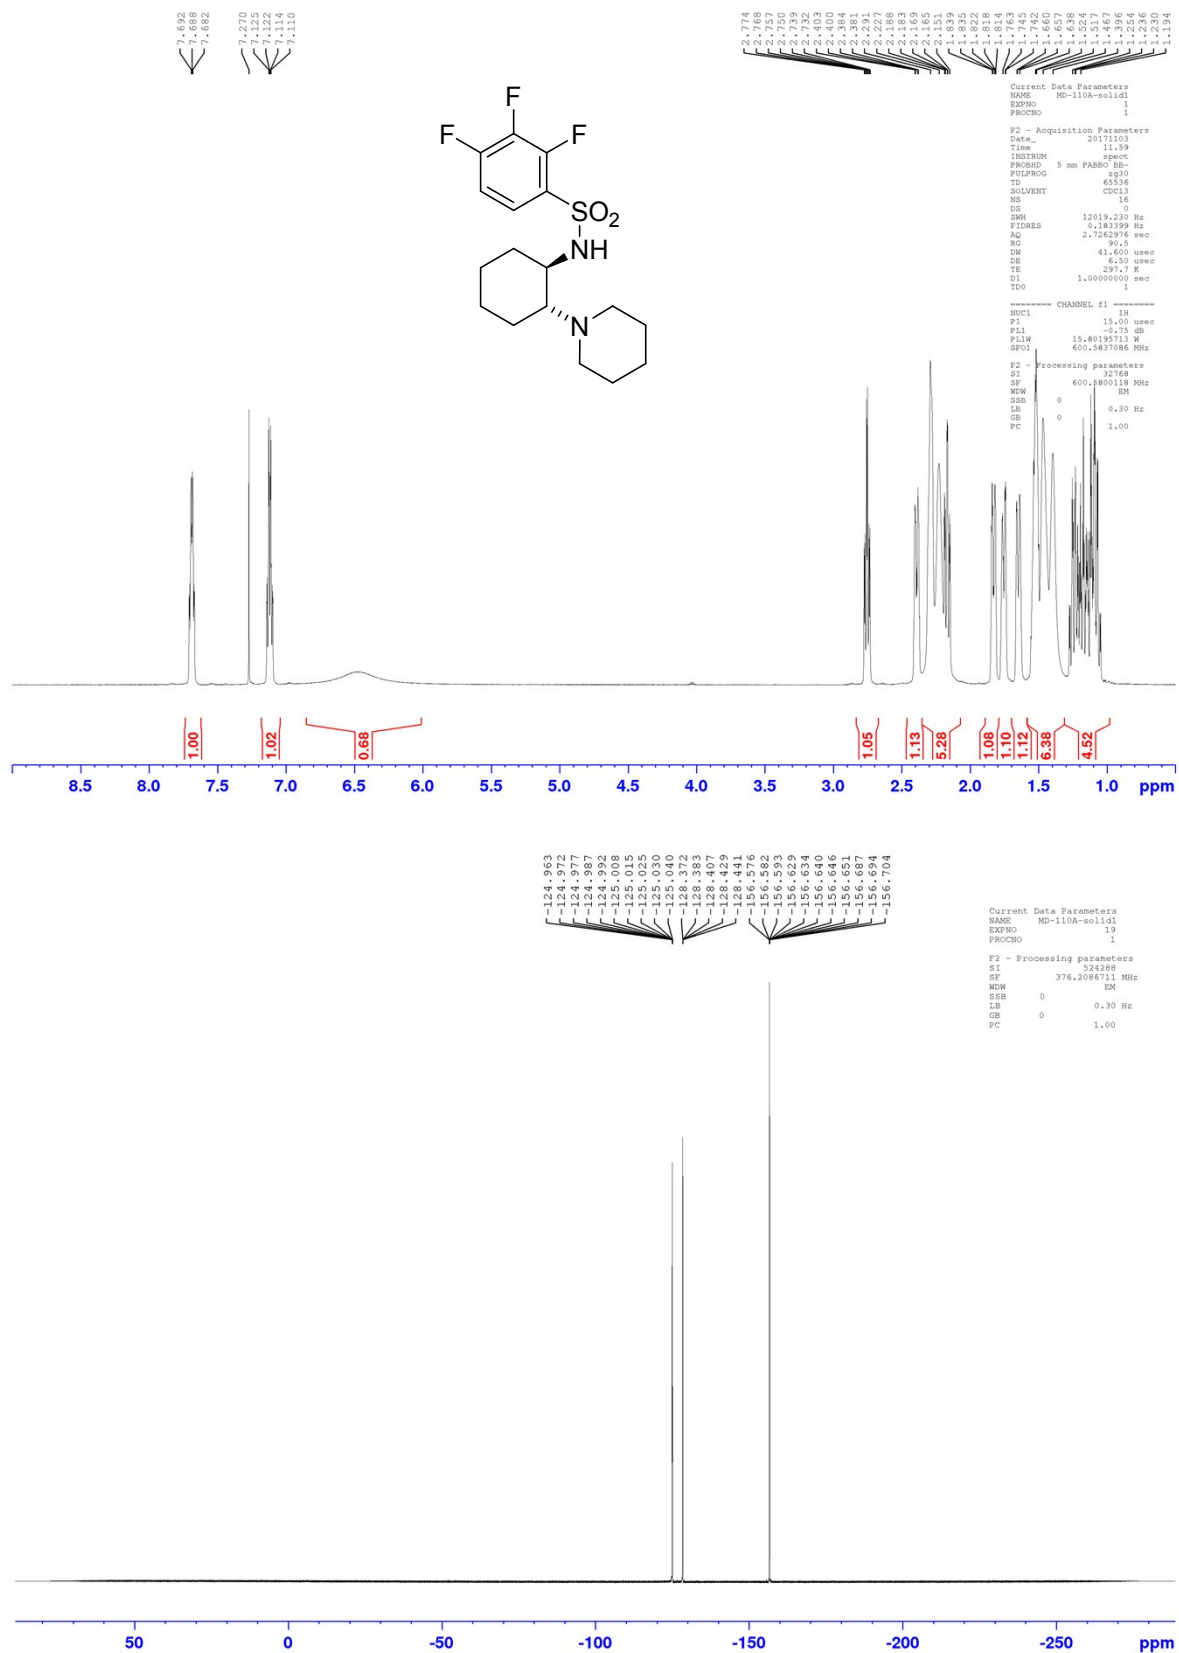

Figure S31. <sup>1</sup>H and <sup>19</sup>F NMR spectrum (600 MHz, 376 MHz, CDCl<sub>3</sub>) for catalyst **2n**

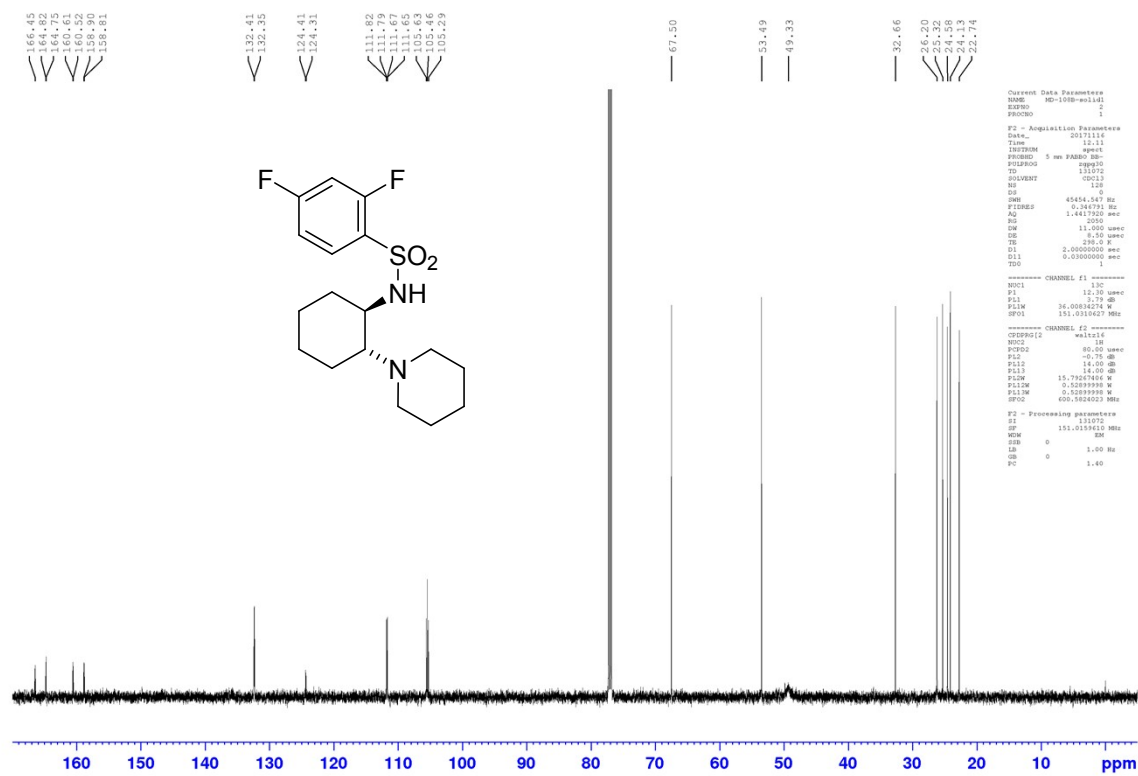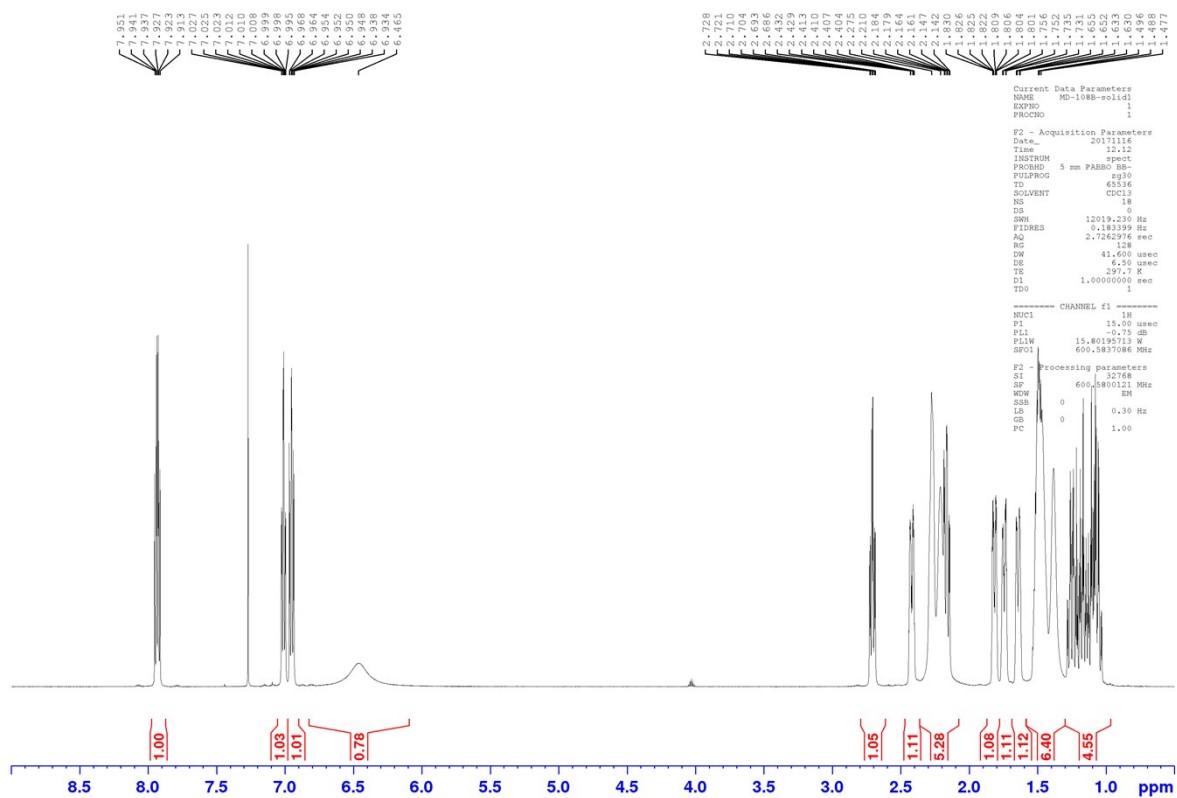

Figure S32. <sup>13</sup>C and <sup>1</sup>H NMR spectra (151 MHz, 600 MHz, CDCl<sub>3</sub>) for catalyst **2o**



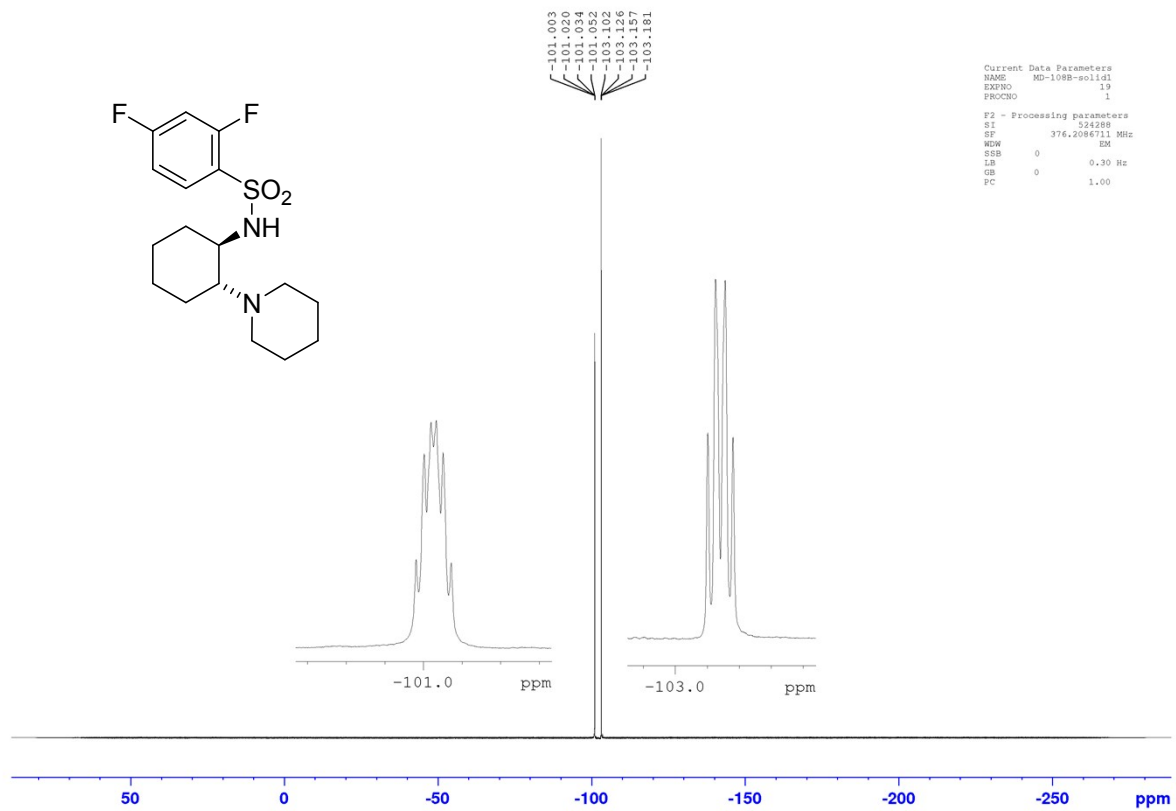

Figure S33.  $^{19}\text{F}$  NMR spectrum (376 MHz,  $\text{CDCl}_3$ ) for catalyst **2o**

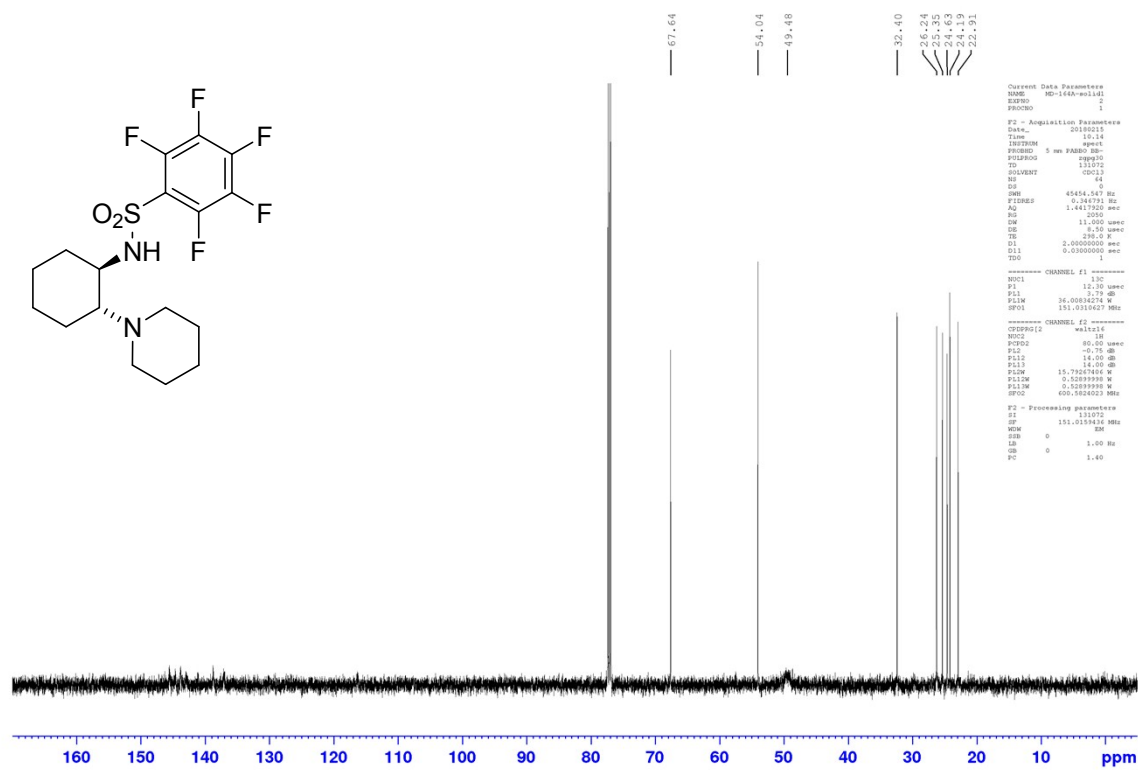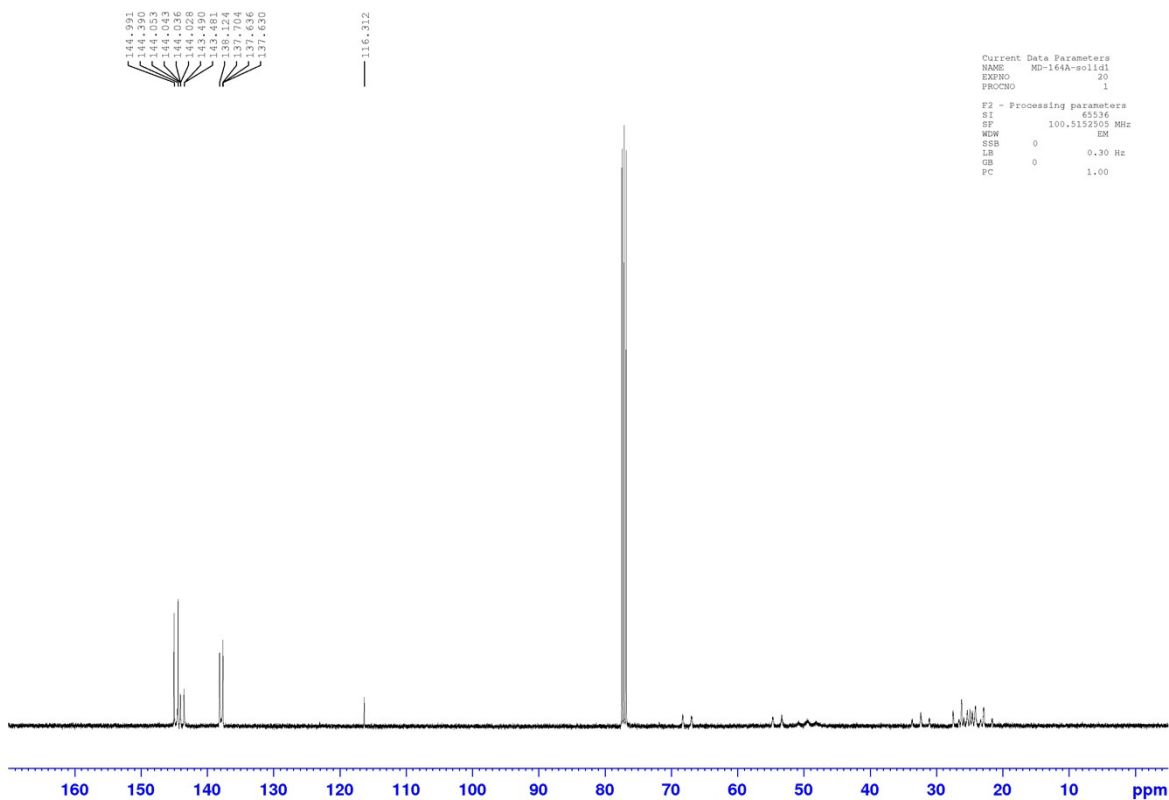

Figure S34.  $^{13}\text{C}\{^1\text{H}\}$  and  $^{13}\text{C}\{^{19}\text{F}\}$  NMR spectra (151 MHz, 101 MHz,  $\text{CDCl}_3$ ) for catalyst **2p** (note: incomplete  $^{19}\text{F}$  decoupling)

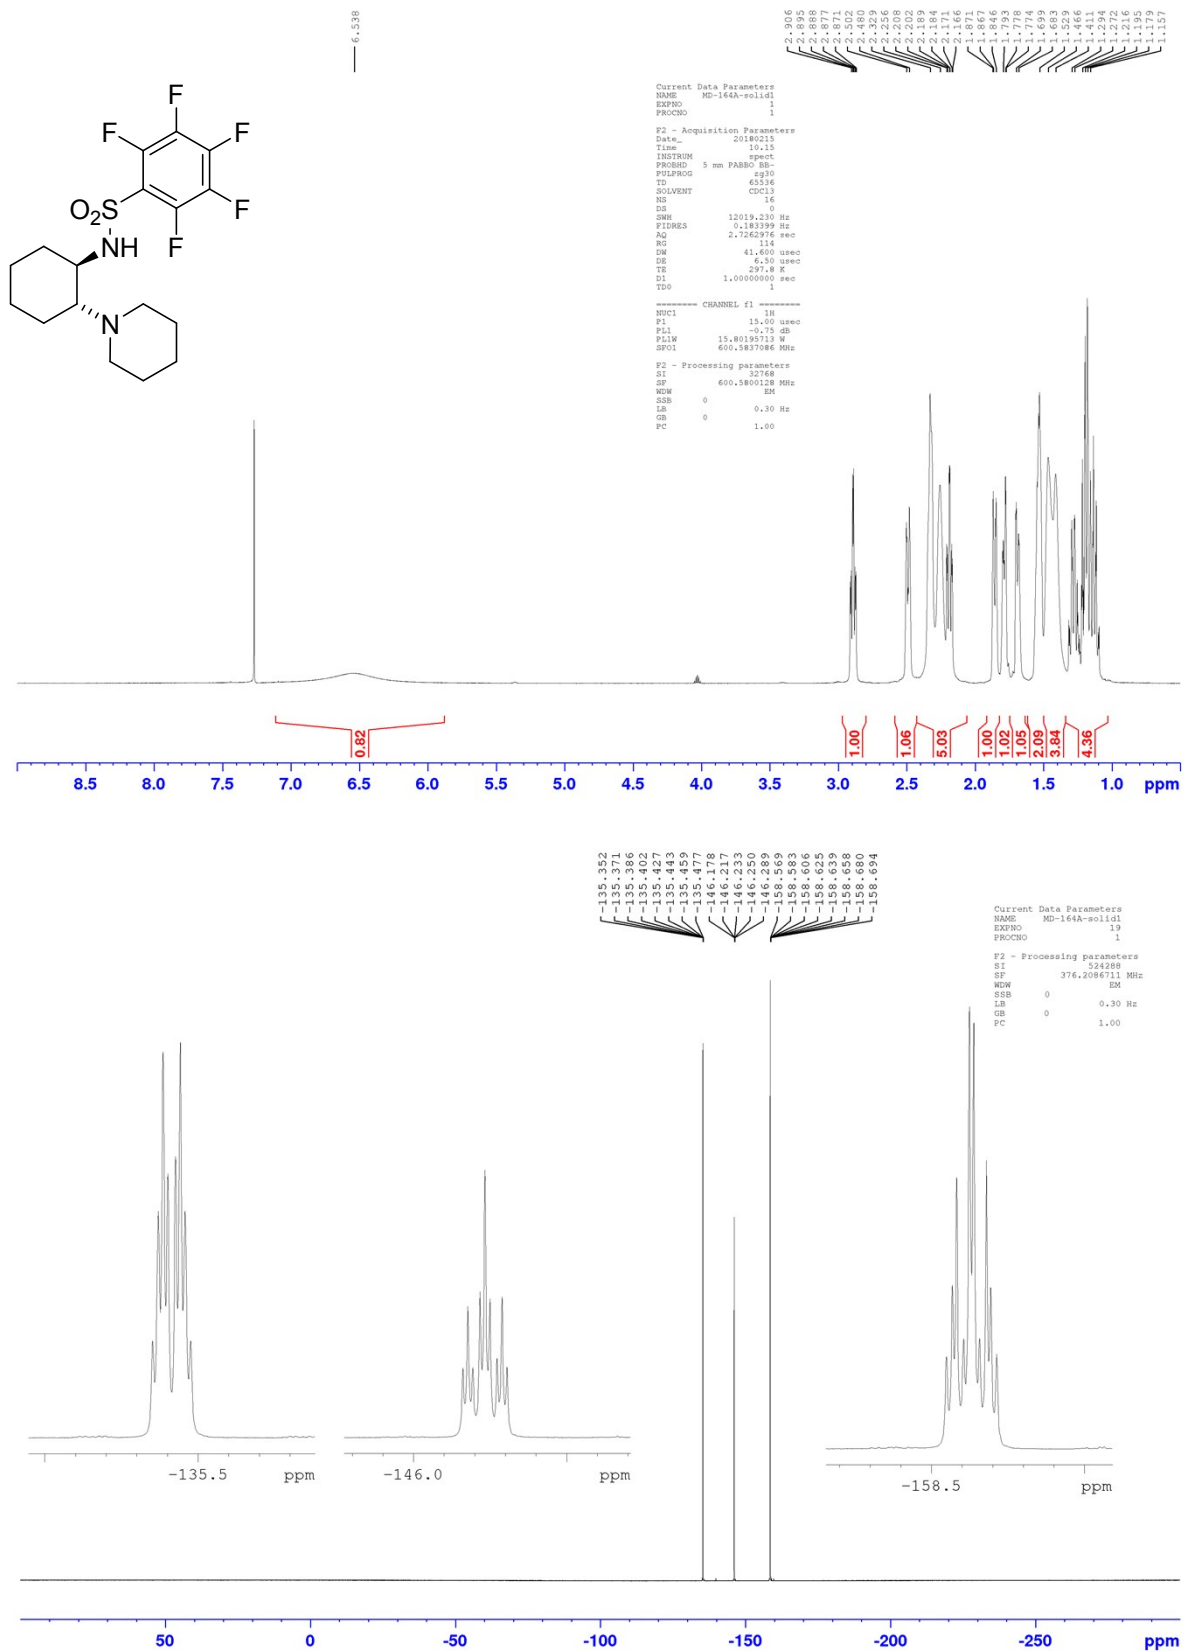

Figure S35.  $^1\text{H}$  and  $^{19}\text{F}$  NMR spectra (600 MHz, 376 MHz,  $\text{CDCl}_3$ ) for catalyst **2p**

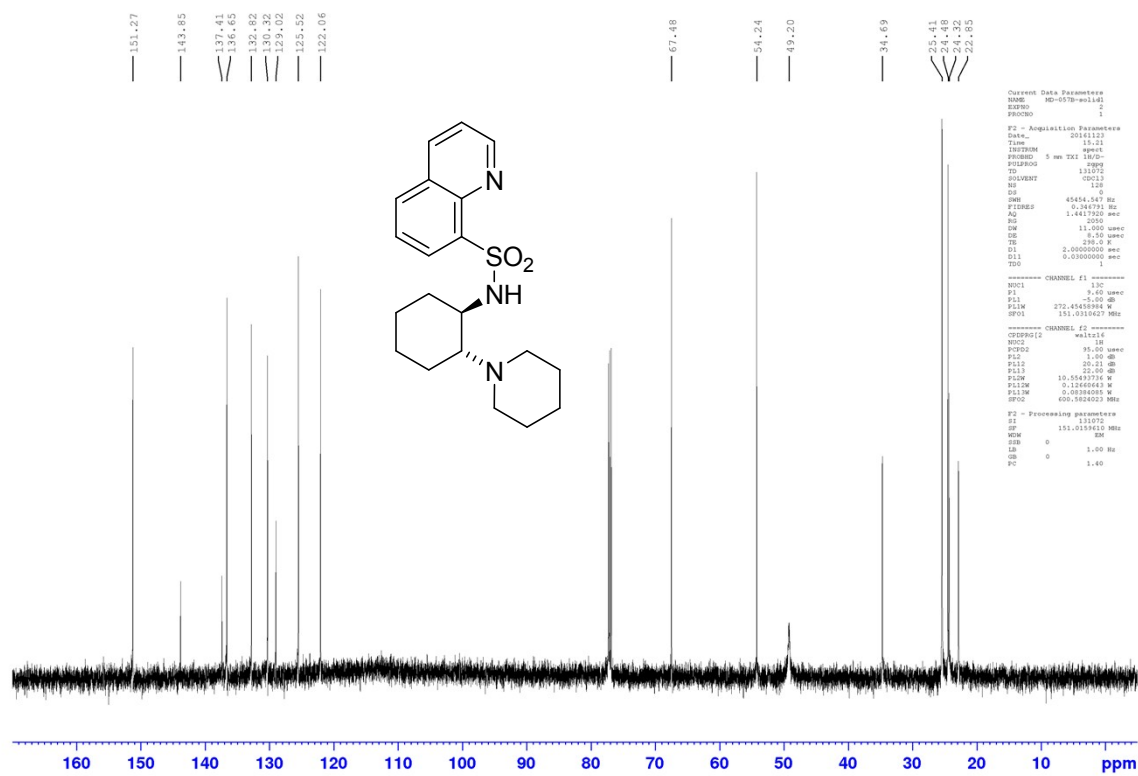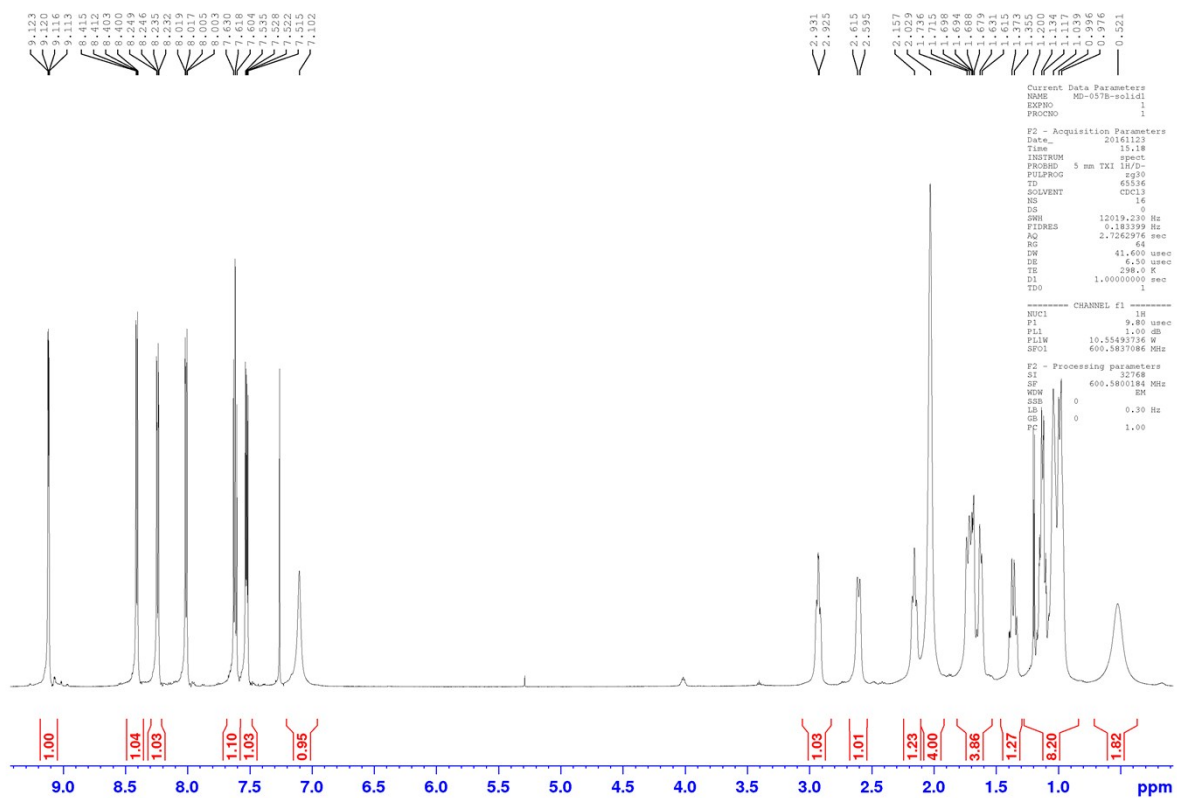

Figure S36. <sup>13</sup>C and <sup>1</sup>H NMR spectra (151 MHz, 600 MHz, CDCl<sub>3</sub>) for catalyst **2q**

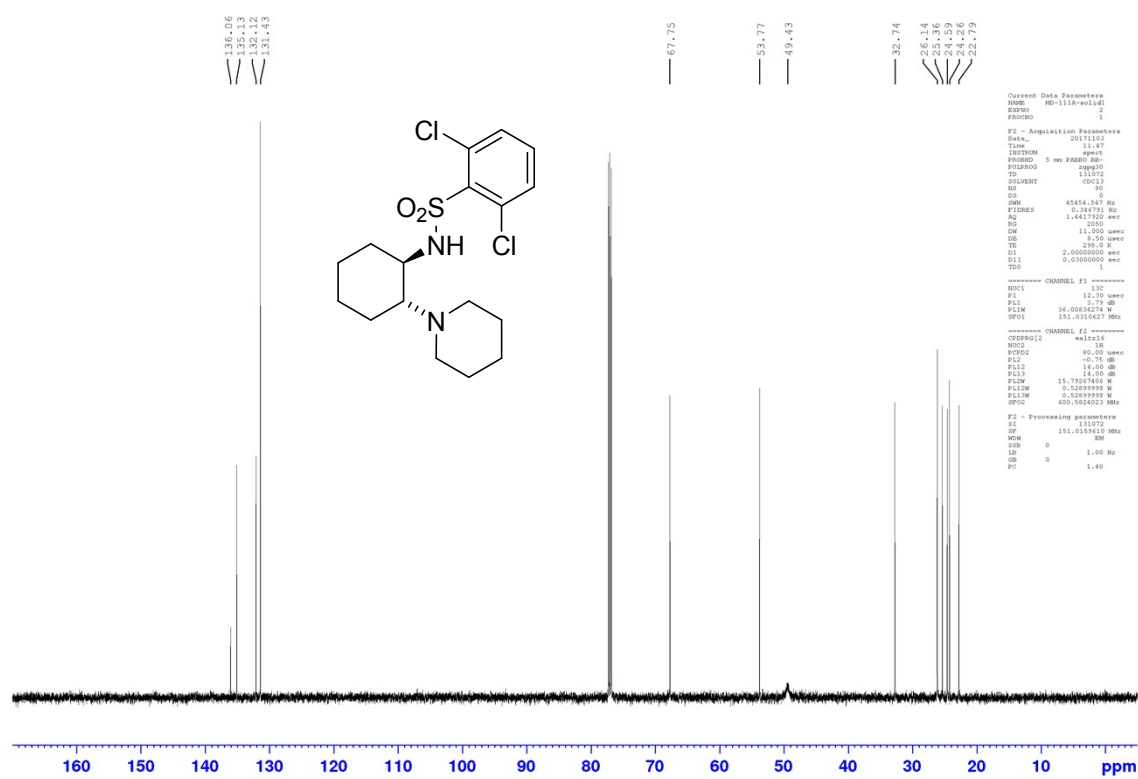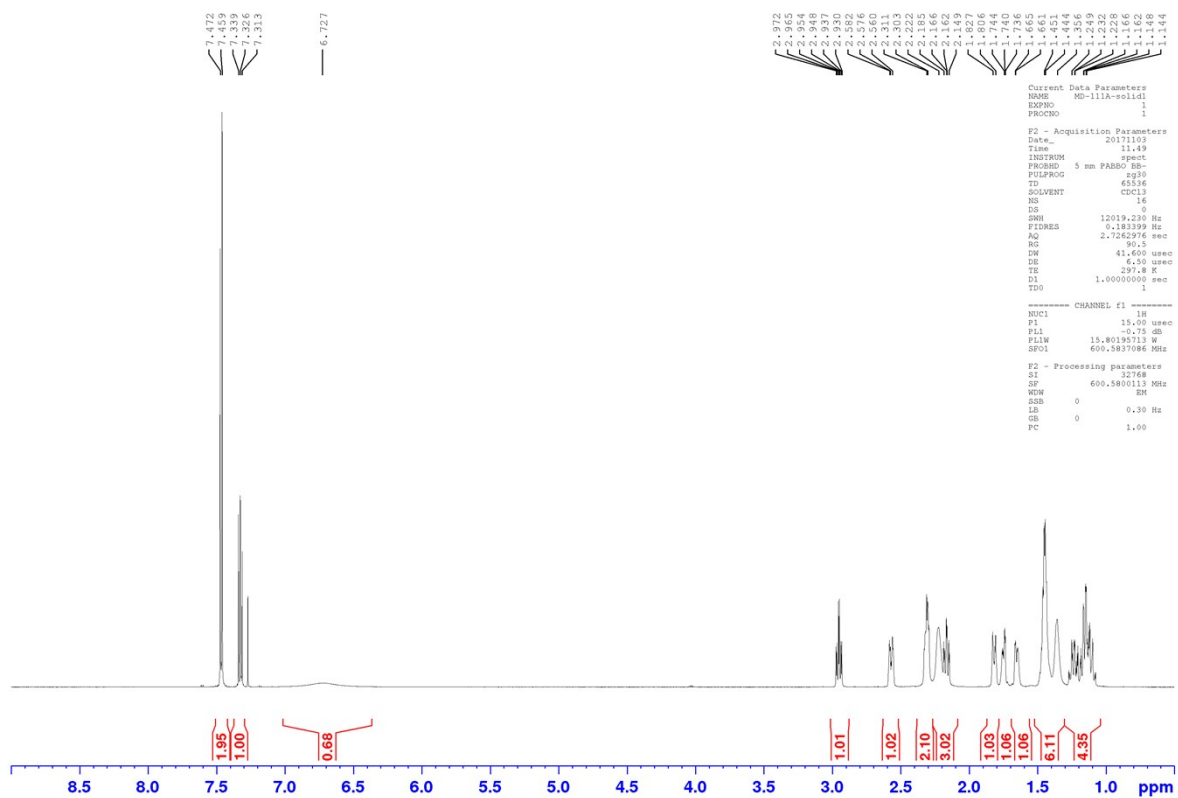

Figure S37. <sup>13</sup>C and <sup>1</sup>H NMR spectra (151 MHz, 600 MHz, CDCl<sub>3</sub>) for catalyst **2r**

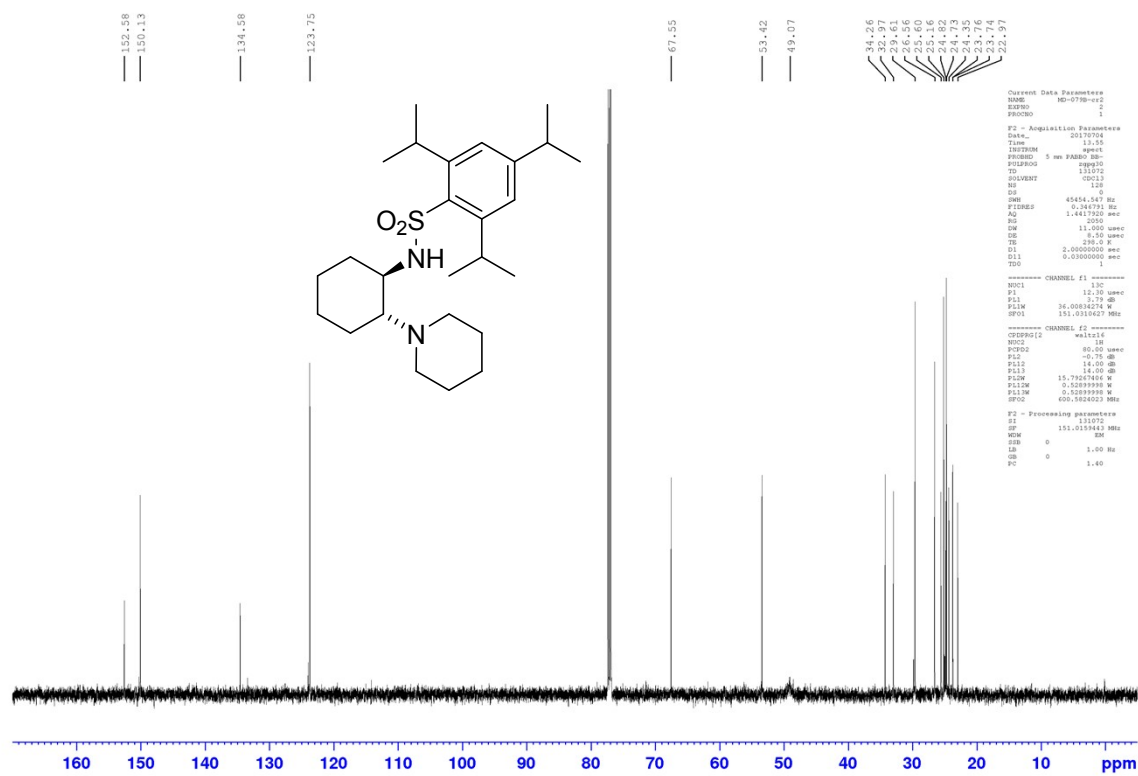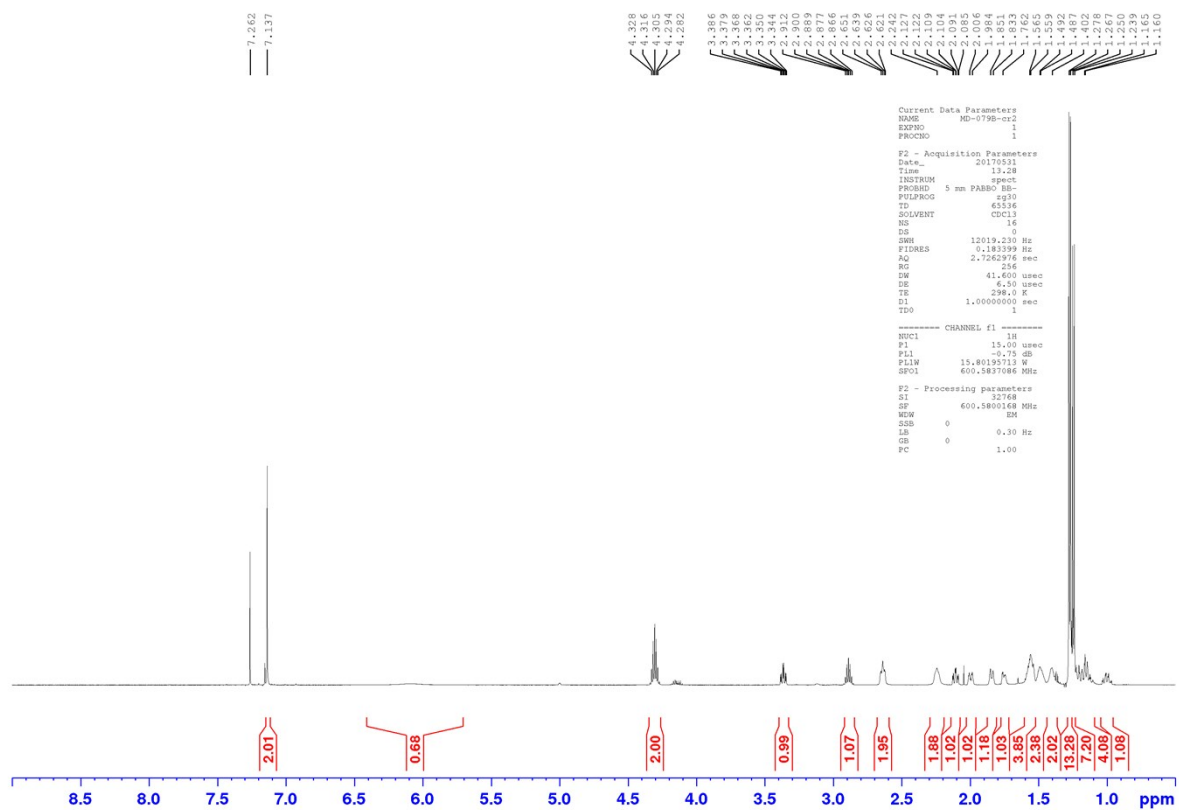

Figure S38.  $^{13}\text{C}$  and  $^1\text{H}$  NMR spectra (151 MHz, 600 MHz,  $\text{CDCl}_3$ ) for catalyst 2s

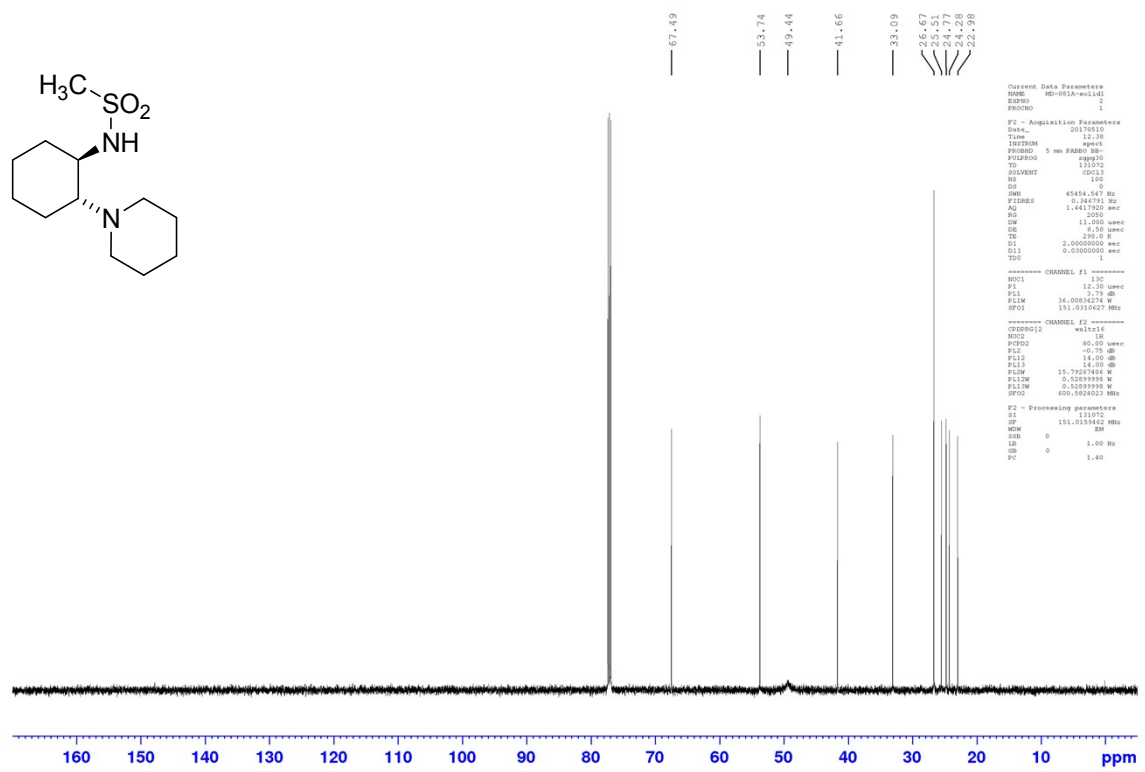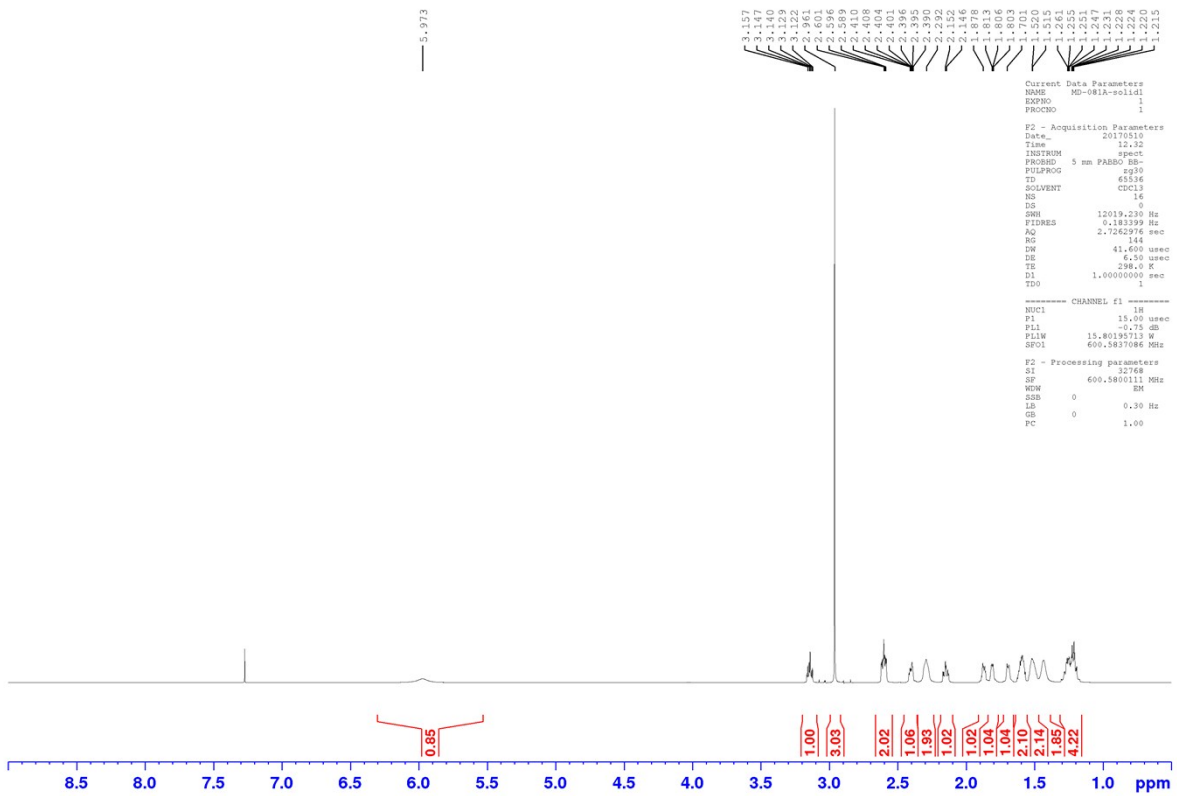

Figure S39.  $^{13}\text{C}$  and  $^1\text{H}$  NMR spectra (151 MHz, 600 MHz,  $\text{CDCl}_3$ ) for catalyst **2t**

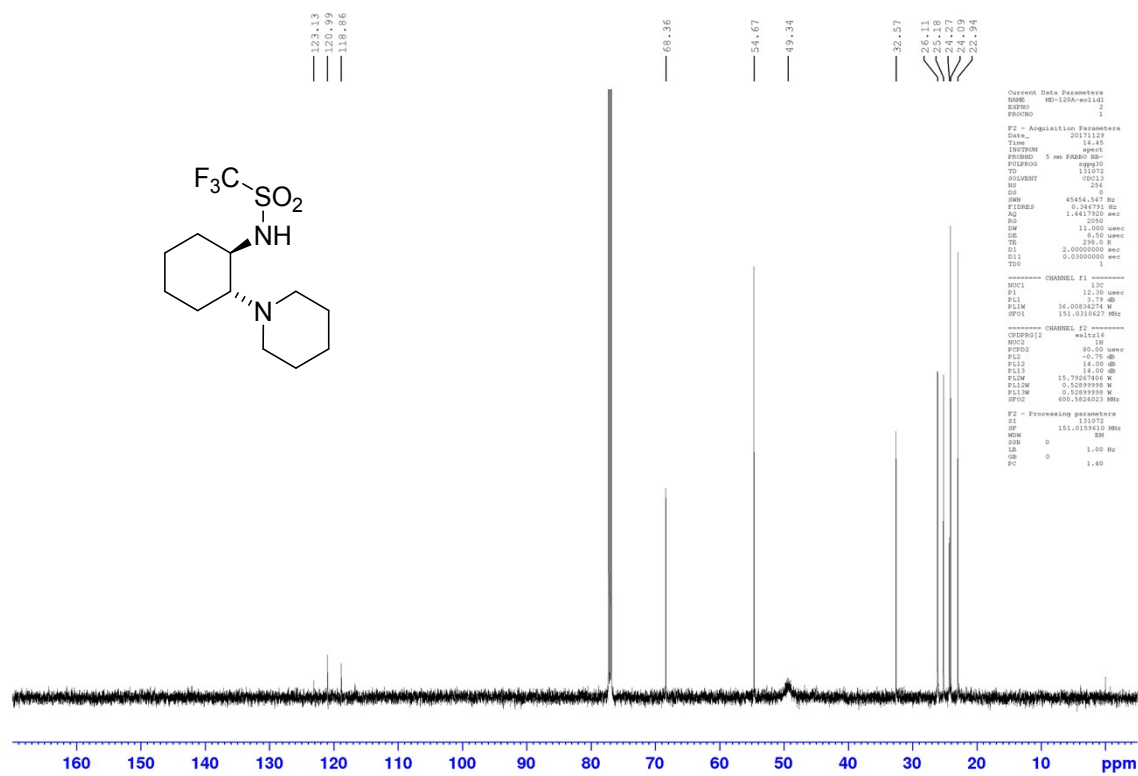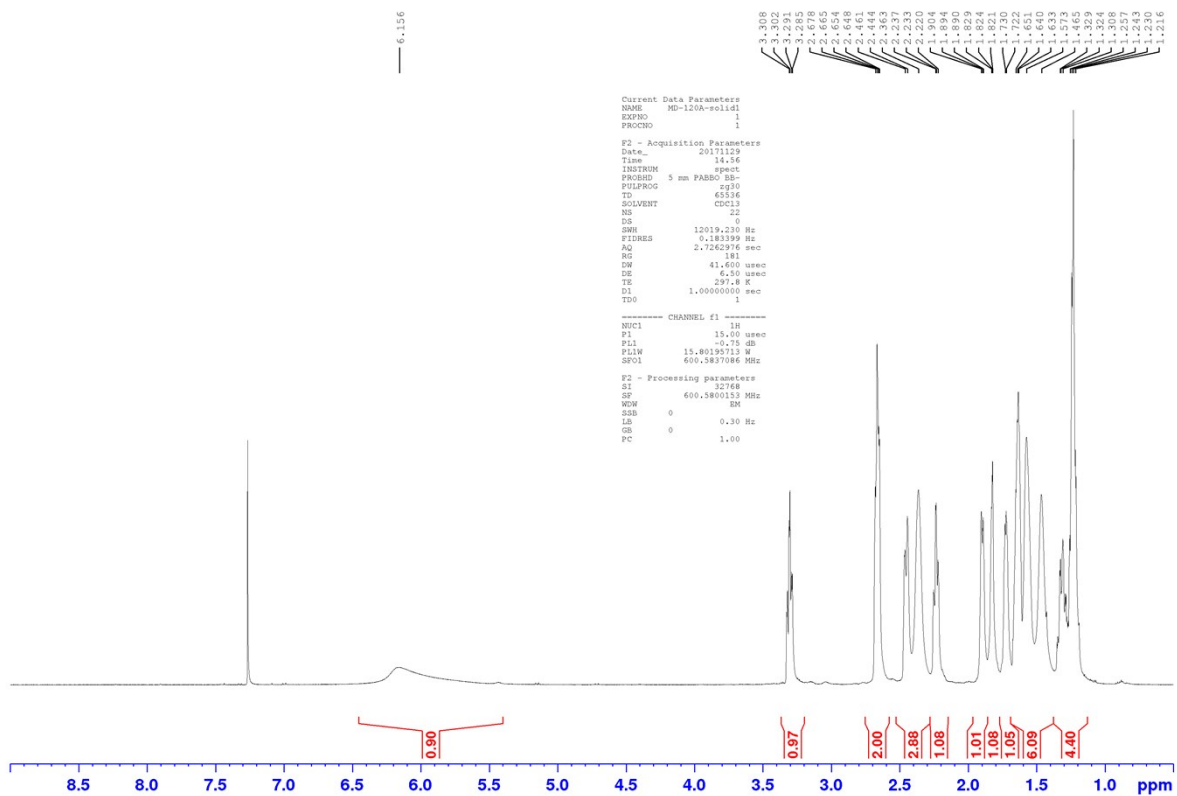

Figure S40. <sup>13</sup>C and <sup>1</sup>H NMR spectra (151 MHz, 600 MHz, CDCl<sub>3</sub>) for catalyst **2u**



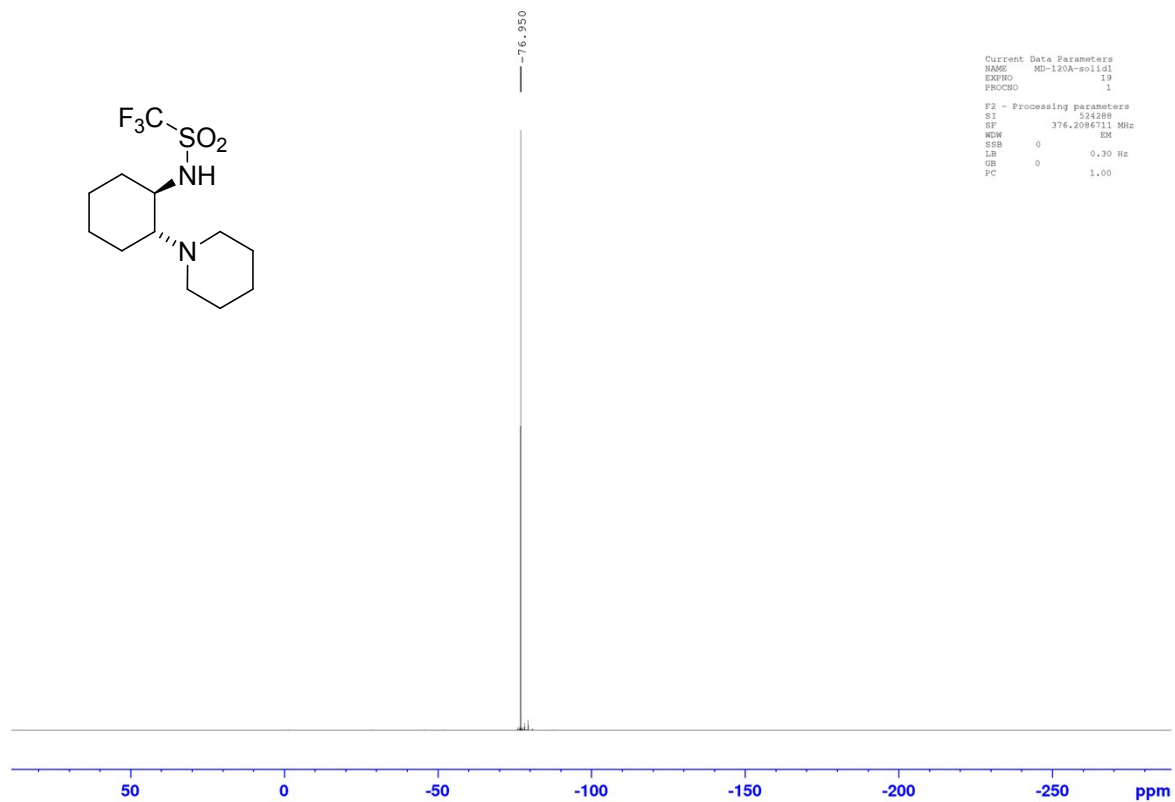

Figure S41. <sup>19</sup>F NMR spectrum (376 MHz, CDCl<sub>3</sub>) for catalyst **2u**

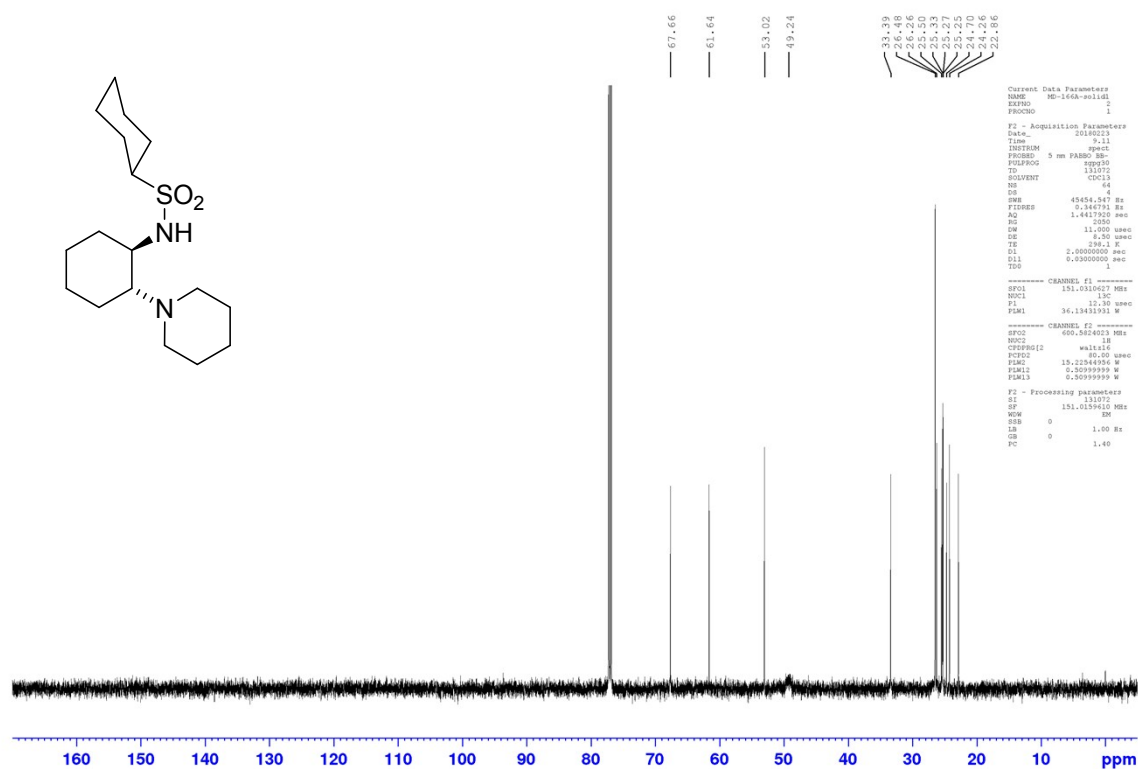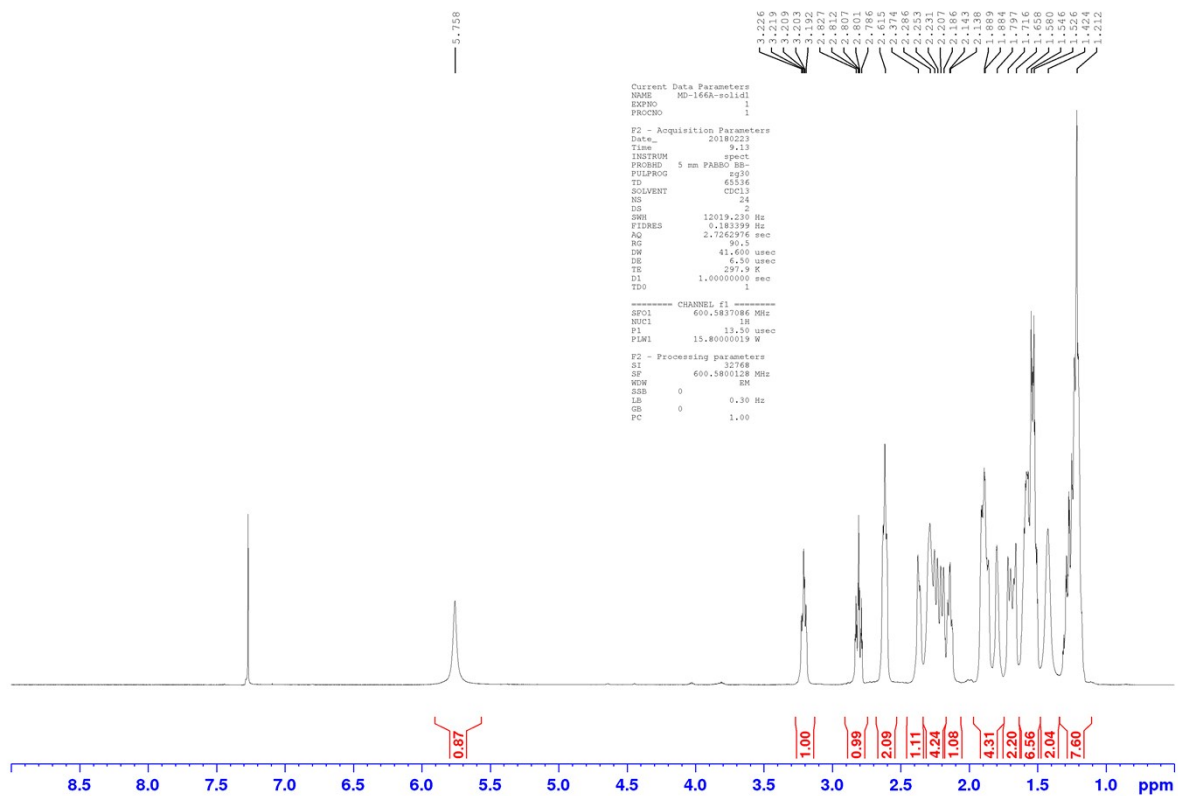

Figure S42. <sup>13</sup>C and <sup>1</sup>H NMR spectra (151 MHz, 600 MHz, CDCl<sub>3</sub>) for catalyst **2v**

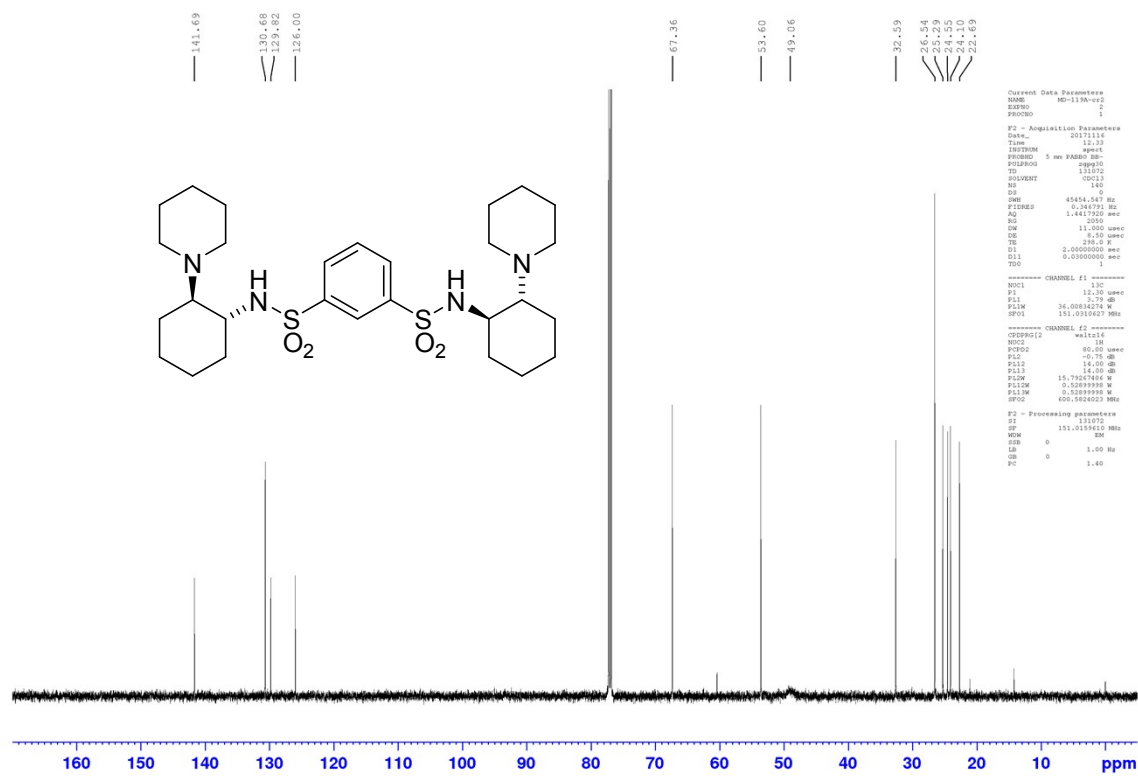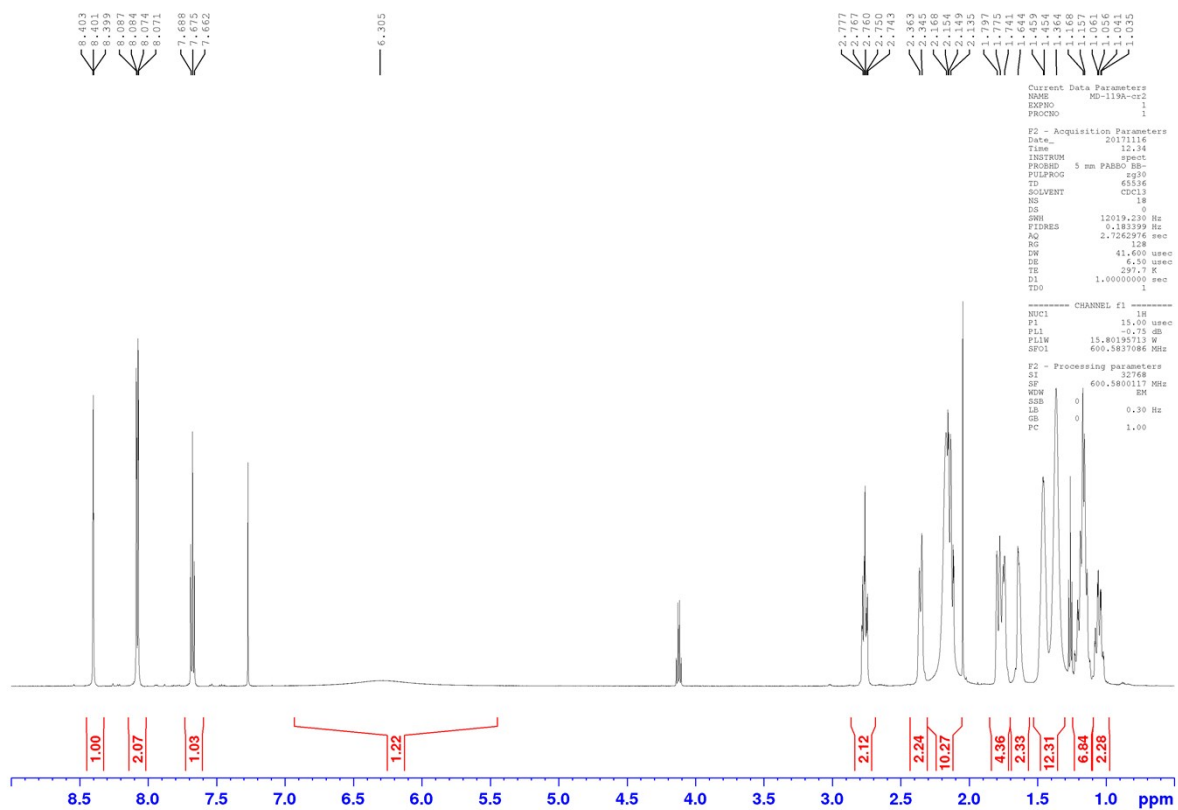

Figure S43. <sup>13</sup>C and <sup>1</sup>H NMR spectra (151 MHz, 600 MHz, CDCl<sub>3</sub>) for catalyst **2w**

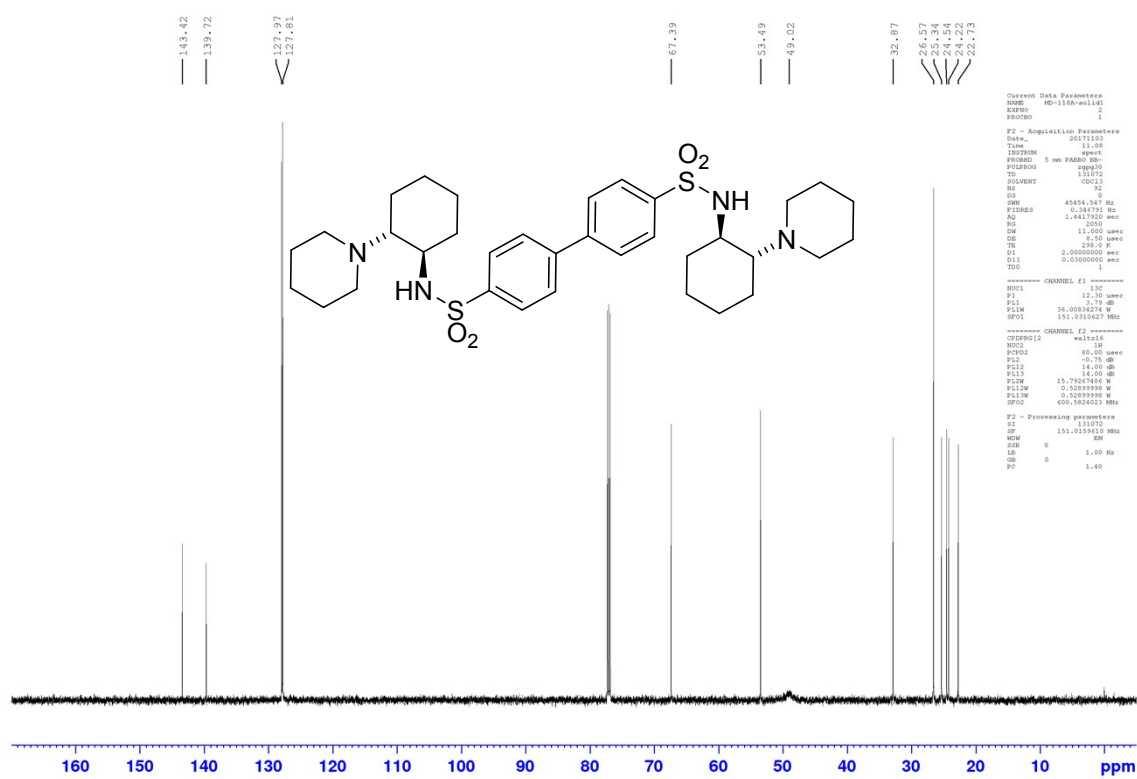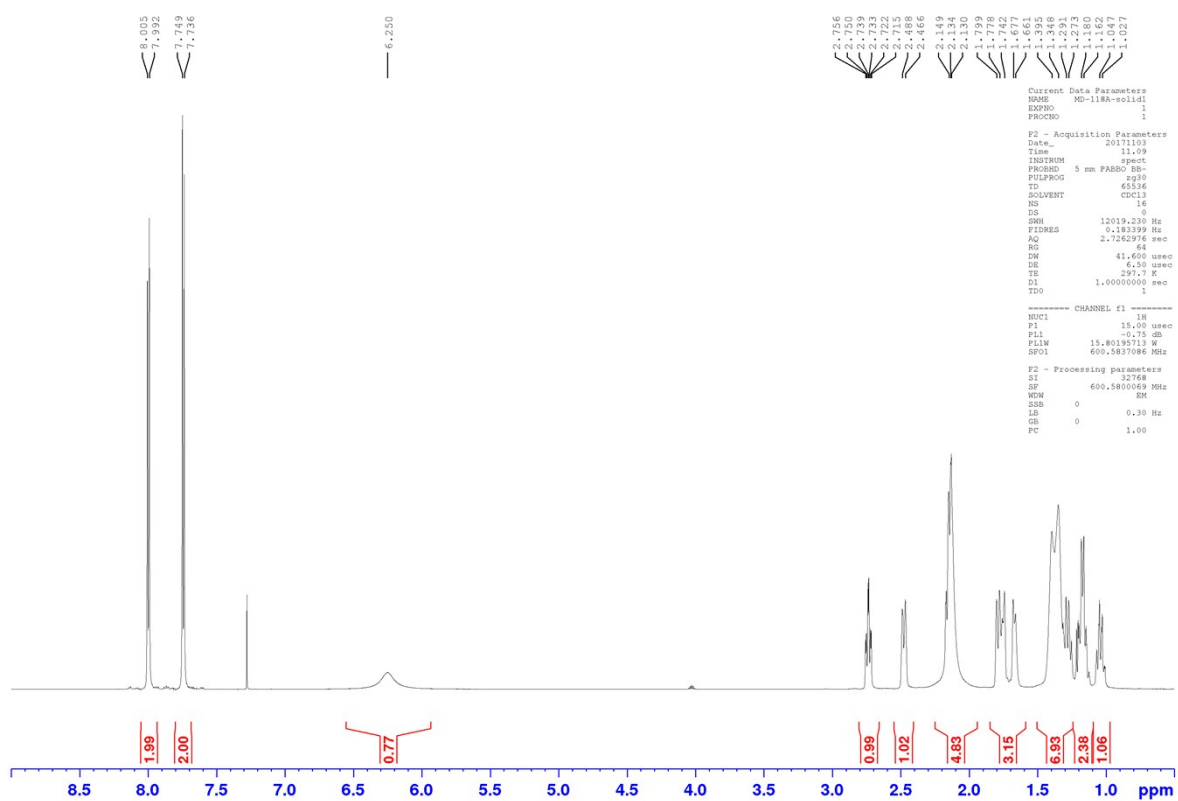

Figure S44.  $^{13}\text{C}$  and  $^1\text{H}$  NMR spectra (151 MHz, 600 MHz,  $\text{CDCl}_3$ ) for catalyst 2x

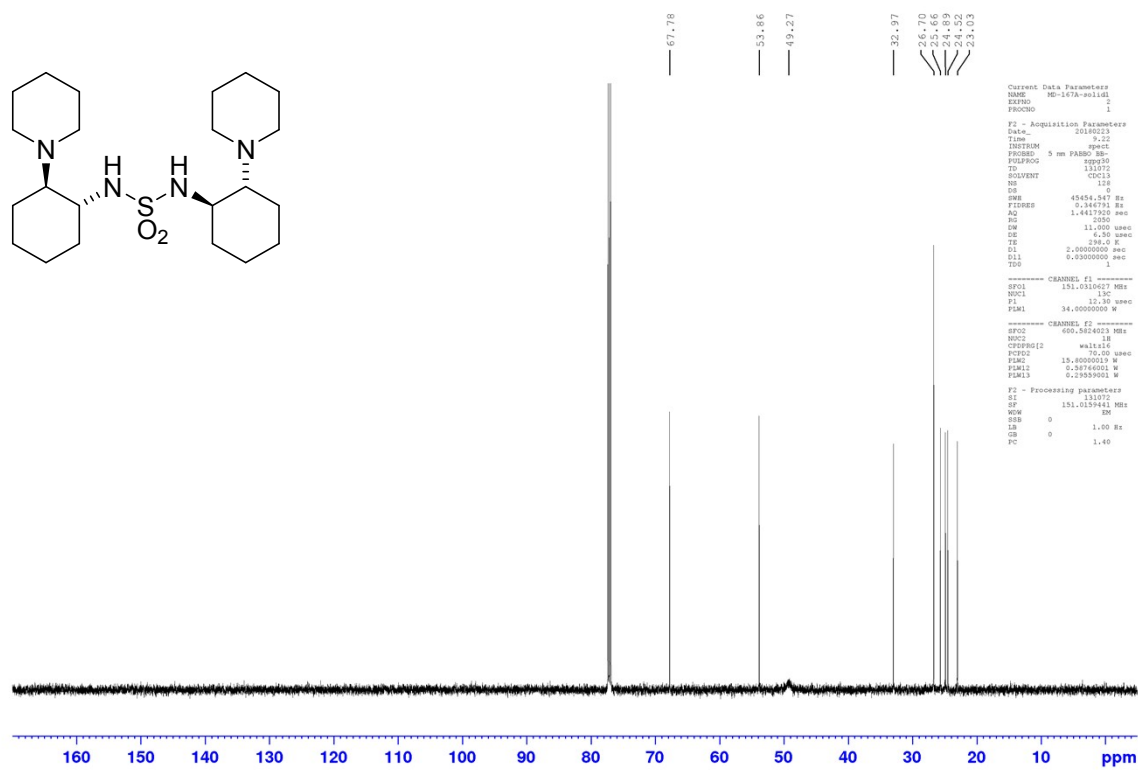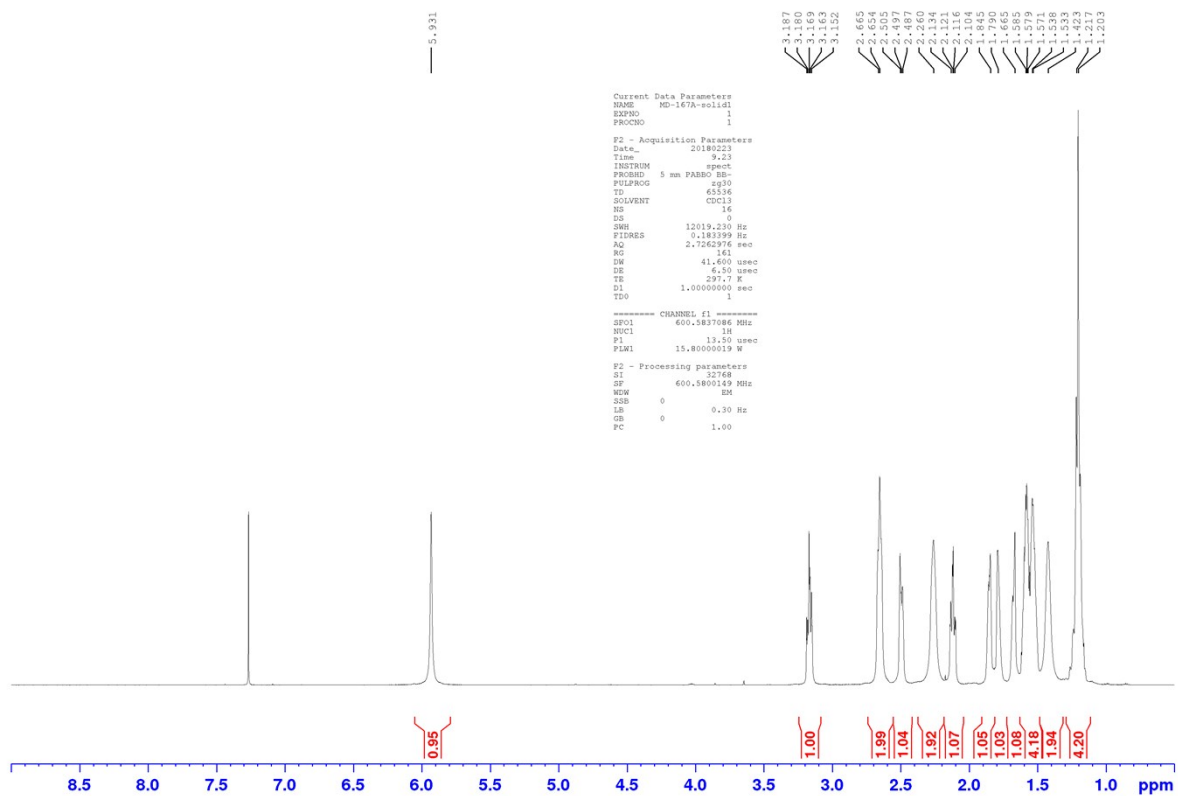

Figure S45.  $^{13}\text{C}$  and  $^1\text{H}$  NMR spectra (151 MHz, 600 MHz,  $\text{CDCl}_3$ ) for catalyst **2y**

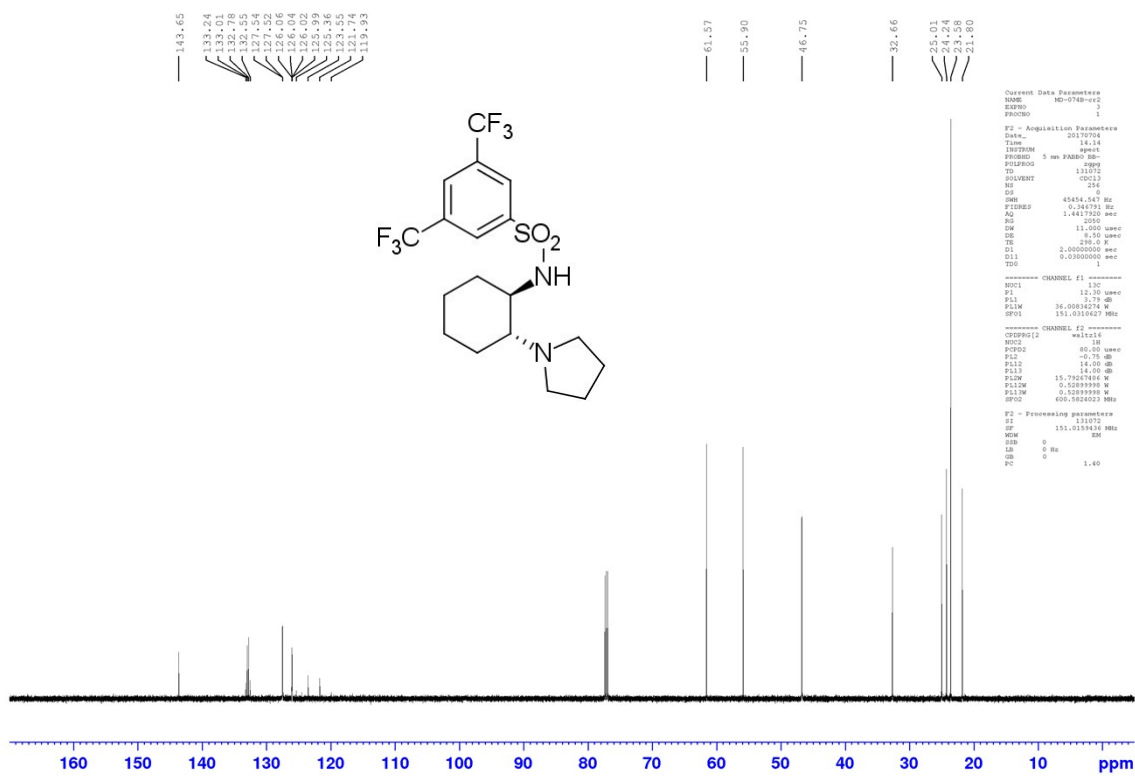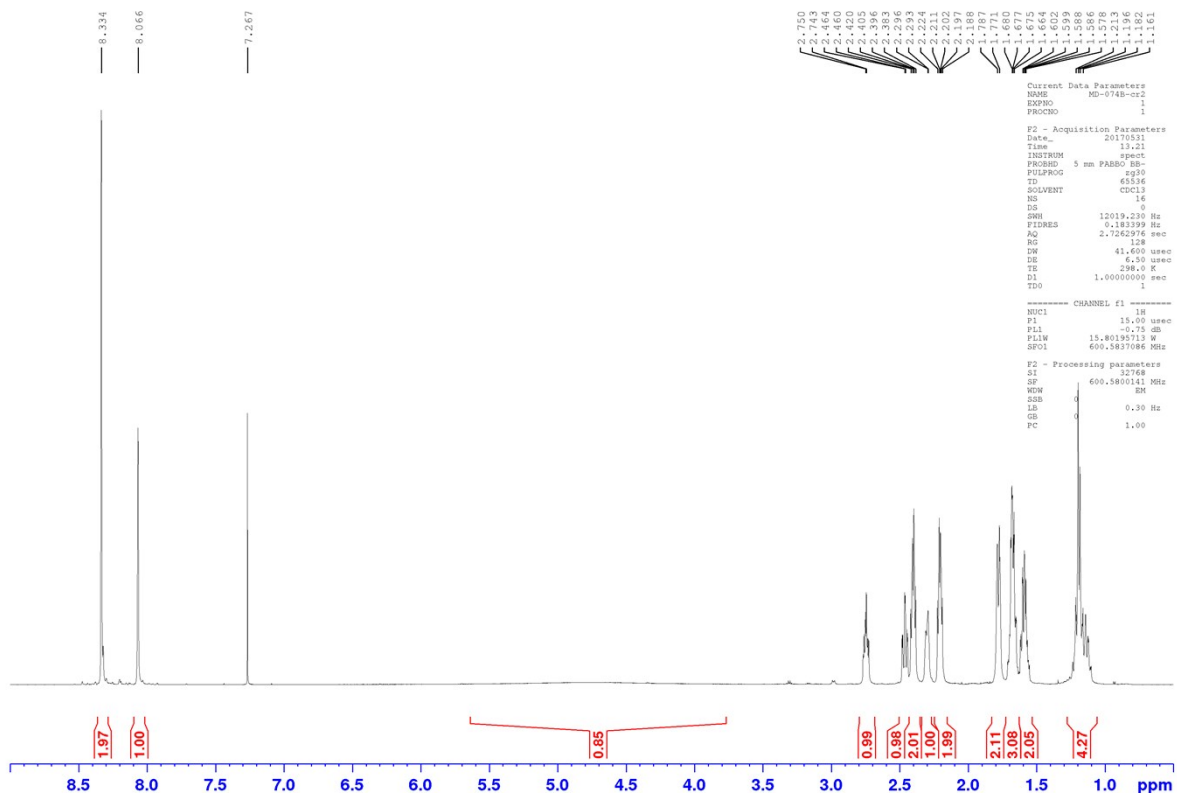

Figure S46. <sup>13</sup>C and <sup>1</sup>H NMR spectra (151 MHz, 600 MHz, CDCl<sub>3</sub>) for catalyst **1a**

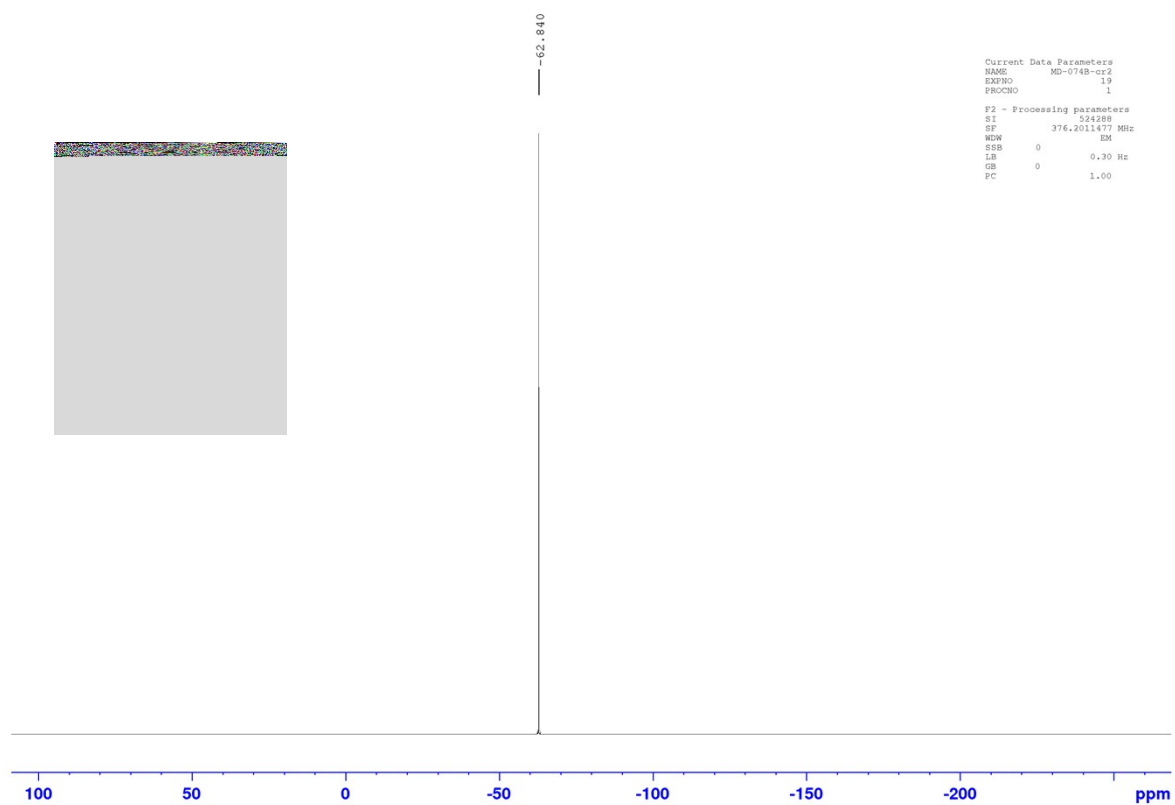

Figure S47.  $^{19}\text{F}$  NMR spectrum (376 MHz,  $\text{CDCl}_3$ ) for catalyst **1a**

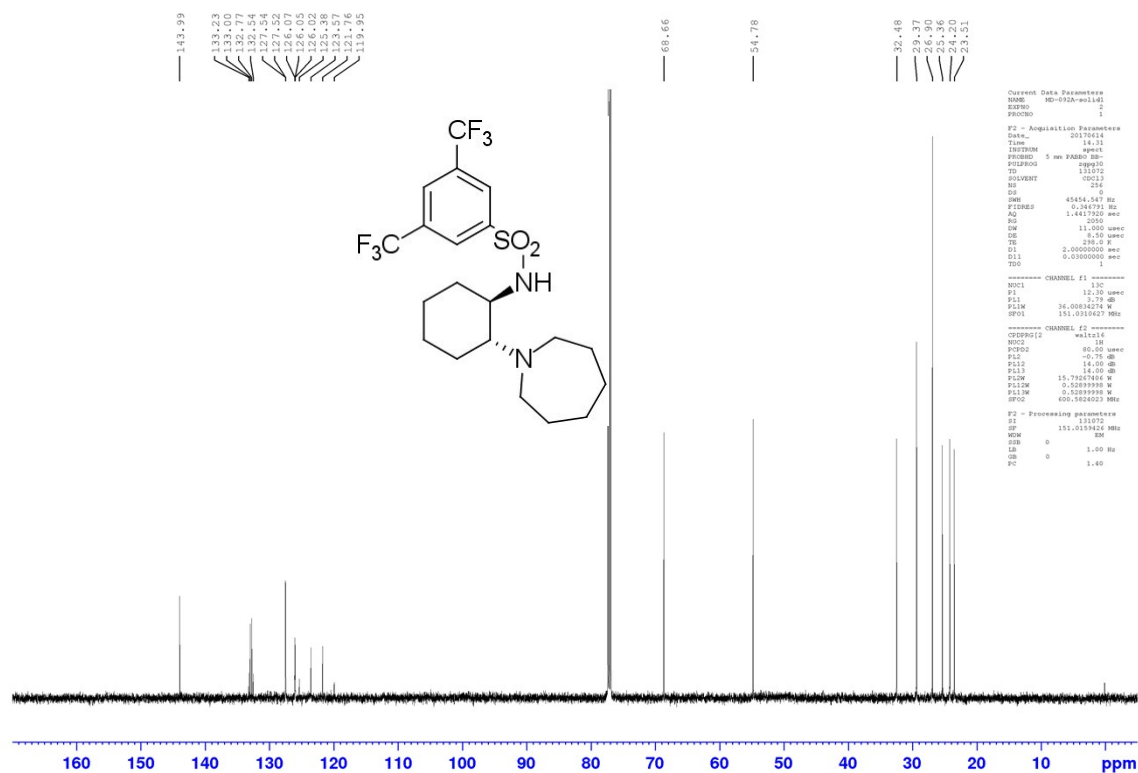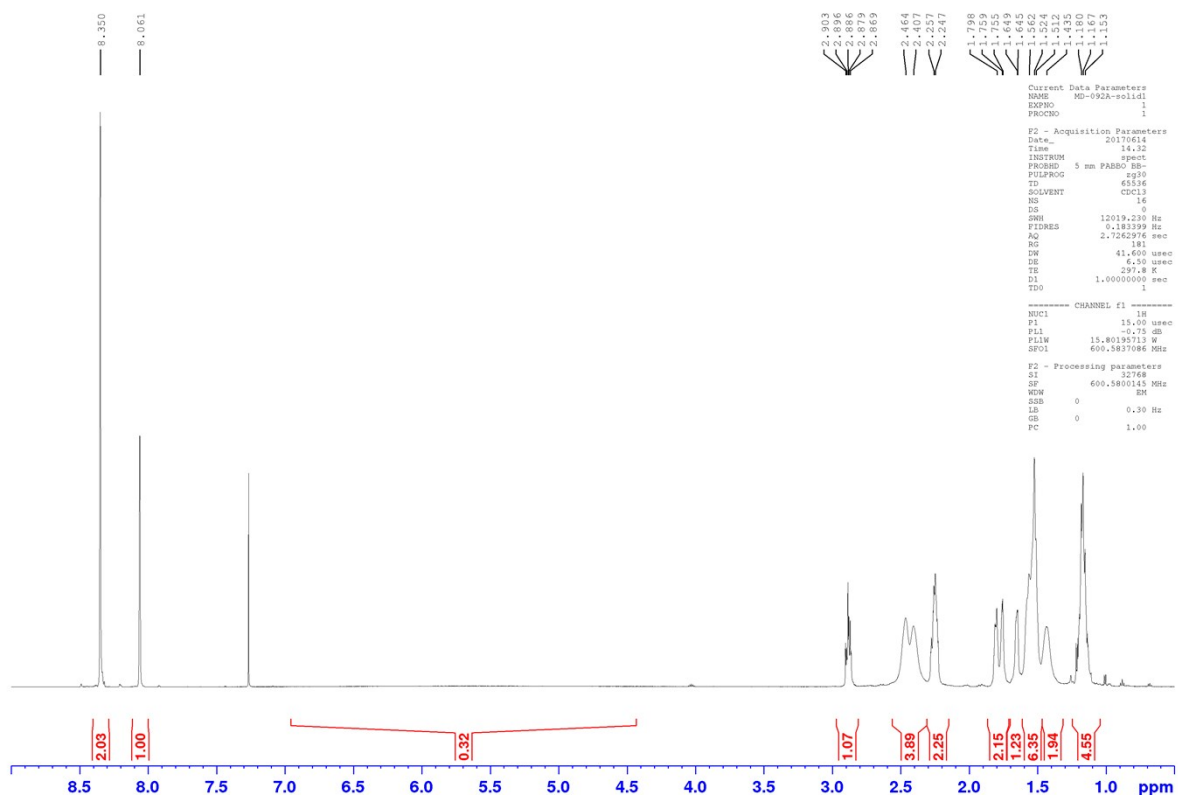

Figure S48. <sup>13</sup>C and <sup>1</sup>H NMR spectra (151 MHz, 600 MHz, CDCl<sub>3</sub>) for catalyst **3a**



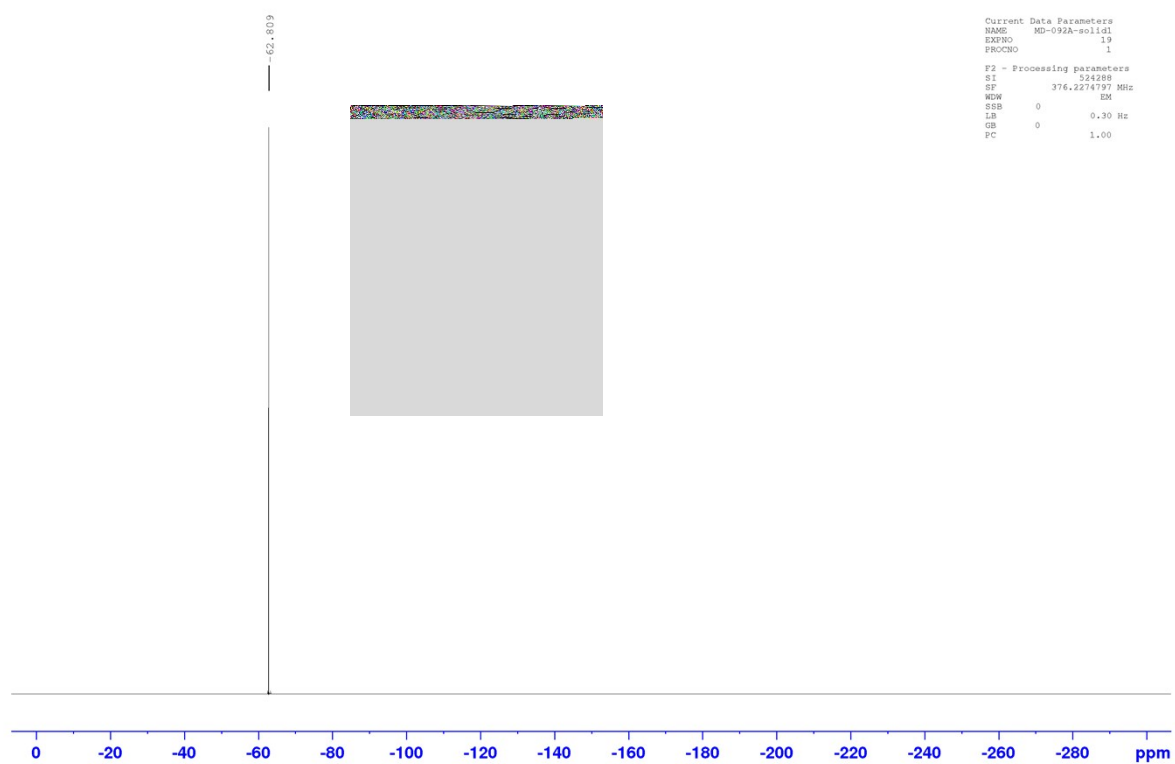

Figure S49.  $^{19}\text{F}$  NMR spectrum (376 MHz,  $\text{CDCl}_3$ ) for catalyst **3a**

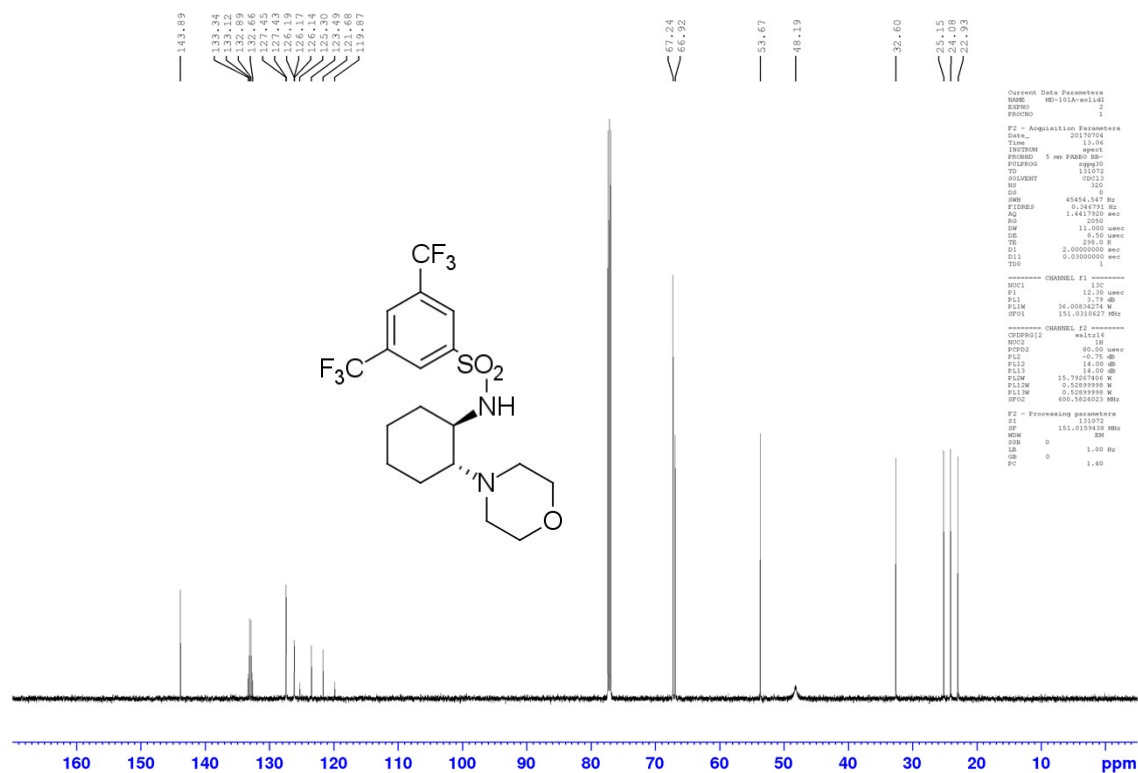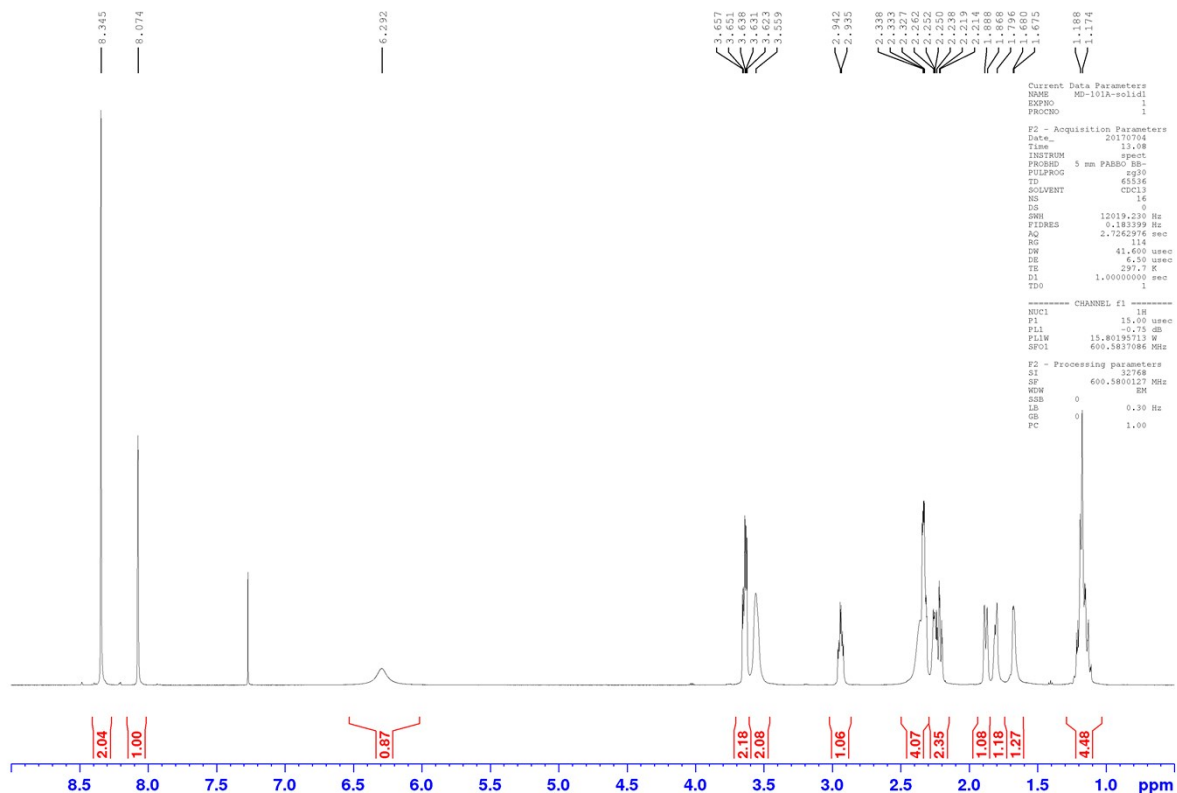

Figure S50. <sup>13</sup>C and <sup>1</sup>H NMR spectra (151 MHz, 600 MHz, CDCl<sub>3</sub>) for catalyst **4a**

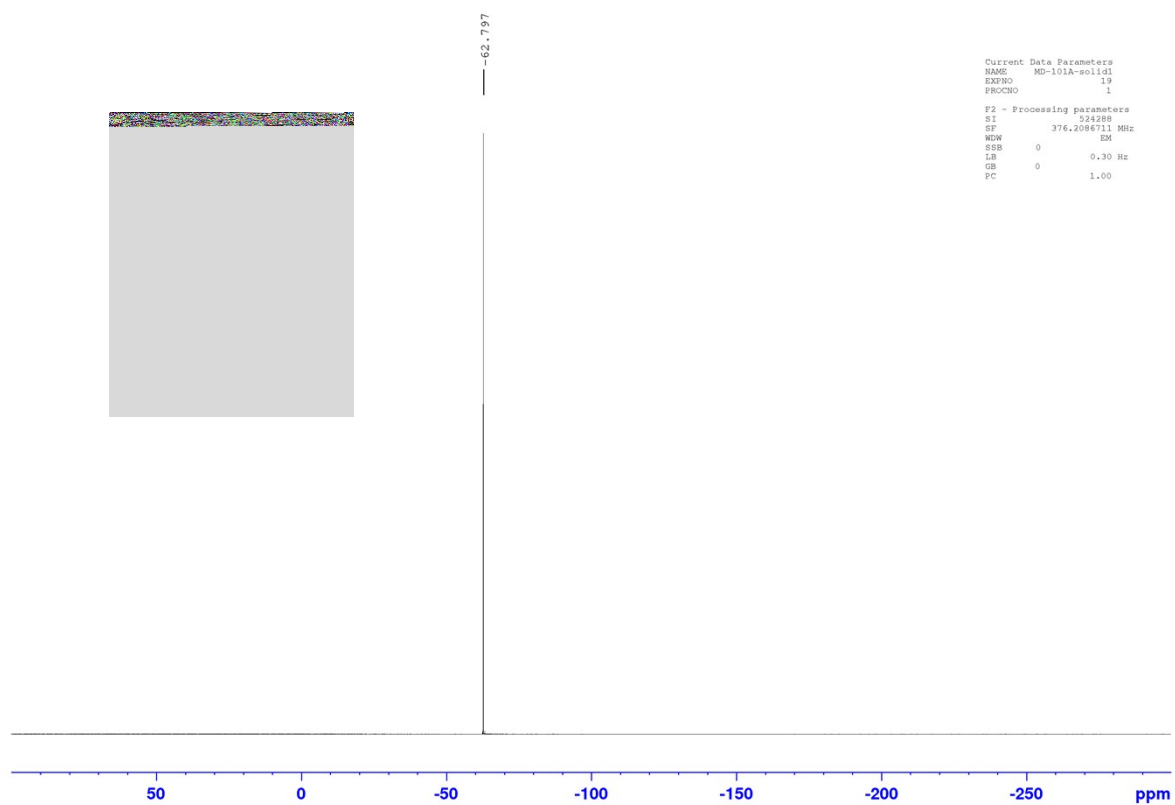

Figure S51.  $^{19}\text{F}$  NMR spectrum (376 MHz,  $\text{CDCl}_3$ ) for catalyst **4a**

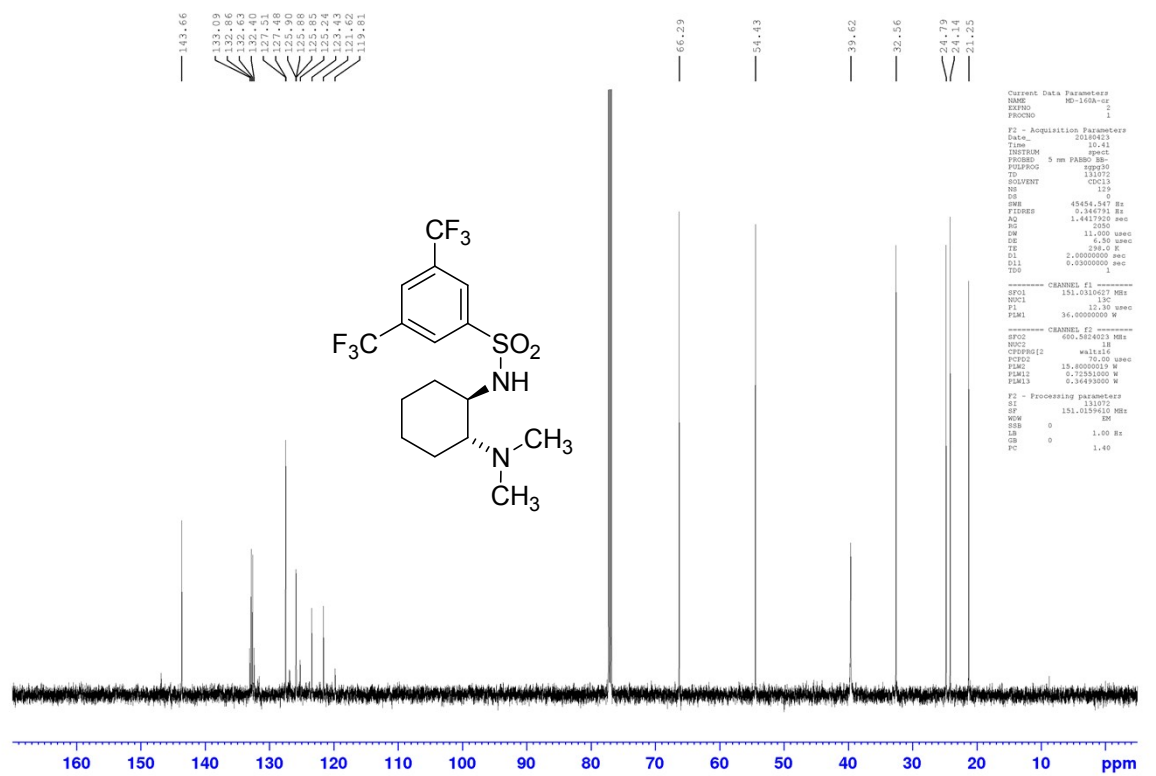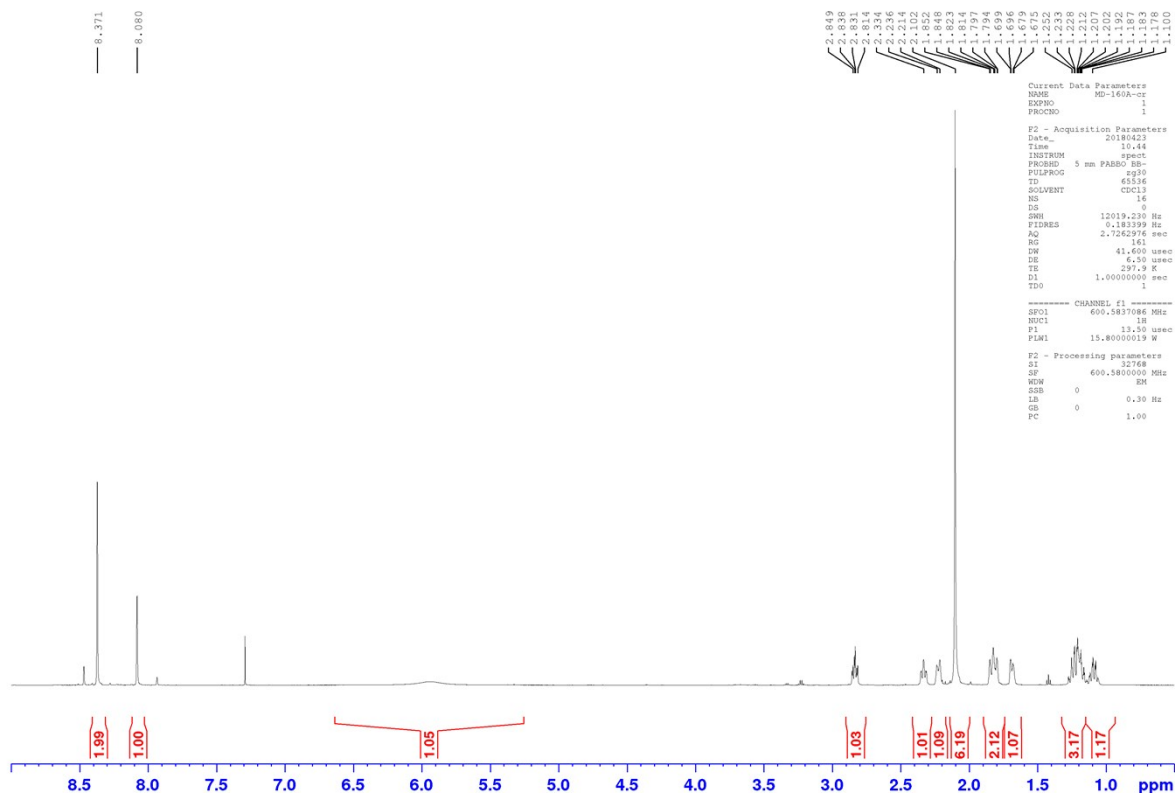

Figure S52.  $^{13}\text{C}$  and  $^1\text{H}$  NMR spectra (151 MHz, 600 MHz,  $\text{CDCl}_3$ ) for catalyst **5a**

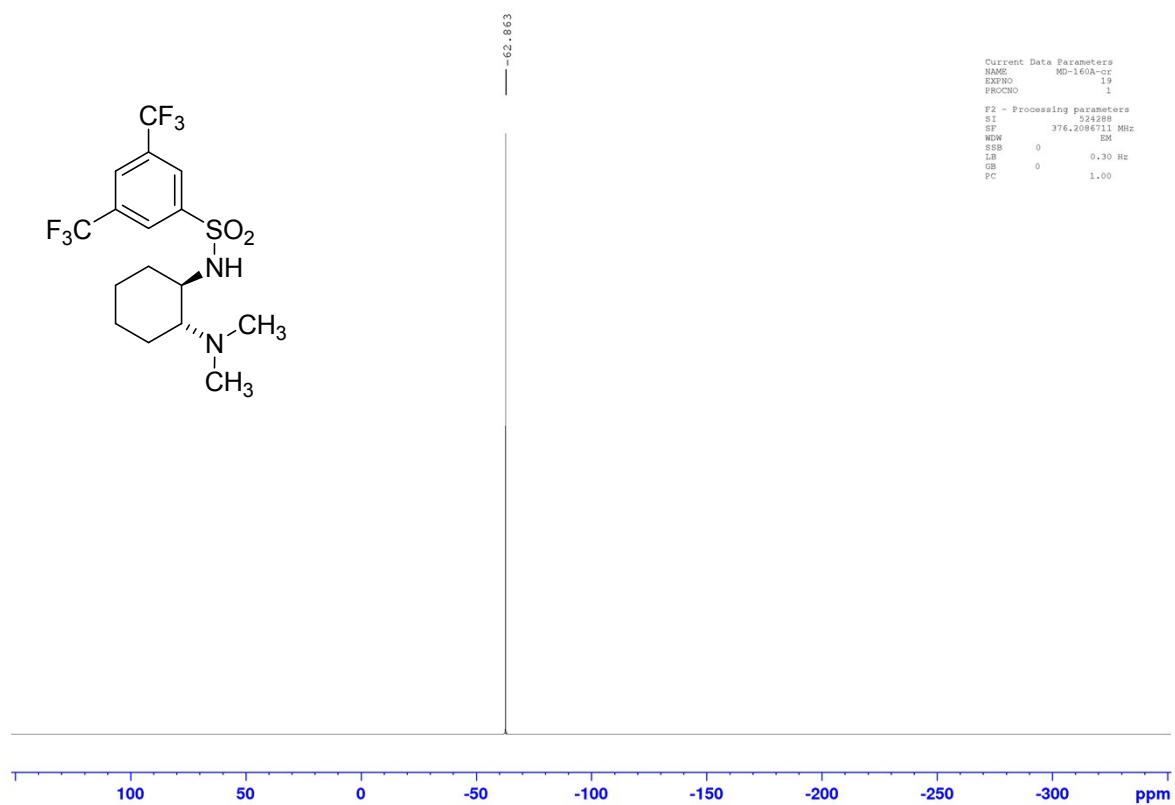

Figure S53.  $^{19}\text{F}$  NMR spectrum (376 MHz,  $\text{CDCl}_3$ ) for catalyst **5a**

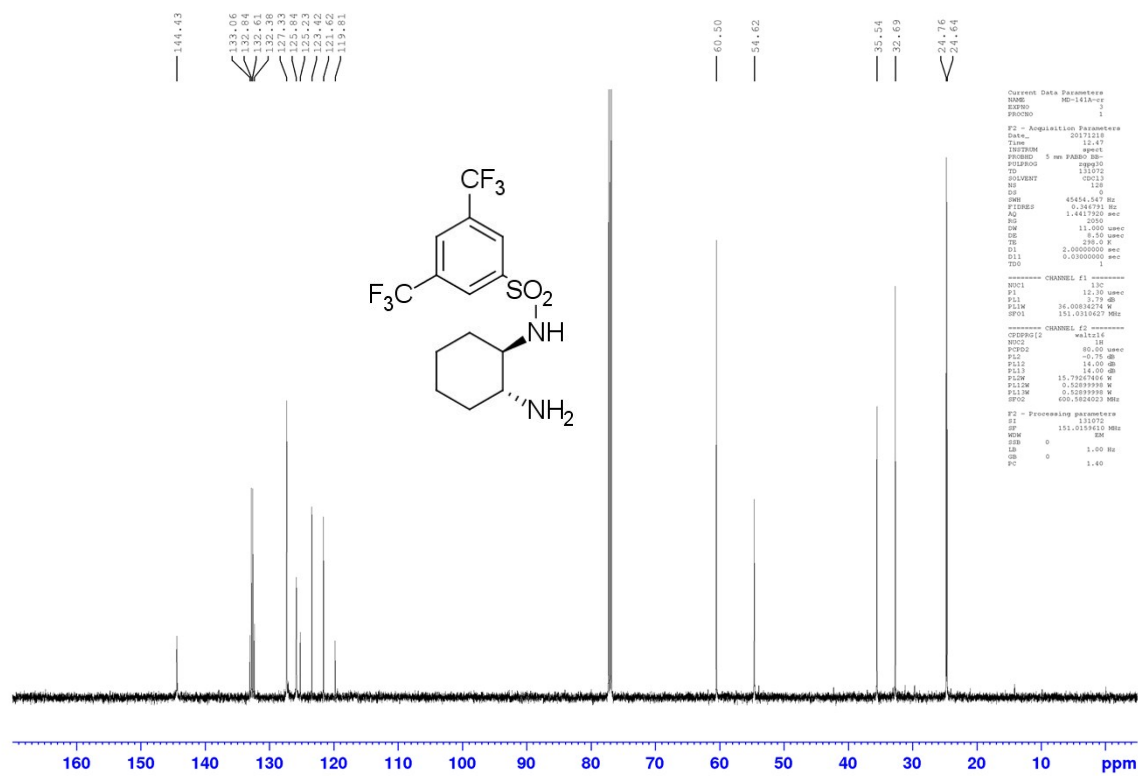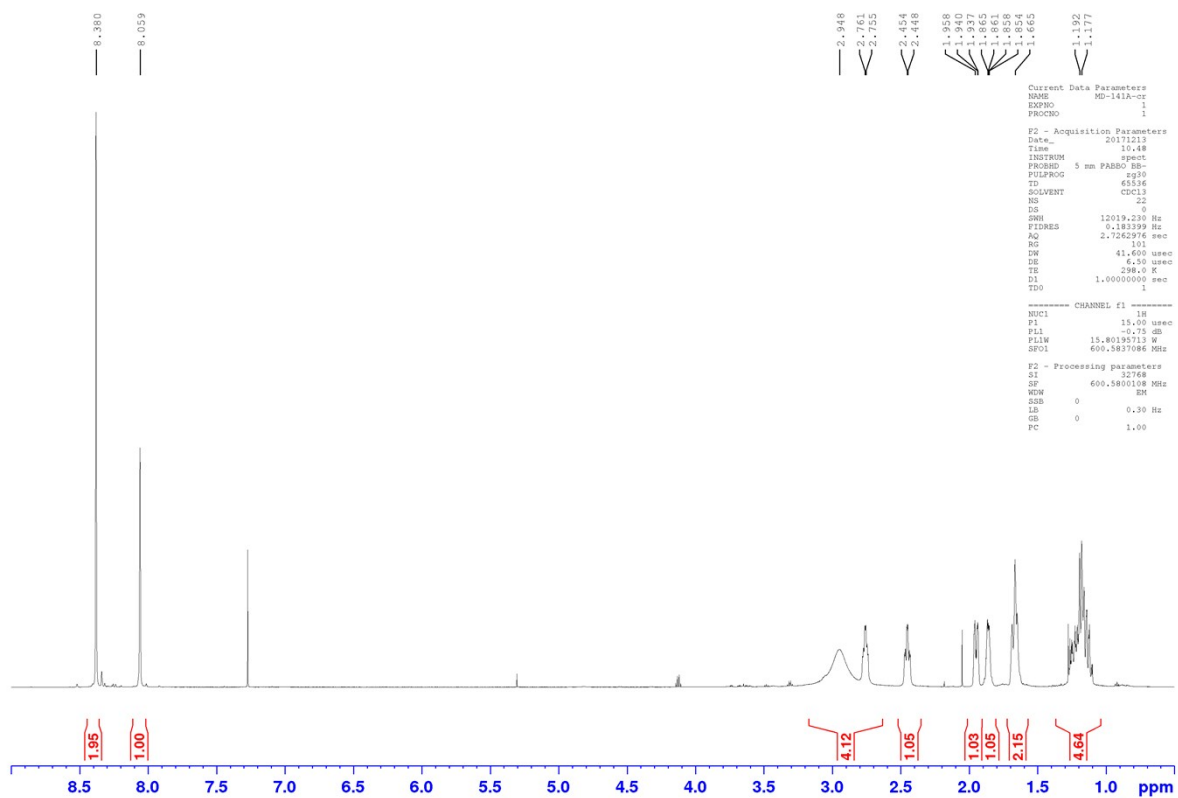

Figure S54. <sup>13</sup>C and <sup>1</sup>H NMR spectra (151 MHz, 600 MHz, CDCl<sub>3</sub>) for catalyst **6a**

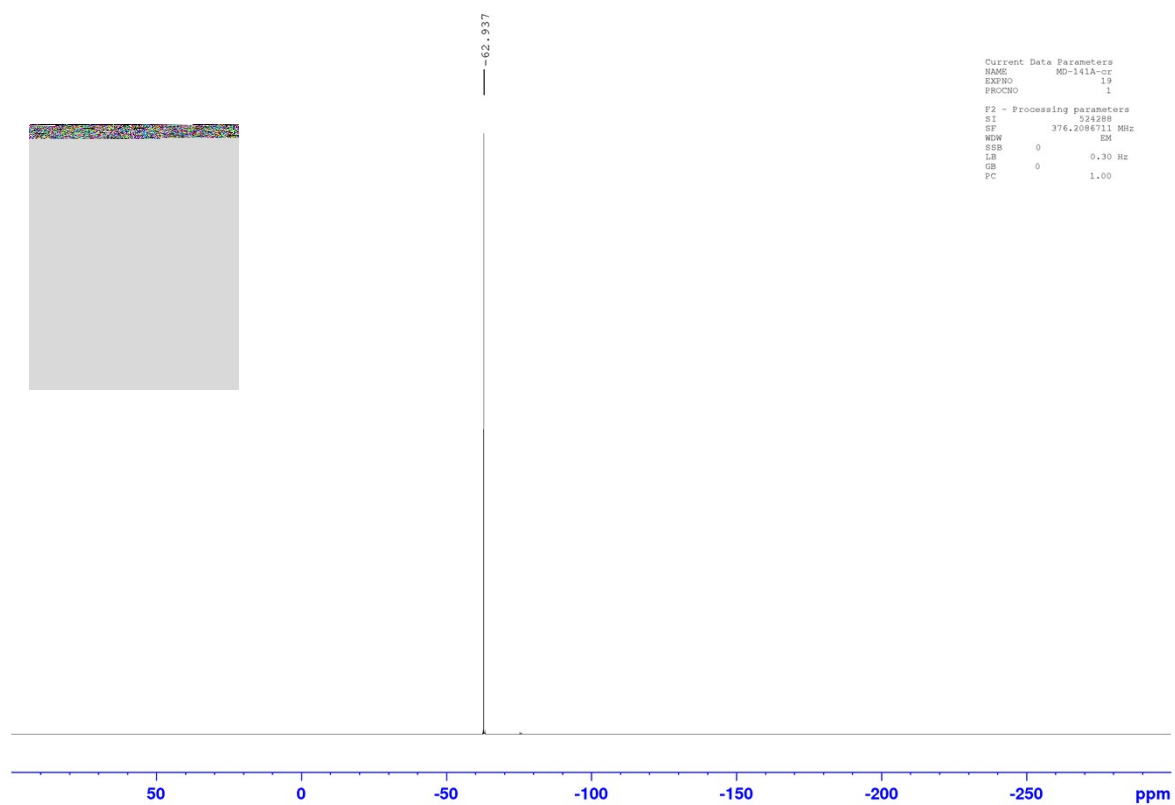

Figure S55.  $^{19}\text{F}$  NMR spectrum (376 MHz,  $\text{CDCl}_3$ ) for catalyst **6a**

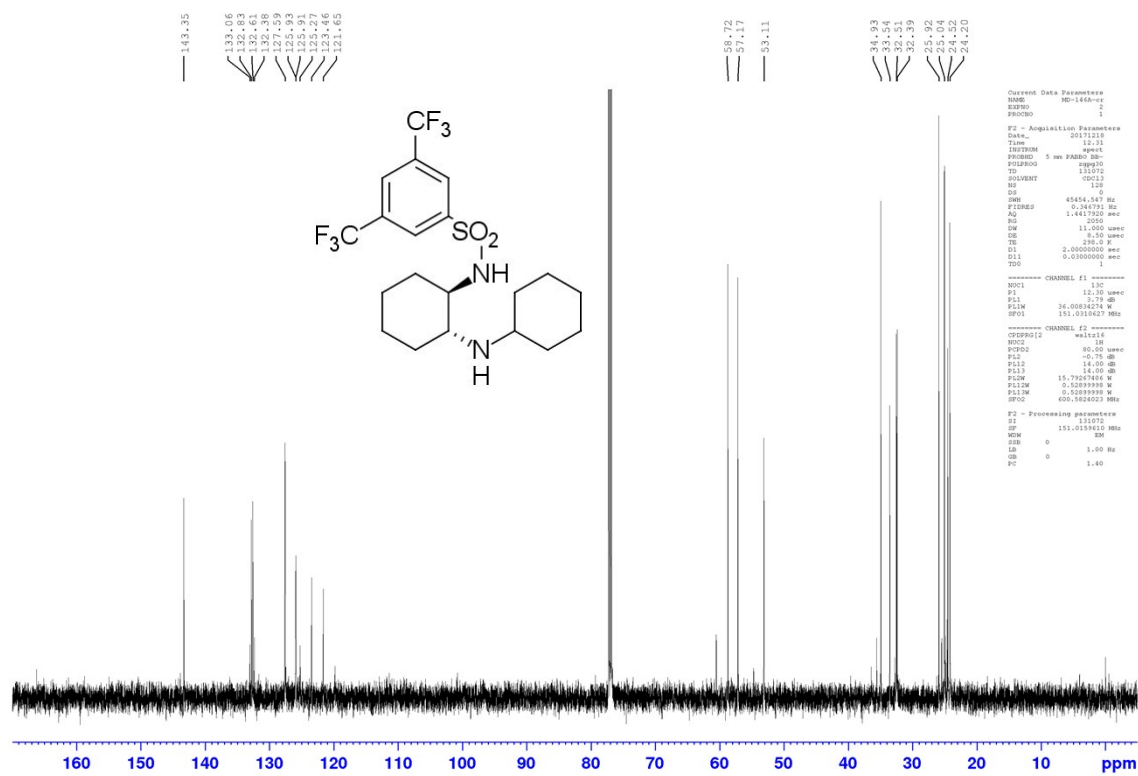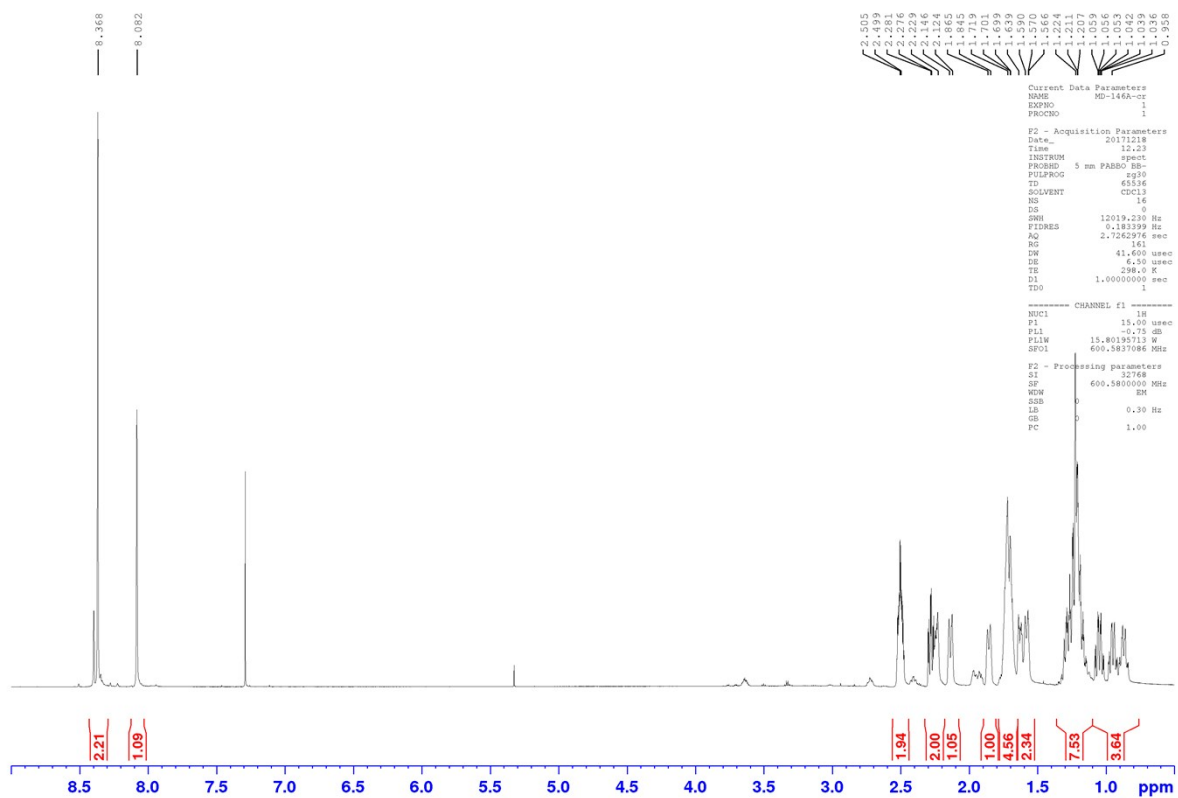

Figure S56. <sup>13</sup>C and <sup>1</sup>H NMR spectra (151 MHz, 600 MHz, CDCl<sub>3</sub>) for catalyst 7a



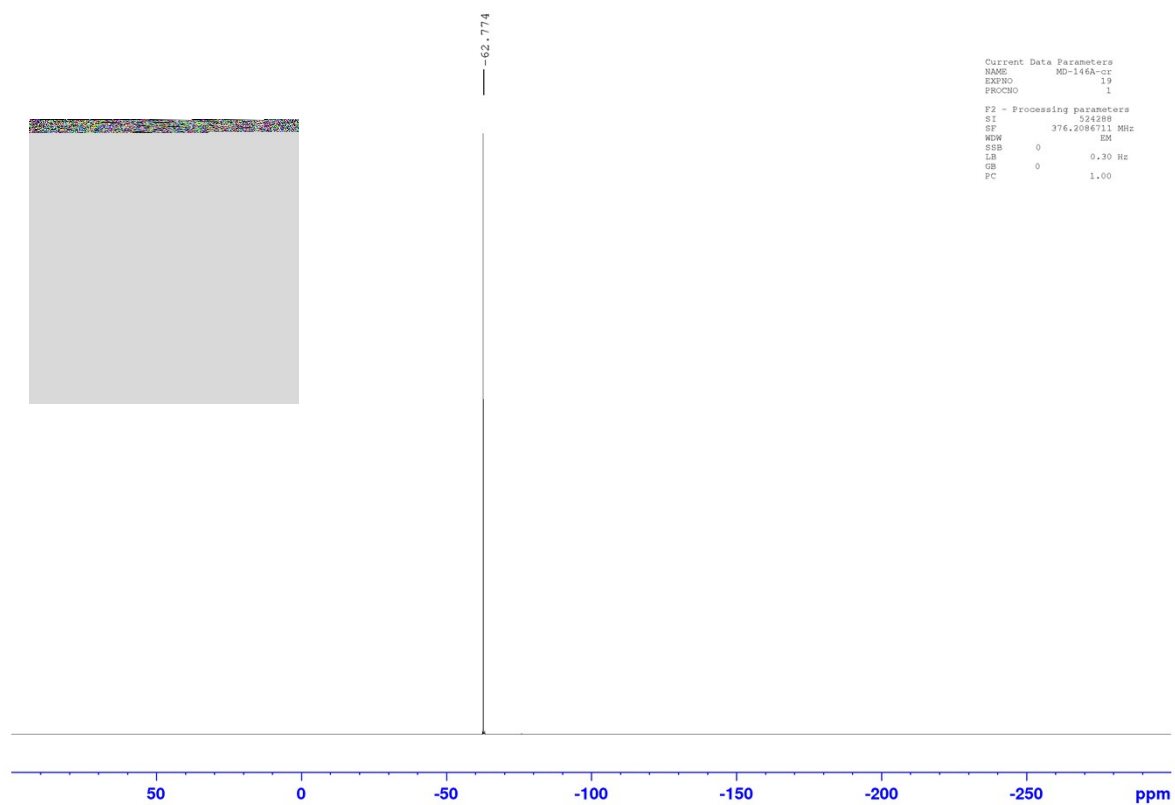

Figure S57.  $^{19}\text{F}$  NMR spectrum (376 MHz,  $\text{CDCl}_3$ ) for catalyst **7a**

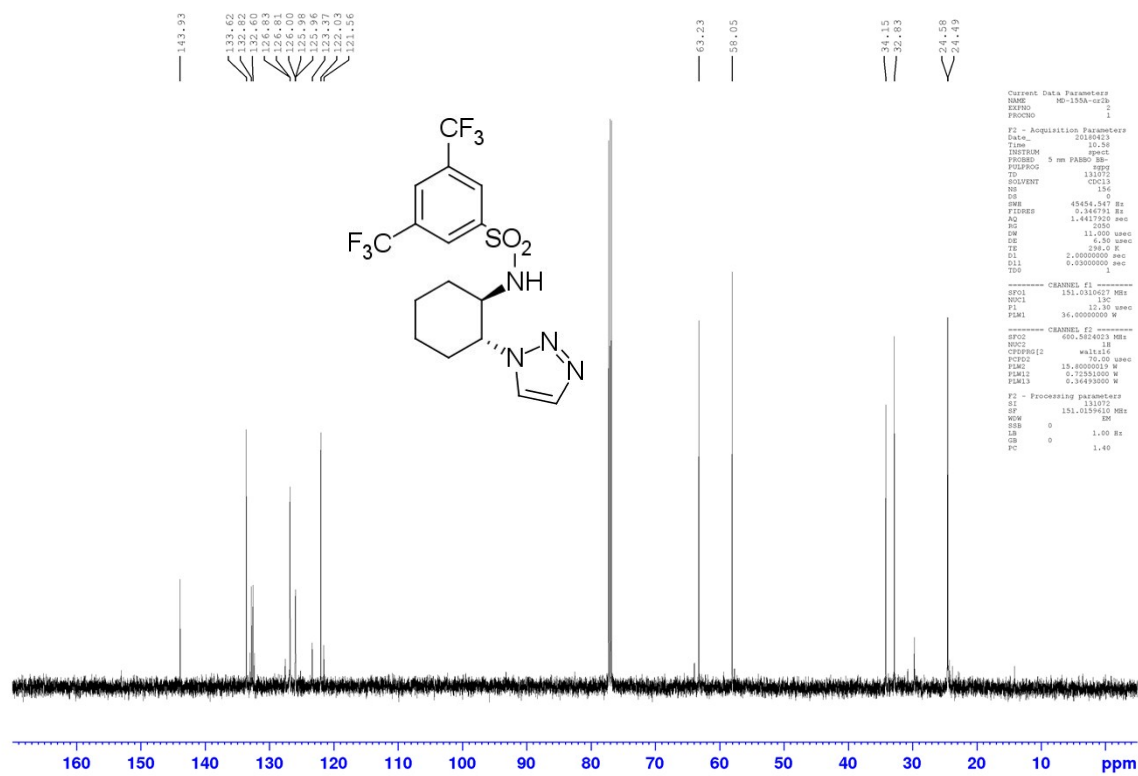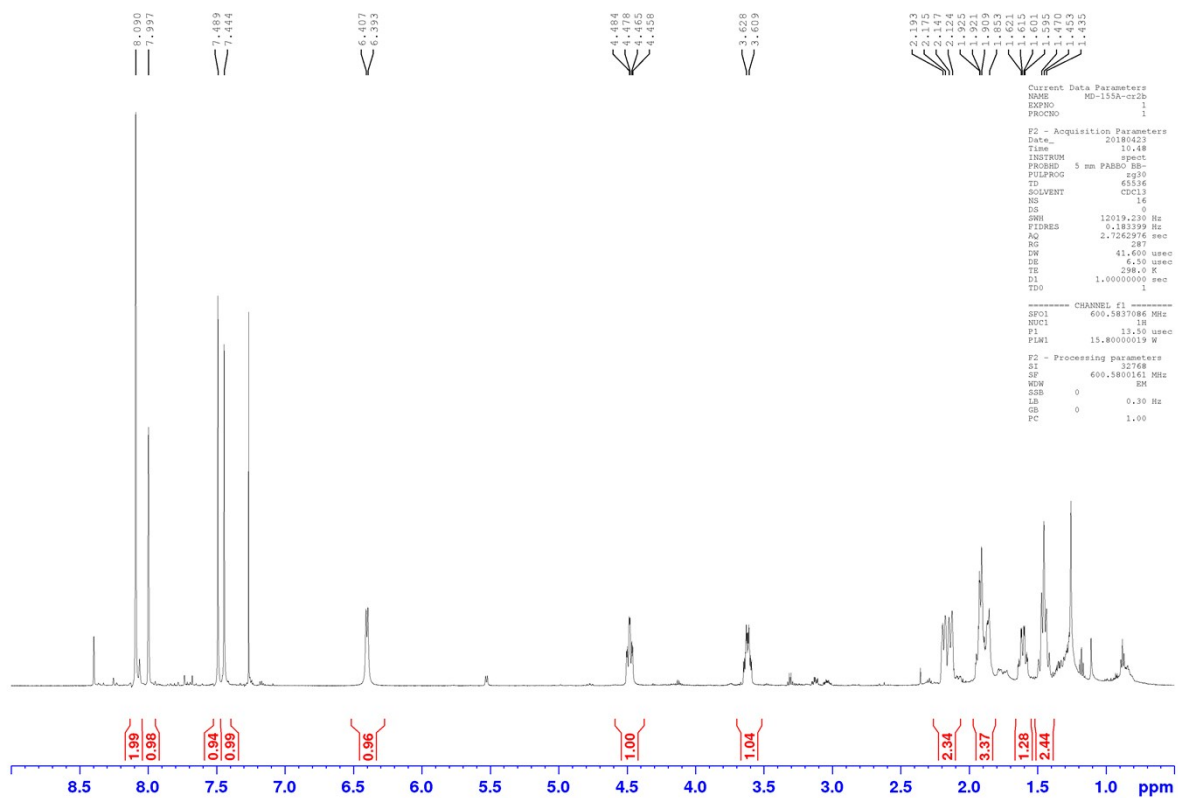

Figure S58. <sup>13</sup>C and <sup>1</sup>H NMR spectra (151 MHz, 600 MHz, CDCl<sub>3</sub>) for catalyst **8a**

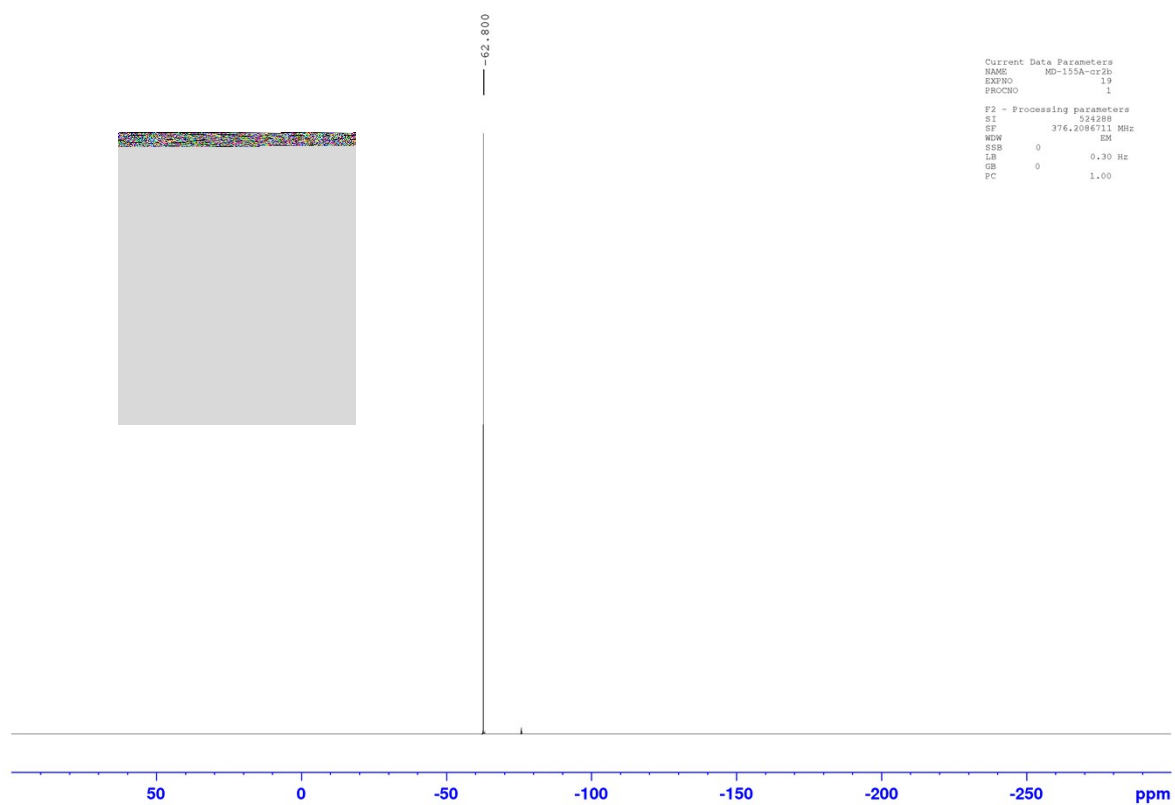

Figure S59.  $^{19}\text{F}$  NMR spectrum (376 MHz,  $\text{CDCl}_3$ ) for catalyst **8a**

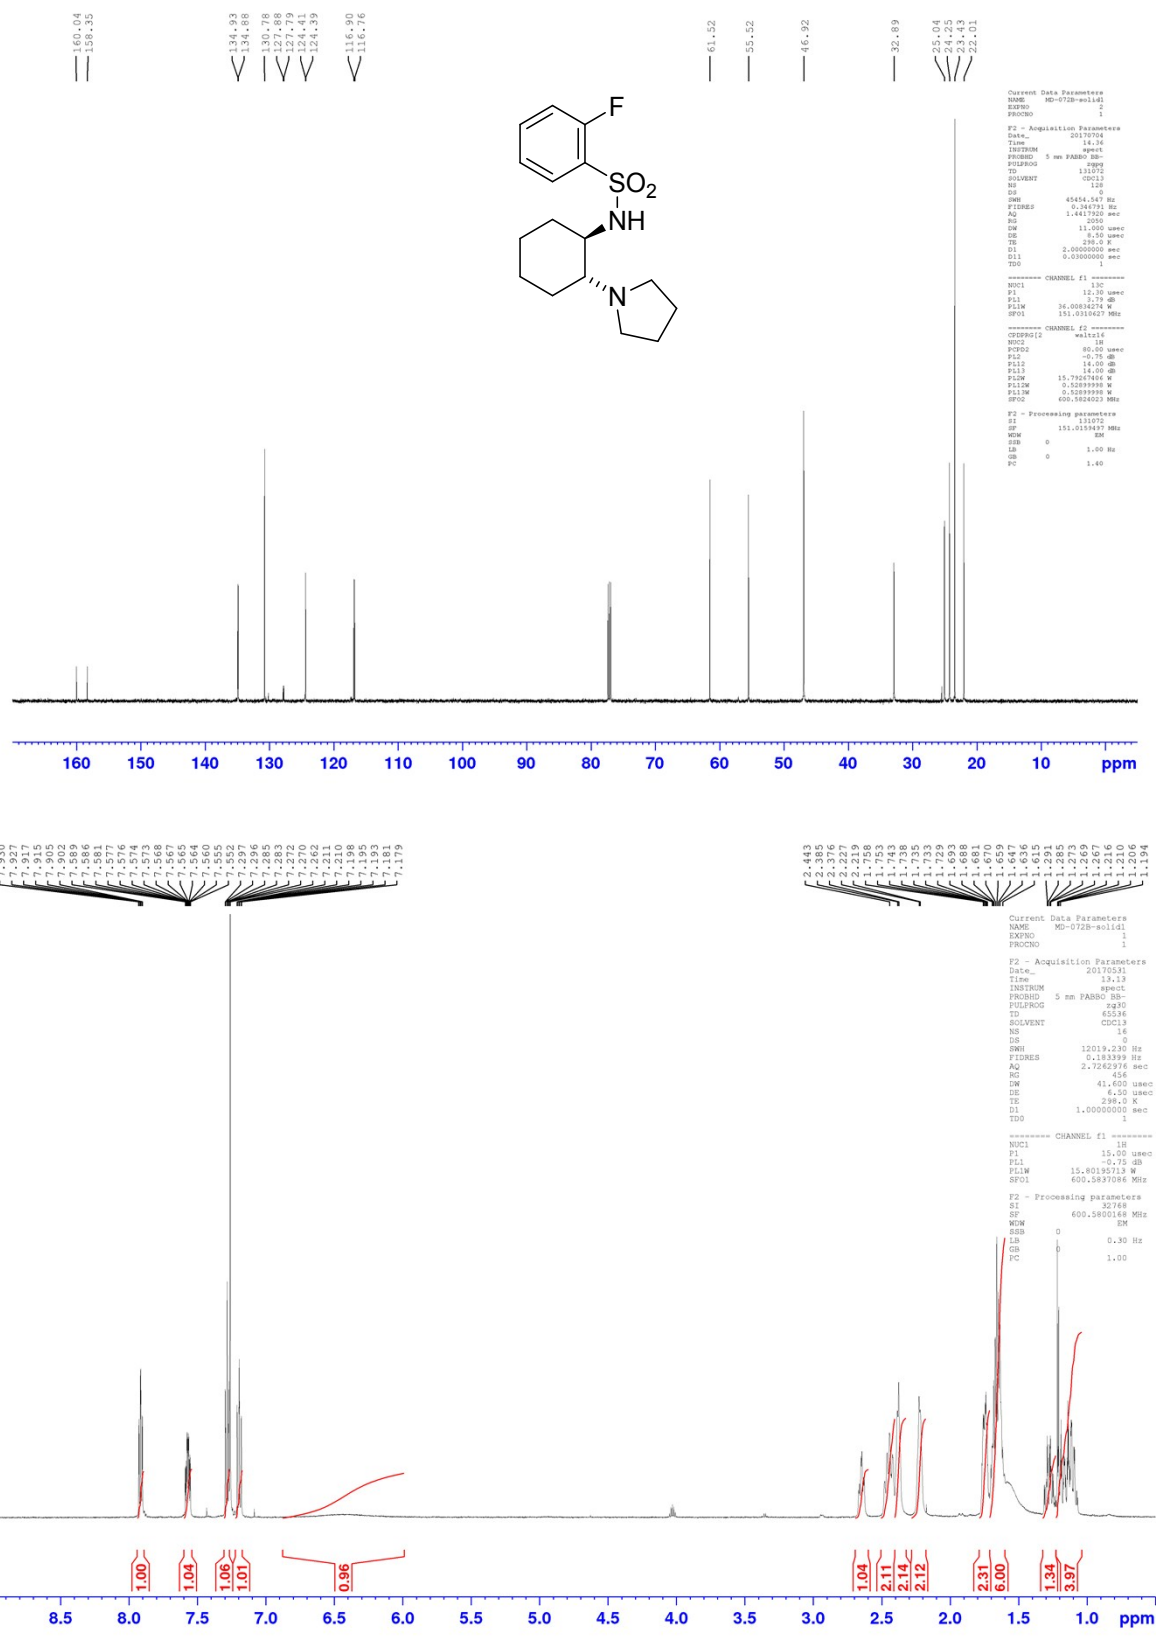

Figure S60. <sup>13</sup>C and <sup>1</sup>H NMR spectra (151 MHz, 600 MHz, CDCl<sub>3</sub>) for catalyst **1m**

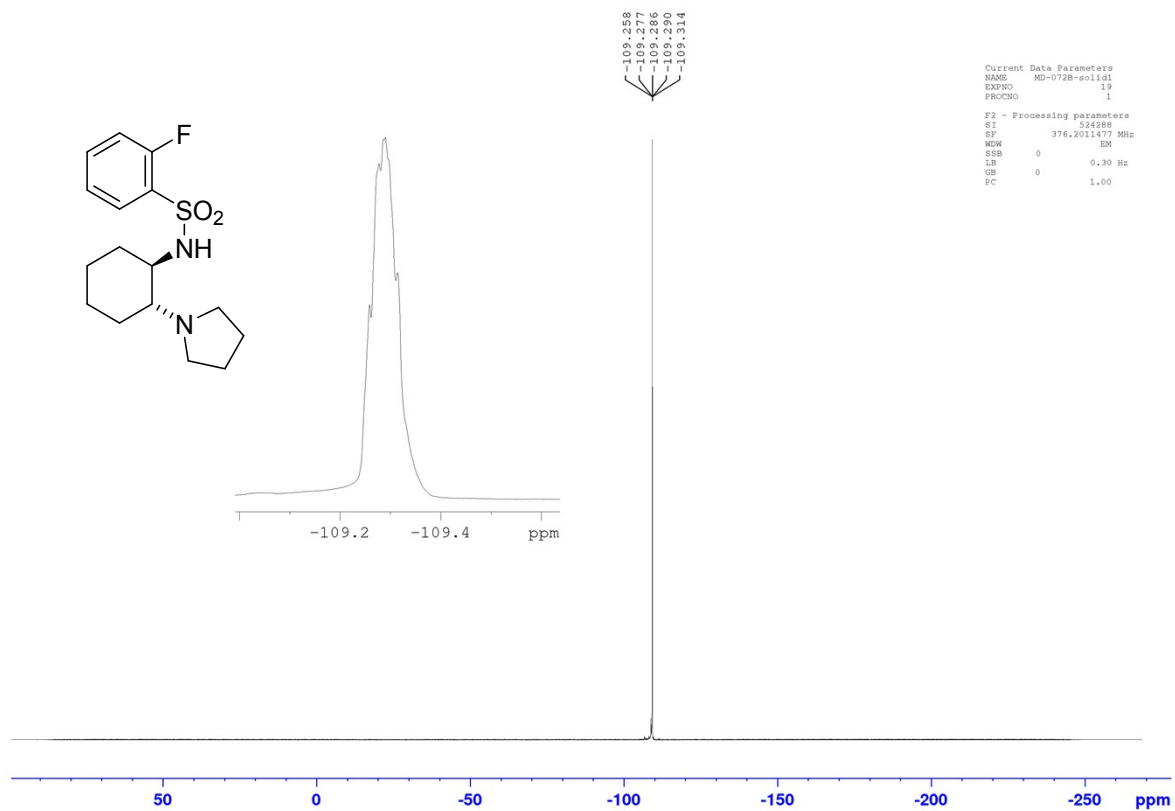

Figure S61.  $^{19}\text{F}$  NMR spectrum (376 MHz,  $\text{CDCl}_3$ ) for catalyst **1m**

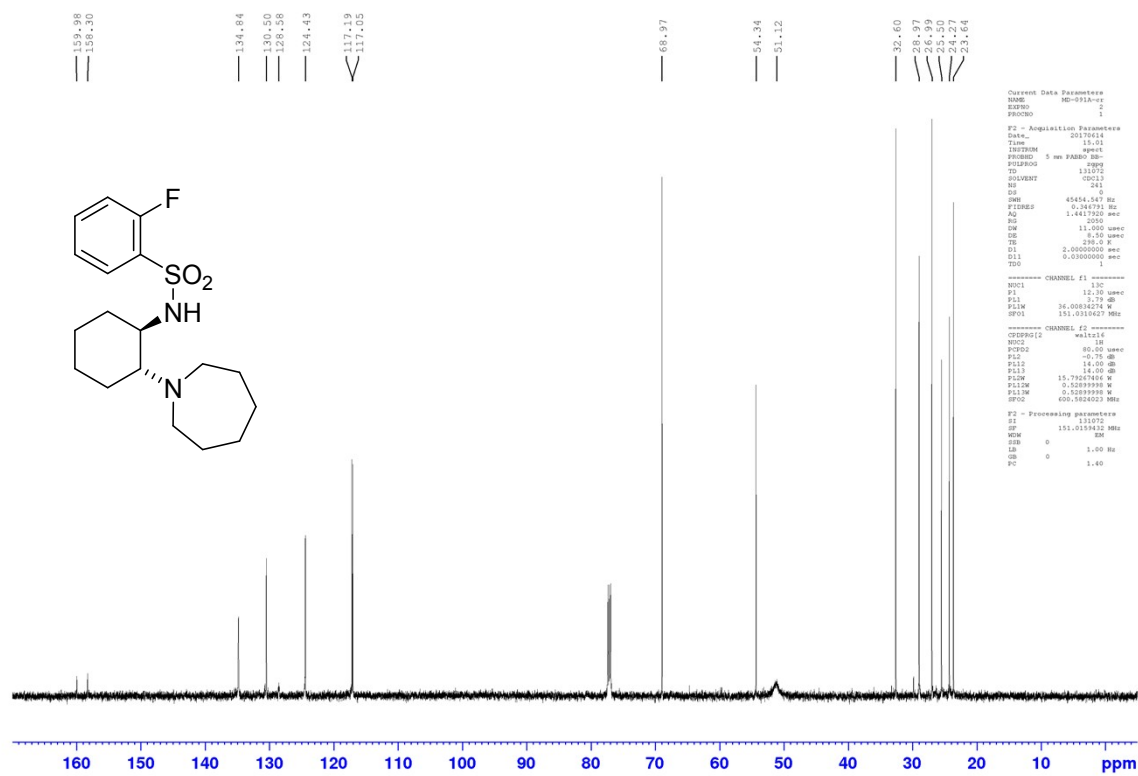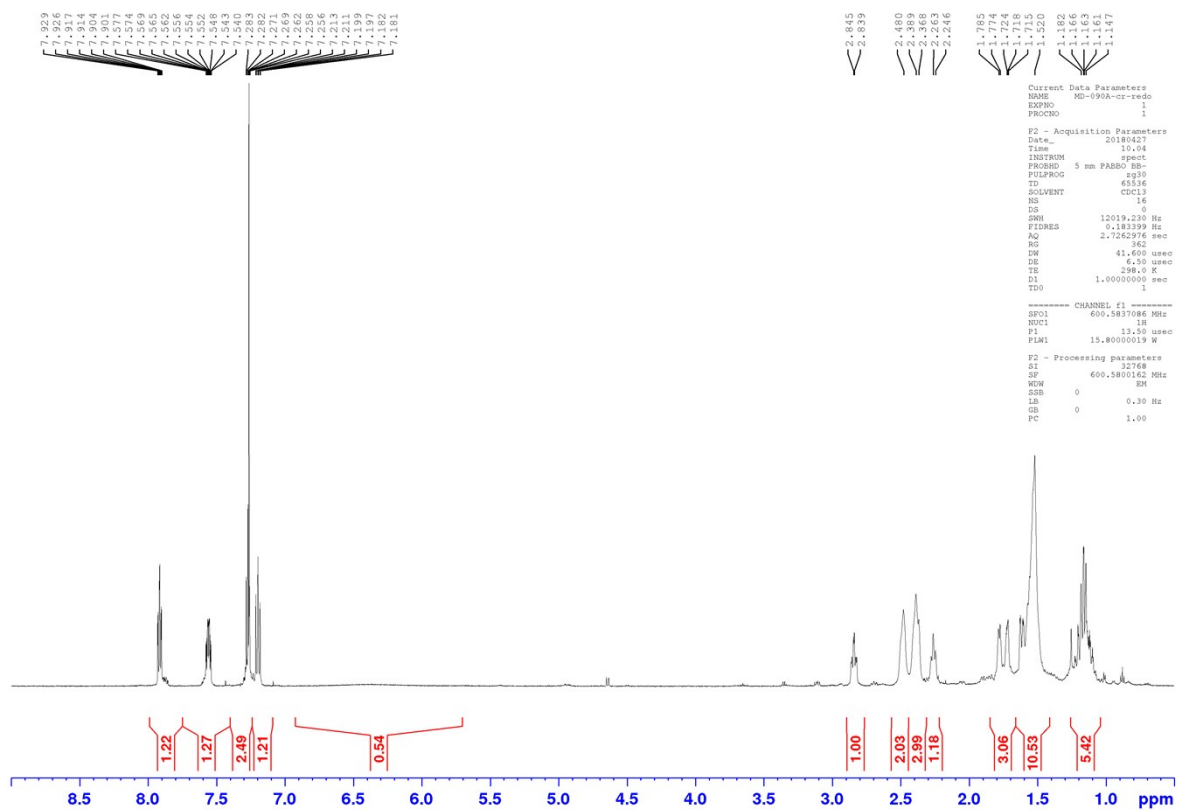

Figure S62. <sup>13</sup>C and <sup>1</sup>H NMR spectra (151 MHz, 600 MHz, CDCl<sub>3</sub>) for catalyst **3m**

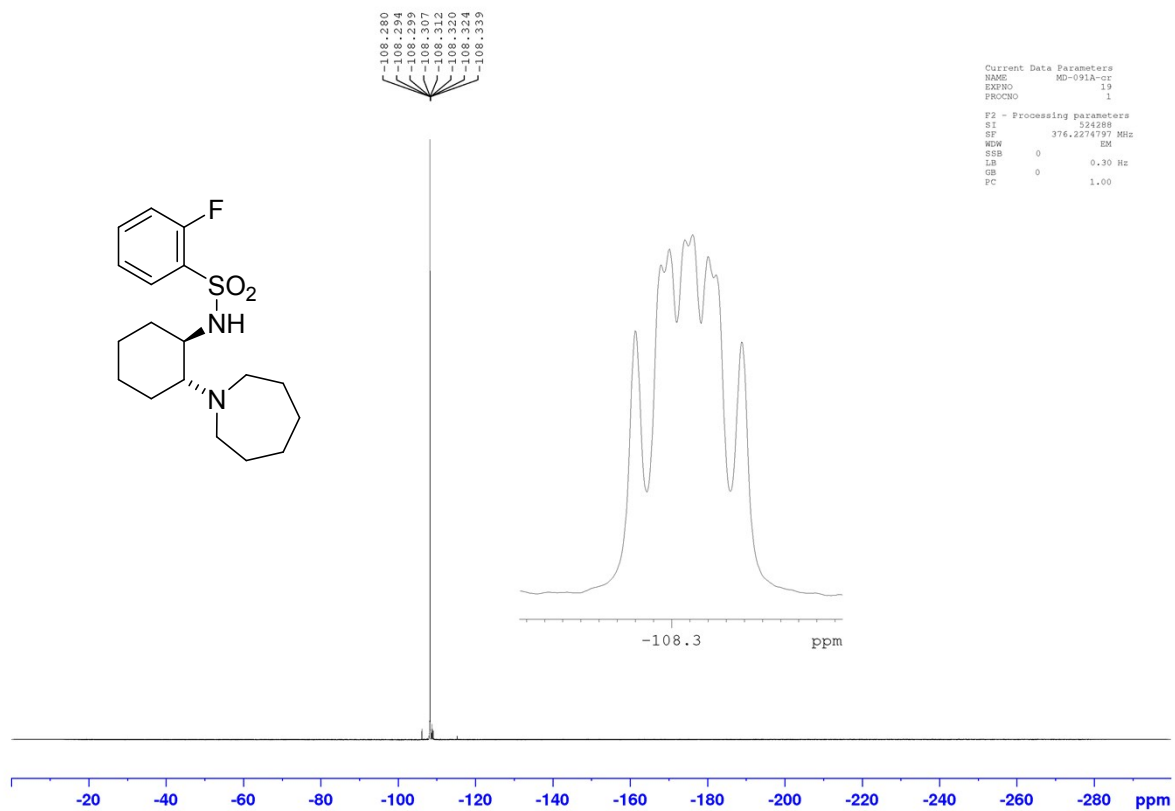

Figure S63.  $^{19}\text{F}$  NMR spectrum (376 MHz,  $\text{CDCl}_3$ ) for catalyst **3m**

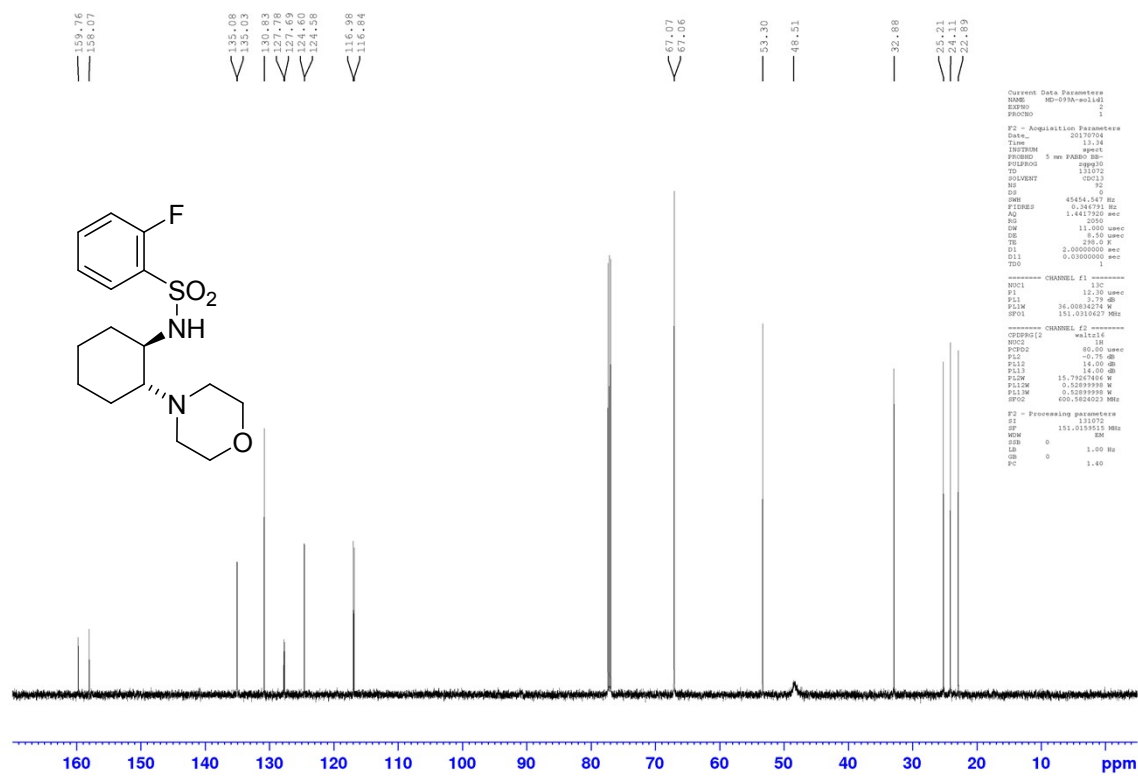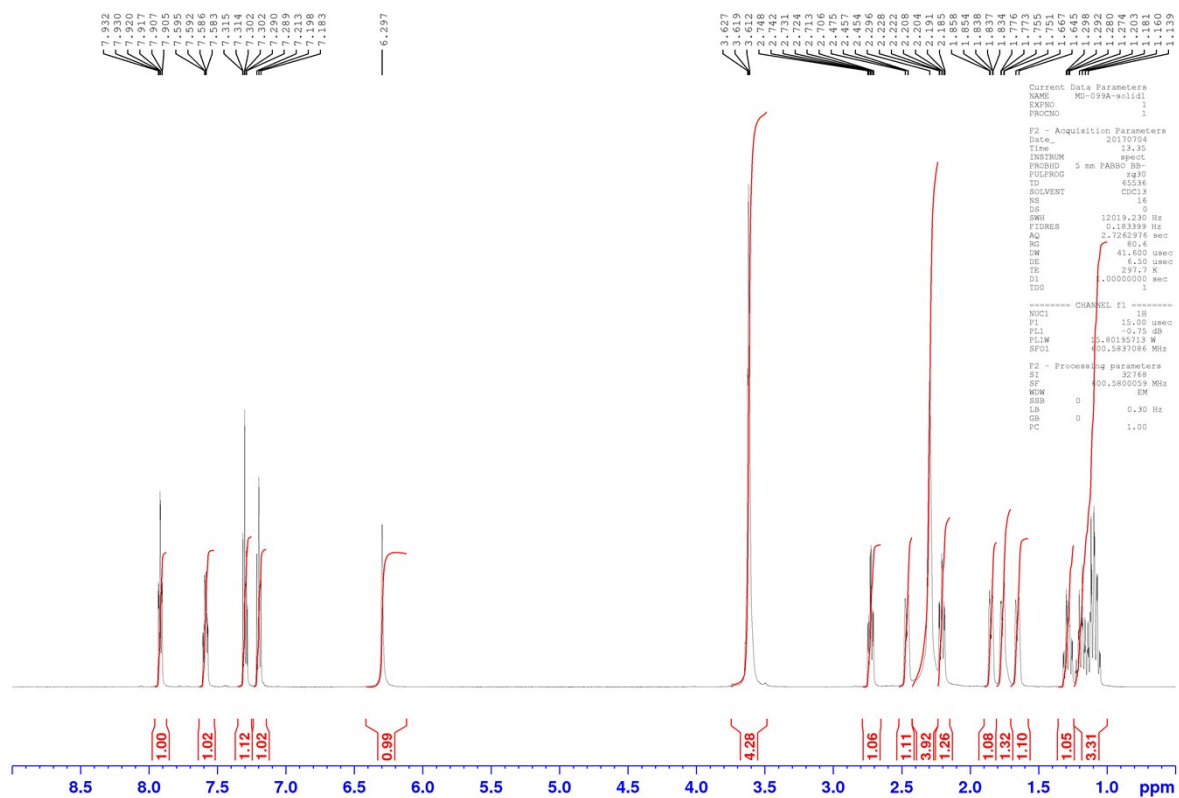

Figure S64. <sup>13</sup>C and <sup>1</sup>H NMR spectra (151 MHz, 600 MHz, CDCl<sub>3</sub>) for catalyst **4m**



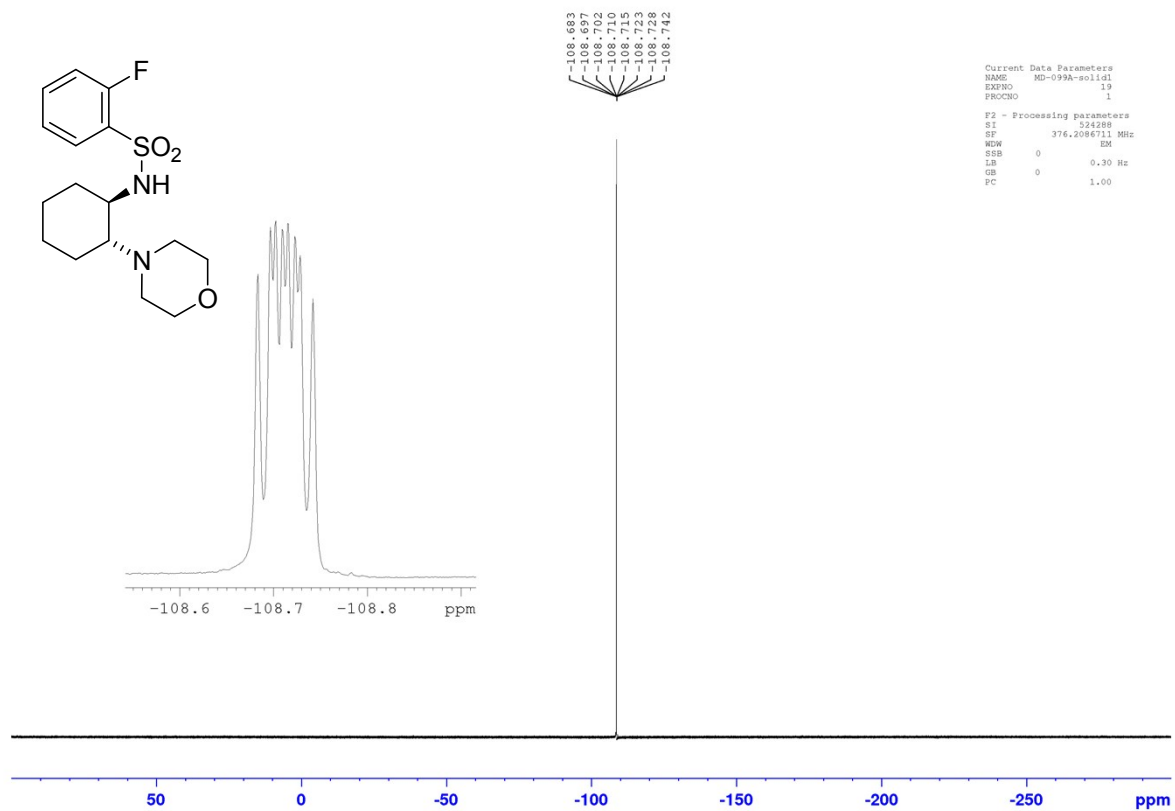

Figure S65. <sup>19</sup>F NMR spectrum (376 MHz, CDCl<sub>3</sub>) for catalyst **4m**

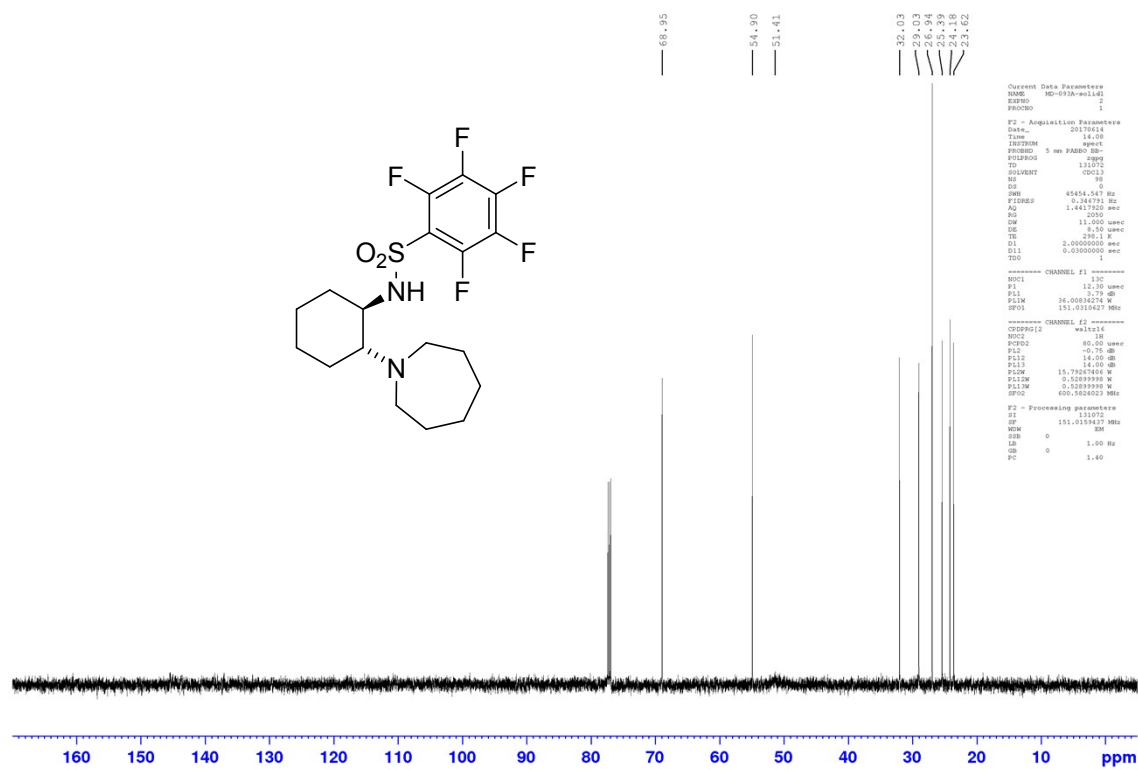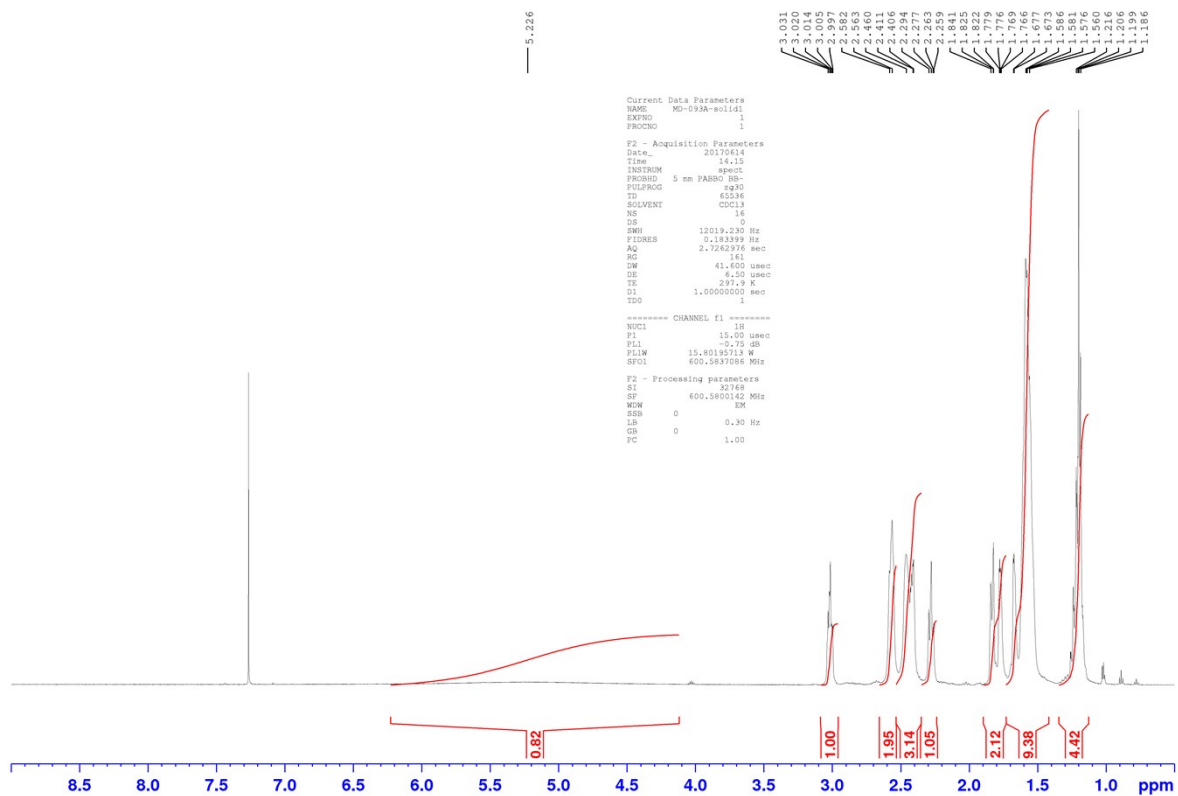

Figure S66.  $^{13}\text{C}$  and  $^1\text{H}$  NMR spectra (151 MHz, 600 MHz,  $\text{CDCl}_3$ ) for catalyst **3p**

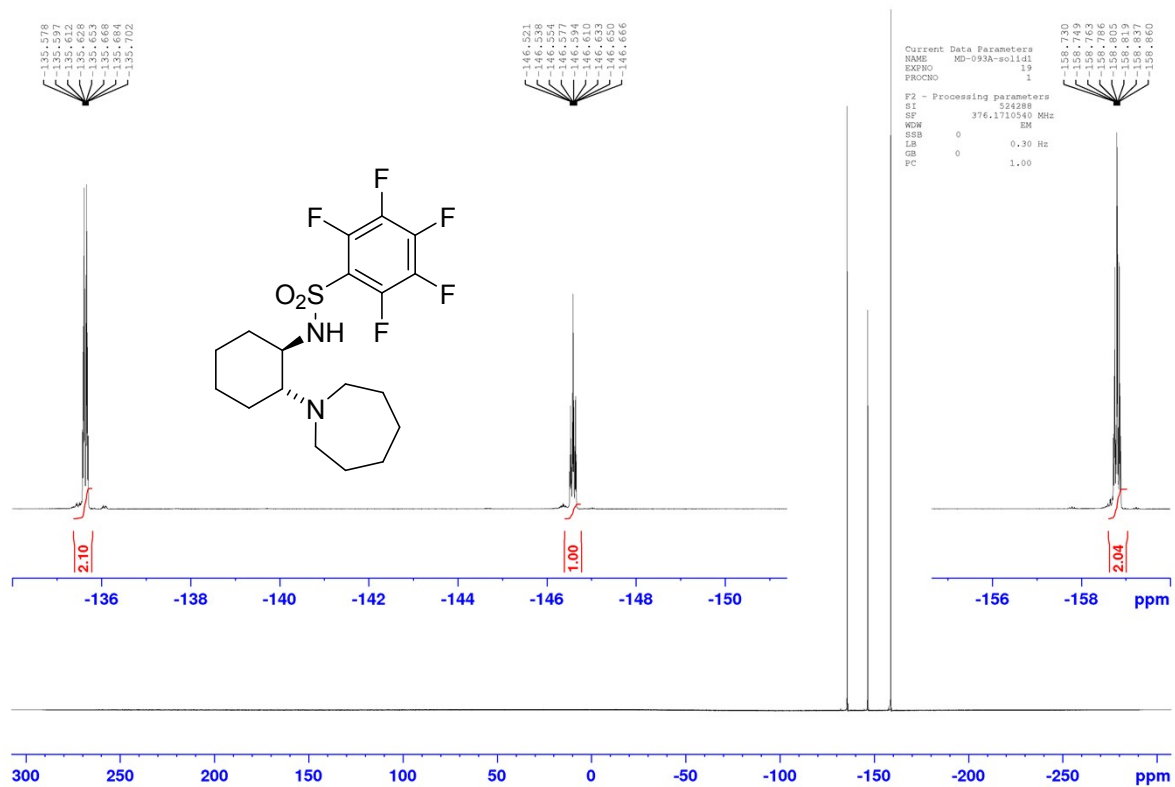

Figure S67.  $^{19}\text{F}$  NMR spectrum (376 MHz,  $\text{CDCl}_3$ ) for catalyst **3p**

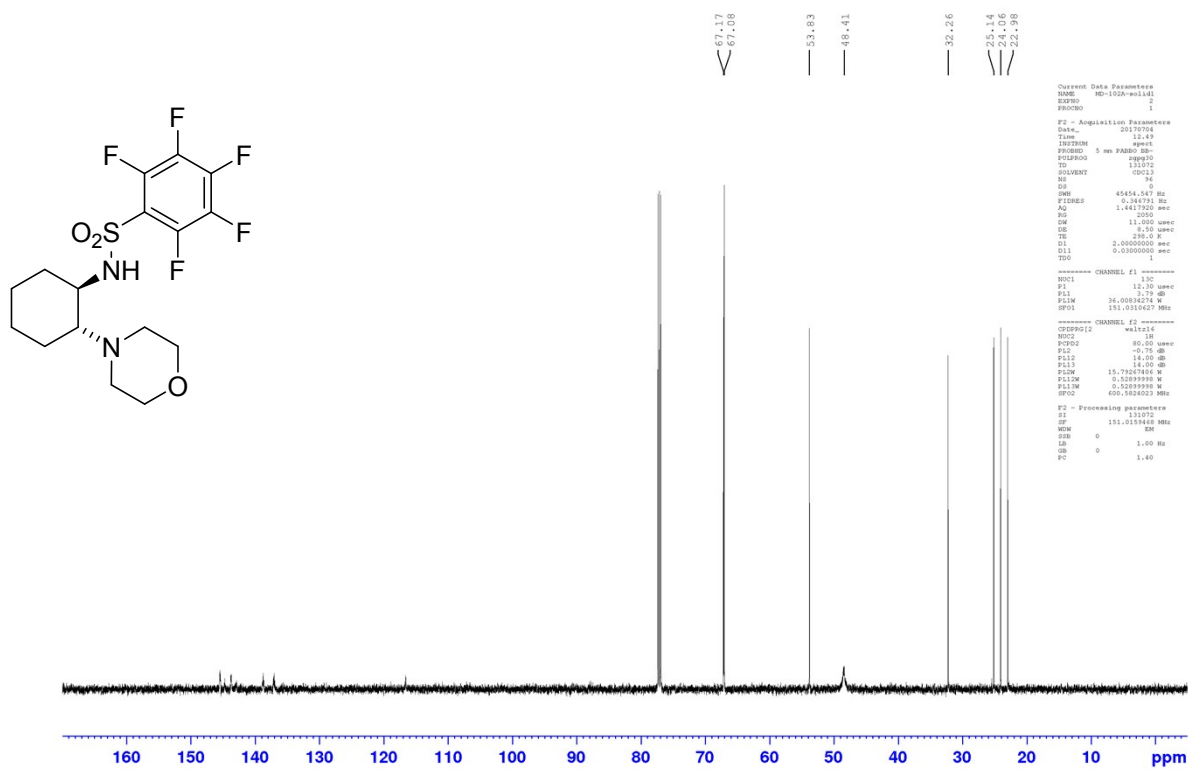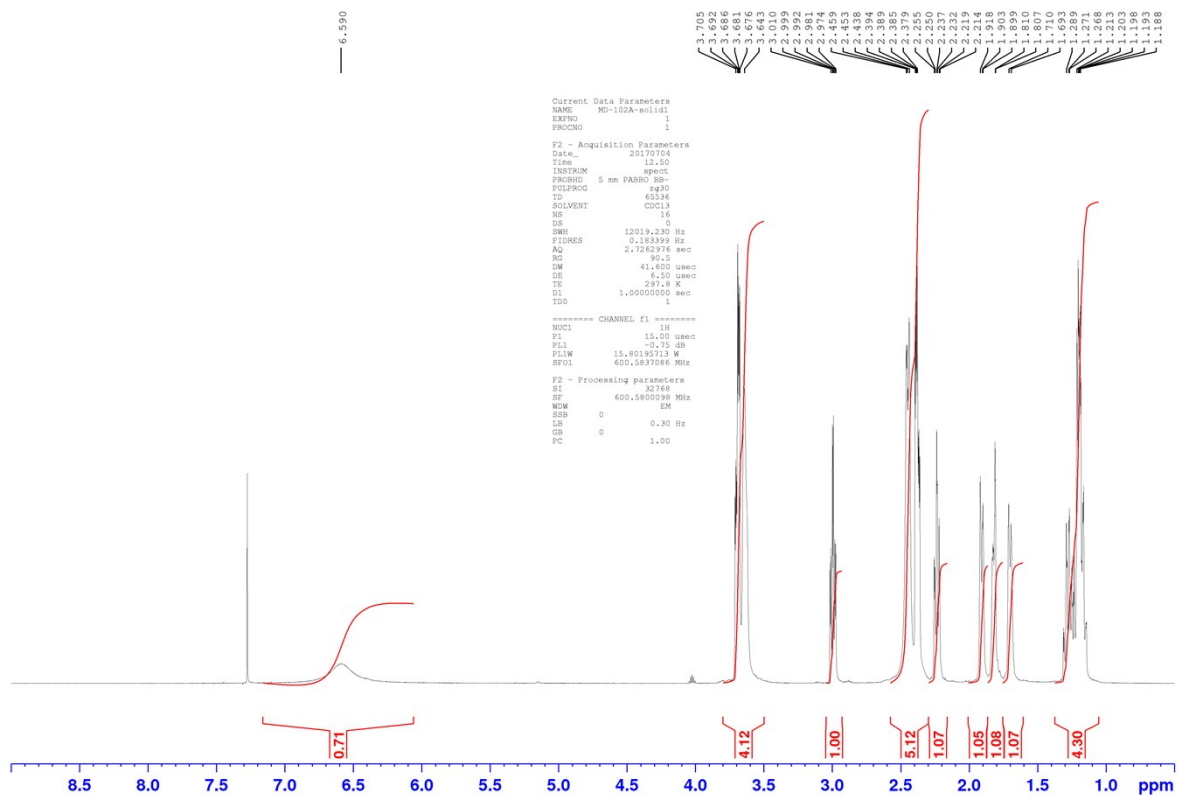

Figure S68.  $^{13}\text{C}$  and  $^1\text{H}$  NMR spectra (151 MHz, 600 MHz,  $\text{CDCl}_3$ ) for catalyst **4p**

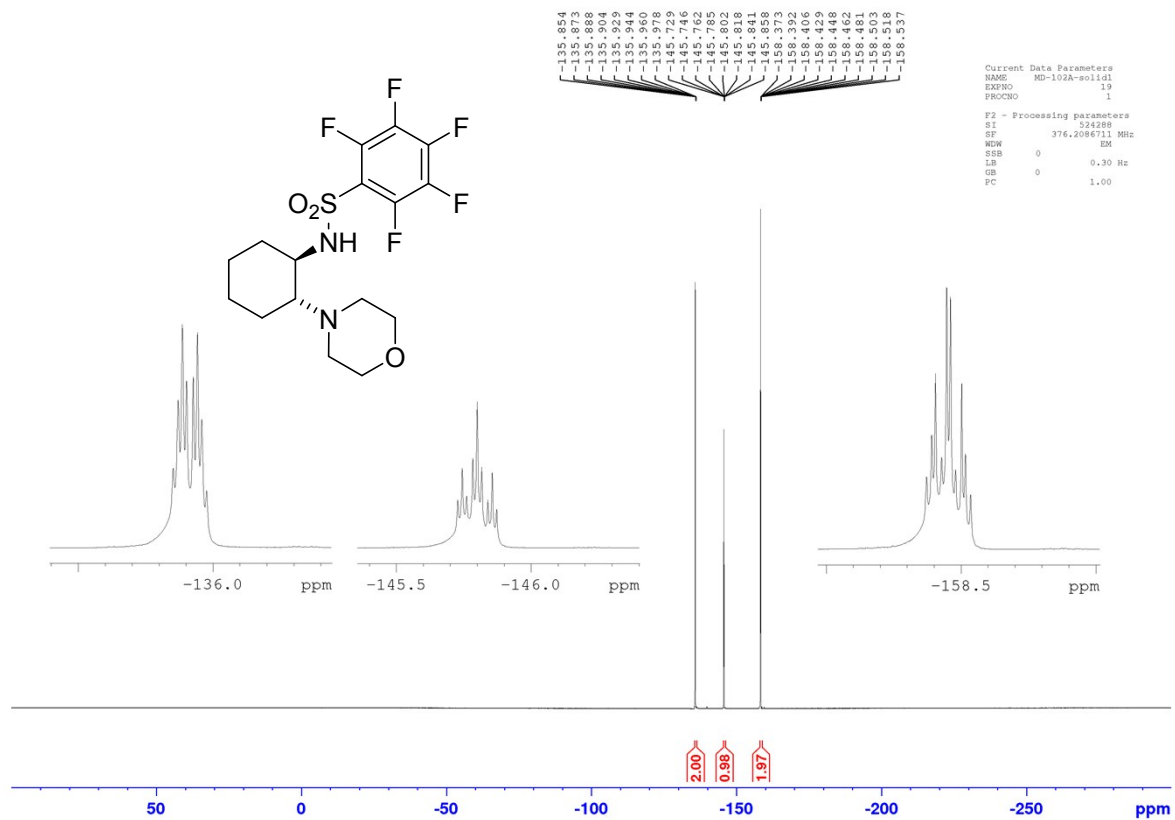

Figure S69.  $^{19}\text{F}$  NMR spectrum (376 MHz,  $\text{CDCl}_3$ ) for catalyst **4b**

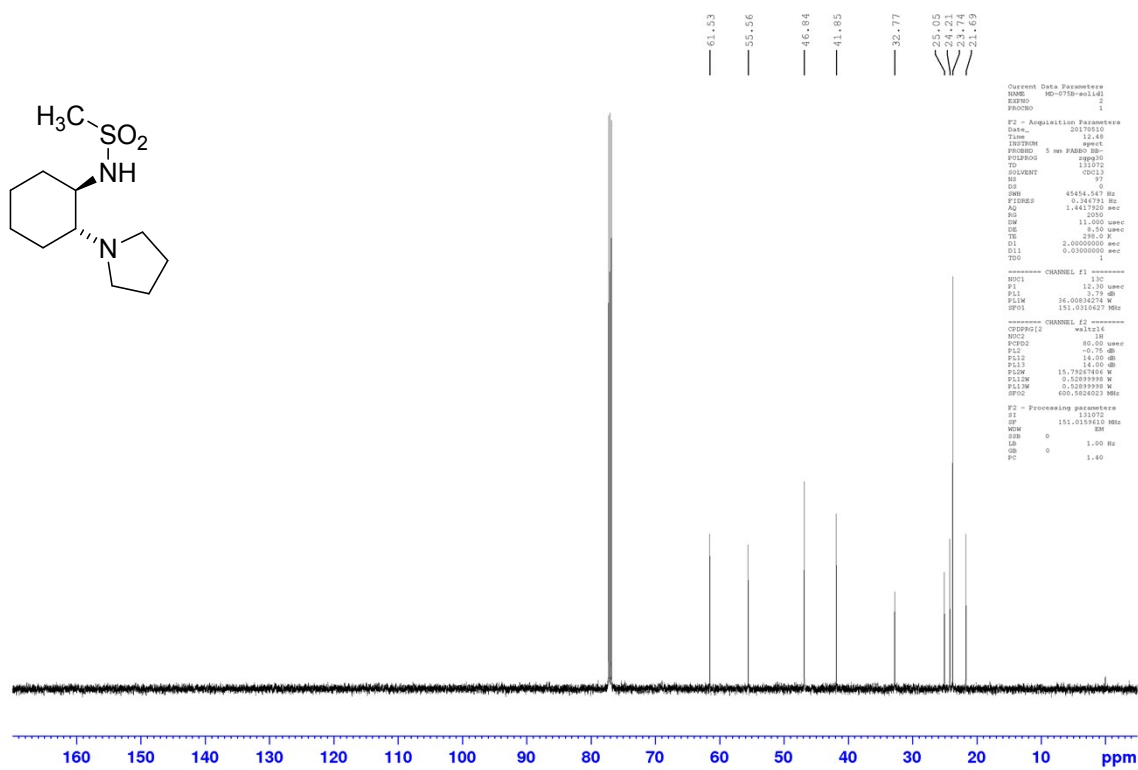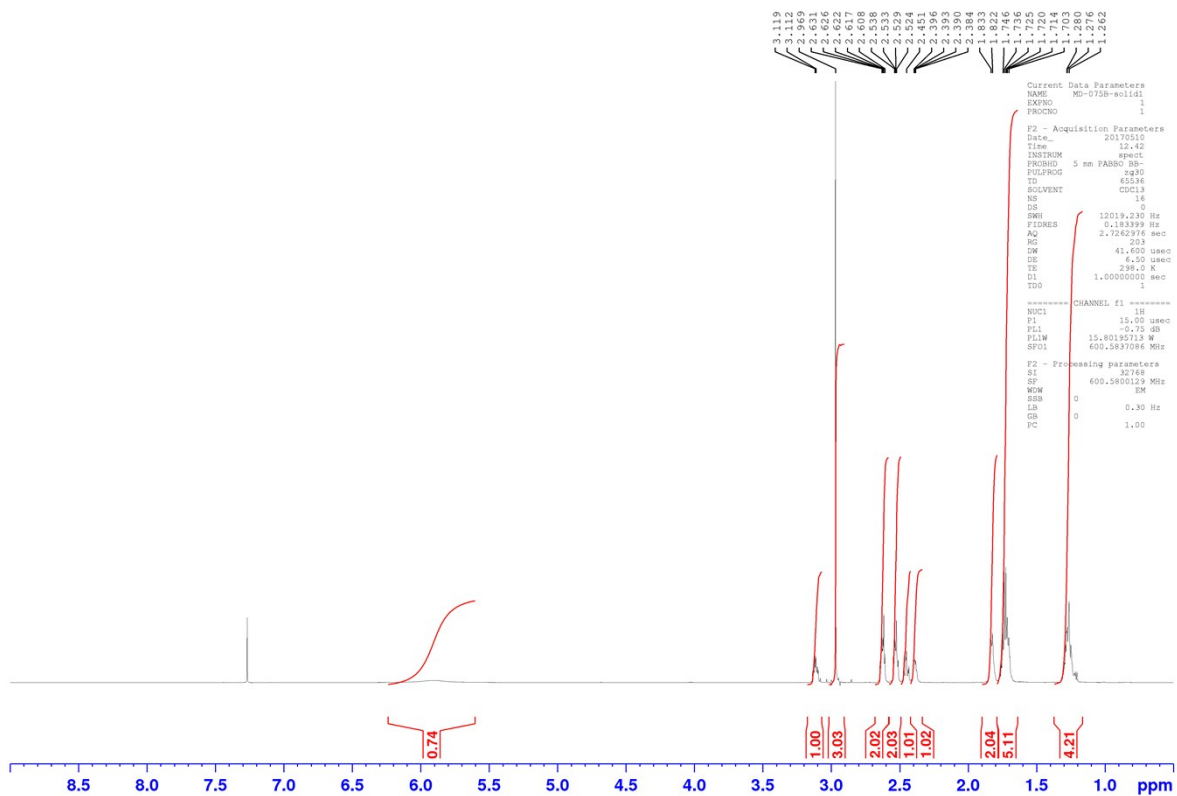

Figure S70. <sup>13</sup>C and <sup>1</sup>H NMR spectra (151 MHz, 600 MHz, CDCl<sub>3</sub>) for catalyst **1t**

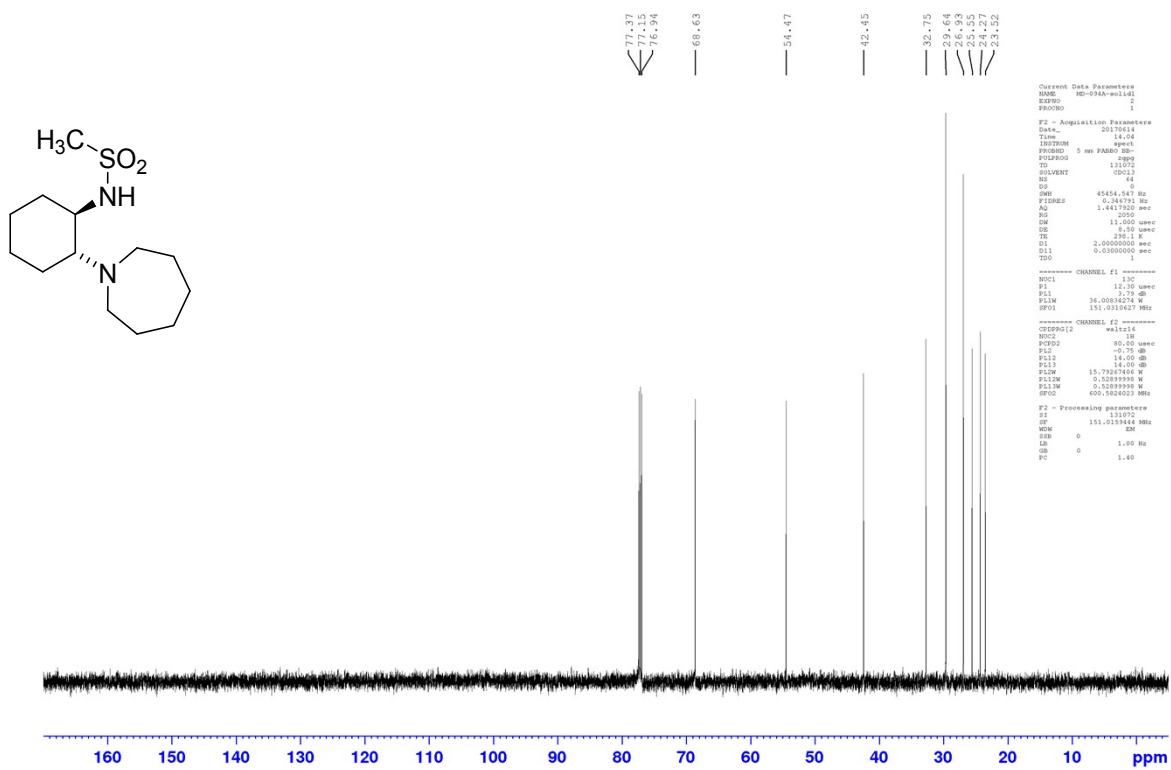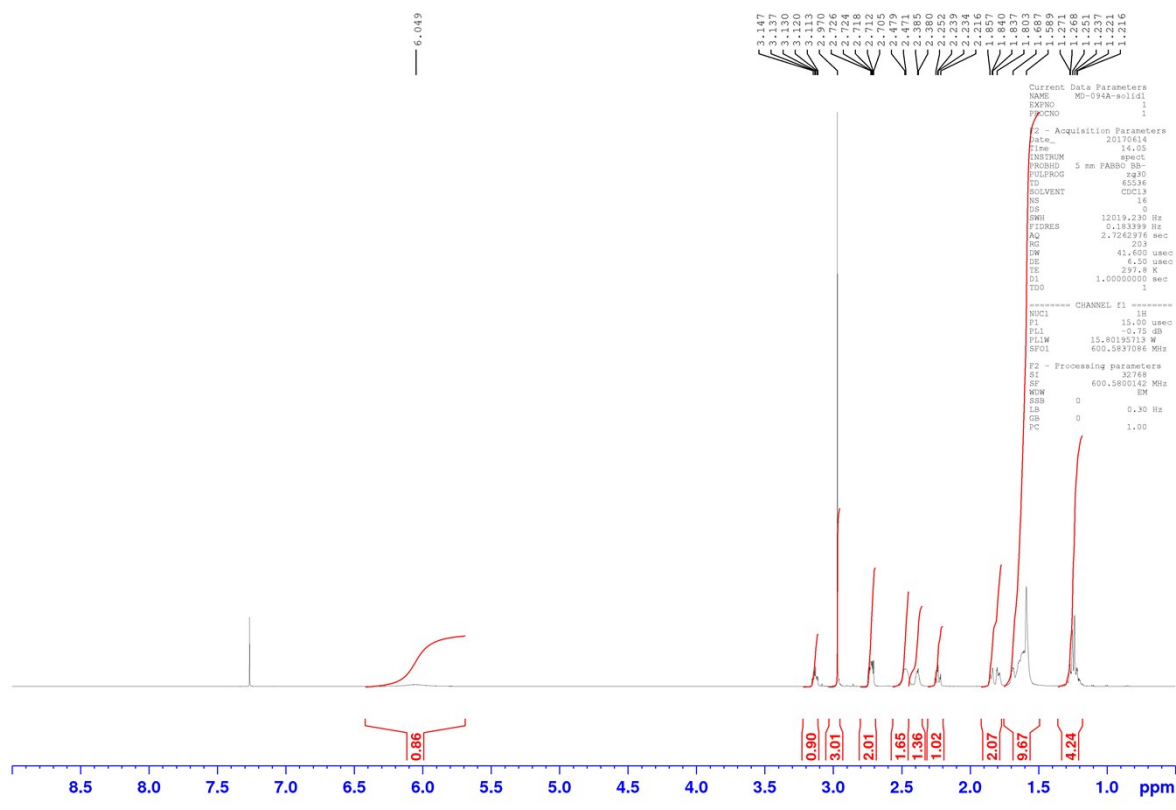

Figure S71. <sup>13</sup>C and <sup>1</sup>H NMR spectra (151 MHz, 600 MHz, CDCl<sub>3</sub>) for catalyst 3t

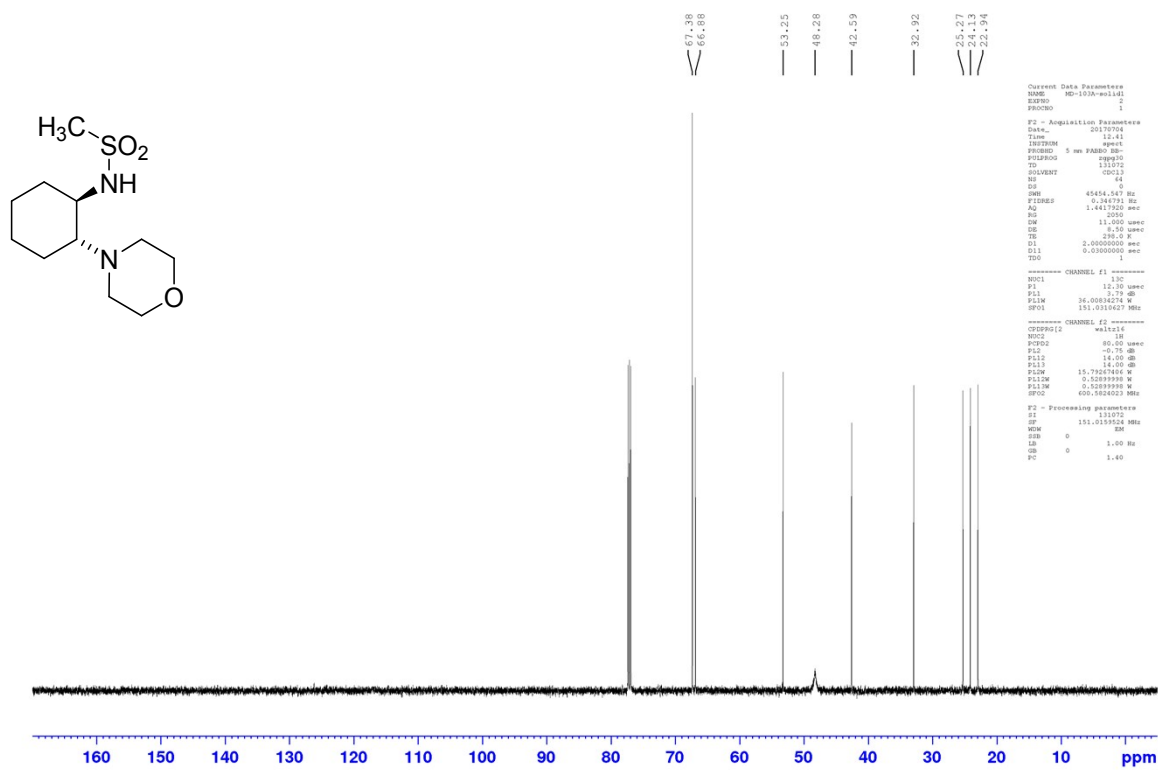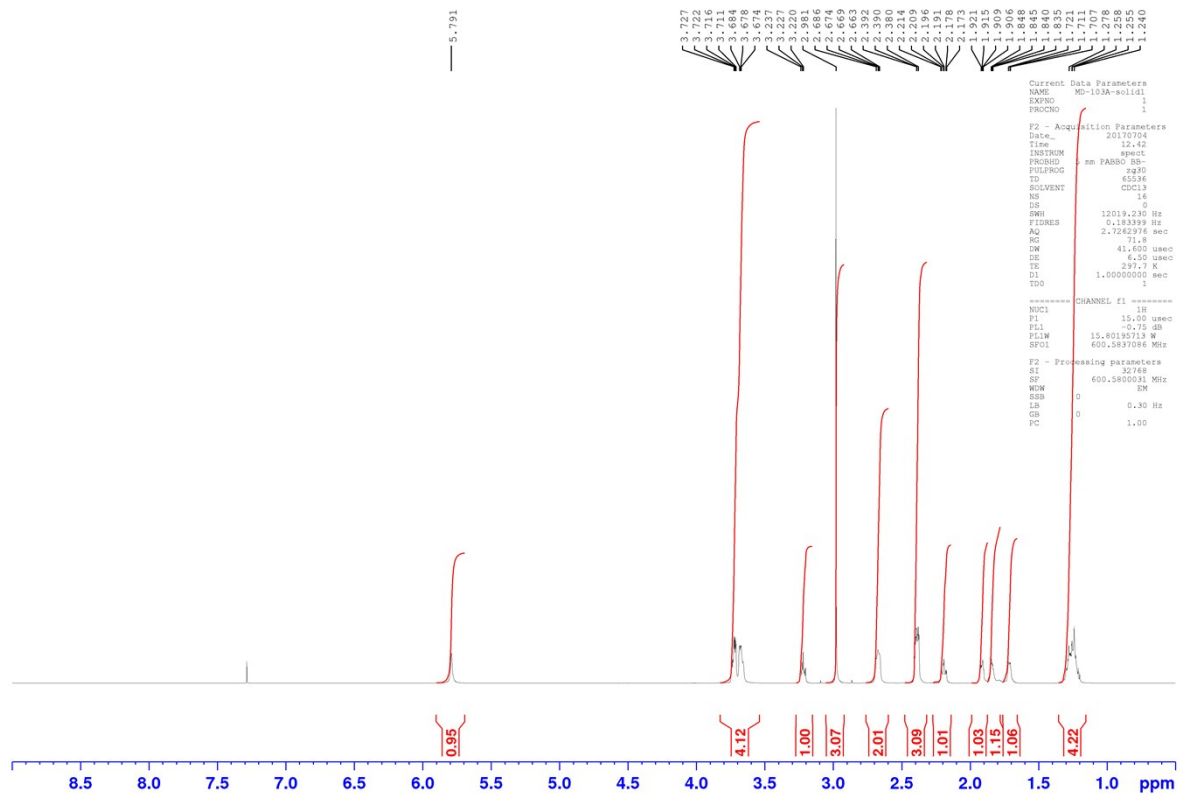

Figure S72. <sup>13</sup>C and <sup>1</sup>H NMR spectra (151 MHz, 600 MHz, CDCl<sub>3</sub>) for catalyst 4t



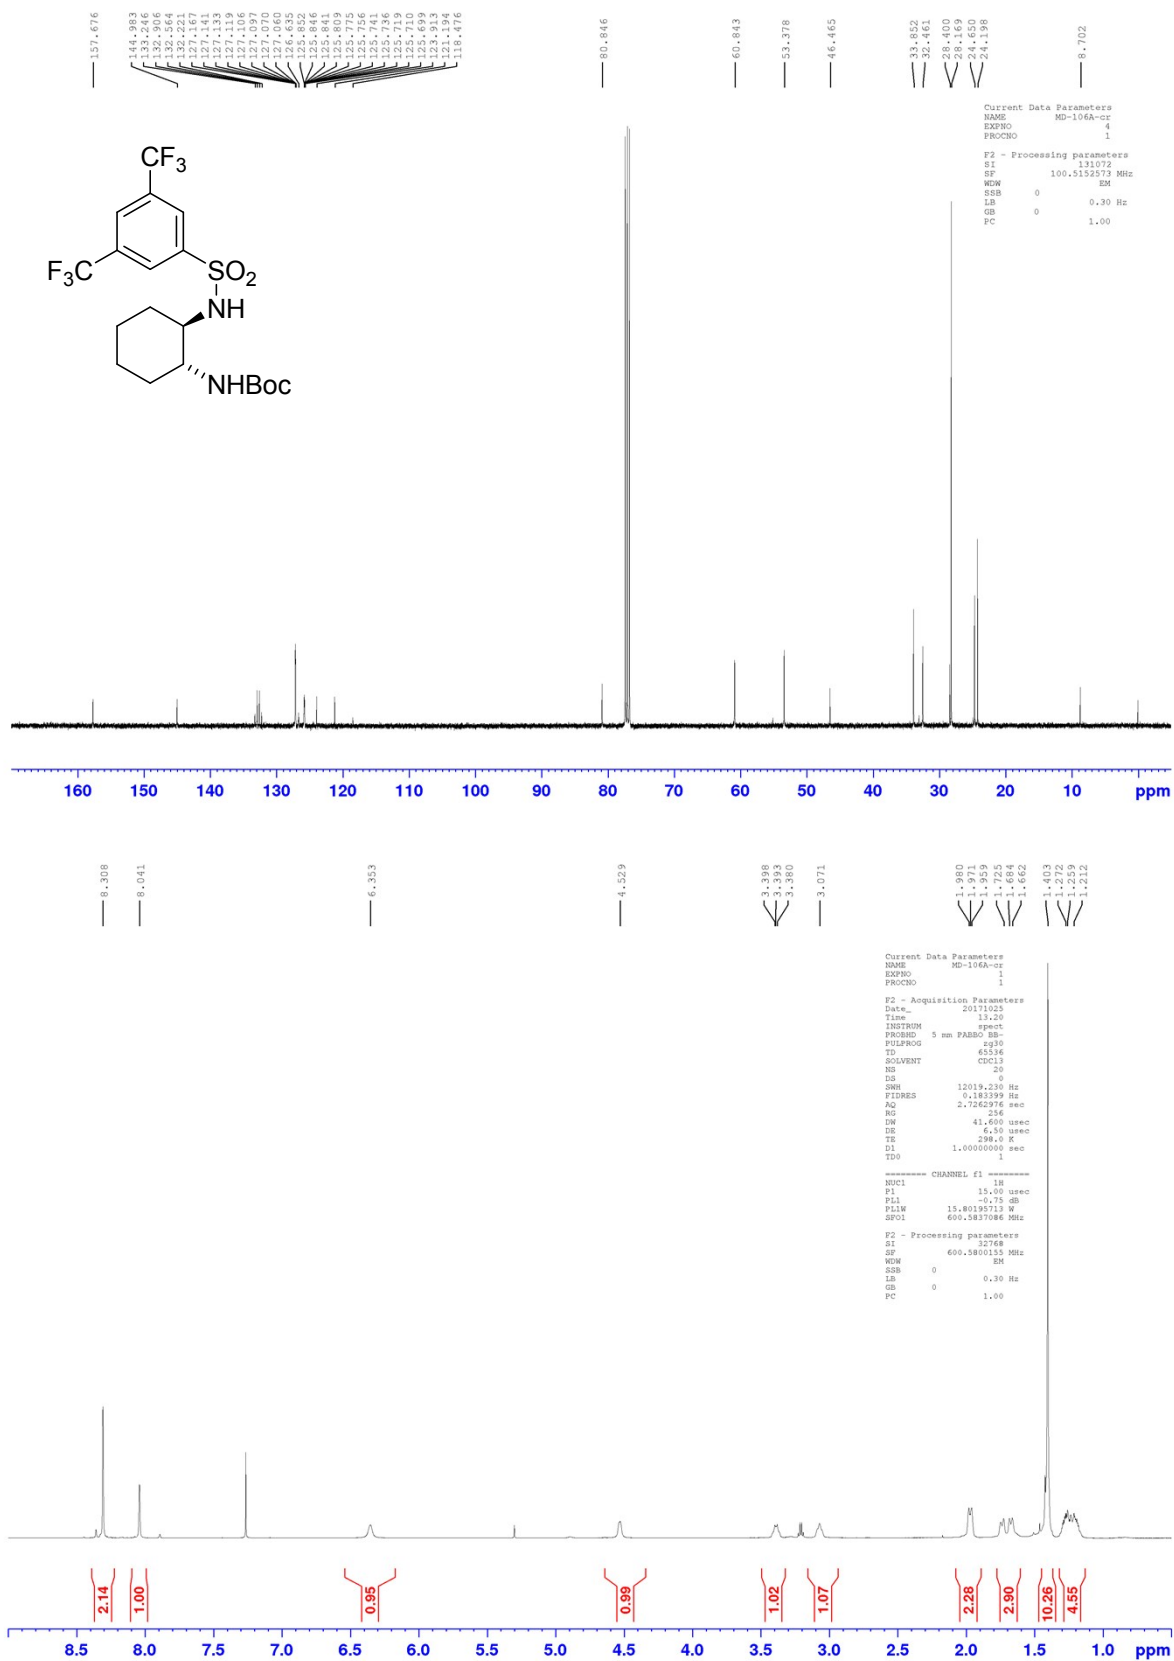

Figure S73. <sup>13</sup>C and <sup>1</sup>H NMR spectra (101 MHz, 600 MHz, CDCl<sub>3</sub>) for intermediate 14: *N*-((1*R*,2*R*)-2-(Boc-amino)cyclohexyl)-3,5-bis(trifluoromethyl)benzenesulfonamide

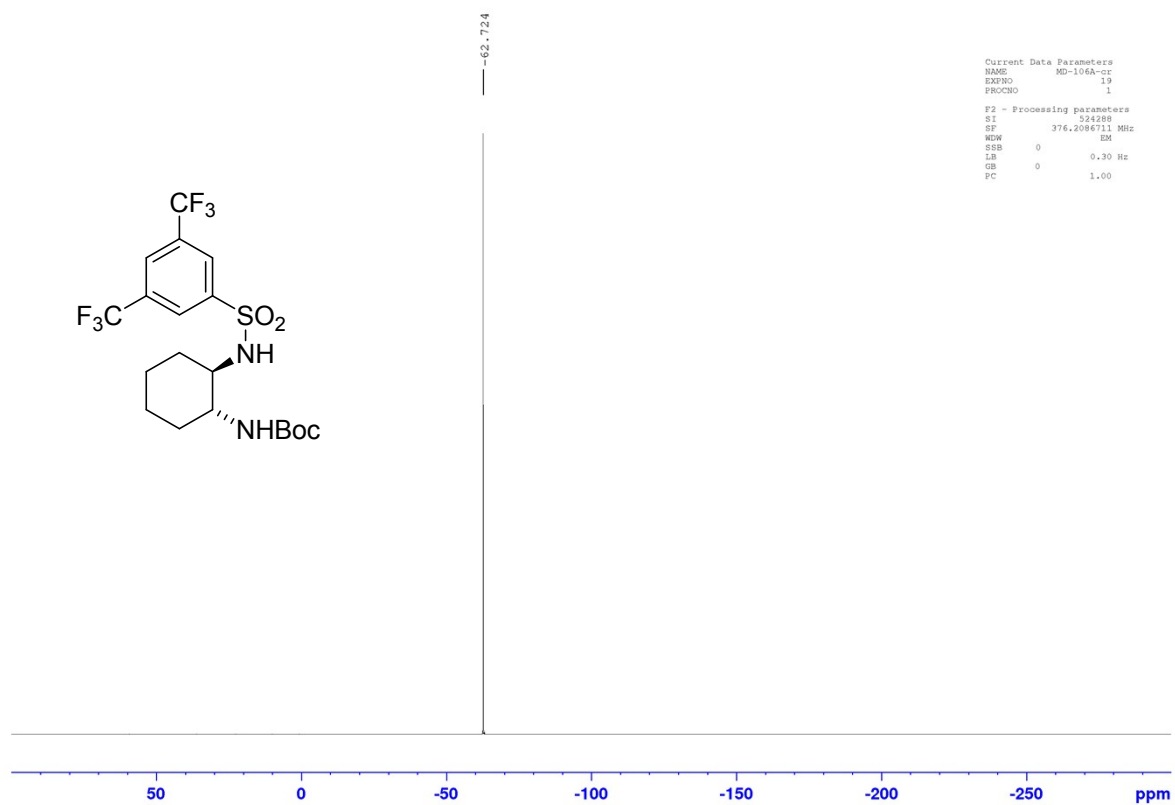

Figure S74.  $^{19}\text{F}$  NMR spectrum (376 MHz,  $\text{CDCl}_3$ ) for intermediate **14**: *N*-((1*R*,2*R*)-2-(Boc-amino)cyclohexyl)-3,5-bis(trifluoromethyl)benzenesulfonamide

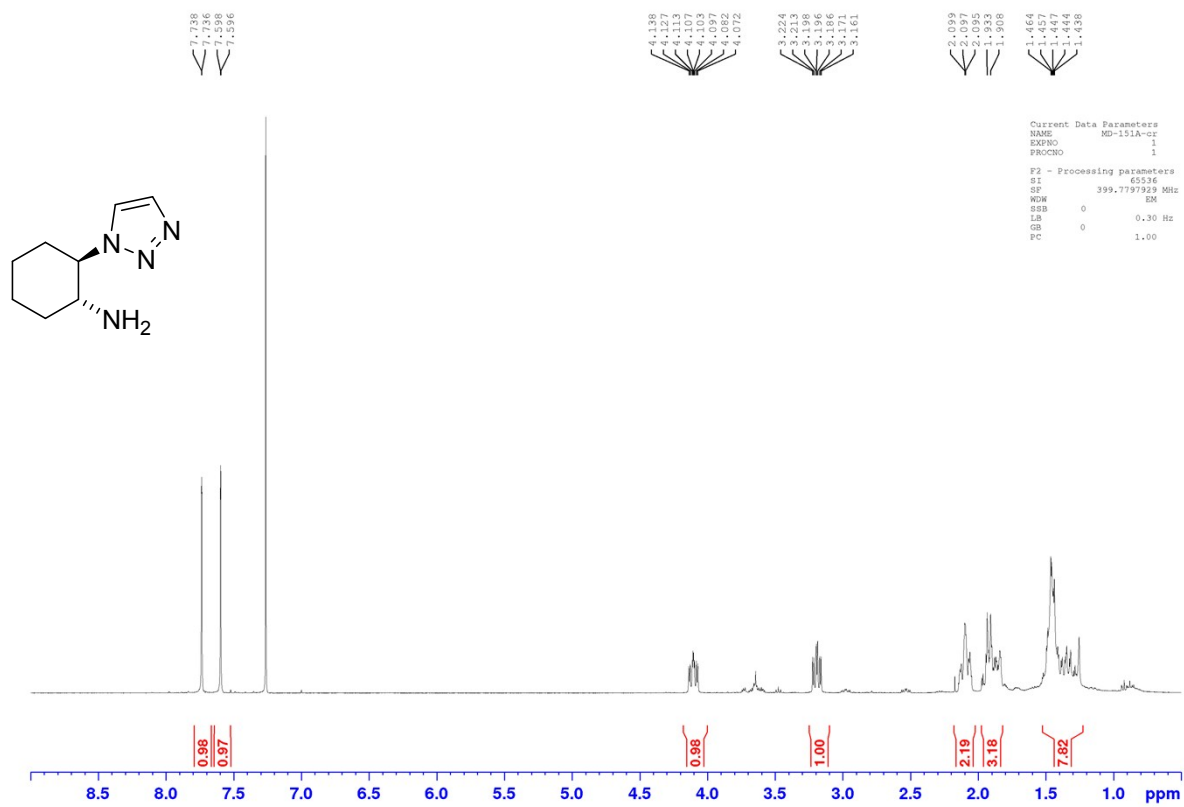

Figure S75.  $^1\text{H}$  NMR spectrum (400 MHz,  $\text{CDCl}_3$ ) for intermediate **17**: (1*R*,2*R*)-2-(1,2,3-triazol-1-yl)-cyclohexaneamine

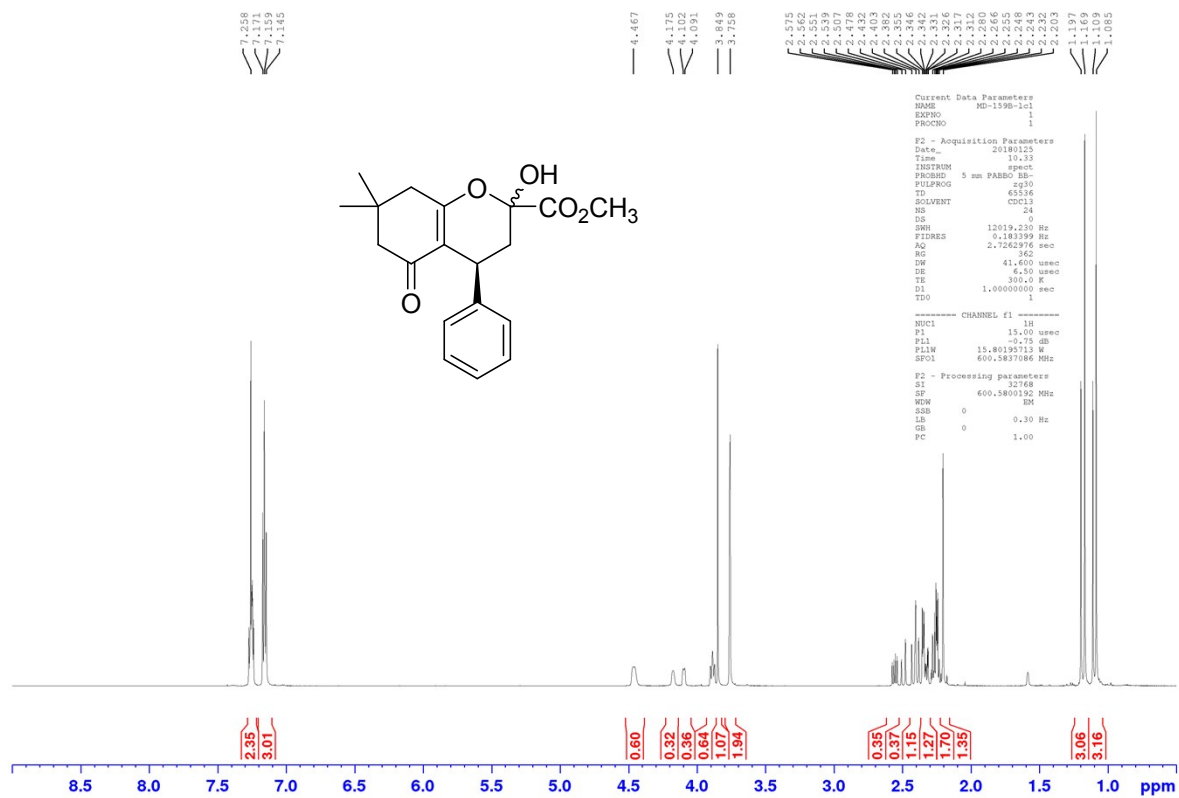

Figure S76.  $^1\text{H}$  NMR spectrum (600 MHz,  $\text{CDCl}_3$ ) for catalytic product **11a** (cf. Note on page S36)

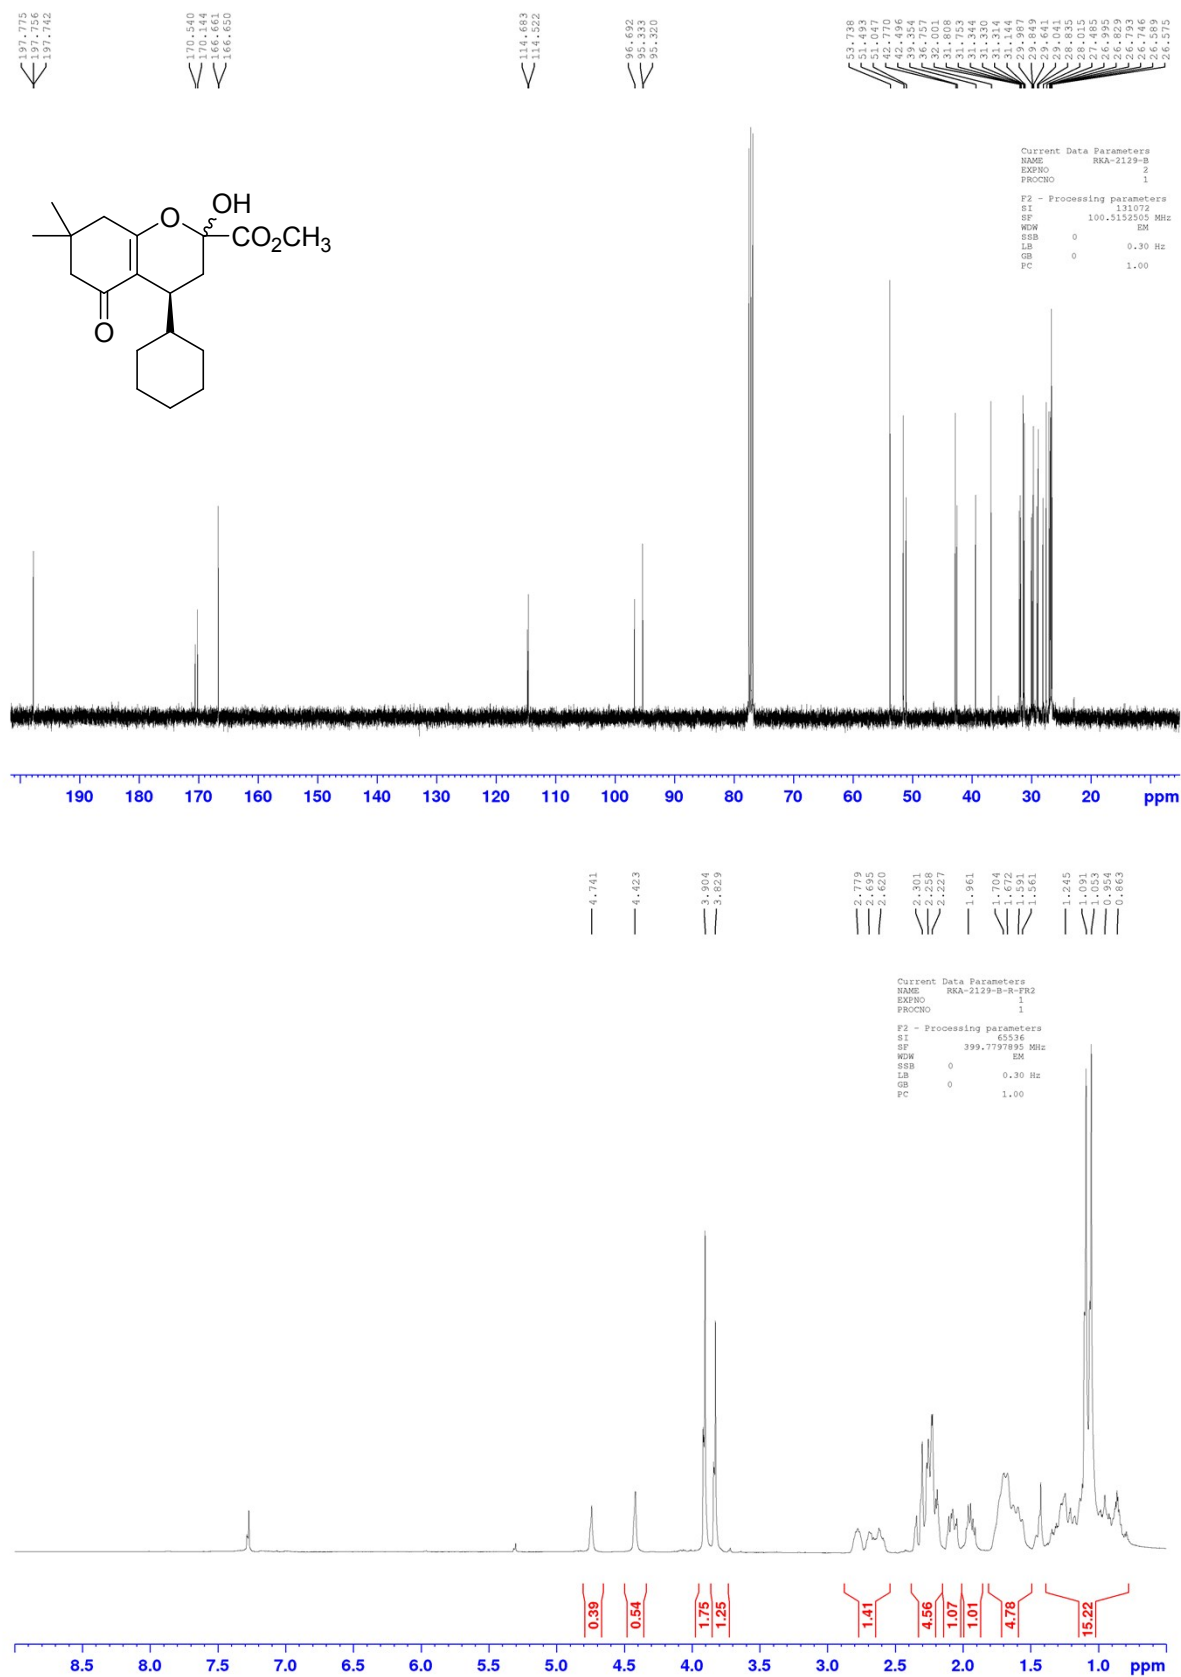

Figure S77. <sup>13</sup>C and <sup>1</sup>H NMR spectra (101 MHz, 400 MHz, CDCl<sub>3</sub>) for catalytic product **11b** (*cf.* Note on page S36)

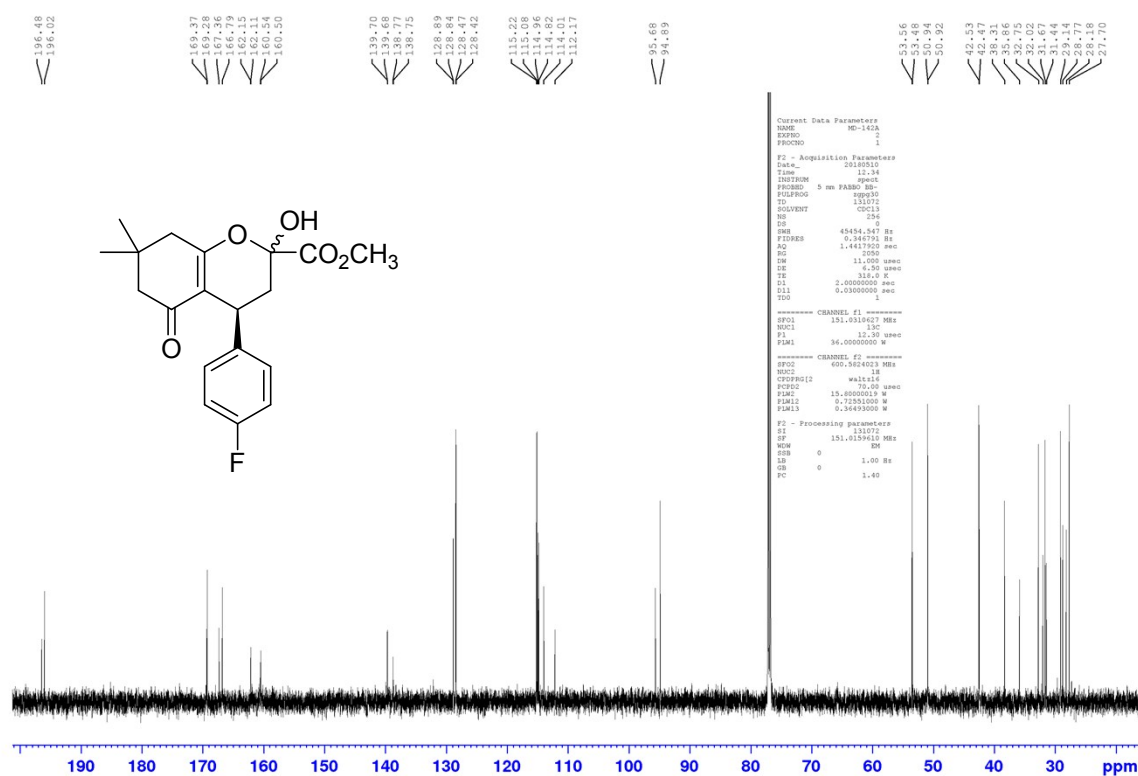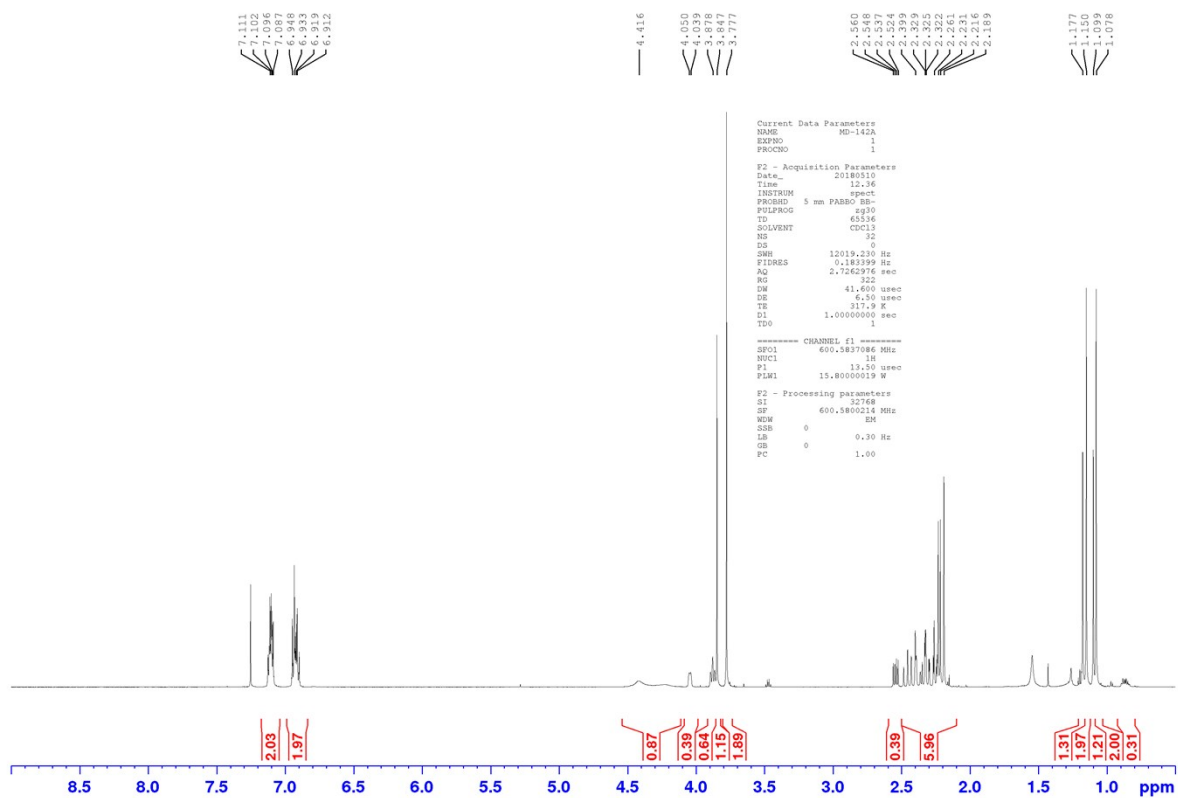

Figure S78. <sup>13</sup>C and <sup>1</sup>H NMR spectra (151 MHz, 600 MHz, CDCl<sub>3</sub>) for catalytic product **11c** (cf. Note on page S36)

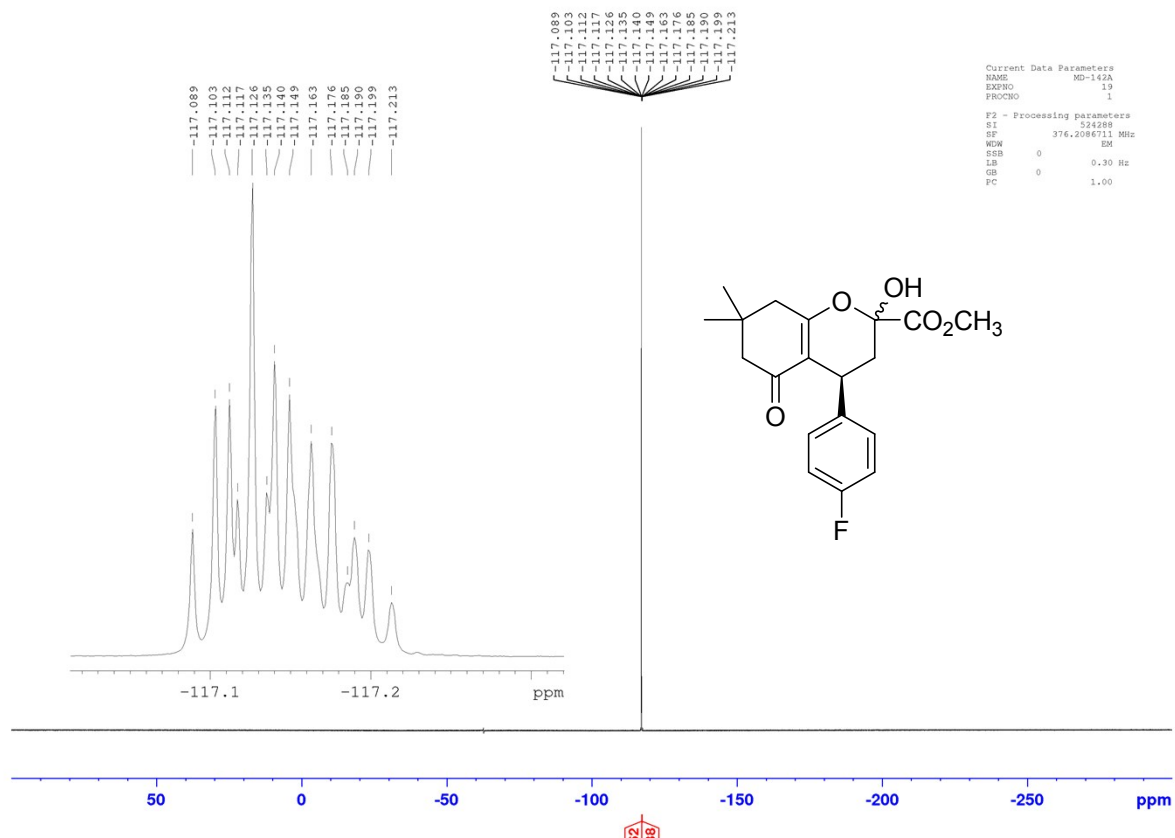

Figure S79.  $^{19}\text{F}$  NMR (376MHz,  $\text{CDCl}_3$ ) spectrum for **11c**

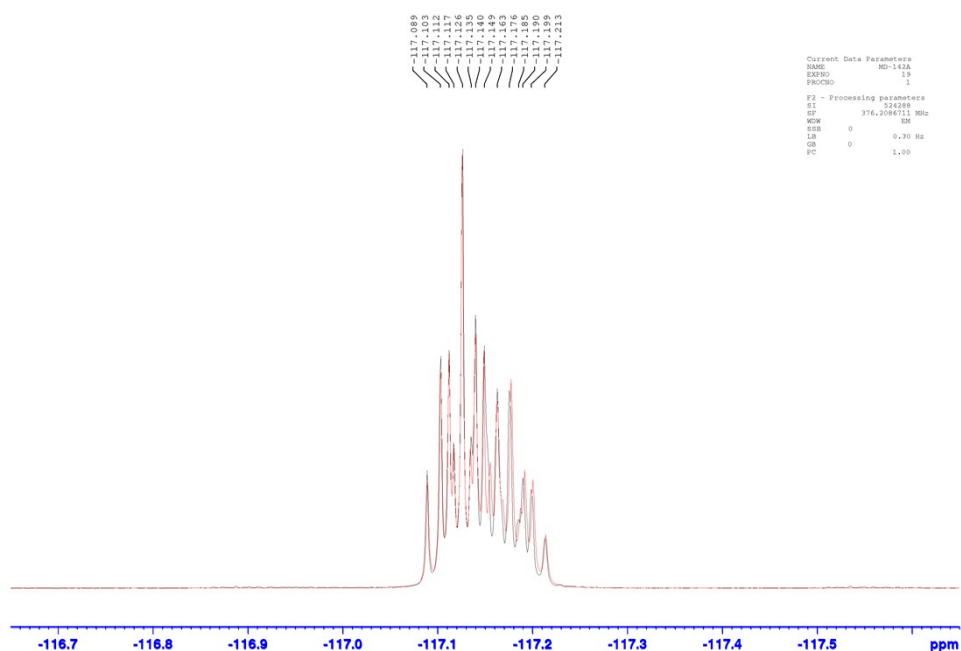

Figure S80. Overlay of experimental  $^{19}\text{F}$  NMR (376 MHz,  $\text{CDCl}_3$ ) spectrum for **11c** (black) and NMR simulation assuming following parameters: -117.126 (tt,  $J=8.6$ , 5.2 Hz, 1 F, linewidth 1.1 Hz), -117.176 (tt,  $J=8.6$ , 5.2 Hz, 0.66 F, 1.4 Hz), corresponding to two anomers (*cf.* Note on page S36)

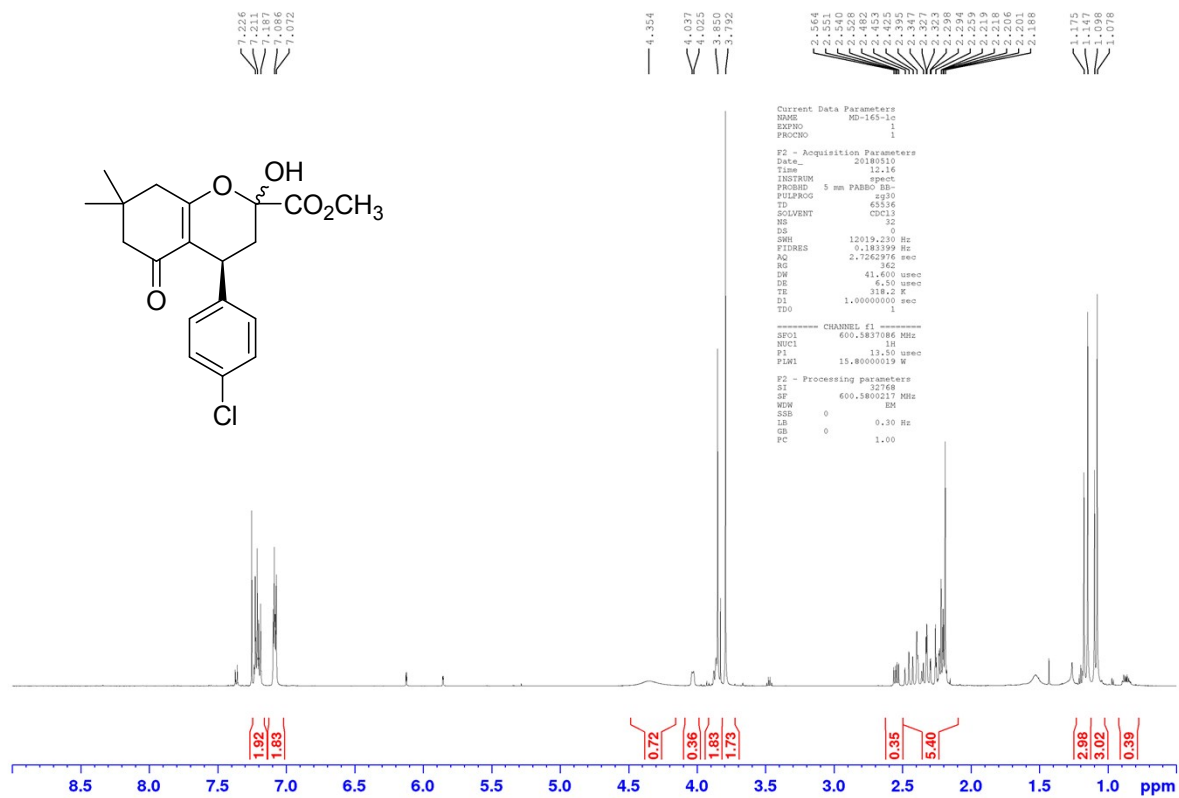

Figure S81.  $^1\text{H}$  NMR spectrum (600 MHz,  $\text{CDCl}_3$ ) for catalytic product **11d** (*cf.* Note on page S36)



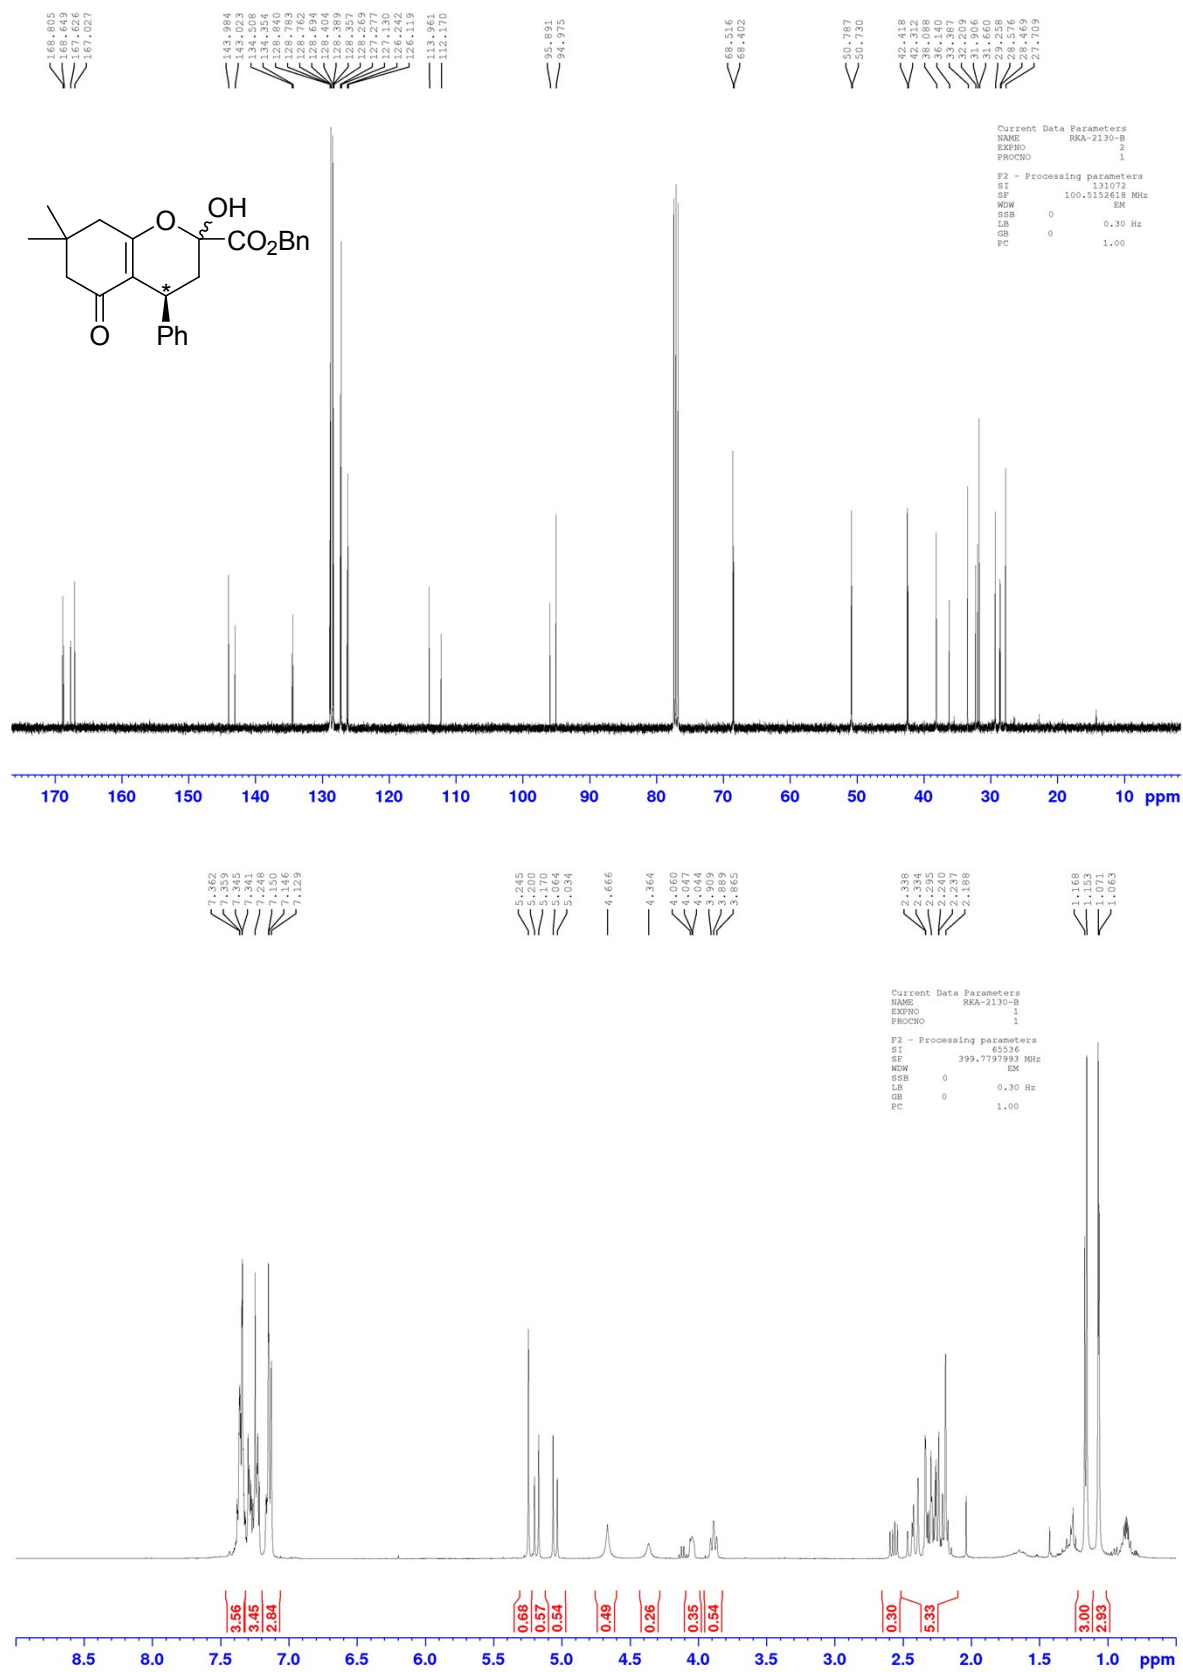

Figure S82. <sup>13</sup>C and <sup>1</sup>H NMR spectra (101 MHz, 400 MHz, CDCl<sub>3</sub>) for catalytic product **11e** (*cf.* Note on page S36)

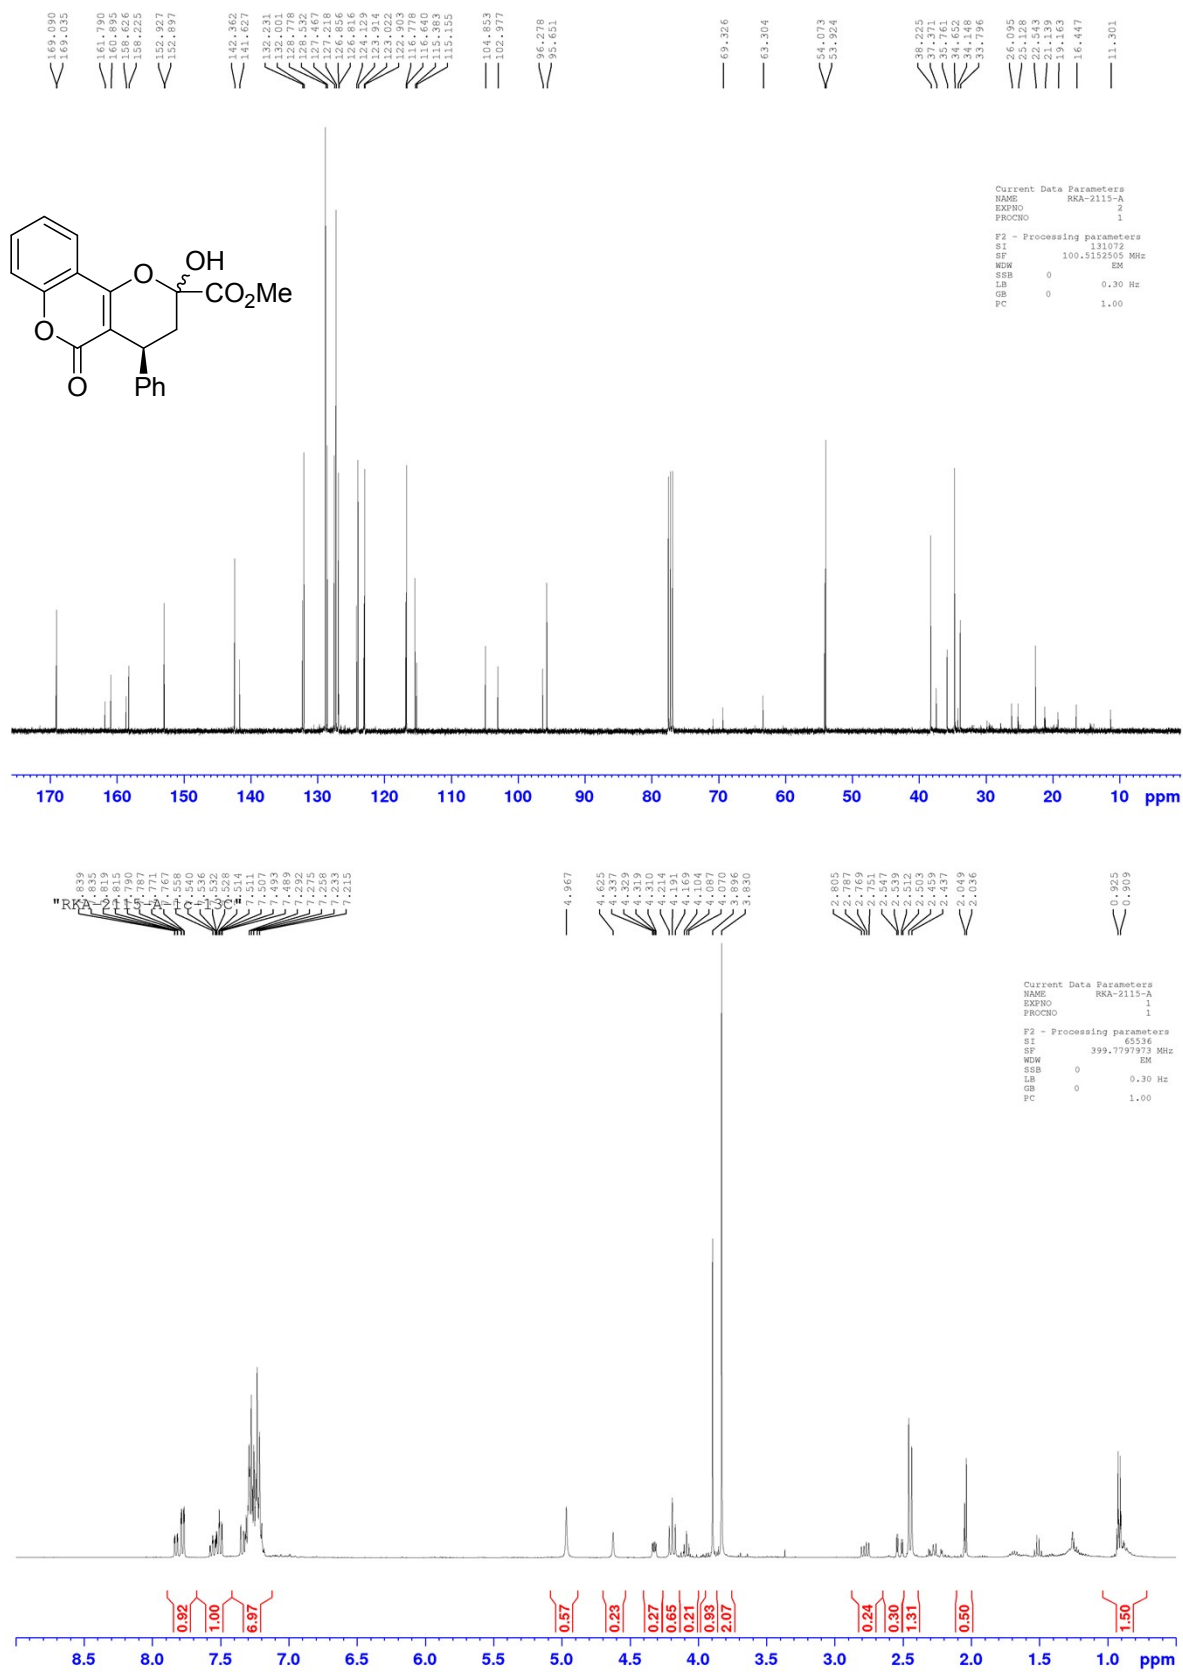

Figure S83. <sup>13</sup>C and <sup>1</sup>H NMR spectra (101 MHz, 400 MHz, CDCl<sub>3</sub>) for catalytic product **11f** (*cf.* Note on page S36)

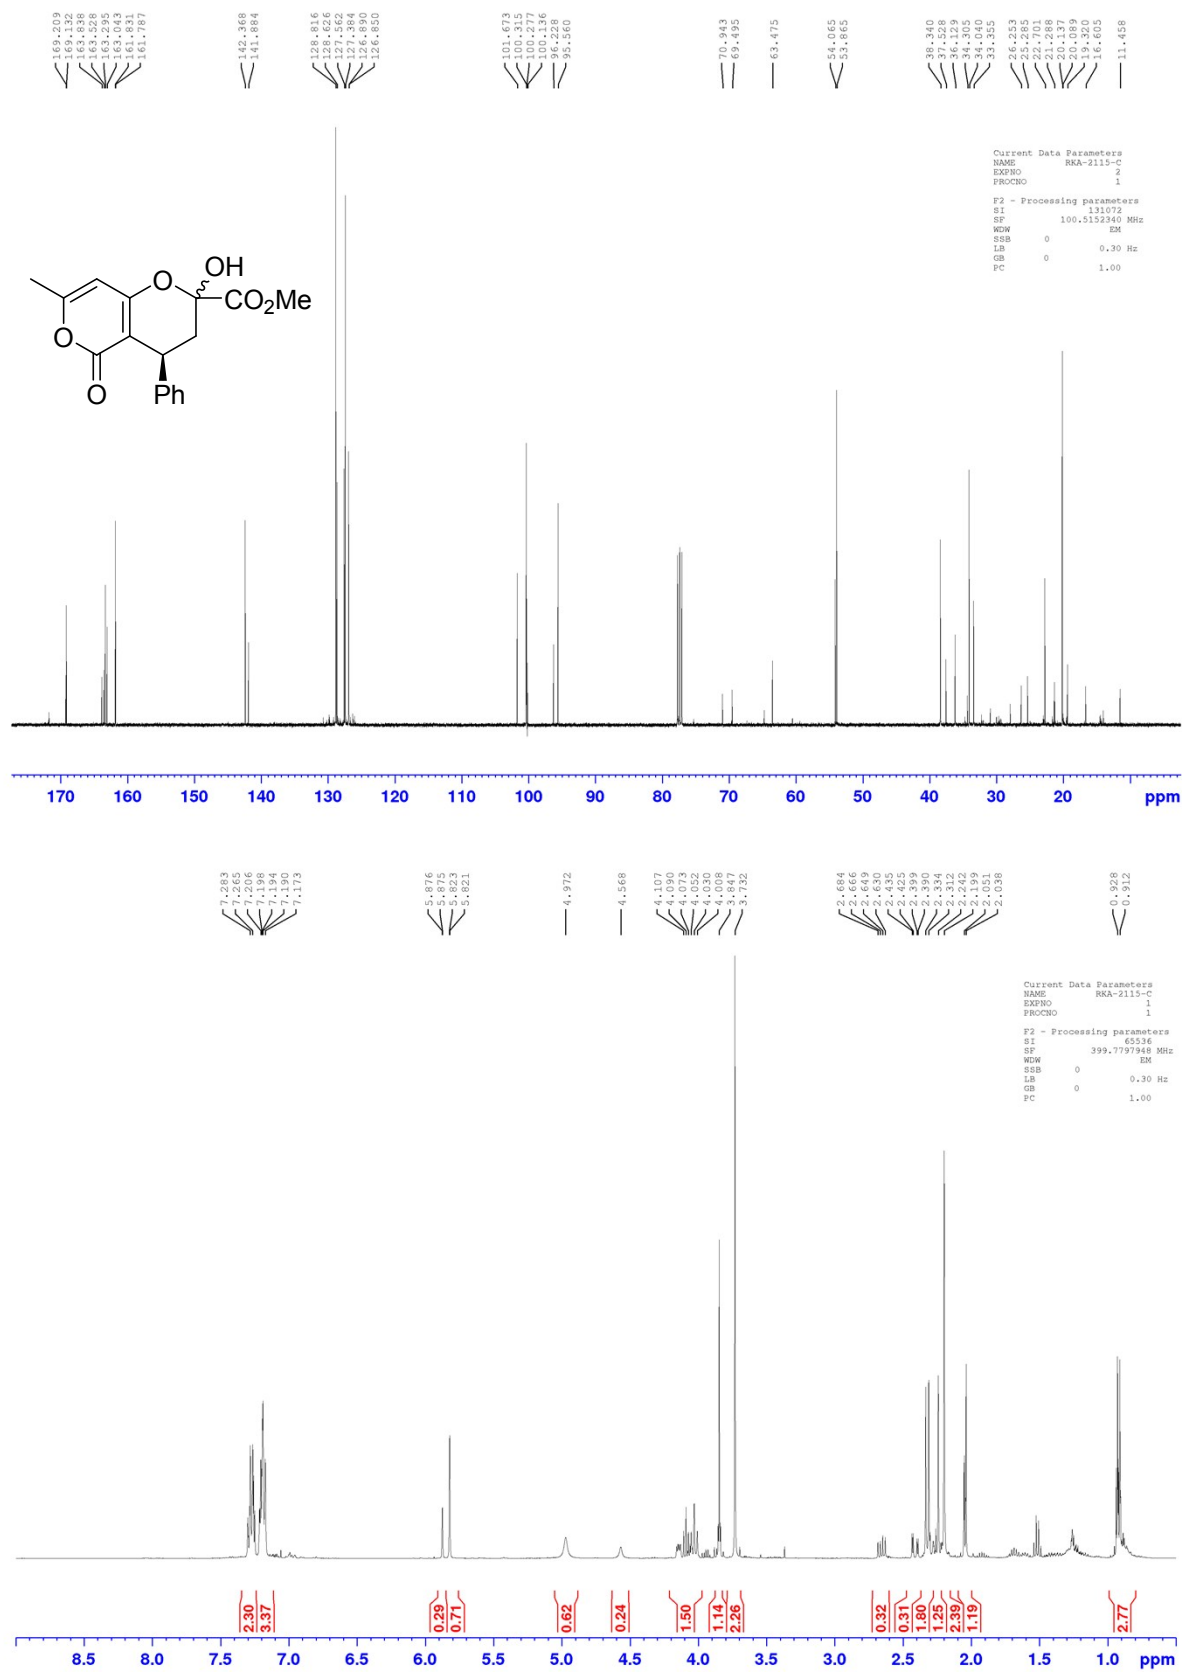

Figure S84. <sup>13</sup>C and <sup>1</sup>H NMR spectra (101 MHz, 400 MHz, CDCl<sub>3</sub>) for catalytic product **11g** (*cf.* Note on page S36)

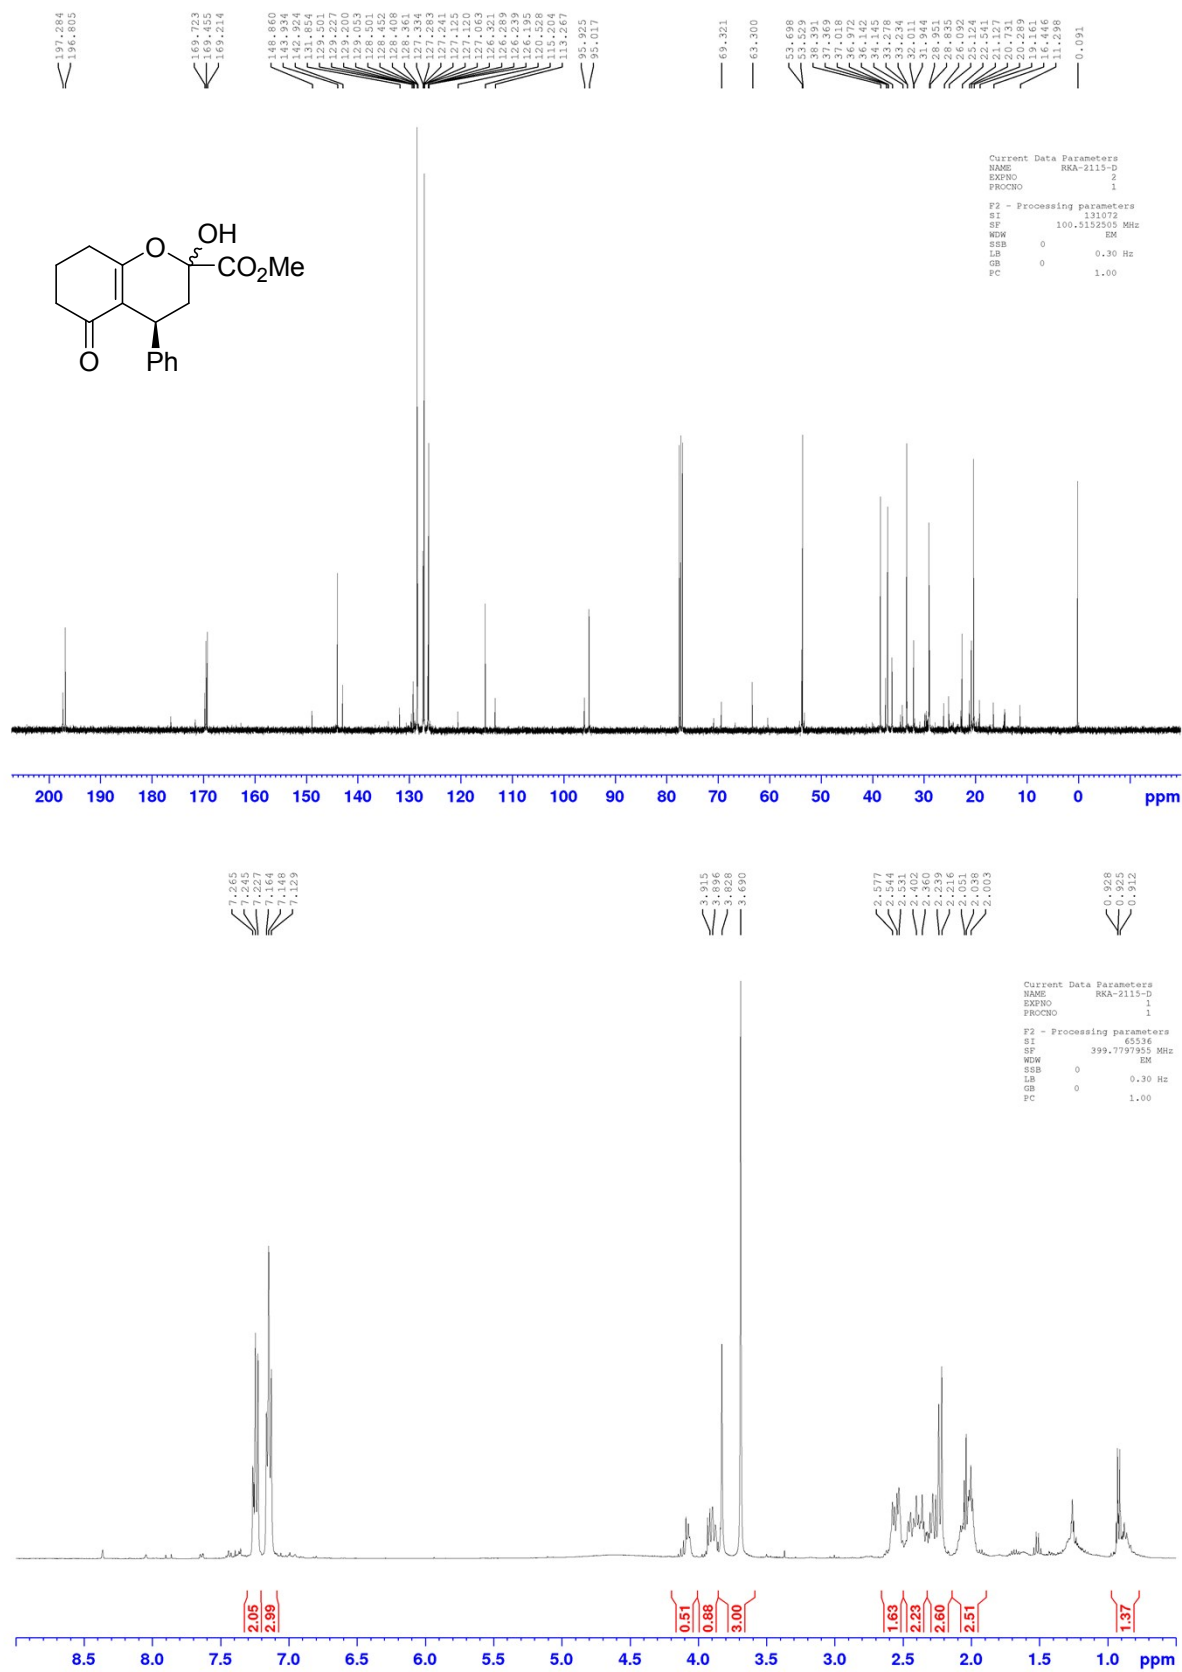

Figure S85. <sup>13</sup>C and <sup>1</sup>H NMR spectra (101 MHz, 400 MHz, CDCl<sub>3</sub>) for catalytic product **11h** (*cf.* Note on page S36)

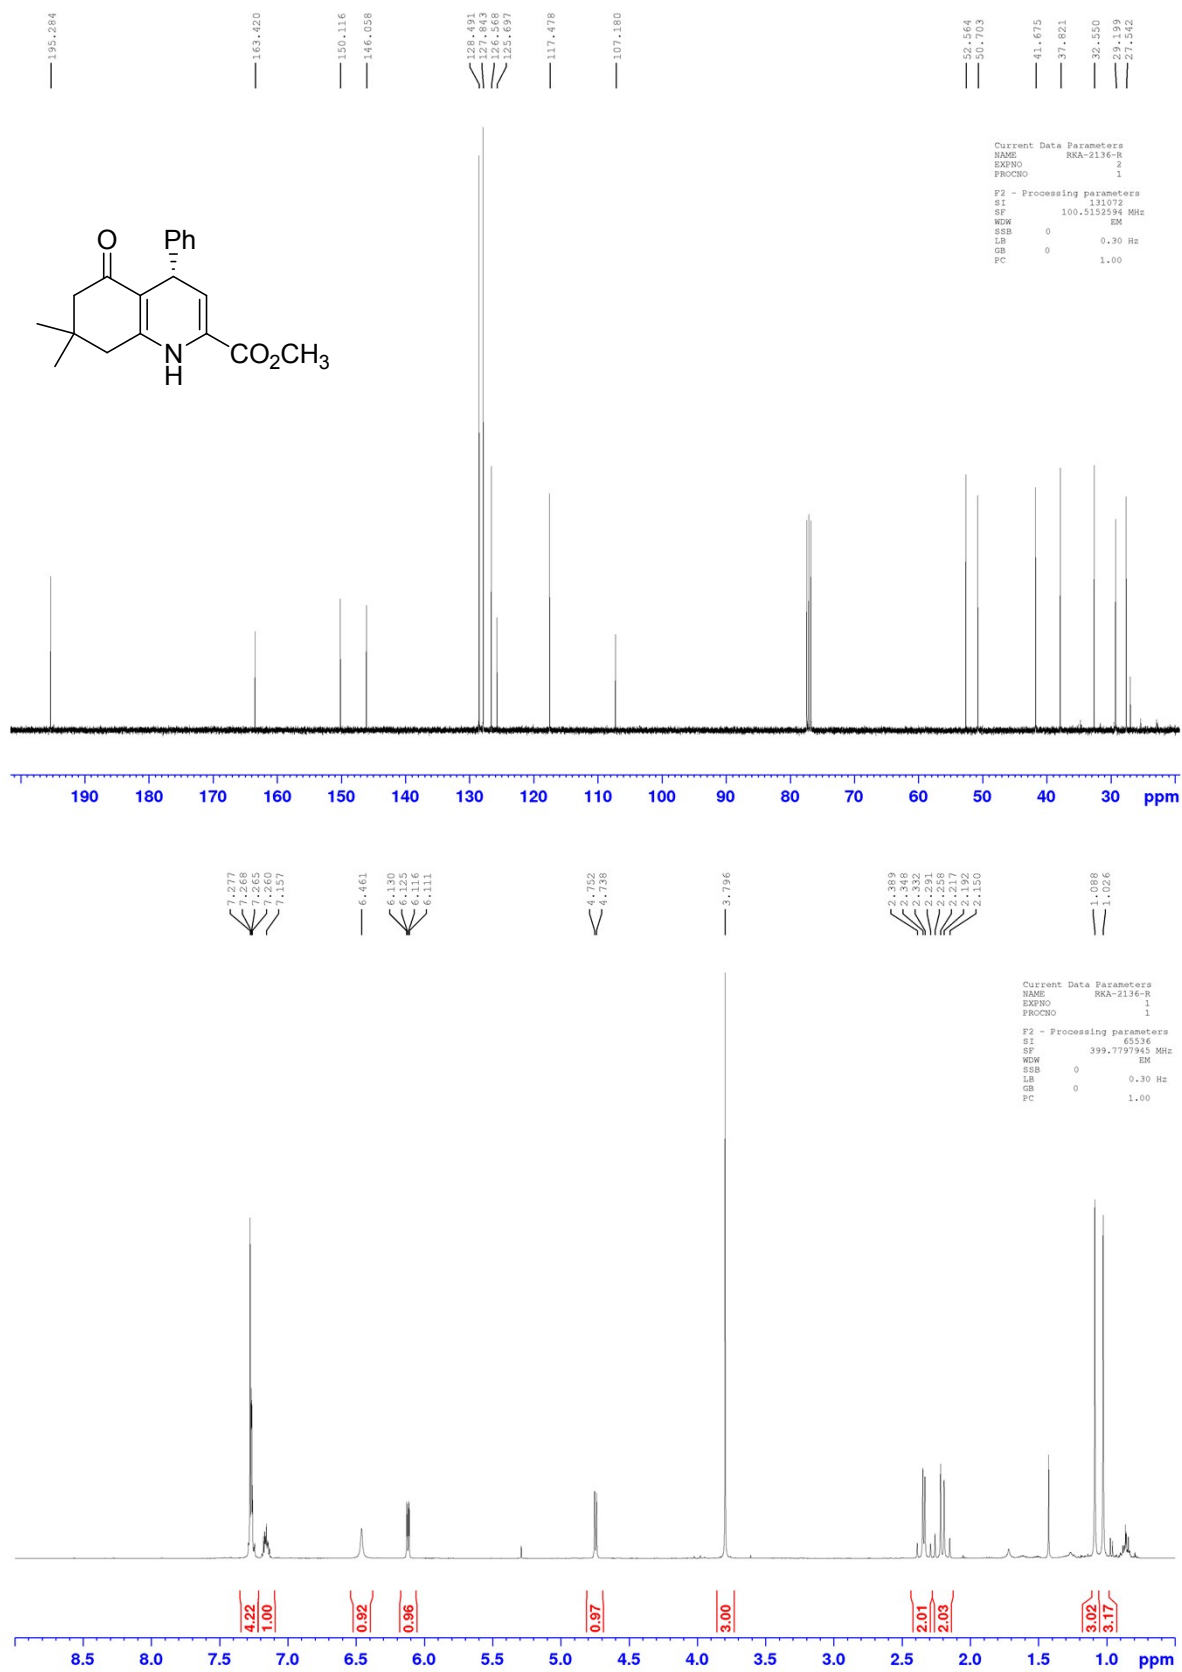

Figure S86. <sup>13</sup>C and <sup>1</sup>H NMR spectra (101 MHz, 400 MHz, CDCl<sub>3</sub>) for end product **12**

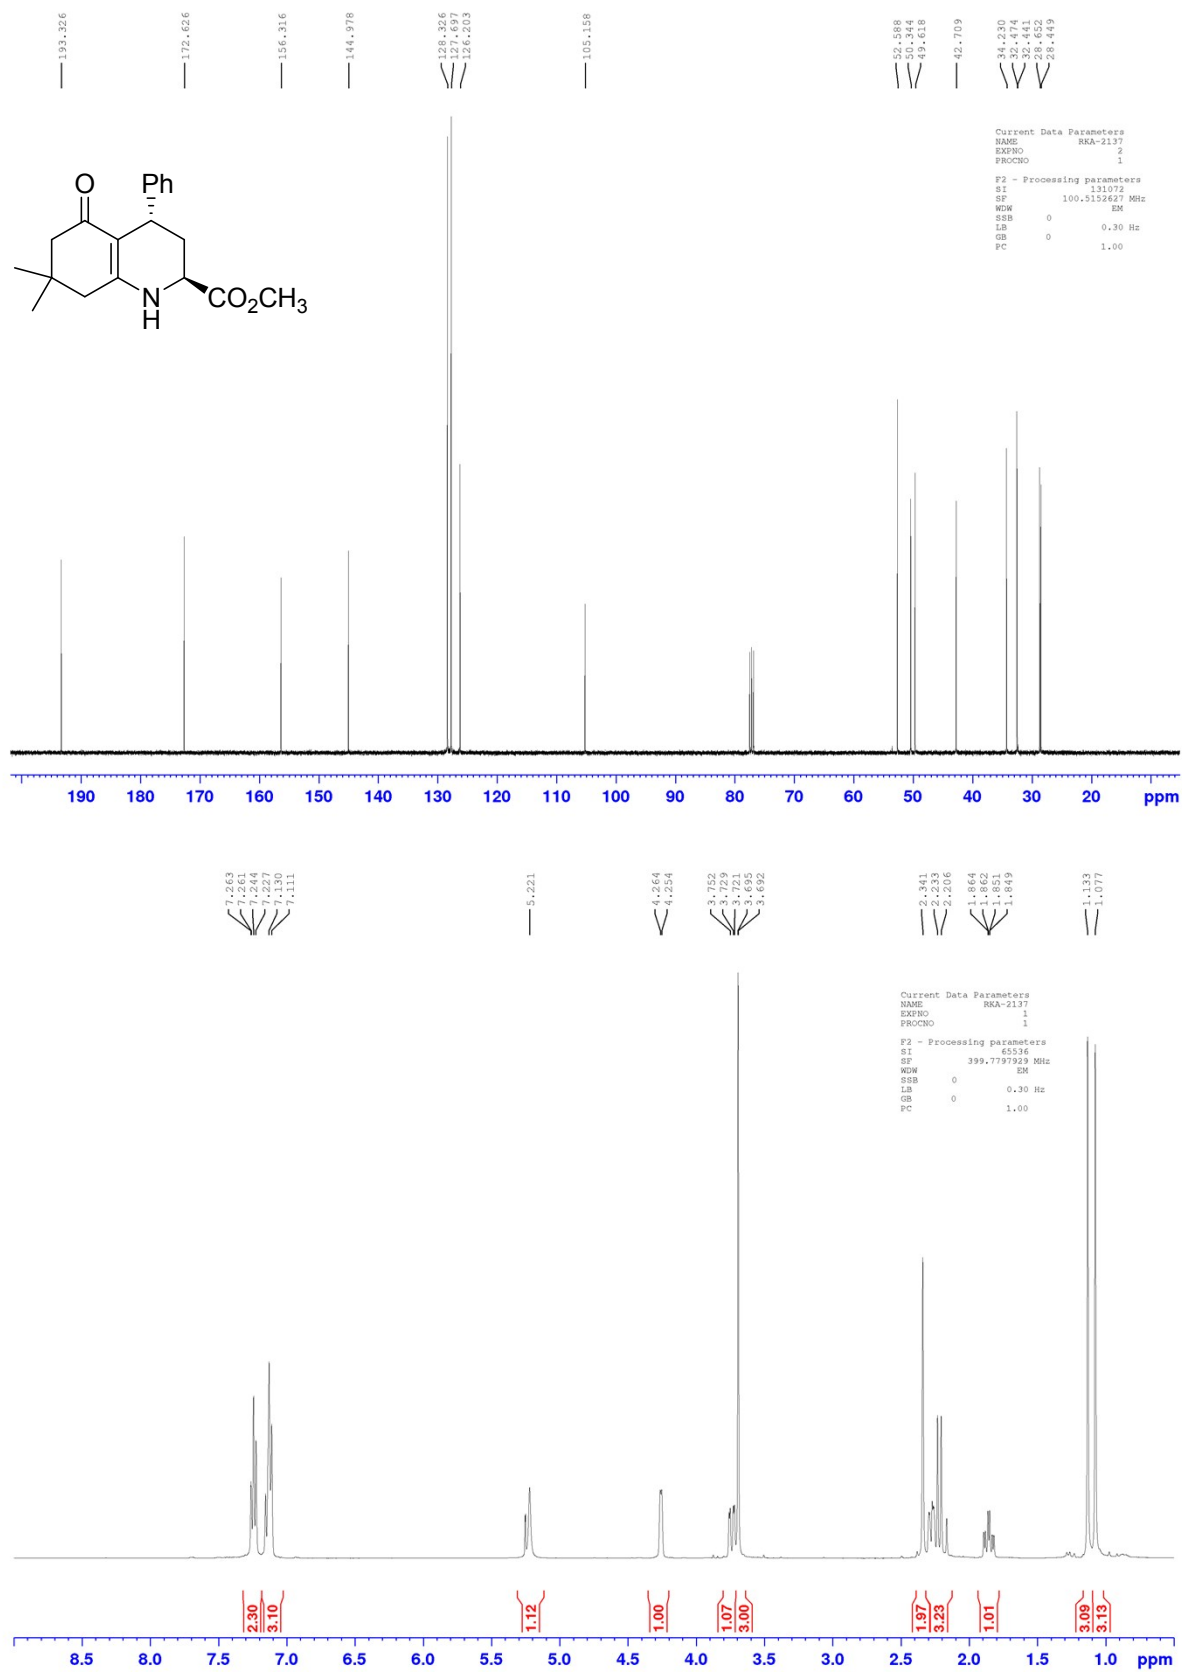

Figure S87. <sup>13</sup>C and <sup>1</sup>H NMR spectra (101 MHz, 400 MHz, CDCl<sub>3</sub>) for end product **13**

## Chiral HPLC chromatograms

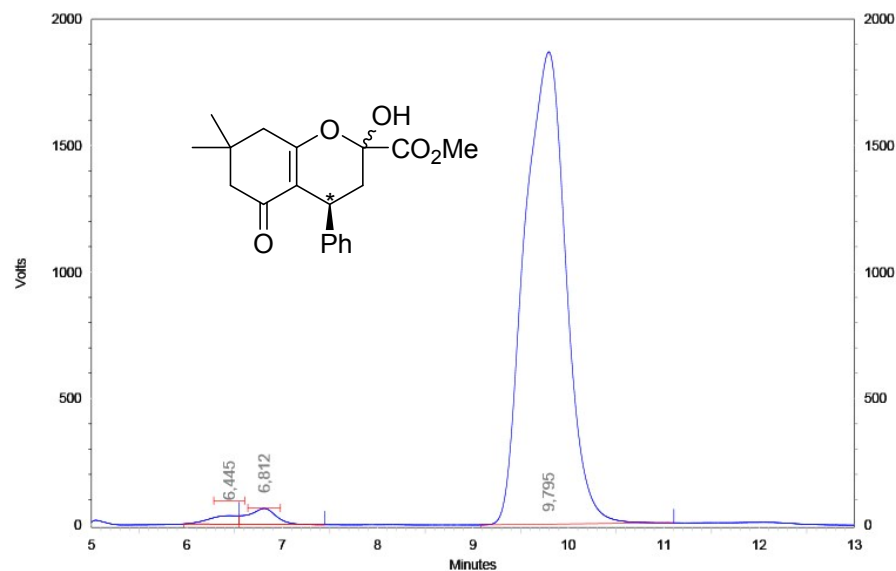

UV2000-254nm  
Results (System  
2018-05-04  
10:04:05)  
(Reprocessed)

| Retention Time | Area     | Area % | Height  | Height % |
|----------------|----------|--------|---------|----------|
| 6,445          | 692329   | 1,20   | 33396   | 1,70     |
| 6,812          | 1276038  | 2,20   | 62926   | 3,20     |
| 9,795          | 55909361 | 96,60  | 1867053 | 95,09    |

| Totals | Area     | Area % | Height  | Height % |
|--------|----------|--------|---------|----------|
|        | 57877728 | 100,00 | 1963375 | 100,00   |

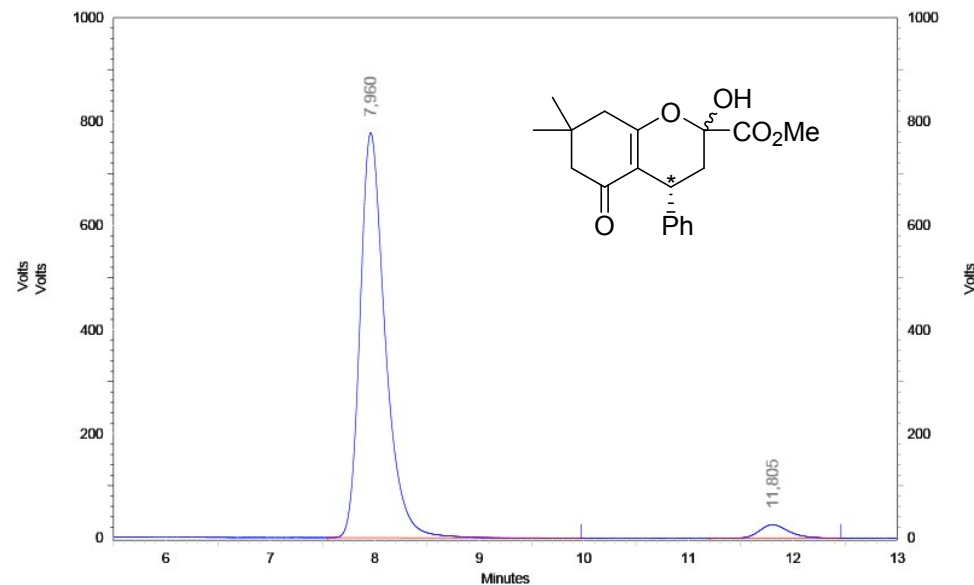

UV2000-254nm  
Results (System  
2018-06-08  
15:38:49)  
(Original)

| Retention Time | Area     | Area % | Height | Height % |
|----------------|----------|--------|--------|----------|
| 7,960          | 13004919 | 96,20  | 778829 | 96,76    |
| 11,805         | 514200   | 3,80   | 26089  | 3,24     |

| Totals | Area     | Area % | Height | Height % |
|--------|----------|--------|--------|----------|
|        | 13519119 | 100,00 | 804918 | 100,00   |

Figure S88. HPLC chromatograms (Chiralpak AD-H, 4.6 mm ID × 250 mm, hexane/2-propanol 7:3, 0.7 mL/min) for adduct **11a** obtained from methyl benzylidenepyruvate (**9a**) and dimedone (**10**) using 10% mol catalysts **2a** (left) and *ent*-**2a** (right) in toluene. The results shown correspond to Table 1 entries 2 and 3. For HPLC chromatogram of a racemic sample, see Figure S91.

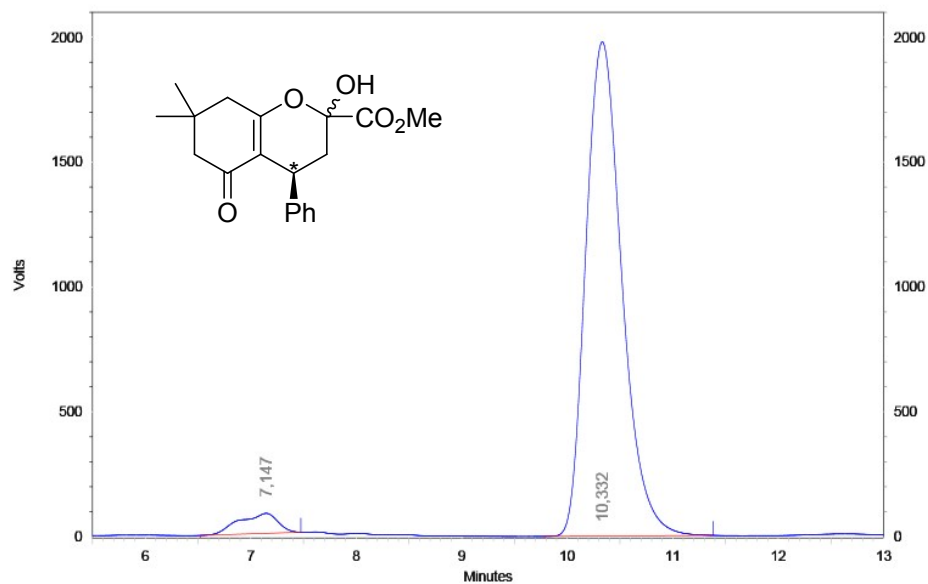

UV2000-254nm  
Results (System  
(2017-12-20  
13:59:52)  
(Original))

| Retention Time | Area     | Area % | Height  | Height % |
|----------------|----------|--------|---------|----------|
| 7,147          | 2055247  | 4,19   | 79954   | 3,88     |
| 10,332         | 47037655 | 95,81  | 1978627 | 96,12    |

| Totals | Area     | Area % | Height  | Height % |
|--------|----------|--------|---------|----------|
|        | 49092902 | 100,00 | 2058581 | 100,00   |

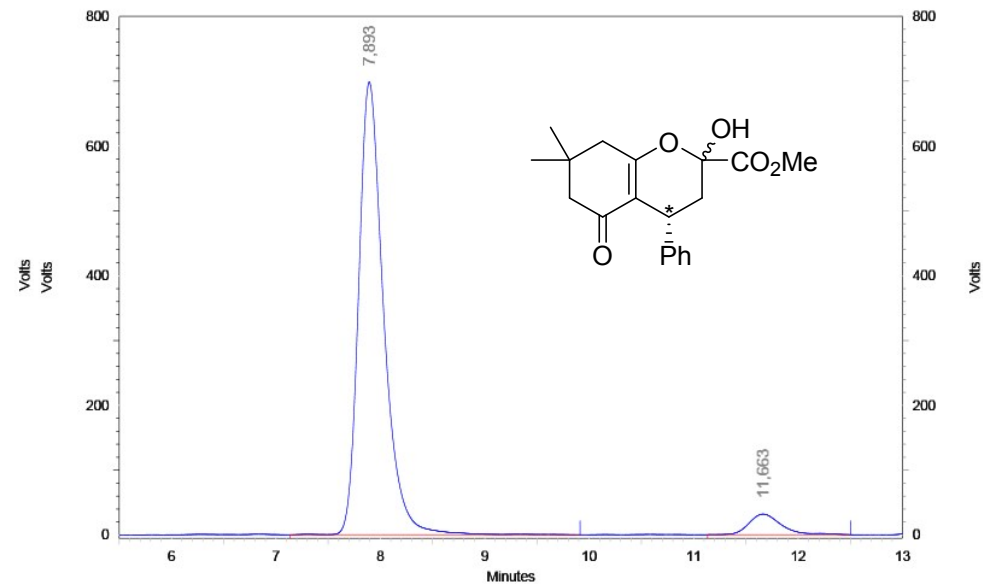

UV2000-254nm  
Results (System  
(2018-06-08  
15:55:45)  
(Original))

| Retention Time | Area     | Area % | Height | Height % |
|----------------|----------|--------|--------|----------|
| 7,893          | 11590892 | 94,44  | 698117 | 95,65    |
| 11,663         | 682432   | 5,56   | 31724  | 4,35     |

| Totals | Area     | Area % | Height | Height % |
|--------|----------|--------|--------|----------|
|        | 12273324 | 100,00 | 729841 | 100,00   |

Figure S89. HPLC chromatograms (Chiralpak AD-H, 4.6 mm ID  $\times$  250 mm, hexane/2-propanol 7:3, 0.7 mL/min) for adduct **11a** obtained from methyl benzylidenepyruvate (**9a**) and dimedone (**10**) using 0.5 %mol catalysts **2a** (left) and *ent-2a* (right) in chlorobenzene at room temperature. For HPLC chromatogram of a racemic sample, see Figure S91.



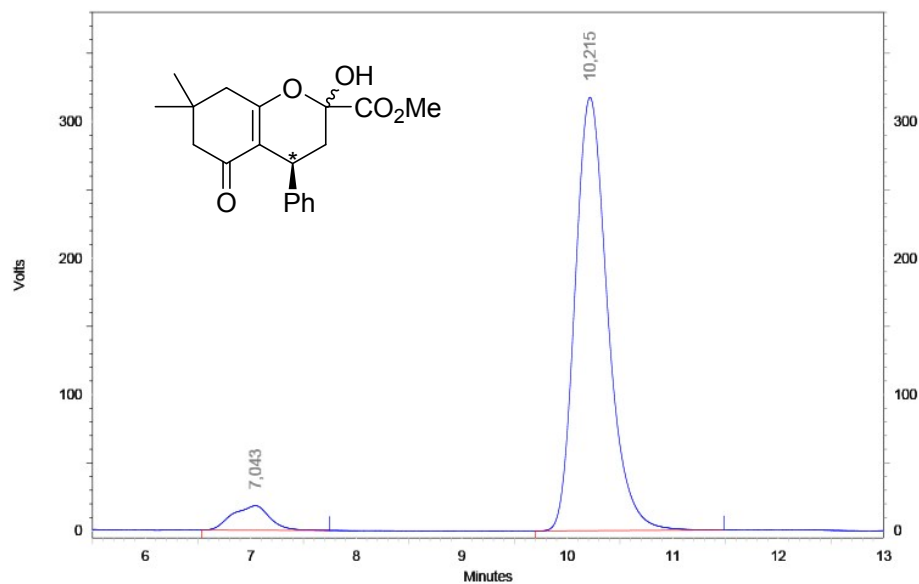

UV2000-254nm  
Results (System  
(2017-12-22  
11:14:57)  
(Reprocessed))

| Retention Time | Area    | Area % | Height | Height % |
|----------------|---------|--------|--------|----------|
| 7,043          | 440417  | 6,09   | 17936  | 5,35     |
| 10,215         | 6792348 | 93,91  | 317374 | 94,65    |

| Totals | 7232765 | 100,00 | 335310 | 100,00 |
|--------|---------|--------|--------|--------|
|--------|---------|--------|--------|--------|

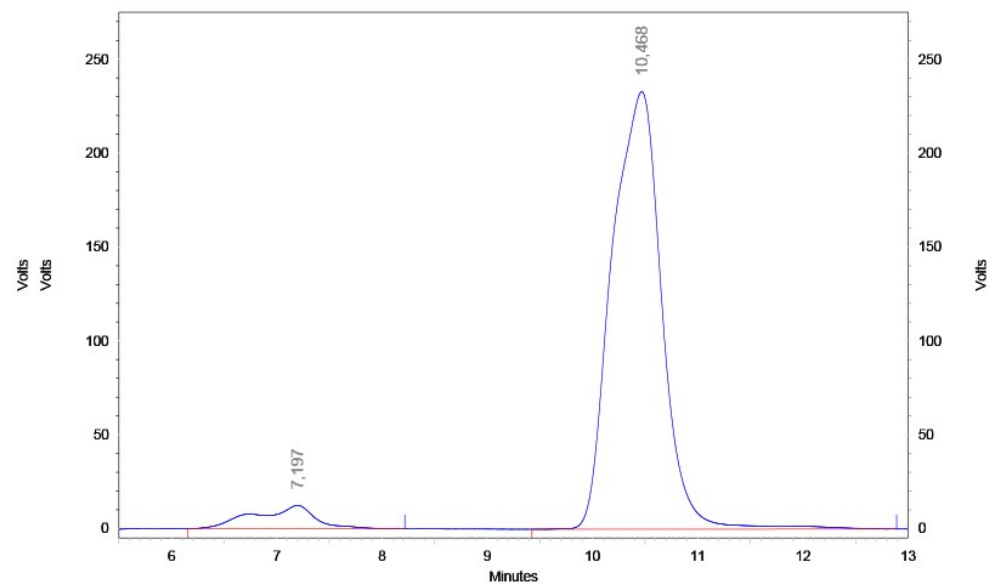

UV2000-254nm  
Results (System  
(2018-01-15  
11:50:08)  
(Original))

| Retention Time | Area    | Area % | Height | Height % |
|----------------|---------|--------|--------|----------|
| 7,197          | 496232  | 6,09   | 12419  | 5,06     |
| 10,468         | 7657564 | 93,91  | 233039 | 94,94    |

| Totals | 8153796 | 100,00 | 245458 | 100,00 |
|--------|---------|--------|--------|--------|
|--------|---------|--------|--------|--------|

Figure S90. HPLC chromatograms (Chiralpak AD-H, 4.6 mm ID × 250 mm, hexane/2-propanol 7:3, 0.7 mL/min) for adduct **11a** obtained on a 3-mmol scale from methyl benzylidenepyruvate (**9a**) and dimedone (**10**) using 1 %mol catalyst **2a** in chlorobenzene at room temperature: crude sample (left) and after purification by column chromatography (right). For chromatogram of a recrystallized sample and racemic **11a** see the following Figure S91.

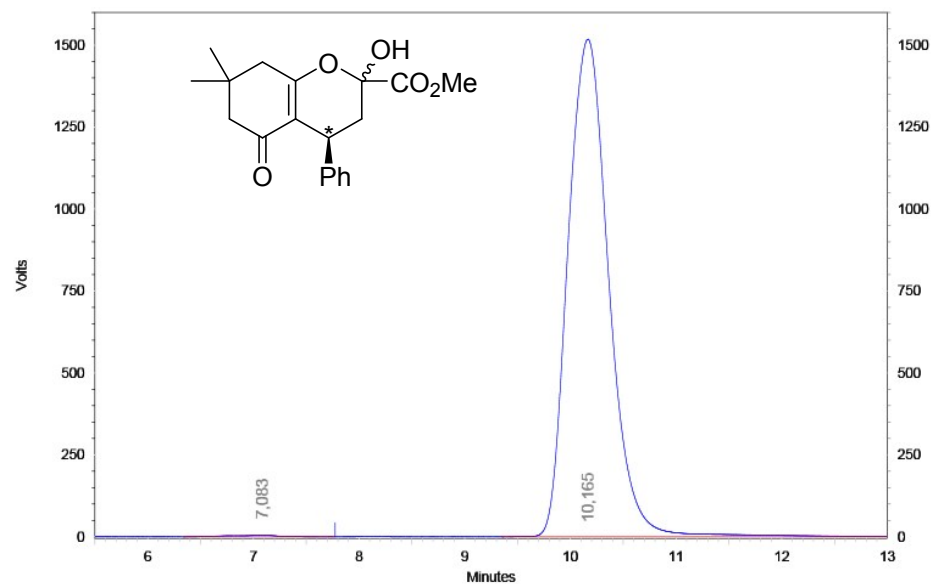

UV2000-254nm  
Results (System  
(2018-01-19  
11:48:54)  
(Reprocessed))

| Retention Time | Area     | Area % | Height  | Height % |
|----------------|----------|--------|---------|----------|
| 7,083          | 143096   | 0,35   | 4759    | 0,31     |
| 10,165         | 40733065 | 99,65  | 1518160 | 99,69    |

| Totals | Area     | Area % | Height  | Height % |
|--------|----------|--------|---------|----------|
|        | 40876161 | 100,00 | 1522919 | 100,00   |

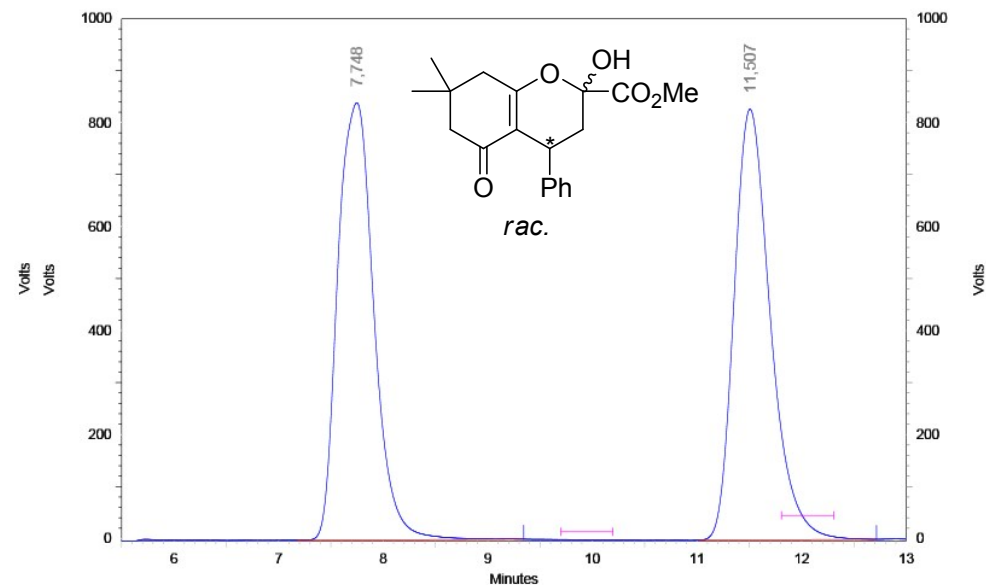

UV2000-254nm  
Results (System  
(2018-06-07  
11:57:09)  
(Reprocessed))

| Retention Time | Area     | Area % | Height | Height % |
|----------------|----------|--------|--------|----------|
| 7,748          | 20122513 | 50,25  | 840427 | 50,37    |
| 11,507         | 19923119 | 49,75  | 828242 | 49,63    |

| Totals | Area     | Area % | Height  | Height % |
|--------|----------|--------|---------|----------|
|        | 40045632 | 100,00 | 1668669 | 100,00   |

Figure S91. HPLC chromatograms (Chiralpak AD-H, 4.6 mm ID × 250 mm, hexane/2-propanol 7:3, 0.7 mL/min) for adduct **11a**: obtained on a 3-mmol scale using 1 %mol catalyst **2a** in chlorobenzene after recrystallization from *tert*-butyl methyl ether (first crop; for uncrystallized sample see the preceding Figure S90.) (left). Racemic product **11a** (right).

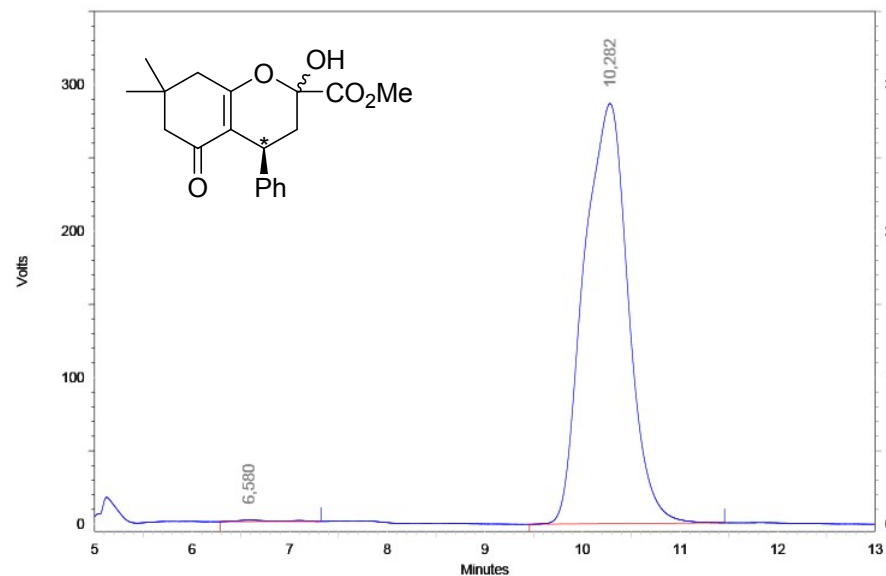

UV2000-254nm  
Results (System  
(2018-01-10  
11:34:38)  
(Original))

| Retention Time | Area    | Area % | Height | Height % |
|----------------|---------|--------|--------|----------|
| 6,580          | 28693   | 0,32   | 982    | 0,34     |
| 10,282         | 8998898 | 99,68  | 286713 | 99,66    |

| Totals | Area    | Area % | Height | Height % |
|--------|---------|--------|--------|----------|
|        | 9027591 | 100,00 | 287695 | 100,00   |

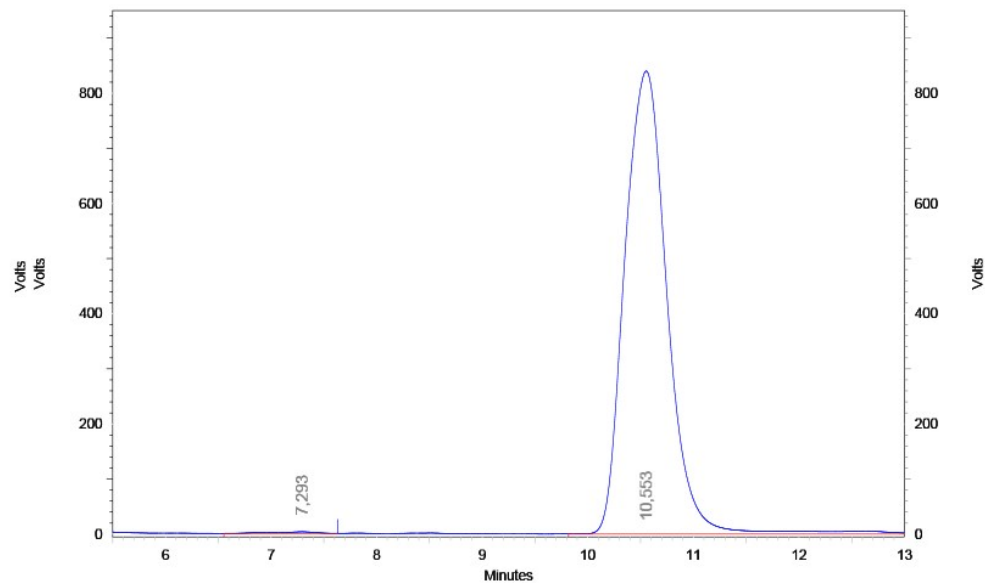

UV2000-254nm  
Results (System  
(2018-01-17  
14:34:31)  
(Reprocessed))

| Retention Time | Area     | Area % | Height | Height % |
|----------------|----------|--------|--------|----------|
| 7,293          | 86656    | 0,37   | 2895   | 0,34     |
| 10,553         | 23494825 | 99,63  | 839923 | 99,66    |

| Totals | Area     | Area % | Height | Height % |
|--------|----------|--------|--------|----------|
|        | 23581481 | 100,00 | 842818 | 100,00   |

Figure S92. HPLC chromatograms (Chiralpak AD-H, 4.6 mm ID × 250 mm, hexane/2-propanol 7:3, 0.7 mL/min) for adduct **11a** obtained from methyl benzylidenepyruvate (**9a**) and dimedone (**10**) using 1 %mol catalyst **2a** in chlorobenzene at -20 °C: On a 0.1-mmol scale (left), and on a 3-mmol scale after purification by column chromatography (right).

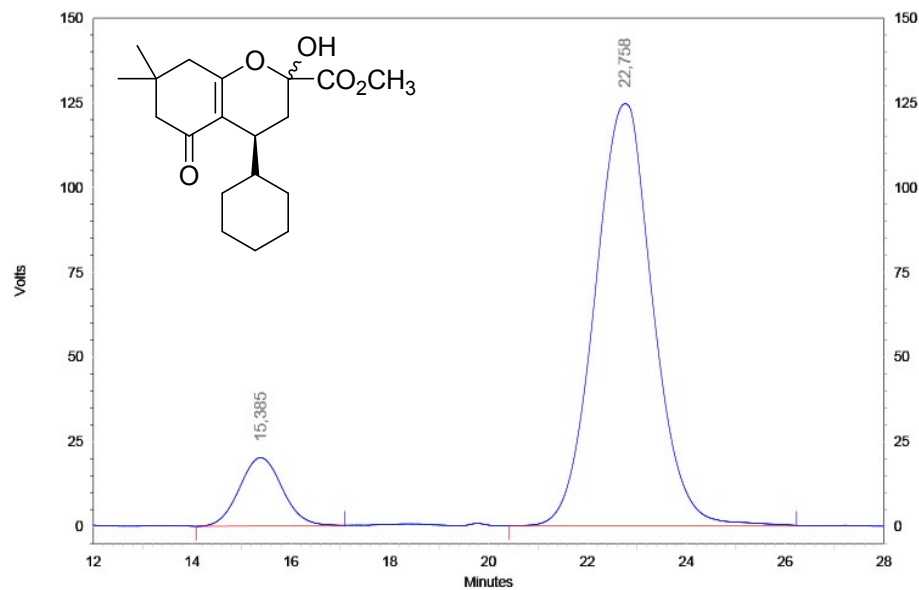

UV2000-254nm  
Results (System  
(2018-02-28  
15:04:33)  
(Original))

| Retention Time | Area     | Area % | Height | Height % |
|----------------|----------|--------|--------|----------|
| 15,385         | 1209699  | 10,70  | 20147  | 13,94    |
| 22,758         | 10099466 | 89,30  | 124415 | 86,06    |

| Totals | Area     | Area % | Height | Height % |
|--------|----------|--------|--------|----------|
|        | 11309165 | 100,00 | 144562 | 100,00   |

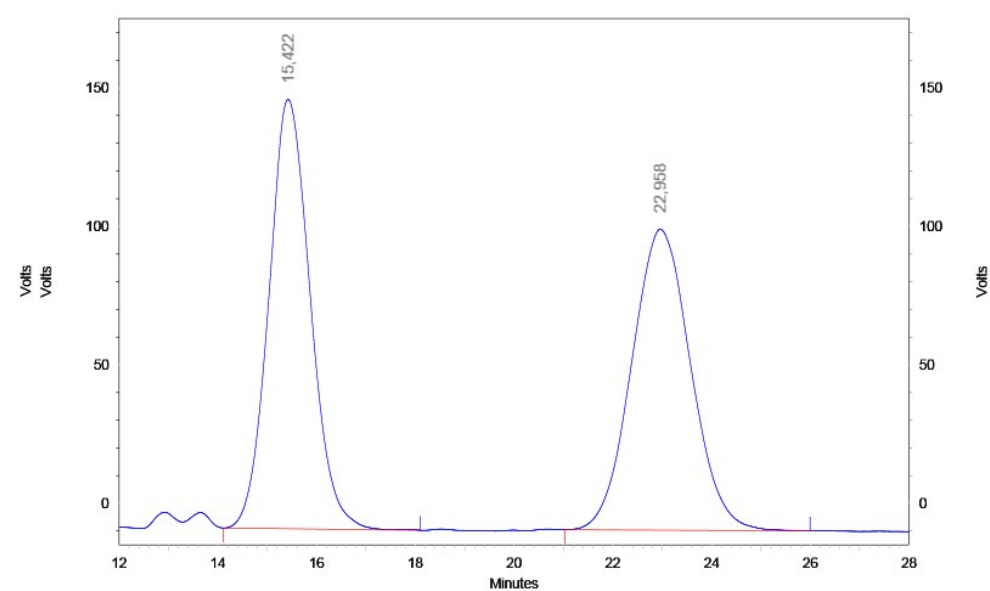

UV2000-254nm  
Results (System  
(2018-02-28  
14:34:29)  
(Original))

| Retention Time | Area    | Area % | Height | Height % |
|----------------|---------|--------|--------|----------|
| 15,422         | 9039346 | 50,07  | 155004 | 58,80    |
| 22,958         | 9014745 | 49,93  | 108625 | 41,20    |

| Totals | Area     | Area % | Height | Height % |
|--------|----------|--------|--------|----------|
|        | 18054091 | 100,00 | 263629 | 100,00   |

Figure S93. HPLC chromatograms (Chiralpak IC-3, 4.6 mm ID × 250 mm, hexane/2-propanol 9:1, 1 mL/min) for adduct **11b** obtained from methyl 5-cyclohexyl-3-oxo-pent-4-enoate (**9b**) and dimedone (**10**) with 10 %mol catalyst **2a** in chlorobenzene at room temperature (left) and a racemic sample (right). The results shown correspond to Table 4 entry 1.

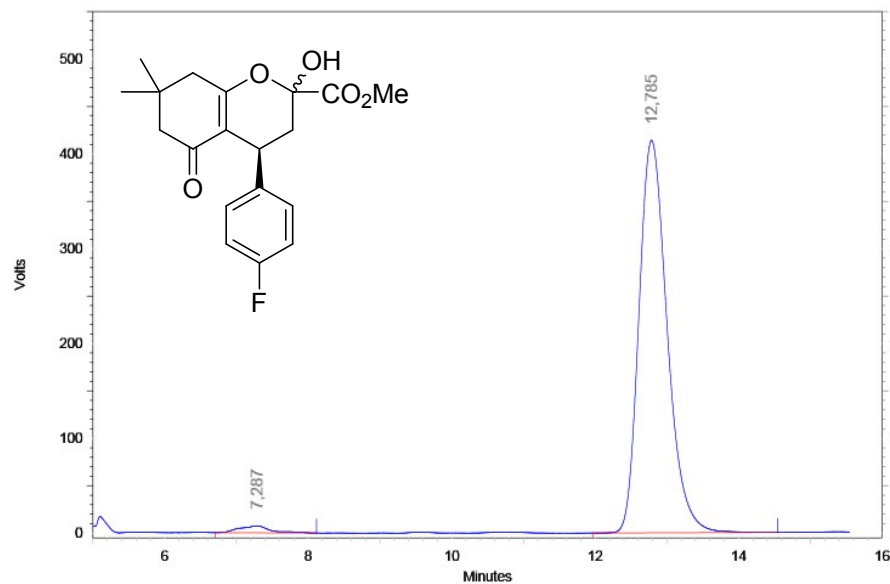

UV2000-254nm  
Results (System  
(2017-12-07  
12:58:44)  
(Original))

| Retention Time | Area     | Area % | Height | Height % |
|----------------|----------|--------|--------|----------|
| 7,287          | 219038   | 1,90   | 7371   | 1,75     |
| 12,785         | 11292906 | 98,10  | 413949 | 98,25    |

| Totals | Area     | Area % | Height | Height % |
|--------|----------|--------|--------|----------|
|        | 11511944 | 100,00 | 421320 | 100,00   |

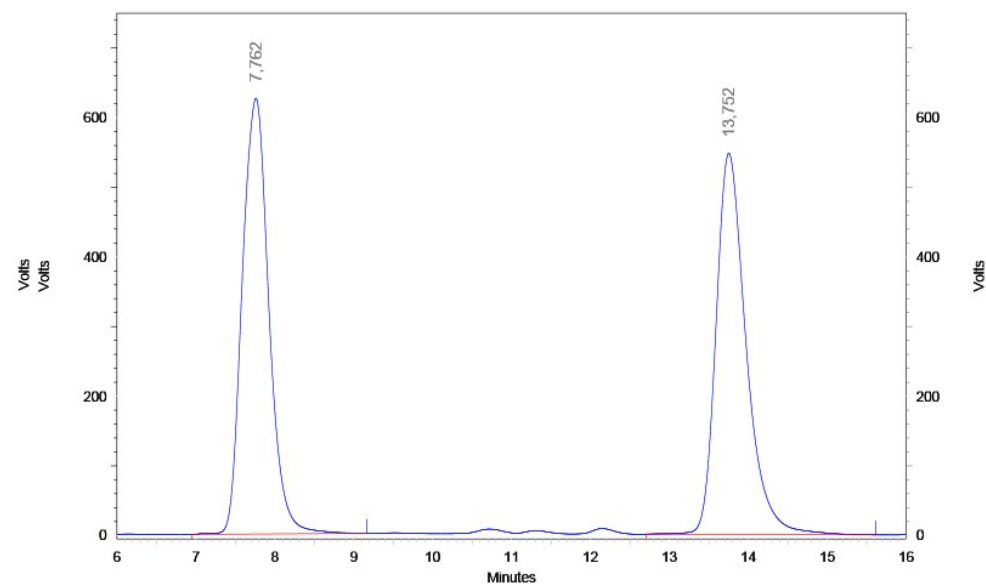

UV2000-254nm  
Results (System  
(2018-02-15  
11:44:55)  
(Reprocessed))

| Retention Time | Area     | Area % | Height | Height % |
|----------------|----------|--------|--------|----------|
| 7,762          | 14662165 | 50,27  | 625732 | 53,33    |
| 13,752         | 14504120 | 49,73  | 547485 | 46,67    |

| Totals | Area     | Area % | Height  | Height % |
|--------|----------|--------|---------|----------|
|        | 29166285 | 100,00 | 1173217 | 100,00   |

Figure S94. HPLC chromatograms (Chiralpak AD-H, 4.6 mm ID × 250 mm, hexane/2-propanol 7:3, 1 mL/min) for adduct **11c** obtained from methyl 4-(fluorobenzylidene)pyruvate (**9c**) and dimedone (**10**) using 10 %mol catalyst **2a** in chlorobenzene at room temperature (left) and a racemic sample (right). The results shown correspond to Table 4 entry 2.

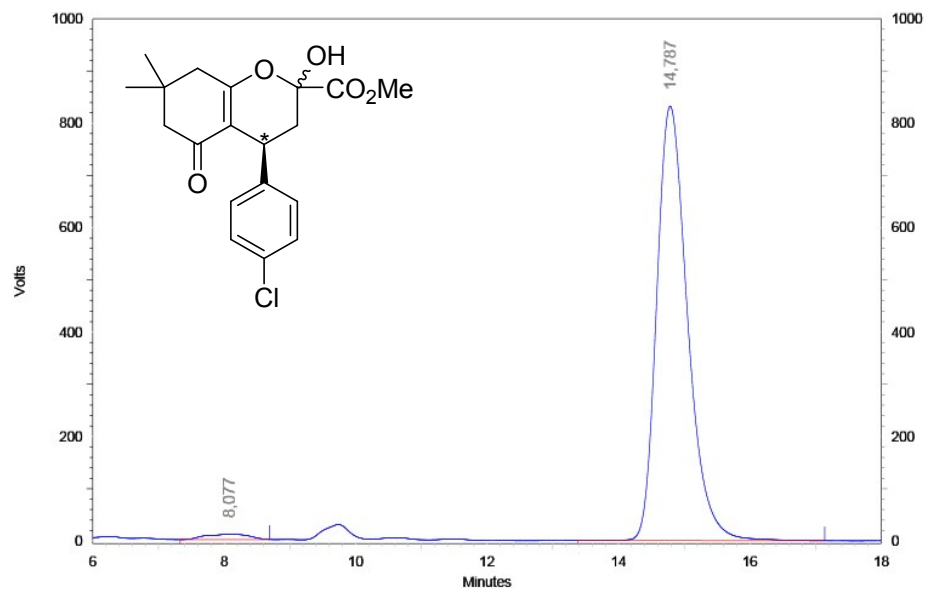

UV2000-254nm  
Results (System  
(2018-02-15  
13:10:52)  
(Original))

| Retention Time | Area     | Area % | Height | Height % |
|----------------|----------|--------|--------|----------|
| 8,077          | 477924   | 1,73   | 10487  | 1,24     |
| 14,787         | 27075779 | 98,27  | 831975 | 98,76    |

|        |          |        |        |        |
|--------|----------|--------|--------|--------|
| Totals | 27553703 | 100,00 | 842462 | 100,00 |
|--------|----------|--------|--------|--------|

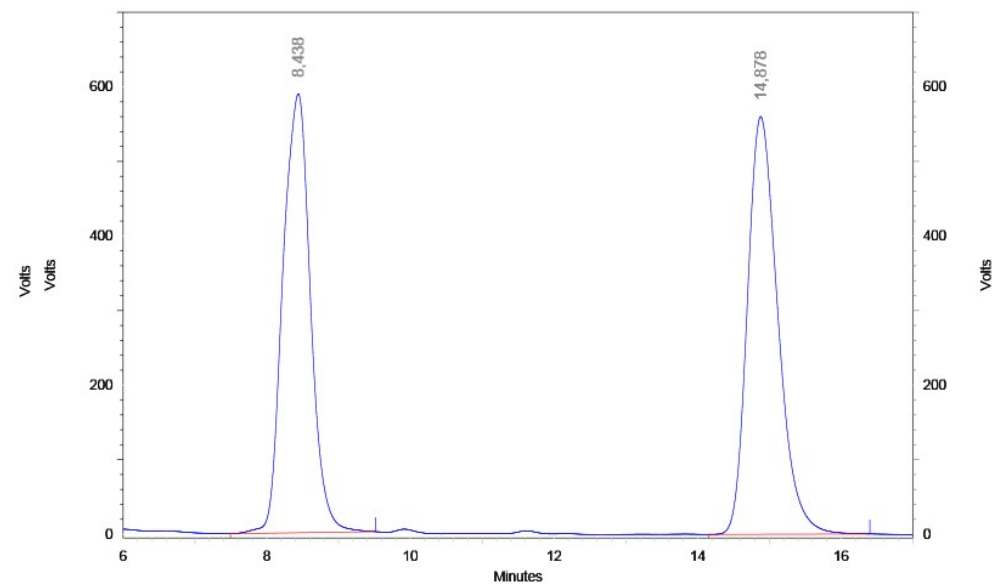

UV2000-254nm  
Results (System  
(2018-02-15  
12:49:06)  
(Original))

| Retention Time | Area     | Area % | Height | Height % |
|----------------|----------|--------|--------|----------|
| 8,438          | 15703357 | 48,78  | 588641 | 51,24    |
| 14,878         | 16487775 | 51,22  | 560134 | 48,76    |

|        |          |        |         |        |
|--------|----------|--------|---------|--------|
| Totals | 32191132 | 100,00 | 1148775 | 100,00 |
|--------|----------|--------|---------|--------|

Figure S95. HPLC chromatograms (Chiralpak AD-H, 4.6 mm ID × 250 mm, hexane/2-propanol 7:3, 1 mL/min) for adduct **11d** obtained from methyl 4-(chlorobenzylidene)pyruvate (**9d**) and dimedone (**10**) with 1 %mol catalyst **2a** in chlorobenzene at -20 °C (left) and a racemic sample (right). The results shown correspond to Table 4 entry 3.

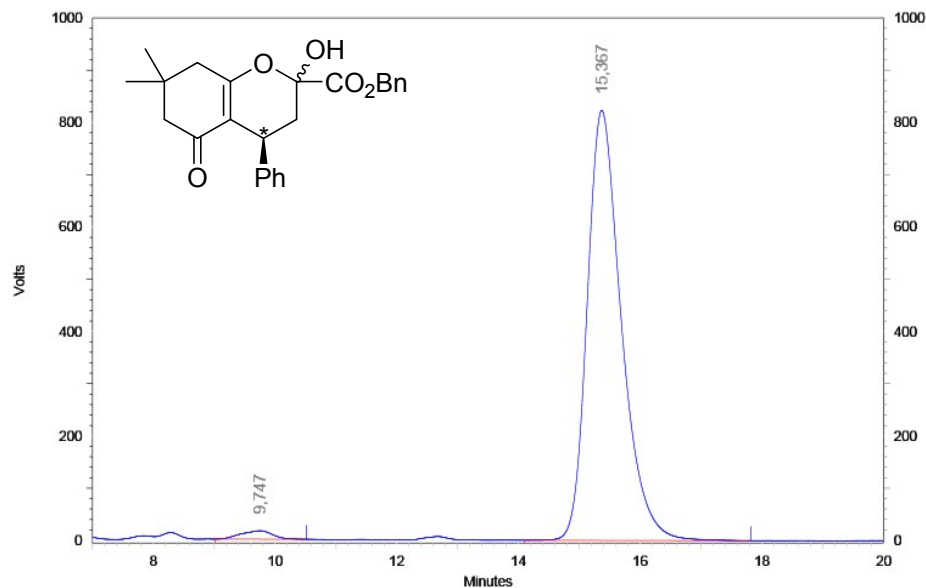

UV2000-254nm  
Results (System  
(2018-02-02  
10:03:53)  
(Original))

| Retention Time | Area     | Area % | Height | Height % |
|----------------|----------|--------|--------|----------|
| 9,747          | 578790   | 1,77   | 16115  | 1,92     |
| 15,367         | 32038492 | 98,23  | 823264 | 98,08    |

|        |          |        |        |        |
|--------|----------|--------|--------|--------|
| Totals | 32617282 | 100,00 | 839379 | 100,00 |
|--------|----------|--------|--------|--------|

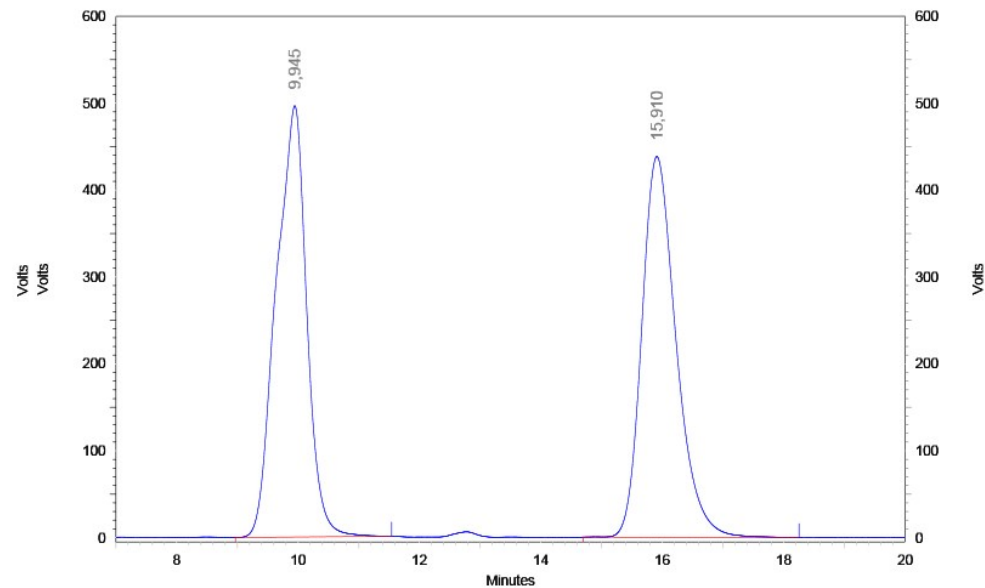

UV2000-254nm  
Results (System  
(2018-02-02  
09:36:48)  
(Reprocessed))

| Retention Time | Area     | Area % | Height | Height % |
|----------------|----------|--------|--------|----------|
| 9,945          | 17335926 | 50,14  | 496252 | 53,11    |
| 15,910         | 17238716 | 49,86  | 438124 | 46,89    |

|        |          |        |        |        |
|--------|----------|--------|--------|--------|
| Totals | 34574642 | 100,00 | 934376 | 100,00 |
|--------|----------|--------|--------|--------|

Figure S96. HPLC chromatograms (Chiralpak AD-H, 4.6 mm ID × 250 mm, hexane/2-propanol 7:3, 0.7 mL/min) for adduct **11e** obtained from benzyl benzylidenepyruvate (**9e**) and dimedone (**10**) using 10 %mol catalyst **2a** in chlorobenzene at room temperature (left) and a racemic sample (right). The results shown correspond to Table 4 entry 4.

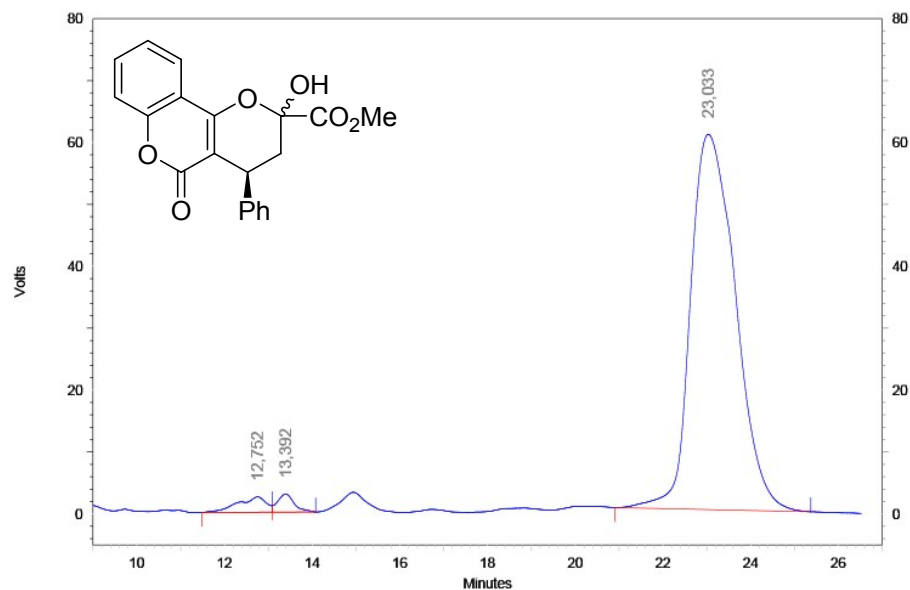

UV2000-254nm  
Results (System  
(2018-04-25  
12:40:01)  
(Reprocessed))

| Retention Time | Area    | Area % | Height | Height % |
|----------------|---------|--------|--------|----------|
| 12,752         | 111853  | 2,48   | 2469   | 3,74     |
| 13,392         | 76188   | 1,69   | 2910   | 4,41     |
| 23,033         | 4320516 | 95,83  | 60609  | 91,85    |

| Totals | Area    | Area % | Height | Height % |
|--------|---------|--------|--------|----------|
|        | 4508557 | 100,00 | 65988  | 100,00   |

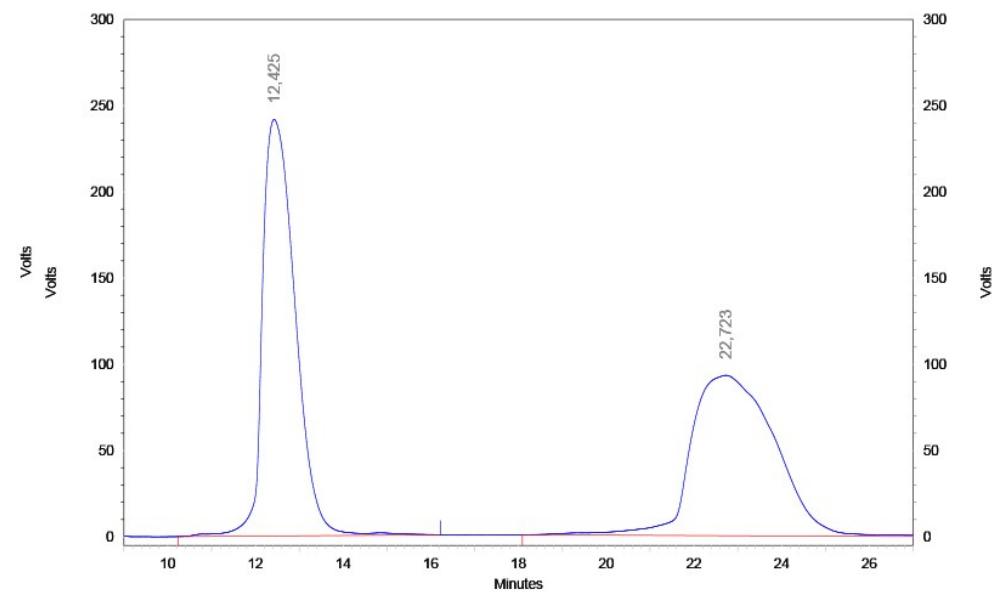

UV2000-254nm  
Results (System  
(2017-12-19  
13:17:44)  
(Original))

| Retention Time | Area     | Area % | Height | Height % |
|----------------|----------|--------|--------|----------|
| 12,425         | 12562809 | 50,45  | 241459 | 72,20    |
| 22,723         | 12338978 | 49,55  | 92983  | 27,80    |

| Totals | Area     | Area % | Height | Height % |
|--------|----------|--------|--------|----------|
|        | 24901787 | 100,00 | 334442 | 100,00   |

Figure S97. HPLC chromatograms (Chiralpak AD-H, 4.6 mm ID × 250 mm, hexane/2-propanol 8:2, 0.75 mL/min) for adduct **11f** obtained from methyl benzylidenepyruvate (**9a**) and 4-hydroxycoumarin with 10 %mol catalyst **2a** in chlorobenzene at -40 °C (left) and a racemic sample (right). The results correspond to values shown in Figure 7.



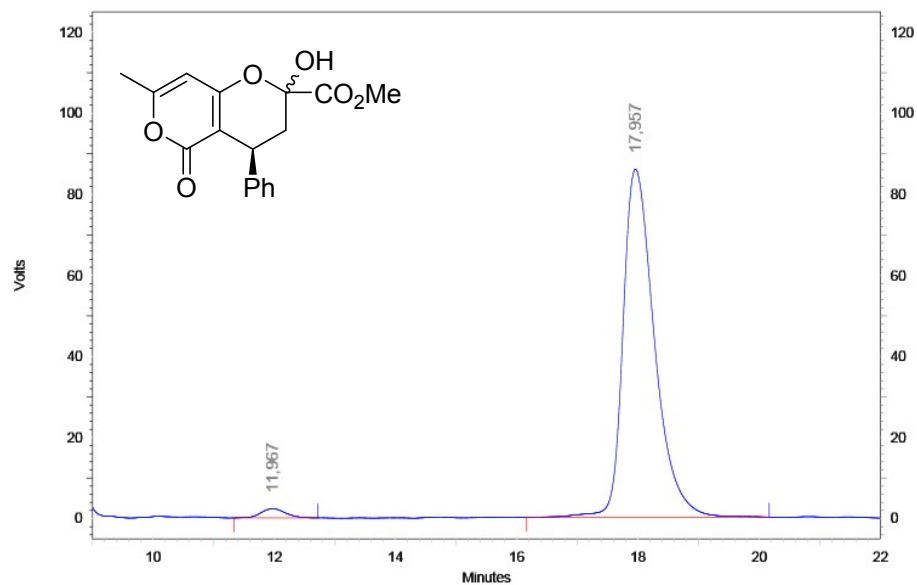

UV2000-254nm  
Results (System  
(2018-01-12  
15:14:05)  
(Original))

| Retention Time | Area    | Area % | Height | Height % |
|----------------|---------|--------|--------|----------|
| 11,967         | 64725   | 2,04   | 2280   | 2,59     |
| 17,957         | 3102219 | 97,96  | 85878  | 97,41    |

| Totals | Area    | Area % | Height | Height % |
|--------|---------|--------|--------|----------|
|        | 3166944 | 100,00 | 88158  | 100,00   |

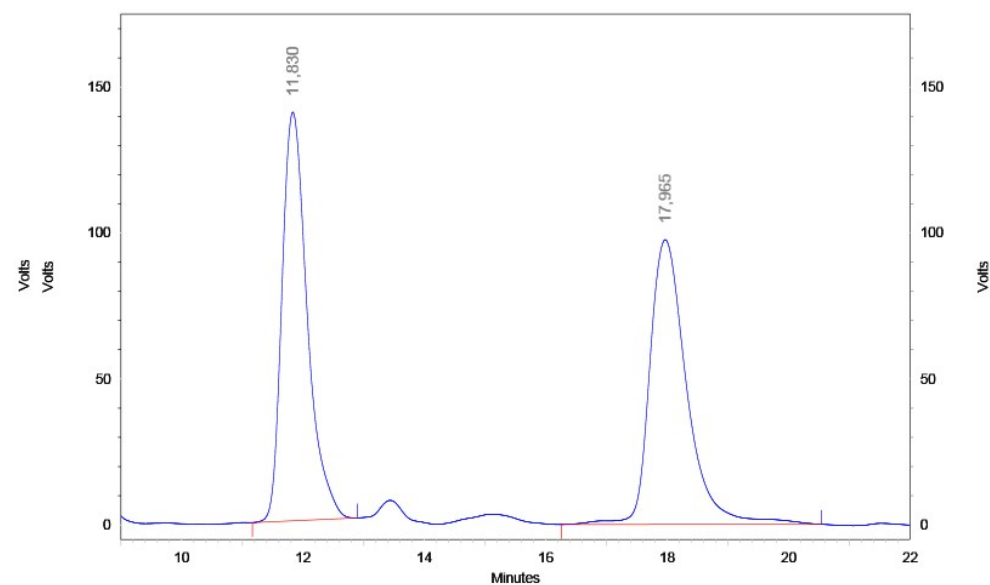

UV2000-254nm  
Results (System  
(2017-12-20  
10:58:10)  
(Original))

| Retention Time | Area    | Area % | Height | Height % |
|----------------|---------|--------|--------|----------|
| 11,830         | 4046813 | 49,44  | 139966 | 58,93    |
| 17,965         | 4139080 | 50,56  | 97548  | 41,07    |

| Totals | Area    | Area % | Height | Height % |
|--------|---------|--------|--------|----------|
|        | 8185893 | 100,00 | 237514 | 100,00   |

Figure S98. HPLC chromatograms (Chiralpak AD-H, 4.6 mm ID × 250 mm, hexane/2-propanol 8:2, 0.75 mL/min) for adduct **11g** obtained from methyl benzylidenepyruvate (**9a**) and triacetic acid lactone with 10 %mol catalyst **2a** in chlorobenzene at -40 °C (left) and a racemic sample (right). The results correspond to values shown in Figure 7.

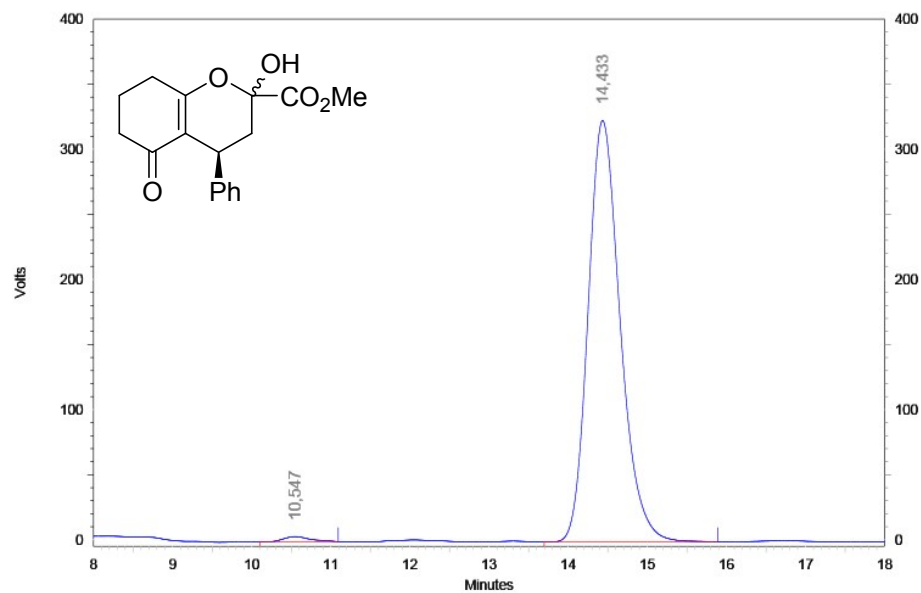

UV2000-220nm  
Results (System  
(2018-01-12  
13:15:54)  
(Original))

| Retention Time | Area    | Area % | Height | Height % |
|----------------|---------|--------|--------|----------|
| 10,547         | 100364  | 1,09   | 4107   | 1,25     |
| 14,433         | 9126995 | 98,91  | 323711 | 98,75    |

|        |         |        |        |        |
|--------|---------|--------|--------|--------|
| Totals | 9227359 | 100,00 | 327818 | 100,00 |
|--------|---------|--------|--------|--------|

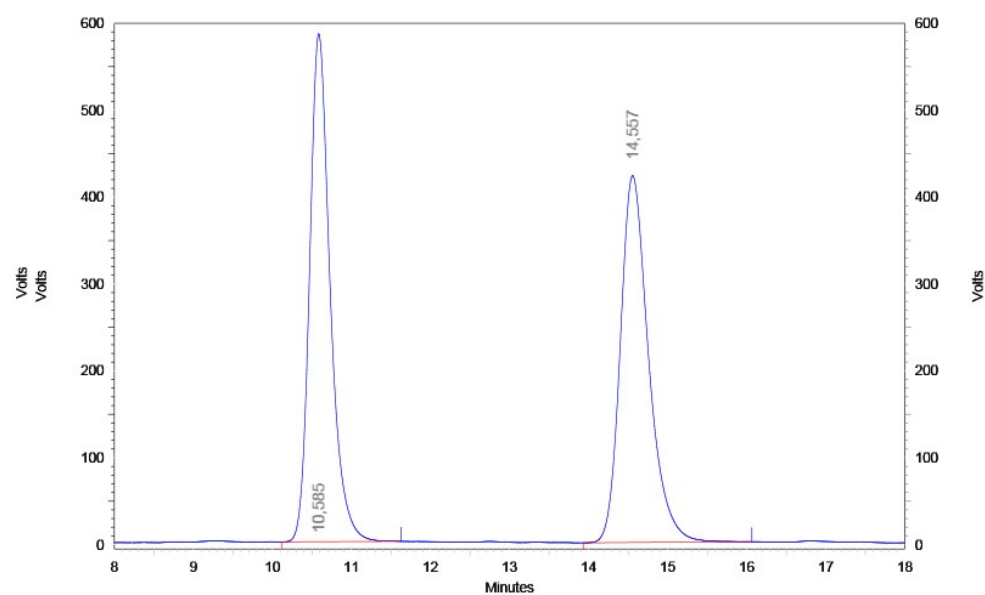

UV2000-220nm  
Results (System  
(2018-01-12  
12:53:48)  
(Reprocessed))

| Retention Time | Area     | Area % | Height | Height % |
|----------------|----------|--------|--------|----------|
| 10,585         | 10536524 | 50,14  | 584452 | 58,07    |
| 14,557         | 10476506 | 49,86  | 41,93  |          |

|        |          |        |         |        |
|--------|----------|--------|---------|--------|
| Totals | 21013030 | 100,00 | 1006541 | 100,00 |
|--------|----------|--------|---------|--------|

Figure S99. HPLC chromatograms (Chiralpak AD-H, 4.6 mm ID × 250 mm, hexane/2-propanol 8:2, 0.75 mL/min) for adduct **11h** obtained from methyl benzylidenepyruvate (**9a**) and 1,3-cyclohexanedione with 10 %mol catalyst **2a** in chlorobenzene at -40 °C (left) and a racemic sample (right). The results correspond to values shown in Figure 7.

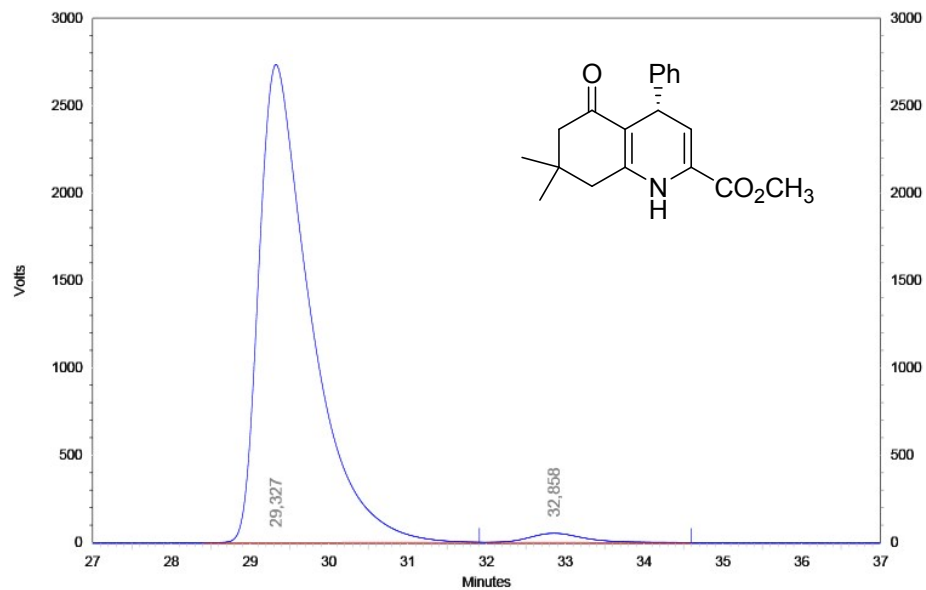

UV2000-254nm  
Results (System  
(2018-02-14  
13:29:24)  
(Original))

| Retention Time | Area      | Area % | Height  | Height % |
|----------------|-----------|--------|---------|----------|
| 29,327         | 124150899 | 98,11  | 2733805 | 98,15    |
| 32,858         | 2391824   | 1,89   | 51595   | 1,85     |

| Totals | Area      | Area % | Height  | Height % |
|--------|-----------|--------|---------|----------|
|        | 126542723 | 100,00 | 2785400 | 100,00   |

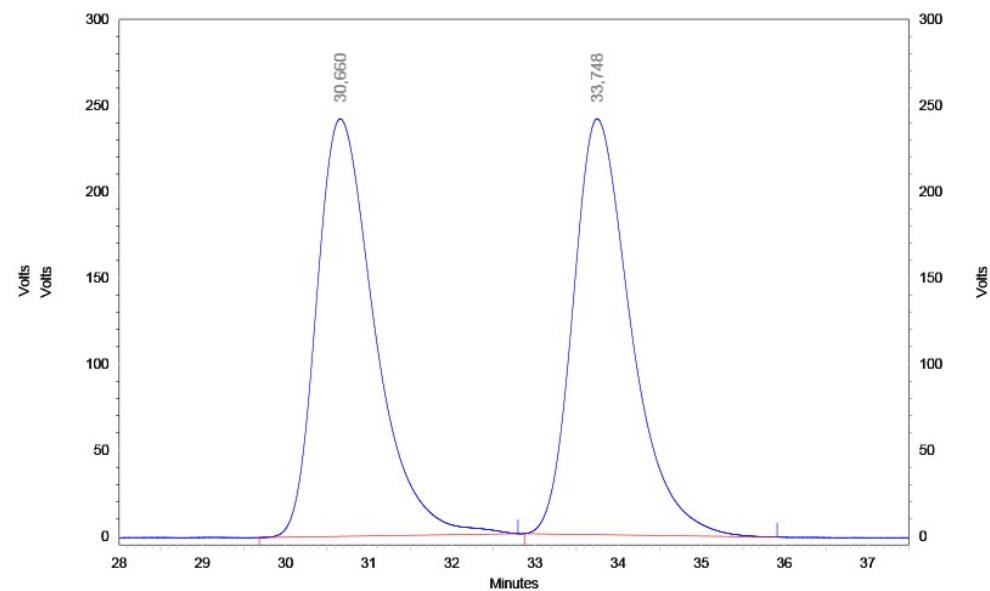

UV2000-254nm  
Results (System  
(2018-02-14  
10:06:23)  
(Original))

| Retention Time | Area     | Area % | Height | Height % |
|----------------|----------|--------|--------|----------|
| 30,660         | 11730254 | 50,22  | 242283 | 50,10    |
| 33,748         | 11628910 | 49,78  | 241282 | 49,90    |

| Totals | Area     | Area % | Height | Height % |
|--------|----------|--------|--------|----------|
|        | 23359164 | 100,00 | 483565 | 100,00   |

Figure S100. HPLC chromatograms (Chiralpak AD-H, 4.6 mm ID × 250 mm, hexane/2-propanol 9:1, 0.7 mL/min) for methyl (2*S*,4*S*)-1,4,5,6,7,8-hexahydro-7,7-dimethyl-5-oxo-4-phenyl-quinoline-2-carboxylate (**12**) obtained starting from hemiacetal sample shown in Figure S92 (left) and a racemic sample (right). The results correspond to figures shown in Scheme 3.

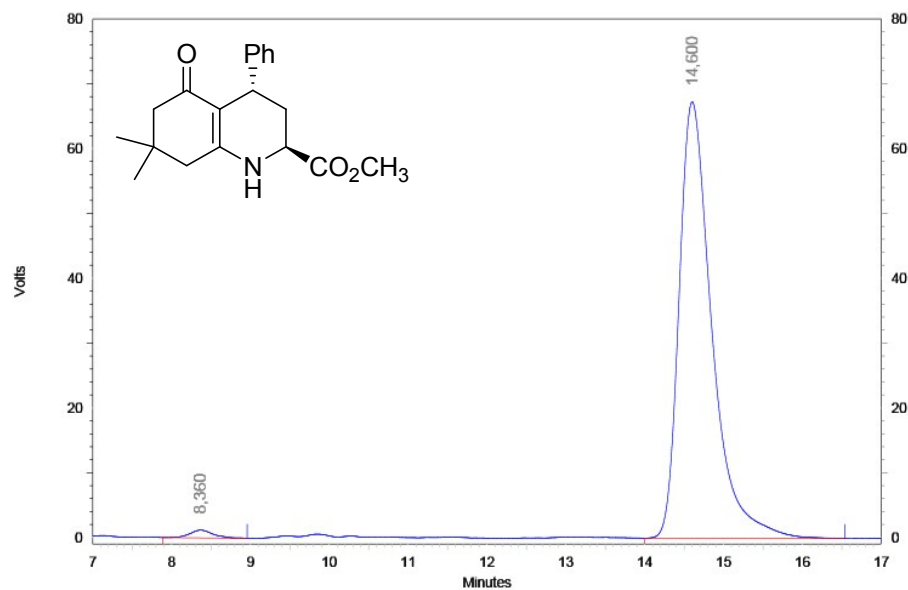

UV2000-254nm  
Results (System  
(2018-03-05  
12:54:10)  
(Original))

| Retention Time | Area    | Area % | Height | Height % |
|----------------|---------|--------|--------|----------|
| 8,360          | 24707   | 1,26   | 1194   | 1,74     |
| 14,600         | 1936422 | 98,74  | 67314  | 98,26    |

| Totals | Area    | Area % | Height | Height % |
|--------|---------|--------|--------|----------|
|        | 1961129 | 100,00 | 68508  | 100,00   |

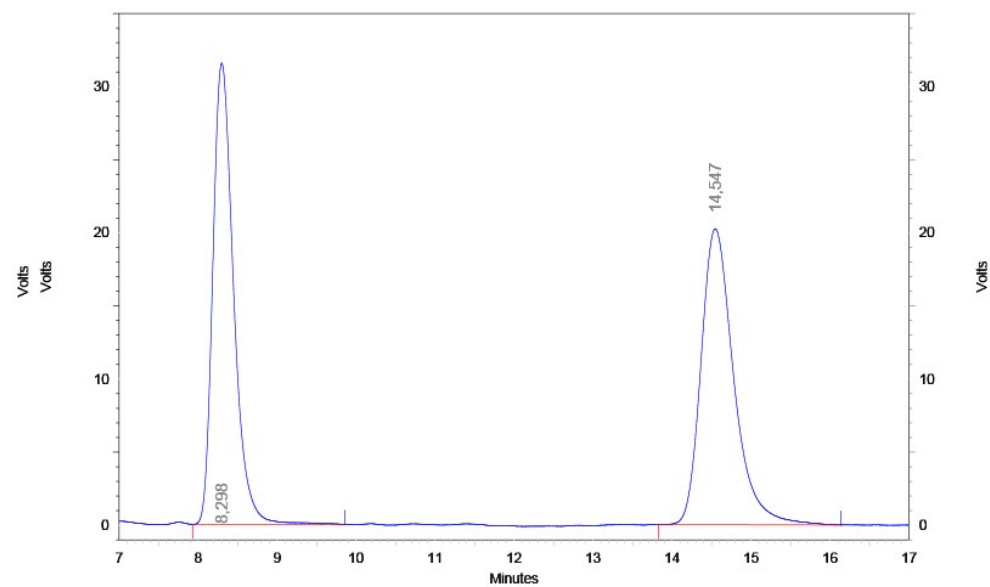

UV2000-254nm  
Results (System  
(2018-03-05  
13:33:47)  
(Reprocessed))

| Retention Time | Area   | Area % | Height | Height % |
|----------------|--------|--------|--------|----------|
| 8,298          | 575412 | 49,67  | 31545  | 60,92    |
| 14,547         | 583156 | 50,33  | 20240  | 39,08    |

| Totals | Area    | Area % | Height | Height % |
|--------|---------|--------|--------|----------|
|        | 1158568 | 100,00 | 51785  | 100,00   |

Figure S101. HPLC chromatograms (Chiralpak AD-H, 4.6 mm ID × 250 mm, hexane/2-propanol 8:2, 1 mL/min) for methyl 1,2,3,4,5,6,7,8-octahydro-7,7-dimethyl-5-oxo-4-phenyl-quinoline-2-carboxylate (**13**) obtained starting from hemiacetal sample shown in Figure S92 (left) and a racemic sample (right). The results correspond to figures shown in Scheme 3.

## DFT computations listings

### Listing of DFT/B3LYP/CC-pVDZ energies and atomic coordinates for **1i**

Zero-point correction= 0.386279 (Hartree/Particle)  
Thermal correction to Energy= 0.406012  
Thermal correction to Enthalpy= 0.406956  
Thermal correction to Gibbs Free Energy= 0.335649  
SCF: E(RB3LYP) = -1282.27590535  
Sum of electronic and zero-point Energies= -1281.889626  
Sum of electronic and thermal Energies= -1281.869893  
Sum of electronic and thermal Enthalpies= -1281.868949  
Sum of electronic and thermal Free Energies= -1281.940256  
Lowest frequencies: 18.4, 25.7 cm<sup>-1</sup>

| Atom | X        | Y        | Z        |
|------|----------|----------|----------|
| C    | -2.73483 | -0.57964 | 0.03472  |
| C    | -3.44058 | 0.05428  | 1.05781  |
| H    | -2.9823  | 0.15477  | 2.04216  |
| C    | -4.72682 | 0.53548  | 0.79123  |
| H    | -5.29305 | 1.03384  | 1.58109  |
| C    | -5.28701 | 0.37246  | -0.47873 |
| H    | -6.29211 | 0.74858  | -0.68262 |
| C    | -4.56881 | -0.27823 | -1.49007 |
| H    | -5.01376 | -0.4119  | -2.47849 |
| C    | -3.28588 | -0.76483 | -1.23682 |
| H    | -2.71562 | -1.28531 | -2.00703 |
| S    | -1.09309 | -1.24633 | 0.38291  |
| O    | -0.82893 | -1.02346 | 1.83311  |
| O    | -0.99822 | -2.60373 | -0.20873 |
| N    | -0.0684  | -0.2804  | -0.58434 |
| H    | 0.68589  | -0.9335  | -0.85437 |
| C    | 0.576    | 0.88944  | 0.05067  |
| H    | 0.59854  | 0.75091  | 1.14652  |
| C    | 2.03615  | 0.95124  | -0.46148 |
| H    | 1.98767  | 1.15708  | -1.54768 |
| C    | 2.76393  | 2.13748  | 0.20305  |
| H    | 3.80457  | 2.19062  | -0.15676 |
| H    | 2.81179  | 1.97869  | 1.2948   |
| C    | 2.03524  | 3.45817  | -0.08848 |
| H    | 2.08097  | 3.66569  | -1.17403 |
| H    | 2.55348  | 4.29453  | 0.40957  |
| C    | 0.56676  | 3.40063  | 0.3545   |
| H    | 0.52302  | 3.32811  | 1.45728  |
| H    | 0.04751  | 4.335    | 0.08421  |
| C    | -0.16198 | 2.19774  | -0.26029 |
| H    | -0.23333 | 2.31127  | -1.35692 |
| H    | -1.19535 | 2.14077  | 0.11784  |
| N    | 2.66297  | -0.36822 | -0.35029 |
| C    | 3.87308  | -0.58964 | -1.14546 |
| C    | 2.9703   | -0.89682 | 0.98504  |
| C    | 4.34451  | -1.99443 | -0.71517 |
| H    | 4.66188  | 0.16149  | -0.92154 |
| C    | 3.67092  | -2.22824 | 0.66718  |
| H    | 2.05421  | -1.02866 | 1.57993  |
| H    | 5.44238  | -2.04386 | -0.66144 |
| H    | 4.39058  | -2.5066  | 1.45111  |
| H    | 3.64369  | -0.51515 | -2.2205  |

|   |         |          |         |
|---|---------|----------|---------|
| H | 4.01874 | -2.75559 | -1.4395 |
| H | 2.92599 | -3.03493 | 0.59947 |
| H | 3.65341 | -0.22739 | 1.55149 |
